# Supplementary material for: Bayesian Detection of Expression Quantitative Trait Loci Hot Spots
Source: Oxford University Press journal article supplement (doi:10.1534/genetics.111.131425), 2011-09-17
Supplement: 131425si.pdf [file 131425si.pdf]

## File S1

### Supporting Information

#### S.1 Notation

We briefly recall here the notation that was used along the paper. Moreover we introduce some new notation to ease the the illustration of the MCMC scheme.

Let  $\mathbf{Y}$  and  $\mathbf{X}$  the  $n \times q$  and  $n \times p$  matrix of the responses and predictors, respectively. Let  $\mathbf{\Gamma} = \{\gamma_{lkj}, 1 \leq l \leq L, 1 \leq k \leq q, 1 \leq j \leq p\}$  the matrix of latent binary values, where  $L$  is the number of simulated chains,  $q$  is the number of responses and  $p$  is the number of predictors and let  $\mathbf{\Gamma}_k = (\gamma_{1k}, \dots, \gamma_{lk}, \dots, \gamma_{Lk})^T$  the  $L \times p$  latent binary matrix for the  $k$ th response in expanded state-space, where  $\gamma_{lk} = (\gamma_{lk1}, \dots, \gamma_{lkj}, \dots, \gamma_{lkp})^T$ . Similarly let  $\mathbf{\Omega} = \{\omega_{lkj}, 1 \leq l \leq L, 1 \leq k \leq q, 1 \leq j \leq p\}$  the matrix of selection probability with  $\omega_{lkj} = \omega_{lk} \times \rho_{lj}$  and let  $\mathbf{\Omega}_k = (\omega_{1k}, \dots, \omega_{lk}, \dots, \omega_{Lk})^T$  the  $L \times p$  selection matrix for the  $k$ th response in expanded state-space, where  $\omega_{lk} = (\omega_{lk1}, \dots, \omega_{lkj}, \dots, \omega_{lkp})^T$ . For a given chain  $l$ , let  $\boldsymbol{\omega}_l = (\omega_{l1}, \dots, \omega_{lk}, \dots, \omega_{lq})^T$  and  $\boldsymbol{\rho}_l = (\rho_{l1}, \dots, \rho_{lj}, \dots, \rho_{lp})^T$  the ‘row’ and the ‘column’ effect, respectively. Finally the temperature ladder for each regression equation  $k$  is denoted by  $\mathbf{t}_k = (t_{1k}, \dots, t_{lk}, \dots, t_{Lk})^T$  with  $1 = t_{1k} < t_{2k} < \dots < t_{Lk}$ .

## S.2 Technical details of MCMC implementation

### S.2.1 Full conditionals

Given (6), to sample the binary latent value  $\gamma_{lkj}$ , the selection probability  $\omega_{lkj} = \omega_{lk} \times \rho_{lj}$  and the scaling coefficient  $\tau$ , the tempered full conditionals in the expanded state-space are:

- $p(\gamma_{lk} | \dots) \propto p(\mathbf{y}_k | \mathbf{X}, \gamma_{lk}, \tau)^{1/t_{lk}} \prod_{j=1}^p p(\gamma_{lkj} | \omega_{lkj})^{1/t_{lk}}$
- $p(\omega_{lk} | \dots) \propto p(\omega_{lk})^{1/t_{lk}} \prod_{j=1}^p p(\gamma_{lkj} | \omega_{lkj})^{1/t_{lk}}$
- $p(\rho_{lj} | \dots) \propto p(\rho_{lj}) \prod_{k=1}^q p(\gamma_{lkj} | \omega_{lkj})^{1/t_{lk}}$
- $p(\tau | \dots) \propto p(\tau) \prod_{l=1}^L \prod_{k=1}^q p(\mathbf{y}_k | \mathbf{X}, \gamma_{lk}, \tau)^{1/t_{lk}}$

Note that in the full conditional  $p(\rho_{lj} | \dots)$  the prior density  $p(\rho_{lj})$  is not tempered and the reason will be explained in Supporting Information S.2.3.

### S.2.2 $\Gamma$ update

The update of the elements of the  $q \times p$  latent binary matrix  $\Gamma$  is of paramount importance and efficient algorithms are required in order to visit the very large model space  $(2^p)^q$  and to escape from local modes. In the following we provide some technical details omitted from the main text of the local and global moves that we found useful to implement. At each sweep of the algorithm each/both of moves can be applied to *all* the  $q$  regression equations or to a random without replacement subgroup of them (see Richardson et al. (2011) for alternative subgroup selection with adaptive probability).

### Local move

We first introduce the single chain sampling scheme and then we extend the results for multiple chains. There are many ways to update locally  $\gamma_k$ , but we found useful to apply an extension of Bottolo and Richardson (2010) proposal, where traditional samplers used in Bayesian variable selection (*i.e.* MC<sup>3</sup>, Gibbs sampler and Reversible Jump) are replaced by a Metropolis-within-Gibbs sampler known as Fast Scan Metropolis-Hastings (FSMH). Let  $L_{k(j=1)} = p(\mathbf{y}_k | \mathbf{X}, \boldsymbol{\gamma}_{k(j=1)}, \tau)$  and  $L_{k(j=0)} = p(\mathbf{y}_k | \mathbf{X}, \boldsymbol{\gamma}_{k(j=0)}, \tau)$  with  $\boldsymbol{\gamma}_{k(j=1)} = (\gamma_{k1}, \dots, \gamma_{kj} = 1, \dots, \gamma_{kp})^T$  and  $\boldsymbol{\gamma}_{k(j=0)} = (\gamma_{k1}, \dots, \gamma_{kj} = 0, \dots, \gamma_{kp})^T$  the marginal likelihood once the regression coefficients  $\boldsymbol{\beta}_k$  and the residual error variance  $\sigma_k^2$  are integrated out. Moreover let  $p(\gamma_{kj} = 1 | \omega_{kj}) = \omega_{kj}$  and  $p(\gamma_{kj} = 0 | \omega_{kj}) = 1 - \omega_{kj}$ . If a Gibbs sampler update is performed, a new value of  $\gamma_{kj}$  is drawn from a Bernoulli distribution with probability

$$\theta_{kj} = \frac{\omega_{kj} L_{k(j=1)}}{(1 - \omega_{kj}) L_{k(j=0)} + \omega_{kj} L_{k(j=1)}} \quad (\text{S.1})$$

if, in the previous iteration,  $\gamma_{kj} = 0$  since by independence  $p(\gamma_{kj} = 1 | \boldsymbol{\gamma}_{k \setminus j}, \boldsymbol{\omega}_k) = p(\gamma_{kj} = 1 | \omega_{kj})$  (with an obvious modification if  $\gamma_{kj} = 1$  in the previous iteration). However in a sparse framework, where  $p_{\gamma_k} \ll p$ , this probability is dominated by  $\omega_{kj}$  and if  $\omega_{kj}$  is small (because for instance  $\omega_k$  or  $\rho_j$  or both are small) also  $\theta_{kj}$  will be small. For instance, it easy to show that when  $p_{\gamma_k} \ll p$  and therefore by Kohn et al. (2001)  $a_k \ll b_k$ , the sampled value of  $\omega_k$  is, on average, very small

$$E(\omega_k | \mathbf{y}_k) = \frac{p_{\gamma_k} + a_k}{p + a_k + b_k}.$$

It turns out that, if  $\gamma_{kj} = 0$ , it is likely that also the new sampled value will be zero. Kohn et al. (2001) propose to split the acceptance probability of the Metropolised version of (S.1) (to add a

new covariate in the regression)

$$1 \wedge \frac{\omega_{kj} L_{k(j=1)}}{(1 - \omega_{kj}) L_{k(j=0)}} \frac{Q_{kj}(1 \rightarrow 0)}{Q_{kj}(0 \rightarrow 1)},$$

where  $Q_{kj}(\cdot \rightarrow \cdot)$  is the proposal density, into two parts: firstly, sampling a proposed value of  $\gamma_{kj}, \gamma_{kj}^*$ , from a Bernoulli distribution with probability  $\omega_{kj}$  and then, if  $\gamma_{kj}^* \neq \gamma_{kj}$ , accept the new value with probability

$$1 \wedge \frac{L_{k(j=1)}}{L_{k(j=0)}}$$

since  $Q_{kj}(0 \rightarrow 1) = \omega_{kj}$  and  $Q_{kj}(1 \rightarrow 0) = 1 - \omega_{kj}$ , with an obvious modification if a deletion is proposed. The advantage of this scheme is that the time consuming evaluation of the marginal likelihood  $L_{kj}$  is limited to the set of variables where  $\gamma_{kj}^* \neq \gamma_{kj}$ .

The same sampling scheme can be extended to a parallel tempering set-up as illustrated in Bottolo and Richardson (2010). In this case the Metropolis-within-Gibbs acceptance probability of the  $j$ th predictor in the  $k$ th regression and the  $l$ th chain is

$$1 \wedge \frac{L_{lk(j=1)}^{1/t_{lk}}}{L_{lk(j=0)}^{1/t_{lk}}},$$

where  $L_{lk(j=1)}^{1/t_{lk}} = [p(\mathbf{y}_k | \mathbf{X}, \gamma_{lk(j=1)}, \tau)]^{1/t_{lk}}$  and similarly for  $L_{lk(j=0)}^{1/t_{lk}}$ , since adding (deleting) a covariate in the regression equation is proposed with probability  $Q_{lkj}(0 \rightarrow 1 | t_{lk}) = \tilde{\omega}_{lkj}(t_{lk})$  ( $Q_{lkj}(1 \rightarrow 0 | t_{lk}) = 1 - \tilde{\omega}_{lkj}(t_{lk})$ ), with

$$\tilde{\omega}_{lkj}(t_{lk}) = \frac{\omega_{lkj}^{1/t_{lk}}}{\omega_{lkj}^{1/t_{lk}} + (1 - \omega_{lkj})^{1/t_{lk}}}$$

the renormalised probability  $[p(\gamma_{lkj} = 1 | \omega_{lkj})]^{1/t_{lk}} = \omega_{lkj}^{1/t_{lk}}$  and  $t_{lk}$  the temperature attached to the  $k$ th regression in the  $l$ th chain. Further discussion and advantages of this sampling scheme over MC<sup>3</sup>, Reversible Jump and Gibbs sampler in a multiple chain set-up when the number of

predictors is very large with respect to the number of truly associated variables are presented in Bottolo and Richardson (2010).

### Global moves

We recall that global moves are bold moves that try to swap part or the whole state of two randomly selected chains among the population of chains (Liang and Wong, 2000). In the following we present the accepted probability of crossover operator (partial swap), exchange operator and all-exchange operator (full swap).

Suppose that in the  $k$ th regression two new latent binary vectors  $\gamma_{lk}^*$  and  $\gamma_{rk}^*$  are generated from two preselected chains,  $l$  and  $r$ , according to some crossover operator (Liang and Wong, 2000; Bottolo and Richardson, 2010). The proposed population of chains in the  $k$ th regression  $\Gamma_k^* = (\gamma_{1k}, \dots, \gamma_{lk}^*, \dots, \gamma_{rk}^*, \dots, \gamma_{Lk})^T$  is accepted with probability

$$1 \wedge \frac{\exp \{f(\gamma_{lk}^*|\omega_{lk}, \tau)/t_{lk} + f(\gamma_{rk}^*|\omega_{rk}, \tau)/t_{rk}\} Q_k(\Gamma_k^*, \Gamma_k|\Omega_k, \tau, t_k)}{\exp \{f(\gamma_{lk}|\omega_{lk}, \tau)/t_{lk} + f(\gamma_{rk}|\omega_{rk}, \tau)/t_{rk}\} Q_k(\Gamma_k, \Gamma_k^*|\Omega_k, \tau, t_k)},$$

where  $f(\gamma_{lk}|\omega_{lk}, \tau) = \log(p(\mathbf{y}_k|\mathbf{X}, \gamma_{lk}, \tau)) + \sum_j \log(p(\gamma_{lkj}|\omega_{lkj}))$  and  $Q_k(\Gamma_k, \cdot|\Omega_k, \tau, t_k)$  is the proposal density which is defined as the product of the selection probability and the crossover operator probability (Liang and Wong, 2000). The transition density depends on the selection probabilities  $\Omega_k$  in the  $k$ th regression, the scaling coefficient  $\tau$  and the  $k$ th regression temperature ladder  $t_k$ .

The exchange operator can be seen as special case of the crossover operator where the whole information contained in the two preselected chains with uniform probability  $l$  and  $r$  are tentatively swapped with probability

$$1 \wedge \frac{\exp \{f(\gamma_{rk}|\omega_{lk}, \tau)/t_{lk} + f(\gamma_{lk}|\omega_{rk}, \tau)/t_{rk}\}}{\exp \{f(\gamma_{lk}|\omega_{lk}, \tau)/t_{lk} + f(\gamma_{rk}|\omega_{rk}, \tau)/t_{rk}\}}$$

since  $Q_k(\mathbf{\Gamma}_k, \mathbf{\Gamma}_k^* | \mathbf{\Omega}_k, \tau, \mathbf{t}_k) = Q_k(\mathbf{\Gamma}_k^*, \mathbf{\Gamma}_k | \mathbf{\Omega}_k, \tau, \mathbf{t}_k)$  because the selection probability is uniform over the  $L$  chains (random selection without replacement).

Finally, in the all-exchange operator the chains whose states are swapped are selected at random with probability equal to

$$p_{hk} = \frac{\tilde{p}_{hk}}{\sum_{h=1}^{1+L(L-1)/2} \tilde{p}_{hk}}, \quad (\text{S.2})$$

where in (S.2) each pair  $(l, r < l)$  is denoted by a single number  $h$ ,  $\tilde{p}_{hk} = \tilde{p}_{(l,r)k}$ , including the rejection move,  $h = 1$  with  $\tilde{p}_{(l,r)k} = \exp\{(f(\gamma_{rk} | \omega_{rk}, \tau) - f(\gamma_{lk} | \omega_{lk}, \tau))(1/t_{lk} - 1/t_{rk})\}$ .

### S.2.3 $\Omega$ update

For each chain  $l$ ,  $l = 1, \dots, L$ , we update the elements of the  $q \times p$  selection probability matrix  $\Omega$  by using a Metropolis-within-Gibbs sampler with adaptive proposals. Let  $\omega_{lk}^*$  and  $\rho_{lj}^*$  the proposed new values of the  $k$ th row effect and  $j$ th column effect in the  $l$ th chain respectively.

The acceptance probability of the two parameters is

$$1 \wedge \left[ \frac{(\omega_{lk}^*)^{p\gamma_{lk}} (1 - \omega_{lk}^*)^{p-p\gamma_{lk}} \text{Beta}(\omega_{lk}^*; a_{\omega_k}, b_{\omega_k}) | J(\lambda^{-1}(\omega_{lk}^*)) |}{\omega_{lkj}^{p\gamma_{lk}} (1 - \omega_{lkj})^{p-p\gamma_{lk}} \text{Beta}(\omega_{lkj}; a_{\omega_k}, b_{\omega_k}) | J(\lambda^{-1}(\omega_{lkj})) |} \right]^{1/t_{lk}} \frac{Q_{lk}(\lambda_{lk}^*, \lambda_{lk})}{Q_{lk}(\lambda_{lk}, \lambda_{lk}^*)} \quad (\text{S.3})$$

and

$$1 \wedge \frac{Ga(\rho_{lj}^*; c_{\rho_j}, d_{\rho_j}) | J(\varphi^{-1}(\rho_{lj}^*)) |}{Ga(\rho_{lj}; c_{\rho_j}, d_{\rho_j}) | J(\varphi^{-1}(\rho_{lj})) |} \prod_{k=1}^q \left[ \frac{(\omega_{lkj}^*)^{\gamma_{lkj}} (1 - \omega_{lkj}^*)^{1-\gamma_{lkj}}}{\omega_{lkj}^{\gamma_{lkj}} (1 - \omega_{lkj})^{1-\gamma_{lkj}}} \right]^{1/t_{lk}} \frac{Q_{lj}(\varphi_{lj}^*, \varphi_{lj})}{Q_{lj}(\varphi_{lj}, \varphi_{lj}^*)}, \quad (\text{S.4})$$

where in (S.3)  $p\gamma_{lk} = \gamma_{lk}^T \mathbf{1}_p$ ,  $\lambda_{lk} = \text{logit}(\omega_{lk})$ ,  $J(\lambda^{-1}(\omega_{lk}))$  is the Jacobian of the inverse transformation evaluated in  $\omega_{lk}$  and  $\text{Beta}(\cdot)$  is the beta density function, while in (S.4)  $J(\varphi^{-1}(\rho_{lj}))$  is the Jacobian of the inverse transformation evaluated in  $\rho_{lj}$ ,  $\omega_{lkj}^* = \omega_{lk} \times \rho_{lj}^*$ , and  $Ga(\cdot)$  is the gamma density function. As a technical point, since the prior density  $p(\rho_{lj})$  cannot be indexed

by  $k$ , in order to write the acceptance probability (S.4), in our model the prior for  $\rho_{lj}$  is not tempered.

We sample the proposed new values  $\omega_{lk}^*$  and  $\rho_{lj}^*$  after suitable transformation from  $Q_{lk}(\lambda_{lk}, \cdot) = \phi(\lambda_{lk}, s_{lk}^2(b))$  and  $Q_{lj}(\varphi_{lj}, \cdot) = \phi(\varphi_{lj}, s_{lj}^2(b))$ , respectively, where  $s_{lk}(b)$  and  $s_{lj}(b)$  are the adaptive proposals' standard deviations at batch  $b$  and  $\phi(\cdot)$  is the normal density function. Following Roberts and Rosenthal (2009), *asymptotic convergence* is obtained enforcing the *diminishing adaptation condition* and imposing the *bounded convergence condition*. For the former condition, after the batch  $b$ th of 50 sweeps, say, the proposals' standard deviation are updated as follow:  $s_{lk}(b+1) = s_{lk}(b) \pm \delta_s(b)$  and  $s_{lj}(b+1) = s_{lj}(b) \pm \delta_s(b)$ , where we add (subtract) to the current values  $s_{lk}(b)$  and  $s_{lj}(b)$  the quantity  $\delta_s(b) = \min\{0.01, b^{-1/2}\}$  if the acceptance frequency of (S.3) and (S.4) are higher (lower) than the optimal acceptance rate (0.44), respectively. The latter condition is fulfilled assuming that  $L_\lambda < s_{lk} < U_\lambda$  and  $L_\varphi < s_{lj} < U_\varphi$  for some large positive (negative) values of  $U_\lambda$  and  $U_\varphi$  ( $L_\lambda$  and  $L_\varphi$ ).

#### S.2.4 $\tau$ updates

The variable scaling coefficient is common to *all* the  $q$  regression equations and to *all*  $L$  chains.

A new value  $\tau^*$  is obtained using a Metropolis-with-Gibbs with acceptance probability

$$1 \wedge \frac{Ga(\tau^*; 1/2, n/2) |J(\psi^{-1}(\tau^*))| \prod_{l=1}^L \prod_{k=1}^q p(\mathbf{y}_k | \mathbf{X}, \gamma_{lk}, \tau^*)^{1/t_{lk}} \frac{Q(\psi^*, \psi)}{Q(\psi, \psi^*)}}{Ga(\tau; 1/2, n/2) |J(\psi^{-1}(\tau))| \prod_{l=1}^L \prod_{k=1}^q p(\mathbf{y}_k | \mathbf{X}, \gamma_{lk}, \tau)^{1/t_{lk}}}$$

where  $\psi = \log(\tau)$ ,  $J(\psi^{-1}(\tau))$  is the Jacobian of the inverse transformation evaluated in  $\tau$ ,  $Ga(\cdot)$  is the gamma density function and  $Q(\psi, \cdot) = \phi(\psi, 1)$ . As in (S.4), the prior density is not tempered since we are sampling a common value across the  $q$  regressions and the  $L$  chains. The

rational of this choice, for a given  $k$ , is illustrated in detail in Bottolo and Richardson (2010).

### S.2.5 Temperature placement

During the burn-in, for each regression equation  $k$ , we automatically tune the temperature ladder in order to reach a specified acceptance rate of the exchange operator. In particular we chose as temperature ladder the geometric scale, such that the ratio of two consecutive temperatures is constant,  $t_{(l+1)k}/t_{lk} = r_k$ . Then after batch  $b$ th, say 100 sweeps, we update  $r_k$  as follows:  $r_k(b+1) = r_k(b) \pm \delta_r$ , where we add (subtract) to the current values  $r_k(b)$  the quantity  $\delta_r$  if the acceptance frequency of the exchange operator are higher (lower) than the optimal acceptance rate (0.50). For details on how to fix the value of  $\delta_r$  interested reader can refer to Bottolo and Richardson (2010). For a discussion of different temperature scales, see Atchadé et al. (2010).

## S.3 Post-processing

For a fixed  $k$ ,

$$p(\boldsymbol{\gamma}_k^{(t)} | \mathbf{y}_k) = \frac{1}{S} \sum_{s=1}^S p(\mathbf{y}_k | \mathbf{X}, \boldsymbol{\gamma}_k^{(t)}, \tau^{(s)}) p(\tau^{(s)}) \prod_{j=1}^p p(\gamma_{kj}^{(t)} | \omega_{kj}^{(s)}) p(\rho_j^{(s)})$$

is the model posterior probability for the  $k$ th regression, where  $\boldsymbol{\gamma}_k^{(t)} = (\gamma_{k1}^{(t)}, \dots, \gamma_{kq}^{(t)})^T$  is latent binary vector recorded at the  $t$ th sweep of the algorithm,  $p(\mathbf{y}_k | \mathbf{X}, \boldsymbol{\gamma}_k^{(t)}, \tau^{(s)})$  is the marginal likelihood and  $\tau^{(s)}$ ,  $\omega_{kj}^{(s)} = \omega_k^{(s)} \times \rho_j^{(s)}$  and  $\rho_j^{(s)}$  are the values of the parameters recorded at the  $s$ th sweep.

When the  $q$  regressions are jointly considered, the configuration posterior probability is de-



defined as

$$p(\Gamma^{(t)}|\mathbf{Y}) = \frac{1}{S} \sum_{s=1}^S p(\tau^{(s)}) \prod_{k=1}^q p(\mathbf{y}_k|\mathbf{X}, \boldsymbol{\gamma}_k^{(t)}, \tau^{(s)}) p(\omega_k^{(s)}) \prod_{j=1}^p p(\gamma_{kj}^{(t)}|\omega_{kj}^{(s)}) p(\rho_j^{(s)})$$

with  $\Gamma^{(t)}$  the configuration of the latent binary matrix at sweep  $t$ th.

## Further literature cited

Atchadé, Y. F., G. O. Roberts and J. S. Rosenthal (2010). Towards optimal scaling of metropolis-coupled markov chain monte carlo. *Stat. Comput.*. To appear.

Bottolo, L. and S. Richardson (2010). Evolutionary Stochastic Search for Bayesian model exploration. *Bayesian Analysis* 5, 583–618.

Kohn, R., M. Smith and D. Chan (2001). Nonparametric regression using linear combinations of basis functions. *Stat. Comput.* 11, 313–322.

Liang, F. and W. H. Wong (2000). Evolutionary Monte Carlo: application to  $C_p$  model sampling and change point problem. *Stat. Sinica* 10, 317–342.

Richardson, S., L. Bottolo and J. S. Rosenthal (2011). Bayesian models for sparse regression analysis of high dimensional data (with discussion). In J. M. Bernardo, M. J. Bayarri, J. O. Berger, A. Dawid, D. Heckerman, A. F. M. Smith, and M. West (Eds.), *Bayesian Statistics: Proc. 9th Int. Meeting*. Oxford University Press.

Roberts, G. O. and J. S. Rosenthal (2009). Examples of adaptive MCMC. *J. Comput. Graph. Stat.* 9, 349–367.

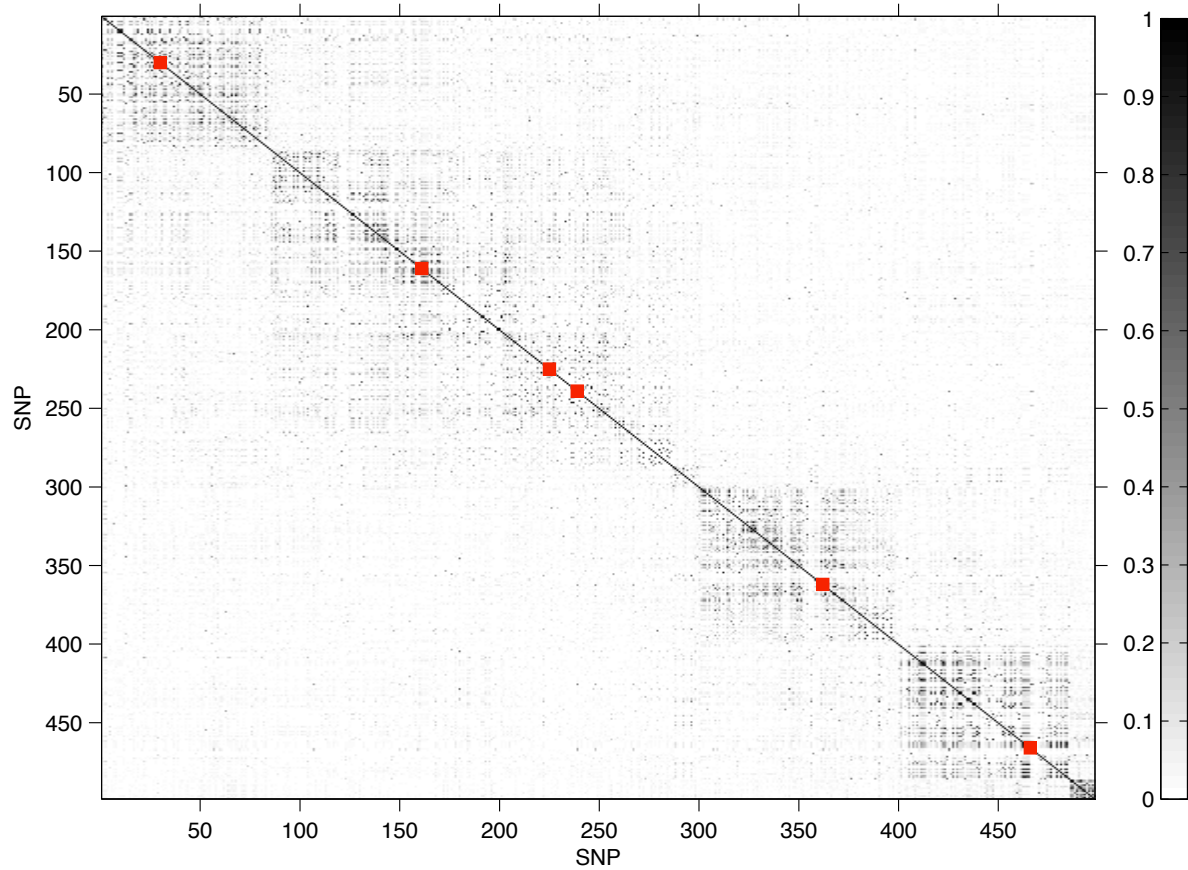

Figure S.1: Heat-map of the pattern of correlation, linkage disequilibrium (LD) for Yoruba population, HapMap project, in the region ENm014 spanning 500-Kb (chrom 7: 126,368,183-126,865,324 bp). Red squares indicate the marker where the hot-spots have been simulated (SNP 30, 161, 225, 239, 362 and 466).

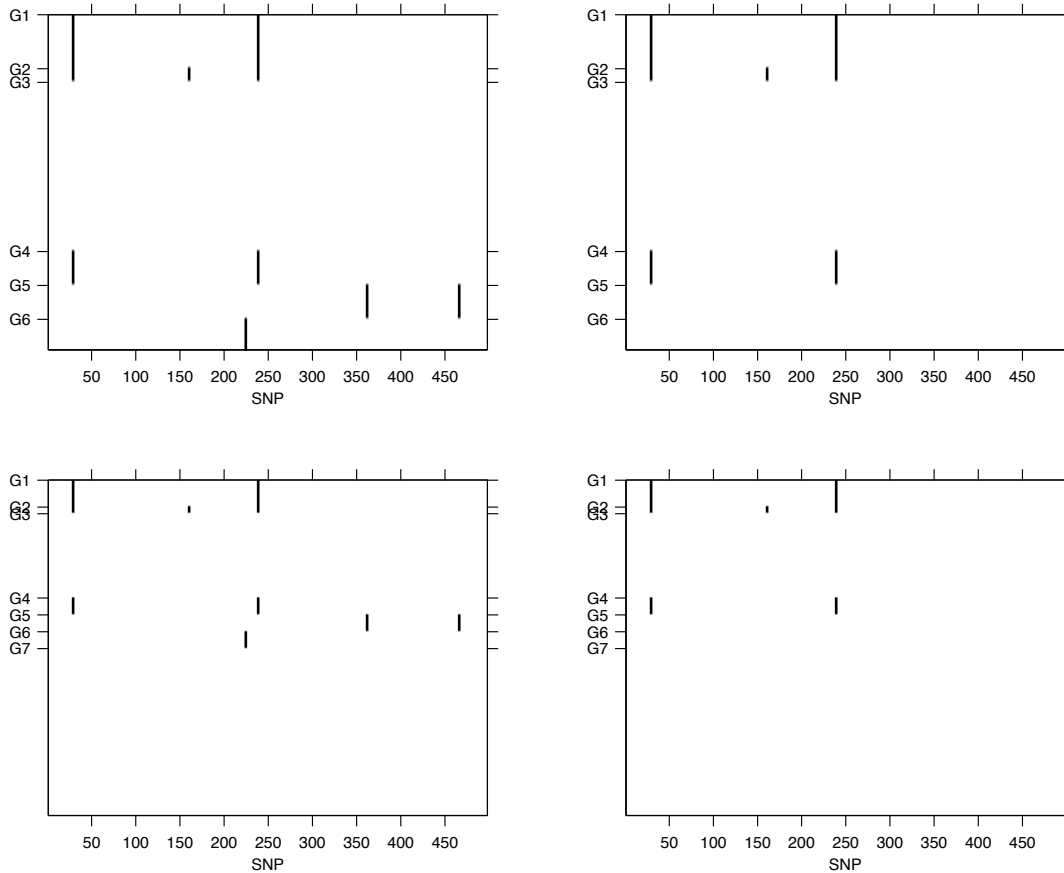

Figure S.2: Map configuration in the four simulated scenarios. From top to bottom, left to right: SIM1, SIM2, SIM3 and SIM4. SIM1,  $q = 100$  transcripts simulated with SNP 30 and 239 influencing transcripts 1-20 and 71-80, SNP 161 influencing transcripts 17-20, SNP 225 influencing transcripts 91-100, and finally eQTLs 362 and 466 influencing transcripts 81-90. Altogether 94 transcript-SNP associations are simulated in 50 distinct transcripts; SIM2, 100 responses simulated with only three hot spots (30, 161, 239) and the same simulated pattern of association as in the first scenario leading to 64 transcript-SNP associations in 30 distinct transcripts; SIM3, the simulation set-up is identical to the first scenario for the first 100 responses, but the number of simulated responses is increased to  $q = 1,000$ , simulating further 900 transcripts from the noise; SIM4, as in the second simulated data set for the first 100 responses, with additional 900 responses simulated from the noise, and altogether  $q = 1,000$ . The symbol ‘G’ in the  $y$ -axis identifies groups of transcripts that are influenced by the same pattern of markers. SIM1 and SIM2,  $G_1$ : transcripts 1-16;  $G_2$ : transcripts 17-20;  $G_3$ : 21-70;  $G_4$ : transcripts 71-80;  $G_5$ : transcripts 81-90;  $G_6$ : transcripts 91-100. SIM3 and SIM4 as before with  $G_7$ : transcripts 101-1000.

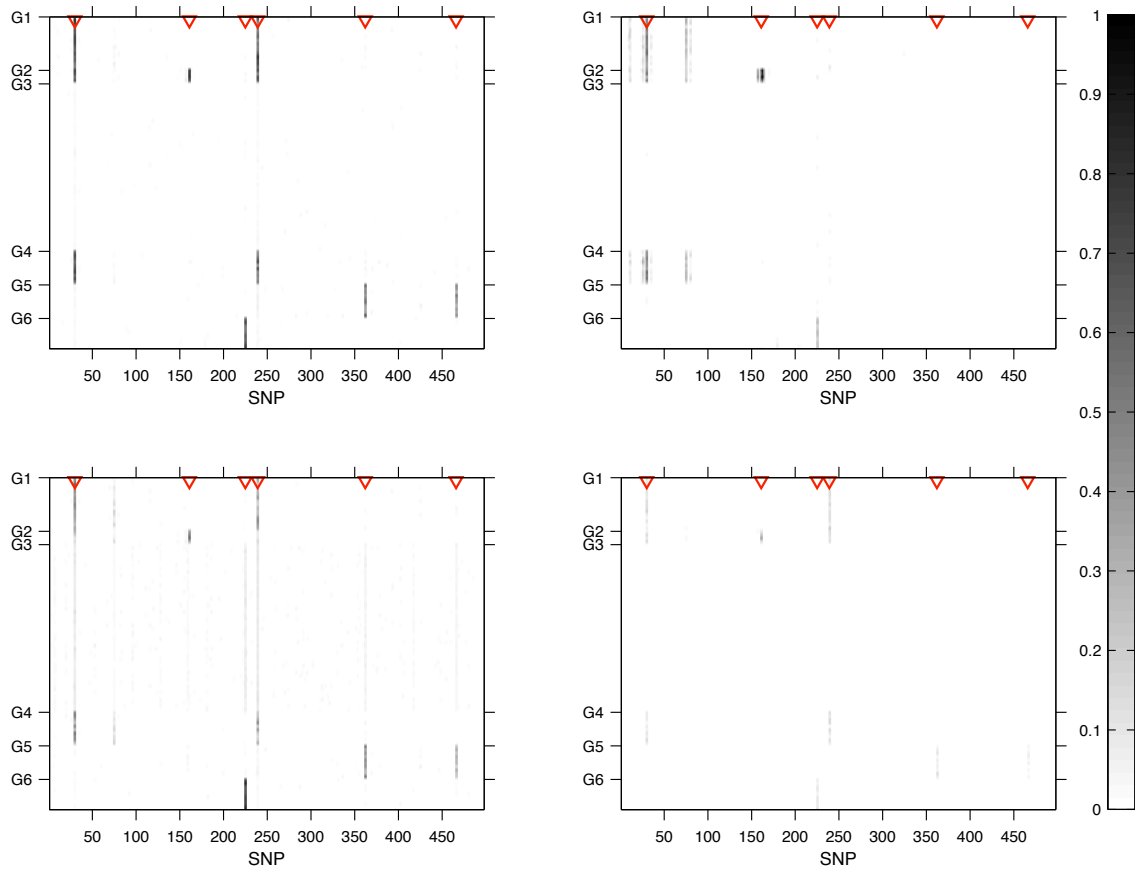

Figure S.3: Heat-map of the signals detected by each method in the first simulated example, SIM1, and averaged across the 25 replicates. In M-SPLS the significant (non-significant) transcript-marker association is recoded as 1 (0). From top to bottom, left to right: HESS, M-SPLS, MOM and BAYES. The symbol ‘G’ in the *y*-axis identifies groups of transcripts that are influenced by the same pattern of markers. Red triangles indicate where the hot-spots have been simulated.

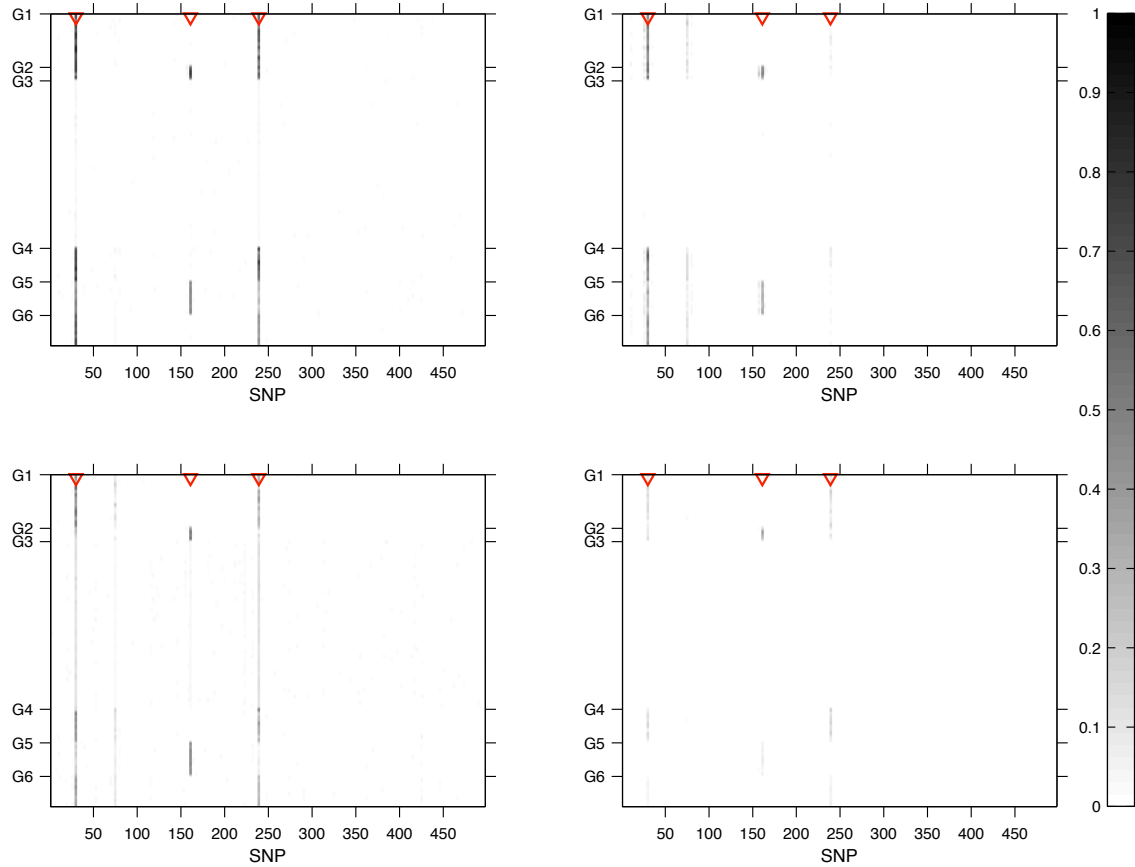

Figure S.4: Heat-map of the signals detected by each method in the second simulated example, SIM2, and averaged across the 25 replicates. In M-SPLS the significant (non-significant) transcript-marker association is recoded as 1 (0). From top to bottom, left to right: HESS, M-SPLS, MOM and BAYES. The symbol ‘G’ in the  $y$ -axis identifies groups of transcripts that are influenced by the same pattern of markers. Red triangles indicate where the hot-spots have been simulated.

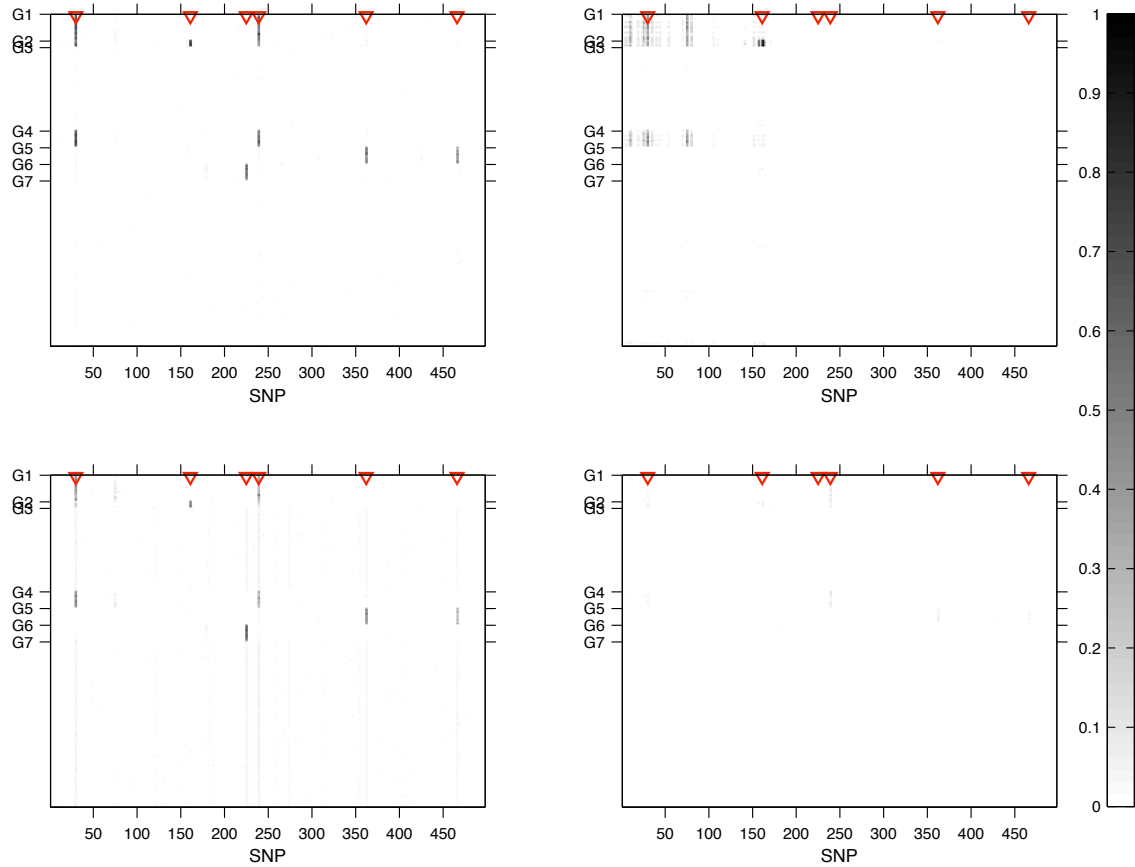

Figure S.5: Heat-map of the signals detected by each method in the third simulated example, SIM3, and averaged across the 25 replicates. In M-SPLS the significant (non-significant) transcript-marker association is recoded as 1 (0). From top to bottom, left to right: HESS, M-SPLS, MOM and BAYES. The symbol ‘G’ in the  $y$ -axis identifies groups of transcripts that are influenced by the same pattern of markers. Red triangles indicate where the hot-spots have been simulated.

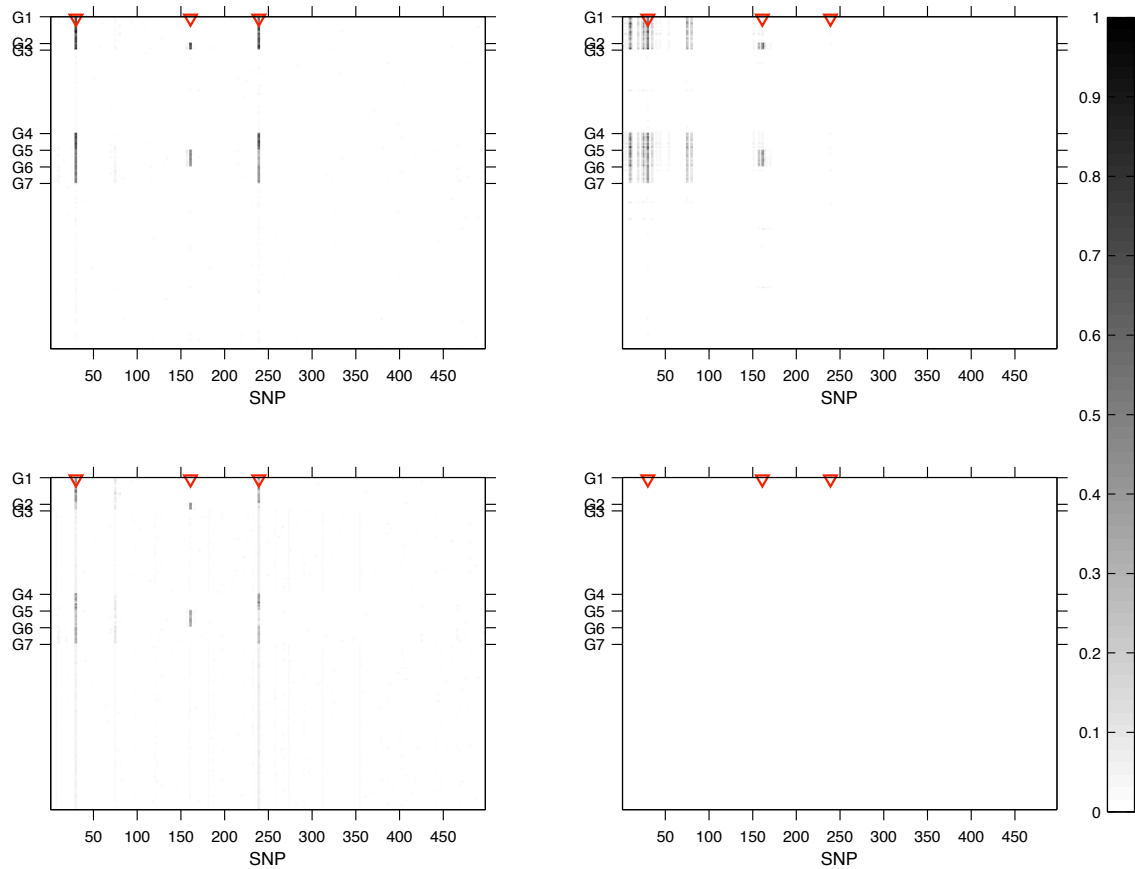

Figure S.6: Heat-map of the signals detected by each method in the fourth simulated example, SIM4, and averaged across the 25 replicates. In M-SPLS the significant (non-significant) transcript-marker association is recoded as 1 (0). From top to bottom, left to right: HESS, M-SPLS, MOM and BAYES. The symbol ‘G’ in the  $y$ -axis identifies groups of transcripts that are influenced by the same pattern of markers. Red triangles indicate where the hot-spots have been simulated.

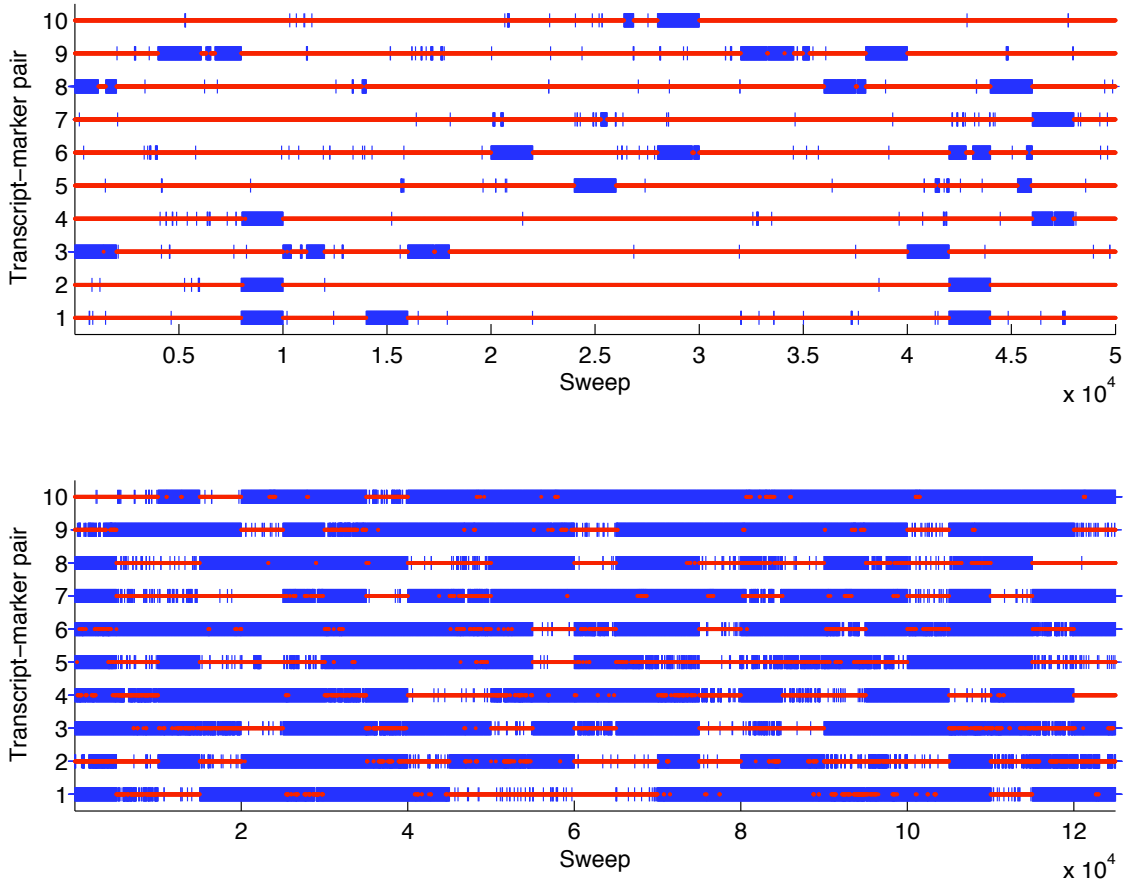

Figure S.7: Trace plot of the latent binary values obtained from BAYES (top) and HESS (bottom) in SIM1 for the 10 true positive associations simulated in the third hot-spot ( $j = 225, k = 91, \dots, 100$ ). For the 25 replicates, the output ( $\gamma_{kj}$ ) of each algorithm was piled up giving rise to a vector of 50,000 ( $2,000 \times 25$ ) and 125,000 ( $5,000 \times 25$ ) sweeps, respectively. Red dot and blue cross indicate  $\gamma_{kj} = 0$  and  $\gamma_{kj} = 1$ , respectively. HESS correctly identifies the 10 transcript-marker associations as indicated by a large majority of blue crosses. Good MCMC mixing is clear from the sequence of blue crosses interrupted by red dots and *vice versa*. On the contrary, BAYES misses the simulated associations (false negative) and gets stuck in  $\gamma_{kj} = 0$  producing long stripes of consecutive red dots. Overall, the different efficiency in the MCMC mixing between BAYES and HESS is apparent from the diverse coloured stripe patterns.



### **Tables S1-S3**

Tables S1-S3 are available for download at  
<http://www.genetics.org/cgi/content/full/genetics.111.131425/DC1> as Excel files.

File S2  
Supporting Data

File S2 is available for download at  
<http://www.genetics.org/cgi/content/full/genetics.111.131425/DC1> as a compressed folder and contains the simulated data sets and Matlab script used to simulate data.
