# Supplementary material for: Bayesian Detection of Expression Quantitative Trait Loci Hot Spots
Source: Oxford University Press journal article supplement (doi:10.1534/genetics.111.131425), 2011-09-17
Supplement: figures1.pdf [file figures1.pdf]

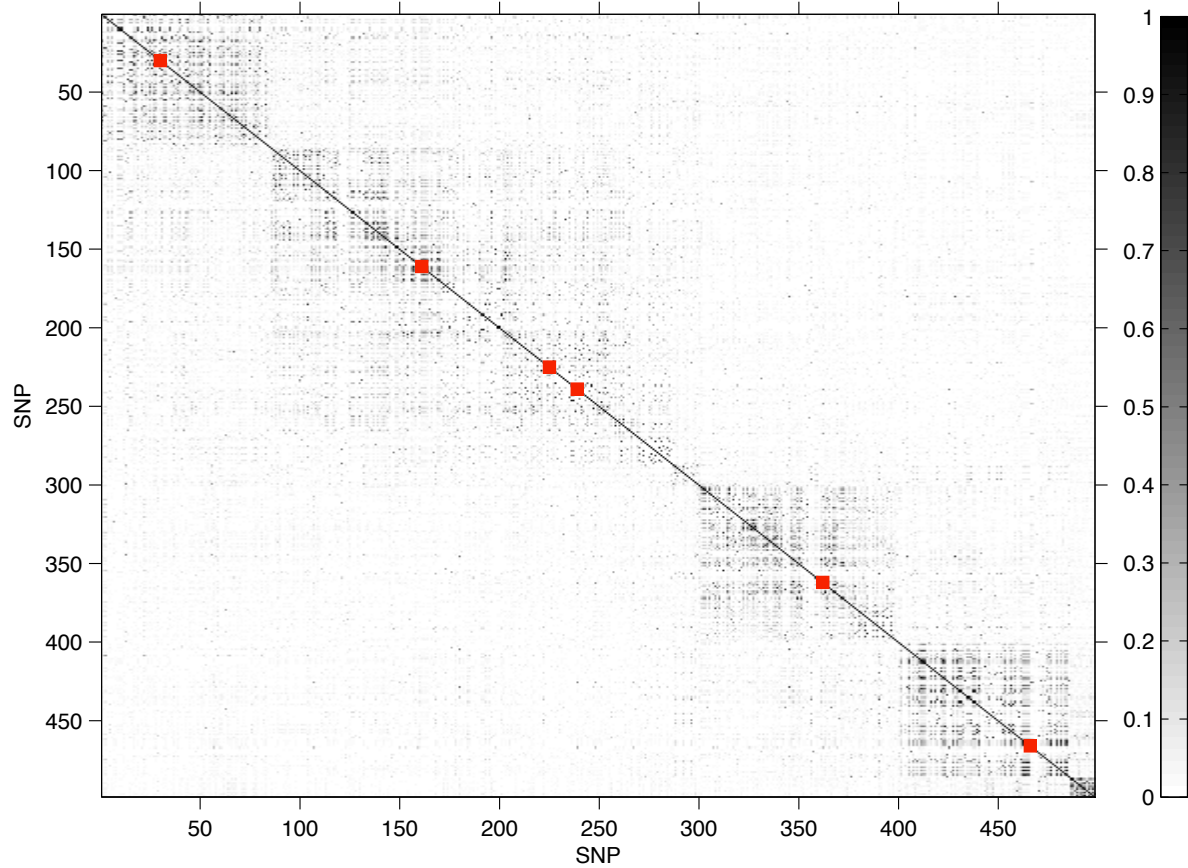

Figure S.1: Heat-map of the pattern of correlation, linkage disequilibrium (LD) for Yoruba population, HapMap project, in the region ENm014 spanning 500-Kb (chrom 7: 126,368,183-126,865,324 bp). Red squares indicate the marker where the hot-spots have been simulated (SNP 30, 161, 225, 239, 362 and 466).
