# Supplementary material for: Bayesian Detection of Expression Quantitative Trait Loci Hot Spots
Source: Oxford University Press journal article supplement (doi:10.1534/genetics.111.131425), 2011-09-17
Supplement: figures3.pdf [file figures3.pdf]

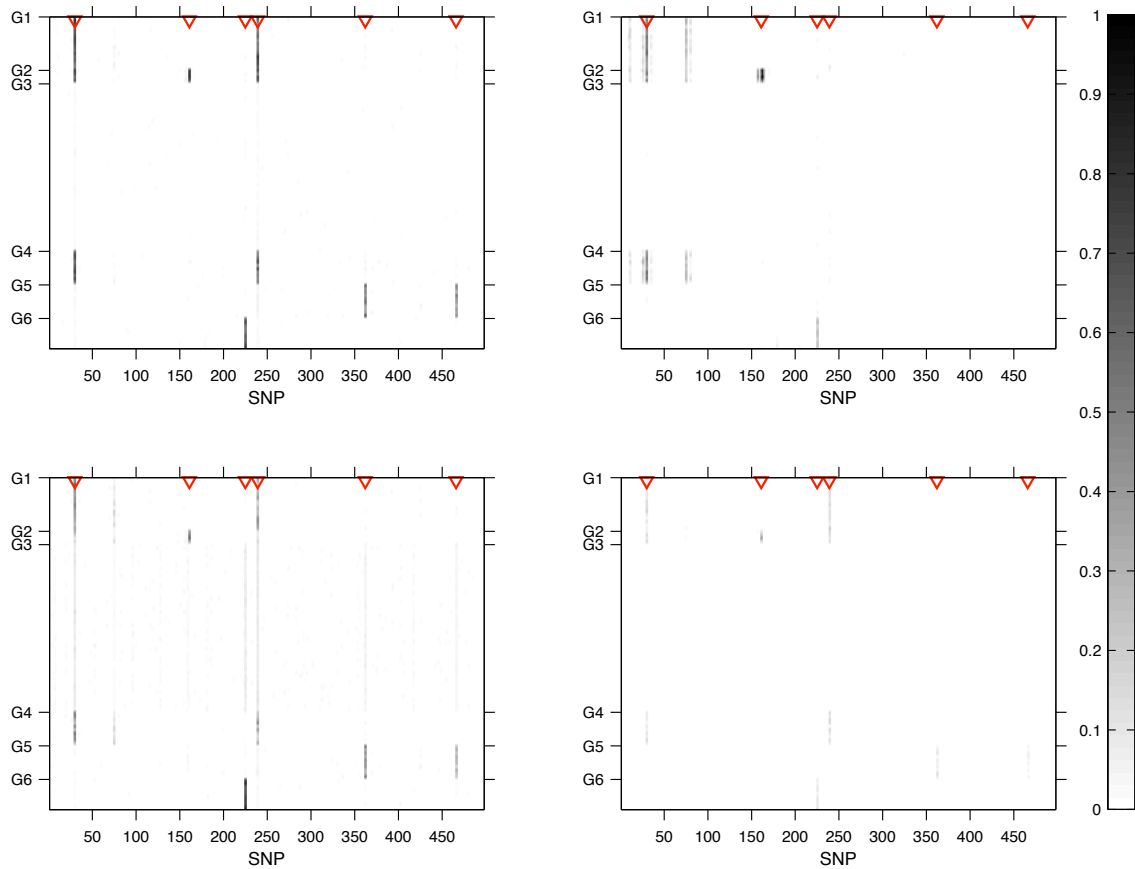

Figure S.3: Heat-map of the signals detected by each method in the first simulated example, SIM1, and averaged across the 25 replicates. In M-SPLS the significant (non-significant) transcript-marker association is recoded as 1 (0). From top to bottom, left to right: HESS, M-SPLS, MOM and BAYES. The symbol ‘G’ in the *y*-axis identifies groups of transcripts that are influenced by the same pattern of markers. Red triangles indicate where the hot-spots have been simulated.
