# Supplementary material for: Bayesian Detection of Expression Quantitative Trait Loci Hot Spots
Source: Oxford University Press journal article supplement (doi:10.1534/genetics.111.131425), 2011-09-17
Supplement: figures7.pdf [file figures7.pdf]

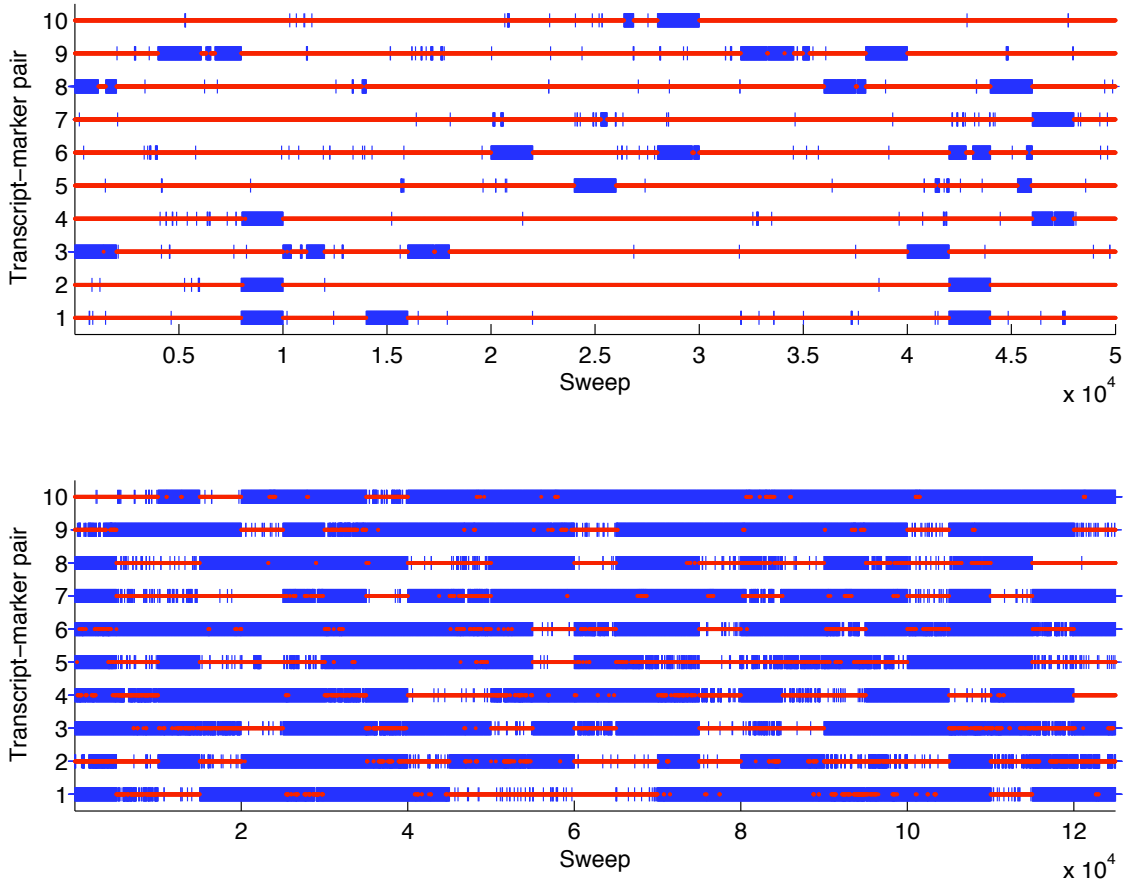

Figure S.7: Trace plot of the latent binary values obtained from BAYES (top) and HESS (bottom) in SIM1 for the 10 true positive associations simulated in the third hot-spot ( $j = 225, k = 91, \dots, 100$ ). For the 25 replicates, the output ( $\gamma_{kj}$ ) of each algorithm was piled up giving rise to a vector of 50,000 ( $2,000 \times 25$ ) and 125,000 ( $5,000 \times 25$ ) sweeps, respectively. Red dot and blue cross indicate  $\gamma_{kj} = 0$  and  $\gamma_{kj} = 1$ , respectively. HESS correctly identifies the 10 transcript-marker associations as indicated by a large majority of blue crosses. Good MCMC mixing is clear from the sequence of blue crosses interrupted by red dots and *vice versa*. On the contrary, BAYES misses the simulated associations (false negative) and gets stuck in  $\gamma_{kj} = 0$  producing long stripes of consecutive red dots. Overall, the different efficiency in the MCMC mixing between BAYES and HESS is apparent from the diverse coloured stripe patterns.
