# Supplementary material for: Bayesian Detection of Expression Quantitative Trait Loci Hot Spots
Source: Oxford University Press journal article supplement (doi:10.1534/genetics.111.131425), 2011-09-17
Supplement: tables1.xlsx [file tables1.xlsx]

## Sheet: Sheet1
Table S1 Detailed results for the marginal posterior probabilities of inclusion for the 16 hot-spots identified. For each hot-spot (genetic marker) we report the posterior tail probability, and for each of the analyzed probe set (p = 1,573) the marginal posterior probabilities of inclusion. Raw microarray data are publicly available at GEO (http://www.ncbi.nlm.nih.gov/geo , GEO Assession GSE3330)
		Hot-spot (genetic marker)	D3Mit19	D4Mit149	D4Mit2	D4Mit237	D4Mit186	D5Mit240	D9Mit249	D13Mit16	D13Mit91	D13Mit66	D13Mit36	D15Mit63	D15Mit107	D18Mit202	D18Mit9	D18Mit103
		Posterior tail probability	1	0.909	0.852	1	1	0.994	1	1	1	0.9266	1	1	0.9897	1	1	0.8448
Probe set ID	Gene Symbol	Gene description	Marginal posterior probability of inclusion
1415692_s_at	Canx	calnexin	0.817511	0.00182608	0.00580243	0.321815	0.316951	0.000276606	0.000589334	0.0605936	0.872244	0.000254372	0.0385341	0.408467	0.0106889	0.184345	0.252666	0.000325048
1415700_a_at	SSR3	signal sequence receptor, gamma	0.196231	0.000470593	0.00663925	0.163122	0.347771	0.000234094	0.00143852	0.00907272	0.148863	0.00132966	0.0203668	0.0322597	0.00153225	0.0143865	0.0387528	0.00079401
1415723_at	LOC100047658	similar to Eukaryotic translation initiation factor 5; eukaryotic translation initiation factor 5	0.200598	0.000347904	0.00267159	0.194981	0.106404	0.00165961	0.00449452	0.00648918	0.292187	0.000403706	0.03834	0.500655	0.00439346	0.275594	0.820702	0.0194597
1415724_a_at	Cdc42	cell division cycle 42 homolog (S. cerevisiae); predicted gene 7407	0.0556281	0.000242665	0.0069765	0.0630701	0.0160265	0.00605243	0.00111839	0.00514849	0.219457	0.000476548	0.0207691	0.142828	0.00298738	0.0114022	0.0372155	0.000904981
1415760_s_at	atox1	ATX1 (antioxidant protein 1) homolog 1 (yeast)	0.0229561	0.00398151	0.00183492	0.0870414	0.0135767	0.0138298	0.0054455	0.0047109	0.020317	0.000755714	0.0133342	0.0299402	0.00280934	0.0198633	0.0363325	0.00106707
1415771_at	ncl	nucleolin	0.778313	0.00355216	0.00291977	0.999864	0.0710243	0.00631829	0.0172116	0.652721	0.999964	0.00661321	0.513273	0.99934	0.00501216	0.99774	0.990279	0.0155511
1415773_at	ncl	nucleolin	0.602921	0.00235689	0.00267639	0.840113	0.241765	0.000137141	0.015078	0.0612722	0.979045	0.000263444	0.0585339	0.653957	0.0447821	0.719106	0.918898	0.000374809
1415776_at	aldh3a2	aldehyde dehydrogenase family 3, subfamily A2	0.0367254	8.5107e-08	7.53805e-07	0.0306061	0.00459697	0.00118649	0.00132366	0.00500352	0.0163417	0.000507733	0.00660327	0.0234128	0.00172392	0.00961662	0.0148184	0.000770061
1415779_s_at	Actg-ps1	predicted gene 8543; actin-like 8; predicted gene 7505; predicted gene 12715; predicted gene 12003; predicted gene 8399; predicted gene 6375; actin, gamma, cytoplasmic 1; similar to gamma-actin; predicted gene 4667; similar to cytoplasmic beta-actin; predicted gene 16385	0.0157343	0.00330155	0.000644995	0.011174	0.00525101	0.00604718	0.0115829	0.00414562	0.011218	0.000589126	0.0140341	0.011251	0.000734832	0.0151556	0.108347	0.00316988
1415802_at	SLC16A1	solute carrier family 16 (monocarboxylic acid transporters), member 1	0.0116202	0.0754777	0.0105214	0.121173	0.0104908	0.00099183	0.00103809	0.00355565	0.0122887	0.00124383	0.00977721	0.0132522	0.0025165	0.0147507	0.0146933	0.000717758
1415822_at	Scd2	stearoyl-Coenzyme A desaturase 2	0.0109914	0.00751043	0.00260588	0.113012	0.0107713	0.0111958	0.00656819	0.00339506	0.011691	0.000514545	0.00692659	0.0158685	0.000790081	0.0105642	0.0142139	0.000607816
1415827_a_at	serp1	stress-associated endoplasmic reticulum protein 1	0.622206	0.0108899	0.000214444	0.20705	0.862778	0.00303187	0.00187498	0.00961382	0.95365	0.00178889	0.0512865	0.72893	0.0134994	0.361624	0.886275	0.011935
1415834_at	dusp6	dual specificity phosphatase 6	0.022458	0.000587262	3.43458e-06	0.0113553	0.00504558	0.00507416	0.00485891	0.0034033	0.0114092	0.000772045	0.00719717	0.013353	1.81587e-05	0.0212785	0.0615115	0.0020884
1415838_at	SERINC1	serine incorporator 1	0.995688	0.00364274	0.00324921	0.954528	0.155734	0.0103036	0.00622556	0.118258	0.999948	0.00486474	0.258746	0.953525	0.0649774	0.982456	0.99063	0.00995645
1415839_a_at	LOC100046628	predicted gene 6477; predicted gene 9118; nucleophosmin 1; similar to Nucleophosmin (NPM) (Nucleolar phosphoprotein B23) (Numatrin) (Nucleolar protein NO38); predicted gene 7289; predicted gene 5611	0.568457	0.00214464	0.000951276	0.999886	0.0336701	0.00610225	0.0106738	0.195849	0.953157	0.00236507	0.306005	0.999294	0.00229295	0.77029	0.84506	0.00194165
1415840_at	Elovl5	ELOVL family member 5, elongation of long chain fatty acids (yeast)	0.0365824	0.00332022	0.000643193	0.0228622	0.00550511	0.0769949	0.00553109	0.00594086	0.0361861	0.000560051	0.00946559	0.587049	0.0100226	0.0144555	0.0296617	4.10192e-05
1415863_at	EIF4G2	eukaryotic translation initiation factor 4, gamma 2	0.301002	7.20933e-07	0.00428221	0.167335	0.190044	1.86106e-05	0.000930794	0.00490511	0.433743	4.29202e-05	0.0343091	0.239945	0.0272505	0.0406806	0.0610829	0.000106091
1415883_a_at	LOC638418	similar to elastase 3B, pancreatic; predicted gene 13011; chymotrypsin-like elastase family, member 3B	0.0390763	0.000543731	0.000506305	0.0101482	0.00425331	0.00252315	0.00255846	0.00385694	0.014039	0.000738397	0.00796189	0.0106469	0.00139447	0.0118712	0.0104929	0.000556562
1415889_a_at	Hsp90b1	heat shock protein 90, beta (Grp94), member 1	0.991078	0.00431502	0.00524416	0.981073	0.167101	0.00600523	0.00795006	0.429957	0.997862	0.00506656	0.697284	0.997098	0.0059771	0.965181	0.993452	0.00629461
1415899_at	junb	Jun-B oncogene	0.0120881	0.027972	0.00236081	0.0143501	0.0045578	1.18482e-06	0.0641043	0.0102402	0.0208588	0.000465711	0.00930678	0.0226657	0.000216892	0.194649	0.0971974	0.00708645
1415906_at	LOC100047211	thymosin, beta 4, X chromosome; similar to thymosin beta-4	0.0172531	0.000893756	0.000660015	0.0157174	0.0133162	0.000415478	0.0329167	0.00432365	0.0434764	0.00281265	0.0122772	0.772561	0.00846792	0.0210105	0.0263713	0.000924018
1415943_at	sdc1	syndecan 1	0.0143386	0.00396012	0.000554653	0.0364412	0.0151773	0.00281446	0.0189544	0.00635106	0.0156919	1.30467e-07	0.00979854	0.167952	0.351772	0.0158357	0.0141352	0.000396174
1415954_at	PRSS1	protease, serine, 1 (trypsin 1)	0.0387194	0.000544852	0.000505776	0.0100866	0.00413467	0.00147799	0.00221839	0.00646703	0.0277996	0.00120267	0.00721369	0.011181	0.00372023	0.0109939	0.0108989	0.00059293
1415964_at	Scd1	stearoyl-Coenzyme A desaturase 1	0.0232683	0.000662454	0.000551622	0.0277154	0.0140612	0.0324774	0.00858751	0.00307313	0.0293904	0.00201757	0.0118101	0.126135	9.4411e-05	0.0127827	0.011378	0.000493712
1415965_at	Scd1	stearoyl-Coenzyme A desaturase 1	0.0488032	0.000867121	0.00128341	0.357119	0.0235874	0.231048	0.0176135	0.00683644	0.103751	0.00163198	0.0184988	0.529407	0.00360216	0.0212232	0.0255359	6.76368e-06
1415970_at	Gm16399	predicted gene 6265; similar to cytochrome c oxidase, subunit VIc; cytochrome c oxidase, subunit VIc	0.040748	2.49785e-06	0.000687443	0.0164821	0.0242095	0.000862212	0.000177867	0.00686886	0.114854	0.000737001	0.0289881	0.102448	0.00211092	0.113951	0.237706	0.00926001
1415971_at	MARCKS	myristoylated alanine rich protein kinase C substrate	0.0243819	0.000179769	0.000436701	0.0457949	0.00650831	0.0070597	0.0505646	0.0135225	0.722516	0.00419415	0.0276587	0.421314	0.0612138	0.0287402	0.140718	0.00217117
1415993_at	sqlE	squalene epoxidase	0.0108186	0.000854382	4.91874e-06	0.0518119	0.0088586	6.73536e-06	0.00192699	0.00333192	0.0107958	0.00051844	0.00682889	0.012605	0.000950368	0.0198121	0.010152	0.000562987
1415996_at	TXNIP	thioredoxin interacting protein	0.0149887	0.000580104	5.28713e-11	0.0116911	0.00535981	0	3.26563e-07	0.00445268	0.0142124	0.00137633	0.0136071	0.0125969	0.000938037	0.01218	0.0115998	0
1415997_at	TXNIP	thioredoxin interacting protein	0.012458	0.00110719	0.00156468	0.0115219	0.00473275	0.00197682	0.000960802	0.00413301	0.0109614	0.000469653	0.00599259	0.0496643	0.00267539	0.0187826	0.011444	0
1416010_a_at	EHD1	EH-domain containing 1	0.0135271	0.00237192	0.00104291	0.0294499	0.0712241	0.00144162	0.000175296	0.00310762	0.0296291	0.000478327	0.00746739	0.0245682	0.0100593	0.0148223	0.0314337	0.00025829
1416021_a_at	Fabp5	fatty acid binding protein 5, epidermal	0.0194867	0.000701921	0.000868094	0.0198789	0.0087977	0.00440896	0.0137447	0.00451226	0.0196519	0.000589068	0.0102346	0.342411	0.0164841	0.0151198	0.013647	0.000264663
1416022_at	Fabp5	fatty acid binding protein 5, epidermal	0.0161021	0.000676309	0.000652484	0.0271492	0.0109109	0.000818047	0.0167502	0.00466063	0.0224332	0.00123245	0.0126148	0.353552	0.0123052	0.017499	0.0142018	0.00049589
1416029_at	KLF10	Kruppel-like factor 10	0.0127896	0.00121448	0.000630547	0.0263627	0.00619012	0.00133539	0.00100239	0.00296516	0.0168916	0.00132455	0.0141841	0.0147527	0.000934904	0.0160538	0.00953743	0.000530954
1416041_at	SGK1	serum/glucocorticoid regulated kinase 1	0.00945455	0.000527545	0.000571572	0.00956292	0.00958582	0.00094326	0.00212038	0.00307196	0.0099787	0.00149809	0.0128389	0.0107064	0.00304293	0.0125277	0.0197943	0.000985476
1416049_at	Gldc	glycine decarboxylase	0.0146798	0.000744913	0.0010706	0.0251081	0.00704759	0.000616764	0.00252437	0.00305616	0.0116456	3.92989e-06	0.00918591	0.04851	0.0503711	0.011608	0.0106522	0.000525217
1416060_at	TBC1D15	TBC1 domain family, member 15	0.468774	0.00100815	0.000615617	0.615028	0.16413	0.000154349	0.00211513	0.0226378	0.832418	0.00236766	0.142097	0.949074	0.0020846	0.541885	0.711492	0.0128876
1416064_a_at	HSPA5	heat shock protein 5	0.0240712	0.00249442	0.000487913	0.00934439	0.00474884	0	0.00131131	0.0028683	0.00985492	0.000466892	0.00700513	0.0168616	0.0011179	0.00920867	0.00993764	0.000516759
1416066_at	CD9	CD9 antigen	0.012528	0.000762787	0.000572559	0.0106266	0.00392192	0.00158904	0.0290835	0.00335069	0.0118242	0.000481764	0.00696907	0.0141519	0.00218468	0.0114789	0.0109912	0.000556092
1416094_at	Adam9	a disintegrin and metallopeptidase domain 9 (meltrin gamma)	0.997942	0.00665443	0.0124517	0.356449	0.995696	0.00887211	0.0131519	0.544913	0.998978	0.00425912	0.97687	0.970639	0.0102408	0.999999	0.992313	0.0158979
1416101_a_at	Hist1h1c	histone cluster 1, H1c	0.0119122	1.86251e-05	0.000667301	0.0173579	0.0072254	0.00066128	0.00395791	0.0296418	0.05863	0.00439581	0.028656	0.0228779	0.00131955	0.0135837	0.0286369	0.000981612
1416108_a_at	TMED3	transmembrane emp24 domain containing 3	0.0147001	0.0333614	0.0142356	0.0161254	0.00488682	0.0202675	0.00322962	0.00558737	0.0211286	5.82635e-05	0.016635	0.0136446	0.000970396	0.0130685	0.0250334	0.000997711
1416125_at	FKBP5	FK506 binding protein 5	0.0245663	0.00209448	0.0510664	0.274243	0.0266251	0.000635238	0.00127867	0.0034324	0.0124726	0.00058412	0.012518	0.0175745	0.000642367	0.0238486	0.0127706	0.000450388
1416146_at	HSPA4	heat shock protein 4	0.0817733	0.000146182	0.00219878	0.256141	0.048879	0.000154715	0.00100801	0.0221302	0.416128	0.000585316	0.0254158	0.292957	0.00613568	0.0273551	0.152475	0.000896238
1416153_at	Srp54a	signal recognition particle 54b; signal recognition particle 54a; signal recognition particle 54C	0.852441	0.00603549	0.0034699	0.986657	0.321898	0.00402429	0.00795785	0.141755	0.994309	0.00718906	0.140318	0.998207	0.00479713	0.997523	0.997151	0.00568333
1416176_at	LOC674543	predicted gene 13121; predicted gene 3160; high-mobility group (nonhistone chromosomal) protein 1-like 1; predicted gene 6090; predicted gene 3851; predicted gene 8967; predicted gene 7782; predicted gene 4587; predicted gene 4689; predicted gene 3307; predicted gene 13932; predicted gene 15059; predicted gene 3565; predicted gene 15447; predicted gene 12587; predicted gene 9012; predicted gene 6…	0.994292	0.00549672	0.00582935	0.99875	0.127805	0.00584108	0.0100457	0.68214	1	0.0080763	0.892564	0.988885	0.00894581	1	0.999389	0.00396521
1416179_a_at	rdx	radixin	0.46758	0.00538118	0.000634073	0.0168674	0.00954659	0.000855647	0.00657628	0.00425237	0.0221369	0	0.0201269	0.0625607	0.00107687	0.0190972	0.0262588	4.02759e-05
1416180_a_at	rdx	radixin	0.0978202	0.00644934	0.00371946	0.0441304	0.0249553	0	0.00244215	0.00914228	0.591539	0.00882076	0.0290871	0.0204087	0.000610097	0.054202	0.0576395	0.00089614
1416191_at	SEC61A1	Sec61 alpha 1 subunit (S. cerevisiae)	0.0175556	0.000714183	0.00469916	0.0927003	0.0292753	0.00092896	0.00118731	0.00312023	0.0392875	0.00234145	0.0446927	0.0161354	0.00132707	0.0519682	0.0142962	0.000720946
1416201_at	crk	v-crk sarcoma virus CT10 oncogene homolog (avian)	0.557106	0.00125573	0.0218216	0.592809	0.456493	0.00163381	0.0025269	0.0671483	0.992358	0.000323242	0.0723629	0.57468	0.0147555	0.829296	0.847623	0.0071909
1416229_at	RFK	riboflavin kinase	0.0834962	0.00124067	0.00919892	0.19359	0.137847	0.000232087	0.00114031	0.00387951	0.0950777	0.00211376	0.0388381	0.0220766	0.000590618	0.0604883	0.0221739	7.30698e-05
1416236_a_at	MPZL2	myelin protein zero-like 2	0.0619585	2.31008e-07	3.83234e-06	0.00970423	0.00773289	0.0109615	0.00137055	0.00333946	0.0142041	6.05623e-05	0.00972635	0.0122381	0.000718208	0.0237235	0.0383776	0.00161583
1416246_a_at	Coro1a	coronin, actin binding protein 1A	0.0230958	0.000465388	0.00056653	0.0184476	0.0372905	0.000245992	0.0122736	0.00472828	0.0125754	0.000995858	0.00945684	0.0551408	0.00171833	0.0341568	0.0124303	0.000120813
1416288_at	Gm15542	predicted gene 15542; predicted gene 7816; similar to DnaJ-like protein; predicted gene 6335; DnaJ (Hsp40) homolog, subfamily A, member 1, pseudogene; DnaJ (Hsp40) homolog, subfamily A, member 1	0.999998	0.0929059	0.0429092	0.921824	0.158007	0.00581395	0.0125883	0.598075	0.999995	0.00164785	0.988506	0.989465	0.0187972	0.99332	0.986757	0.0213391
1416308_at	UGDH	UDP-glucose dehydrogenase	0.024459	0.000789819	0.000564529	0.0100614	0.00365747	0.000653734	0	0.00427781	0.0372796	0.00105887	0.00684751	0.0104086	0.000901285	0.0118737	0.021442	0.0010934
1416318_at	Serpinb1a	serine (or cysteine) peptidase inhibitor, clade B, member 1a	0.0185095	0.000374303	0.000533492	0.0212669	0.0137243	0.000889604	0.0480302	0.00397433	0.0227856	0.00121008	0.0160421	0.0396953	0.0020765	0.63082	0.149095	0.0129059
1416337_at	Gm2962	predicted gene 2962; ubiquinol-cytochrome c reductase binding protein	0.52116	0.0172678	0.0300772	0.251884	0.0568373	0.00123314	0.00127782	0.00641206	0.340182	0.00185227	0.0183049	0.0593532	9.08327e-05	0.0517011	0.0559353	0.000371667
1416343_a_at	lamp2	lysosomal-associated membrane protein 2	0.559969	0.00150879	0.00567538	0.110731	0.113625	0.000339962	0.00135775	0.00451867	0.216578	0.000695002	0.013437	0.315975	0.00648413	0.0314174	0.080898	0.00111449
1416366_at	LOC675851	NADH dehydrogenase (ubiquinone) 1, subcomplex unknown, 2; similar to NADH dehydrogenase (ubiquinone) 1, subcomplex unknown, 2	0.0372252	0.00106112	0.000958425	0.0278998	0.0178309	0.00216812	0.00146293	0.0295579	0.101057	0.000913064	0.0138685	0.0541871	0.00119079	0.0232995	0.0606494	0.00284762
1416368_at	GSTA4	glutathione S-transferase, alpha 4	0.0197295	9.8099e-05	4.15031e-05	0.0158413	0.00441012	0.00045971	0.0037456	0.00303321	0.0135312	0	0.00978673	0.261113	0.0143462	0.0809168	0.0280433	7.59209e-06
1416382_at	CTSC	cathepsin C	0.0134019	0.000658947	0.00148535	0.0104384	0.00371952	0.000627589	0.0011539	0.00285859	0.0117992	0.000879432	0.00637422	0.0237834	0.000767062	0.0145816	0.0112117	0
1416386_a_at	M6PR	mannose-6-phosphate receptor, cation dependent	0.0619087	0.00173208	0.0367087	0.783312	0.0693317	0.00381416	0.00392855	0.0108148	0.1977	0.00596682	0.0804703	0.152752	0.00806359	0.378152	0.0570952	0.000816761
1416408_at	ACOX1	acyl-Coenzyme A oxidase 1, palmitoyl	0.0179508	0.000622002	0.0012775	0.0254222	0.00674339	0.00154071	0.00175586	0.00495881	0.0174406	0.00101313	0.020908	0.0427159	0.00187911	0.0184382	0.0175053	0.000691612
1416409_at	ACOX1	acyl-Coenzyme A oxidase 1, palmitoyl	0.012058	0.000532168	0.000621463	0.0208401	0.00615083	0.000725196	0.00120589	0.00328833	0.013524	1.74469e-08	0.00718661	0.0253562	0.00199295	0.0106404	0.00986263	0.00054021
1416411_at	Gm6665	predicted gene 6665; glutathione S-transferase, mu 2	0.128683	0.000523059	0.000496804	0.0140074	0.00663701	0.0101348	0.00125409	0.00298653	0.0172211	0.00226214	0.0324994	0.0115988	0.000888544	0.0124122	0.0112206	0.0005059
1416418_at	GABARAPL1	gamma-aminobutyric acid (GABA) A receptor-associated protein-like 1	0.0173316	0.000852431	0.000620601	0.010771	0.00476349	0.000653682	0.000270673	0.00334283	0.0147642	0	0.00783341	0.0114745	0.00136692	0.190883	0.06291	0.00217931
1416426_at	LOC100046125	RAB5A, member RAS oncogene family; similar to small GTP-binding protein rab5	0.984757	0.00263041	0.00627239	0.477571	0.854872	0.000991382	0.0199008	0.312893	0.988394	0.0067665	0.464754	0.97802	0.0054541	0.953584	0.943225	0.0660165
1416440_at	CD164	CD164 antigen	0.999633	0.00369619	0.00366218	0.953061	0.254287	0.00449522	0.0110108	0.512434	0.997508	0.00348023	0.944667	0.964031	0.039534	0.921797	0.975066	0.0328594
1416443_a_at	SAE1	SUMO1 activating enzyme subunit 1	0.0521214	0.000823135	0.000516113	0.0271336	0.00744704	0.00207259	0.00179885	0.00304597	0.0504908	0.0049153	0.064535	0.0228053	0.00254145	0.103398	0.0264054	0.000297729
1416444_at	Elovl2	elongation of very long chain fatty acids (FEN1/Elo2, SUR4/Elo3, yeast)-like 2	0.0318069	0.00176826	3.42952e-05	0.0144118	0.00411543	0.00147066	0.00218927	0.00504574	0.0491849	2.57635e-07	0.0144568	0.16675	0.00867931	0.0120624	0.017531	0.000119178
1416447_at	TMEM30A	transmembrane protein 30A	0.980326	0.00196119	0.00297125	0.215172	0.574898	0.000598014	0.00514907	0.0515466	0.924309	0.00090789	0.0813216	0.502764	0.0380584	0.619373	0.838145	0.0262426
1416452_at	OAT	ornithine aminotransferase	0.126218	0.000696219	0.000864017	0.0171969	0.00635911	0.0109847	0.778179	0.0141077	0.0210885	0.000778522	0.011259	0.0188465	1.47266e-06	0.0200612	0.0219518	0.000578652
1416472_at	Syap1	synapse associated protein 1	0.916505	0.00782082	0.00336729	0.208853	0.872936	0.00257417	0.010274	0.0417976	0.978567	0.00291658	0.344359	0.97664	0.00148159	0.631172	0.95546	0.0333467
1416509_at	TM9SF3	transmembrane 9 superfamily member 3	0.999362	0.00318529	0.00597093	0.907271	0.354228	0.00171212	0.0172025	0.347735	1	0.0122883	0.931232	0.981256	0.0358731	0.999903	0.98322	0.0301414
1416521_at	SEPW1	selenoprotein W, muscle 1	0.0651738	0.000944206	0.00532579	0.637089	0.0468325	3.97321e-05	0.001034	0.00500445	0.0295128	0.000152362	0.0111371	0.0379608	0.000328476	0.185834	0.283697	0.0261406
1416525_at	SPOP	speckle-type POZ protein	0.494251	0.00343304	0.00586905	0.302594	0.971167	0.000295019	0.00422199	0.140256	0.997774	0.00139673	0.0959733	0.378353	0.0566479	0.98486	0.977859	0.00722447
1416576_at	socs3	suppressor of cytokine signaling 3	0.0228946	0.648222	0.587875	0.0430577	0.0085092	0.000704575	0.00179669	0.0113004	0.0931212	0.00247481	0.0150021	0.0275813	0.00159625	0.0247667	0.0326763	0.00160468
1416593_at	GLRX	glutaredoxin	0.0883959	0.000554163	0.000676261	0.0219179	0.0182152	0.00133029	0.00553119	0.00724755	0.343221	0.597007	0.0847107	0.0229659	0.00131733	0.100781	0.0379234	0.00135079
1416630_at	Id3	inhibitor of DNA binding 3	0.0103933	0.0033909	5.27342e-05	0.0696014	0.00399463	0.00063385	0.00163734	0.00279619	0.00953285	0.000847625	0.00868898	0.0103189	0	0.0100116	0.0109414	0
1416632_at	ME1	predicted gene 7049; similar to NADP-dependent malic enzyme (NADP-ME) (Malic enzyme 1); malic enzyme 1, NADP(+)-dependent, cytosolic	0.21893	0.00636558	0.000945529	0.0632522	0.0338192	0.00169768	3.9977e-05	0.0105996	0.0599257	0.00105427	0.0382021	0.45571	0.00390791	0.0204518	0.0486189	0.000711891
1416659_at	eif3a	eukaryotic translation initiation factor 3, subunit A	0.962965	0.00453994	0.00589424	0.972631	0.716457	0.00700742	0.00804784	0.900541	0.999941	0.0031603	0.884113	0.995446	0.0104477	0.99986	0.97223	0.0530128
1416668_at	ttc35	tetratricopeptide repeat domain 35; predicted gene 5333	0.997119	0.0119544	0.0134724	0.633119	0.745065	0.00348769	0.0163387	0.965617	0.999156	0.0021047	0.947792	0.420518	0.0069534	0.98728	0.993816	0.0100551
1416680_at	Ube3a	ubiquitin protein ligase E3A	0.456446	0.00257976	0.00600798	0.867415	0.0156697	0.00189067	0.00126028	0.013057	0.204737	0.000590689	0.0315756	0.936328	0.00279864	0.0503271	0.214331	0.00338868
1416697_at	DPP4	dipeptidylpeptidase 4	0.275254	0.0139023	0.00637918	0.457528	0.0831494	0.00558972	0.00259559	0.0303076	0.22921	0.000644099	0.0445858	0.27362	0.0338491	0.496126	0.47004	0.000299646
1416698_a_at	Gm6340	predicted gene 10124; predicted gene 6340; CDC28 protein kinase 1b	0.0143784	0.342892	0.00672959	0.0723979	0.0114265	0.00218335	0.000920186	0.00404179	0.0157389	0.000335463	0.014009	0.0390409	0.00428485	0.0332355	0.0140829	1.55101e-05
1416779_at	SDPR	serum deprivation response	0.0989139	0.0708193	0.183624	0.49943	0.0571083	0.00437552	0.00404907	0.0117194	0.101455	0.000450981	0.0131107	0.465888	0.0043348	0.0310479	0.0364739	8.44108e-05
1416794_at	atl2	atlastin GTPase 2	0.220983	0.00762771	0.134701	0.454011	0.110165	0.000342935	0.000700268	0.0053876	0.210974	0.00357224	0.0344065	0.0756099	0.00243767	0.0393531	0.0449629	9.61364e-05
1416808_at	LOC100039744	similar to Nidogen precursor (Entactin); nidogen 1; similar to Nid1 protein	0.0112324	0.000670603	0.00116166	0.0441013	0.00668555	0.0137535	0.0602369	0.00285454	0.0167441	8.85159e-06	0.00900988	0.0687114	0.012364	0.0108552	0.0103879	3.85576e-05
1416816_at	NEK7	NIMA (never in mitosis gene a)-related expressed kinase 7	0.941646	0.00260379	0.00165456	0.199677	0.947797	0.00314996	0.00739499	0.778867	0.991177	0.0134483	0.822872	0.577228	0.0148484	0.865634	0.935595	0.0740153
1416833_at	Keg1	kidney expressed gene 1	0.0165176	0.00241885	0.00582314	0.0477346	0.00550085	0.000974561	0.00551347	0.00294472	0.00989221	6.03912e-06	0.00662744	0.0108527	0.000769869	0.0119963	0.0102722	0
1416840_at	mid1ip1	Mid1 interacting protein 1 (gastrulation specific G12-like (zebrafish))	0.01126	5.46622e-08	0.000622903	0.00994136	0.00530074	1.25432e-05	0.00189284	0.00557418	0.0127775	0.000497459	0.02321	0.0128095	0.0015947	0.00961621	0.0107955	0.000553413
1416849_at	CISD1	CDGSH iron sulfur domain 1	0.0306231	0.00250704	0.000789628	0.0116745	0.00528453	0.000634739	0.00109615	0.00304048	0.0121745	0.000486555	0.010819	0.0152652	0.000767175	0.0619018	0.0132047	0
1416884_at	C7	predicted gene 6917; similar to chromobox homolog 3; predicted gene 5792; predicted gene 7469; predicted gene 6901; predicted gene 7721; predicted gene 5196; complement component 7; chromobox homolog 3 (Drosophila HP1 gamma)	0.578675	0.00419799	0.0020795	0.982427	0.0531141	0.00287373	0.0107278	0.0611855	0.999649	0.00266009	0.614143	0.99505	0.0051426	0.96821	0.977768	0.00697925
1416895_at	EFNA1	ephrin A1	0.0201133	0.0872641	0.0191054	0.458654	0.00983512	0.00142784	0.00133984	0.00561397	0.0134512	0.000431089	0.01019	0.017037	0.000643803	0.0359331	0.0380137	0.00151344
1416904_at	Mbnl1	muscleblind-like 1 (Drosophila)	0.227258	0.00146916	8.17757e-05	0.0835547	0.122417	0.00122476	0.00435635	0.0220146	0.354427	0.000303077	0.134938	0.790349	0.0242111	0.158063	0.684423	0.0828744
1416923_a_at	BNIP3L	similar to NIX; predicted gene 8283; BCL2/adenovirus E1B interacting protein 3-like	0.118362	0.00107937	0.0033793	0.0385991	0.053598	0.00104649	0.0033115	0.00653088	0.220171	0.000389822	0.00977698	0.152722	0.00165854	0.0263596	0.171301	0.00208821
1416926_at	Trp53inp1	transformation related protein 53 inducible nuclear protein 1	0.913896	0.00849329	0.00163348	0.0788748	0.0092502	0.00188177	0.00380393	0.0112425	0.120877	0.00102236	0.0375353	0.2814	0.00258157	0.038992	0.166509	0.00169934
1416930_at	LY6D	lymphocyte antigen 6 complex, locus D	0.0140255	0.0140374	0.00225462	0.0312497	0.00712247	0.00755988	0.00150328	0.00337948	0.0104319	2.82649e-07	0.00855374	0.0118536	0.00228388	0.0654279	0.0198365	0.00144367
1416933_at	por	P450 (cytochrome) oxidoreductase	0.0326753	0.0318285	0.00958734	0.0329809	0.00384603	0.0053078	0.00124353	0.00303339	0.00965349	0.000473158	0.00654893	0.0274772	0.00298757	0.0157294	0.0103084	0.000521784
1416946_a_at	Acaa1a	acetyl-Coenzyme A acyltransferase 1A	0.0214581	0.000551292	0.000486686	0.00985752	0.00406521	0.0101805	0.00138211	0.00679557	0.0211462	0.000574197	0.009031	0.0202891	0.000912364	0.0115165	0.0103286	0.000556574
1416953_at	CTGF	connective tissue growth factor	0.031031	0.00168599	0.00059391	0.0123055	0.00871426	0.000753543	0.0122931	0.00416903	0.0116861	0.000812537	0.0141408	0.0101671	0.000841207	0.019219	0.0344249	0.00610655
1416958_at	NR1D2	nuclear receptor subfamily 1, group D, member 2; predicted gene 5827	0.807838	0.00397898	0.00109036	0.967073	0.0470126	0.0015008	0.00354298	0.0462636	0.627424	0.00317473	0.373507	0.992121	0.0141308	0.501865	0.907559	0.0174454
1417001_a_at	D4Wsu53e	DNA segment, Chr 4, Wayne State University 53, expressed	0.0114682	0.000790578	0.00253811	0.0278983	0.040107	0.00163622	0.00672448	0.00304168	0.0196352	0.000789444	0.00918456	0.0109666	0	0.0131705	0.0694758	0.0026953
1417007_a_at	VPS4B	similar to vacuolar protein sorting 4b; vacuolar protein sorting 4b (yeast)	0.987228	0.000737068	0.00480834	0.974056	0.12281	0.00220468	0.0115566	0.209209	0.983761	0.00127614	0.631693	0.999821	0.00449273	0.985883	0.997193	0.00558297
1417011_at	SDC2	syndecan 2	0.979498	0.015339	0.00426537	0.42517	0.574103	0.0009595	0.189309	0.714344	0.948641	0.000172933	0.882706	0.178931	0.00282971	0.953222	0.781655	0.201187
1417017_at	CYP17A1	cytochrome P450, family 17, subfamily a, polypeptide 1	0.0652901	0.00532739	0.0307965	0.144953	0.00828646	0.000572188	9.51969e-11	0.00298664	0.010935	0.000512504	0.00741346	0.0383439	0.00365025	0.0460476	0.0153028	0.00102824
1417025_at	H2-Eb1	histocompatibility 2, class II antigen E beta	0.069664	0.000999244	0.000764444	0.0779892	0.172072	0.00184164	0.272649	0.00399802	0.019254	0.000163891	0.0208808	0.468872	0.00647366	0.0228457	0.0215047	0.000404611
1417058_a_at	KRTCAP2	keratinocyte associated protein 2	0.0121575	0.00483517	0.000845649	0.0149021	0.0100557	0.000833736	0.00149566	0.0048603	0.0810991	0.00098504	0.00947731	0.0132887	0.00237814	0.00997597	0.0179039	0.00067403
1417063_at	C1QB	complement component 1, q subcomponent, beta polypeptide	0.0167431	0.000636744	0.000501989	0.0176057	0.00924248	0	0.00586293	0.00407553	0.01143	0.00084744	0.00708719	0.0615867	0.00290063	0.012311	0.0122658	0.00063671
1417065_at	Egr1	early growth response 1	0.0110164	0.00111508	0.000510081	0.0102871	0.00404838	0.000856488	0.00110279	0.00439324	0.0220737	0.00048358	0.00671842	0.0116136	0.00135544	0.0160893	0.0149766	0.000686681
1417066_at	cabc1	chaperone, ABC1 activity of bc1 complex like (S. pombe)	0.011123	0.000678514	0.00473892	0.071142	0.0399997	0.000684696	0.000128225	0.00313285	0.0127865	0.00048488	0.00956094	0.0691228	0.0242192	0.0119127	0.0114618	0
1417085_at	Akr1c6	aldo-keto reductase family 1, member C6	0.016012	0.00227338	0.000945252	0.0113357	0.00421225	0.00247273	0.0018592	0.00288495	0.0127557	0	0.0427538	0.0482695	0.00295394	0.0179328	0.0101522	0.000544128
1417091_at	CHUK	conserved helix-loop-helix ubiquitous kinase	0.836274	0.00175165	0.00567127	0.443695	0.545895	0.00169546	0.00987621	0.0194004	0.97804	0.00200874	0.0998101	0.798048	0.00368621	0.838648	0.90328	0.0173097
1417111_at	Man1a	mannosidase 1, alpha	0.889421	0.00125996	0.000817589	0.625464	0.504815	0.000742666	0.00832093	0.258741	0.934132	0.00532048	0.594496	0.80645	0.141082	0.722496	0.761976	0.160979
1417141_at	Igtp	interferon gamma induced GTPase	0.010148	0.000742027	1.65201e-10	0.0115719	0.0350629	0.00230039	0.0177111	0.0050971	0.0102395	0.00133411	0.0099225	0.0200015	0.00101035	0.012663	0.0104976	2.59184e-05
1417168_a_at	USP2	ubiquitin specific peptidase 2	0.0149651	0.0695879	0.0160694	0.148108	0.011648	0.000692931	0.00110901	0.00368196	0.0130004	0.0016506	0.0134038	0.0183585	0.00187038	0.0196133	0.0124704	0
1417169_at	USP2	ubiquitin specific peptidase 2	0.0111723	0.0158702	0.00535971	0.092323	0.00802194	0.000991229	0.00183087	0.00281866	0.0106191	0.00127718	0.0106663	0.00951415	0.00102465	0.0121726	0.0103651	0.000504659
1417183_at	Dnaja2	DnaJ (Hsp40) homolog, subfamily A, member 2	0.480928	0.00111339	0.00671072	0.399773	0.116062	0.000521742	0.000978005	0.0127119	0.406381	0.000422093	0.0380611	0.222152	0.00566096	0.243493	0.456982	0.00194881
1417185_at	Ly6a	lymphocyte antigen 6 complex, locus A	0.00991549	0	0.000493726	0.0179336	0.0143664	0.00120748	0.00282799	0.00833553	0.00995267	0.000846613	0.0139853	0.0149387	0.000864396	0.0114886	0.00996527	0.000532238
1417191_at	dnajb9	predicted gene 6568; DnaJ (Hsp40) homolog, subfamily B, member 9	0.0763988	0.000933128	0.00176593	0.0452773	0.59603	0.0168039	0.00163595	0.00466676	0.2816	0.00439597	0.0969617	0.0445898	0.00458192	0.022386	0.0182657	0.000264737
1417203_at	Ethe1	ethylmalonic encephalopathy 1	0.0139798	0	0.000514529	0.00935862	0.00503486	0.00296045	0.00845859	0.0186016	0.0229877	0.000484427	0.0074377	0.0435673	0.00196267	0.0319785	0.0156368	9.31779e-06
1417208_at	AMACR	alpha-methylacyl-CoA racemase	0.0249463	0.00165758	0.00233862	0.331059	0.0346043	0.00138122	0.0282905	0.00890534	0.0266643	0.00100764	0.0333869	0.0466051	0.00086939	0.0239596	0.0266904	0.000786391
1417210_at	EIF2S3Y	eukaryotic translation initiation factor 2, subunit 3, structural gene Y-linked	0.0129103	0.00132352	0.000855744	0.0126871	0.00397922	0.00121125	0.00553758	0.00278312	0.0100164	0	0.00608196	0.0108241	0.000745096	0.0639811	0.0318377	0.00266889
1417273_at	PDK4	pyruvate dehydrogenase kinase, isoenzyme 4	0.00969215	0.00107205	0.000522044	0.0157409	0.0044252	0.000864257	0	0.00388236	0.0175916	0.00104205	0.0159956	0.0272272	0.00271691	0.010034	0.0121264	0.000595812
1417290_at	LRG1	leucine-rich alpha-2-glycoprotein 1	0.0107877	0.000701839	0.000525485	0.0102648	0.00409195	0.00545311	5.66127e-05	0.00372924	0.0126935	3.22807e-06	0.00644443	0.0189296	0.0013921	0.0117168	0.0118515	0.000564951
1417292_at	Ifi47	interferon gamma inducible protein 47	0.0139436	0.000774353	0.000577949	0.0261206	0.0758852	0.00185934	0.0161816	0.00569769	0.0119734	0.00276044	0.0246869	0.0105192	0.00183043	0.0113734	0.0144486	0
1417339_a_at	Gm11582	similar to cytoplasmic dynein light chain 1; predicted gene 11582; dynein light chain LC8-type 1; predicted gene 6788	0.00939892	0.000904847	0.000514361	0.00921982	0.00481606	0.000661371	0.00166229	0.00458566	0.0123505	0.000473373	0.00626294	0.0122509	0.00110337	0.00931712	0.00929073	0.000520214
1417373_a_at	TUBA4A	tubulin, alpha 4A	0.019697	0.00892543	0.0383367	0.360873	0.0389177	0.000470527	0.000549813	0.0133418	0.129638	0.000357723	0.027076	0.203154	0.0387676	0.0199047	0.0245429	1.76673e-05
1417374_at	TUBA4A	tubulin, alpha 4A	0.0118607	0.0106593	0.0150133	0.0935697	0.0253241	0.000612152	0	0.0131342	0.041121	5.83213e-05	0.0180928	0.0673036	0.00727306	0.0117448	0.0223939	0.000715682
1417381_at	C1qa	complement component 1, q subcomponent, alpha polypeptide	0.0125599	0.000508058	0.00051946	0.0204736	0.03832	0.000693468	0.00852468	0.00284525	0.0154244	0.00149031	0.00759287	0.0797655	0.00168994	0.0189902	0.0197591	0.000951004
1417384_at	Entpd5	ectonucleoside triphosphate diphosphohydrolase 5	0.130325	0.00110616	0.000464957	0.0106995	0.00581768	0	0.00142453	0.00423404	0.0303123	1.28576e-05	0.00805723	0.0145327	0.000918239	0.0129662	0.0296275	0.00142516
1417389_at	GPC1	glypican 1	0.0219804	0.000118462	0.00121325	0.0204329	0.00577006	0.00550608	0.000917458	0.0100716	0.0889179	0.00388617	0.0292843	0.0321159	0.00136254	0.0102067	0.0105246	0.000475458
1417399_at	gas6	growth arrest specific 6	0.011063	4.23036e-05	0.00283214	0.0317236	0.00586937	0.015252	0.0152488	0.00296612	0.0135185	0.000638855	0.00967227	0.0242118	0.00114226	0.0223144	0.0184464	0.000108268
1417403_at	Gm11295	predicted gene 11295; ELOVL family member 6, elongation of long chain fatty acids (yeast)	0.0186188	0.00313452	0.000919701	0.0339971	0.0100689	0.00462367	0.00110904	0.00354074	0.0383055	0.000973892	0.00782272	0.107176	0.00147259	0.0137158	0.0235092	0.000763128
1417404_at	Gm11295	predicted gene 11295; ELOVL family member 6, elongation of long chain fatty acids (yeast)	0.0247945	0.00225865	0.000855796	0.0287686	0.0121032	0.0168754	0.00109118	0.00342345	0.0329554	0	0.0065863	0.0748819	0.00148244	0.0136626	0.0204542	0.000792987
1417409_at	Jun	Jun oncogene	0.0189765	0.000610529	0.00023668	0.0137507	0.0050878	0.156096	0.0319245	0.00391962	0.0153833	0.000437001	0.0307216	0.021775	0.000459105	0.0299414	0.0146887	0.000254096
1417420_at	CCND1	cyclin D1	0.0257135	0.00100399	0.000956252	0.0149147	0.00735562	0.000938245	0.006948	0.000812843	0.0112657	3.5935e-09	0.00853373	0.186147	0.0181498	0.0117169	0.011674	0.000590091
1417434_at	Gpd2	glycerol phosphate dehydrogenase 2, mitochondrial	0.00961028	0.000531897	0.00048905	0.00947867	0.0039855	0.00200933	0.0025778	0.00291323	0.0170515	0.000748702	0.00840677	0.0361256	0.00250372	0.00963178	0.0111764	0.000570832
1417466_at	Rgs5	regulator of G-protein signaling 5	0.0201359	0.00448841	0.00351092	0.0368633	0.0363281	0.000680655	0.00111375	0.00348422	0.0331069	0.000593471	0.00994237	0.0952062	0.00354128	0.0146916	0.070264	0.00230221
1417495_x_at	CP	ceruloplasmin	0.0798362	0.00466489	0.0636965	0.653104	0.0487996	0.000106758	0.00138232	0.00469384	0.0672409	0.000881115	0.015292	0.722429	0.00791408	0.0272827	0.070829	0.00185809
1417496_at	CP	ceruloplasmin	0.00937993	0.000510305	3.47224e-05	0.0108935	0.00371124	0.000748896	0.00209449	0.00282926	0.0103152	0.000835075	0.025757	0.00962548	0	0.00938303	0.00944931	0.000503193
1417500_a_at	tgm2	transglutaminase 2, C polypeptide	0.0117753	0.00622333	0.00384667	0.00986146	0.00400758	0.00270754	0.00271991	3.04615e-06	0.0108034	0.00054999	0.0103324	0.0109931	1.09147e-05	0.0114793	0.0112746	0.000656
1417507_at	CYB561	cytochrome b-561	0.016883	0.00230152	9.73265e-06	0.00926444	0.00429496	0.000637445	0.00103189	0.00384164	0.0161678	0.000630139	0.00630793	0.0115587	0.000837507	0.0274032	0.0167011	0
1417512_at	EVI5	ecotropic viral integration site 5	0.974725	0.00149599	0.00131424	0.653706	0.186961	0.0002296	0.0719494	0.169602	0.997147	0.000409041	0.515243	0.412754	0.00140587	0.906851	0.980557	0.00104002
1417530_a_at	srp9	signal recognition particle 9	0.679976	0.000127515	0.000693063	0.144784	0.236405	0.000130767	0.000594743	0.00995603	0.573465	0.000304956	0.0951054	0.591715	0.00378617	0.456575	0.924031	0.017735
1417531_at	Cyp2j5	cytochrome P450, family 2, subfamily j, polypeptide 5	1	0.0153114	0.00738604	0.97447	0.341832	0.00711473	0.0338643	0.746131	1	0.00428783	0.998232	0.994291	0.0152634	1	1	0.00623528
1417532_at	Cyp2j5	cytochrome P450, family 2, subfamily j, polypeptide 5	0.818322	0.00537407	0.00862896	0.908055	0.0287145	0.00461826	0.00897556	0.131473	0.405996	0.000322944	0.160003	0.938494	0.00478907	0.118686	0.302454	0.0072808
1417619_at	gadd45gip1	growth arrest and DNA-damage-inducible, gamma interacting protein 1	0.0589656	0.00307725	0.000308114	0.0229237	0.0164611	0.00118175	1	0.0305281	0.319853	0.00331039	0.0227058	0.0584466	0.0173932	0.0491097	0.0965772	0.00247084
1417629_at	PRODH	proline dehydrogenase	0.107636	0.000264096	0.000387286	0.0259455	0.00585255	0.897822	0.296659	0.00660395	0.668592	0.000564802	0.413732	0.248234	0.083737	0.296726	0.0579064	0.00200561
1417654_at	Sdc4	syndecan 4	0.018615	0.00125412	2.28542e-05	0.0215753	0.0537483	0.000525497	0.00157374	0.00377457	0.0305215	0.00038339	0.00771519	0.0315497	0.00082024	0.0176235	0.0215365	0.000955097
1417702_a_at	HNMT	histamine N-methyltransferase	0.0980943	0.00181402	0.00122126	0.0297206	0.0428823	0.000674964	0.00191778	0.00387022	0.0362978	0.000535958	0.0111957	0.114152	0.00533864	0.0201915	0.137818	0.00453536
1417707_at	N4BP2L1	NEDD4 binding protein 2-like 1	0.0954876	0.00389566	0.0012459	0.0119316	0.00425185	0.00082486	0.000117022	0.00316679	0.0151621	0.000554222	0.00951223	0.0109939	0.000945133	0.0131701	0.0140433	0.000636373
1417710_at	METTL9	methyltransferase like 9	0.960904	0.00727585	0.00242379	0.659994	0.47277	0.00202895	0.00540565	0.343274	0.914232	0.0102677	0.355949	0.74481	0.0101756	0.971087	0.999506	0.00356026
1417712_at	Eif2s2	similar to Eif2s2 protein; eukaryotic translation initiation factor 2, subunit 2 (beta)	0.922804	0.0069655	0.00270009	0.978375	0.281924	0.00445428	0.00838788	0.715736	0.999978	0.00565385	0.893001	0.995037	0.0204289	0.997159	0.992876	0.0161479
1417714_x_at	Hba-a1	hemoglobin alpha, adult chain 2; hemoglobin alpha, adult chain 1	0.0225766	0.000917152	0.000837646	0.0205974	0.019256	0.00177029	0.00466208	0.00626816	0.018785	0.000721021	0.012683	0.0185486	0.000435068	0.0204149	0.021006	0.0010573
1417749_a_at	TJP1	tight junction protein 1	0.591251	0.00271152	0.00297067	0.999922	0.0529176	0.00386524	0.00865193	0.183979	0.999902	0.0167055	0.163863	0.950764	0.0620724	0.985845	0.990435	0.00937033
1417761_at	Apoa4	apolipoprotein A-IV	0.0201227	0.000259788	0	0.0252921	0.010993	0.461594	0.340597	0.00431017	0.0171449	0.000444816	0.0119258	0.0364479	0.00214172	0.0175672	0.0174666	0.000359658
1417765_a_at	Amy1	amylase 1, salivary	0.920006	0.00155174	0.00184796	0.559332	0.650915	0.000386649	0.0170278	0.111007	0.864953	0.001341	0.0982883	0.559464	0.00129136	0.57623	0.581659	0.00121766
1417767_at	LOC100047577	similar to cytochrome b5 outer mitochondrial membrane precursor; cytochrome b5 type B	0.254626	0.0218028	0.0162929	0.659419	0.0692194	0.000419921	0.001333	0.00766234	0.205789	0.00208331	0.0205896	0.214184	0.00763895	0.10417	0.0701735	0.000434737
1417768_at	pnpla8	patatin-like phospholipase domain containing 8	0.999935	0.00498399	0.00487418	0.985505	0.28683	0.00818044	0.0100701	0.808198	0.99999	0.00645737	0.95297	0.999704	0.0150961	0.995506	0.949021	0.0766654
1417770_s_at	Psmc6	proteasome (prosome, macropain) 26S subunit, ATPase, 6	0.904538	0.00499101	0.0072406	0.436679	0.601231	0.00247658	0.0168321	0.0594785	0.853396	0.00296532	0.526043	0.977471	0.0108094	0.858174	0.859416	0.159025
1417771_a_at	Psmc6	proteasome (prosome, macropain) 26S subunit, ATPase, 6	1	0.00428768	0.00367834	0.970601	0.209043	0.00523539	0.0101573	0.827093	0.999995	0.00350673	0.926296	0.994446	0.00857416	0.999907	0.999995	0.00446707
1417793_at	Irgm2	immunity-related GTPase family M member 2	0.0133966	0	1.49972e-05	0.0124417	0.0217775	0.00328199	0.0159782	0.00515217	0.0140395	0.00316397	0.0113512	0.0154316	0.000895412	0.0112556	0.0160408	0.000860671
1417818_at	WWTR1	WW domain containing transcription regulator 1	0.32949	0.00372785	0.00752263	0.326039	0.0788923	0.000351719	0.0010215	0.00603861	0.112721	2.16917e-05	0.0163324	0.846041	0.00106958	0.0518856	0.273809	0.00420914
1417821_at	D17H6S56E-5	DNA segment, Chr 17, human D6S56E 5	0.013408	0.000579167	0.000915853	0.0246807	0.00408129	0.00086472	0.0021397	0.00311122	0.0134917	0.000532267	0.0176934	0.00970673	0.000900045	0.0108785	0.0158419	0.000741065
1417828_at	AQP8	aquaporin 8	0.0150193	0.000241093	0.00041484	0.014101	0.00183256	0.22324	0.0687428	0.00433986	0.014367	0.000862492	0.0088749	0.0384723	0.00157141	0.0378988	0.0319878	0.00120365
1417851_at	CXCL13	chemokine (C-X-C motif) ligand 13	0.0802927	0.000835681	0.000326735	0.033596	0.0150146	0.00667371	0.0021695	0.00707977	0.0440582	0.00269707	0.0582681	0.0368449	0.00195383	0.253626	0.094796	0.00221285
1417880_at	G6PC	glucose-6-phosphatase, catalytic	0.00924739	0.000685653	0.00129182	0.0435179	0.0368232	0.00243887	0.0015149	0.00286985	0.00960088	2.34778e-05	0.00692053	0.0286708	0.004264	0.0102859	0.020027	0.000909478
1417896_at	tjp3	tight junction protein 3	0.0159305	0.0111578	0.0338994	0.19974	0.13889	0.0022687	0.00174469	0.00533699	0.0270012	0	0.0107274	0.0188655	0.00248814	0.0126516	0.0286337	0.00015677
1417936_at	Ccl9	chemokine (C-C motif) ligand 9	0.0339264	0.00382595	0.0015939	0.0387454	0.0118658	0.00121974	0.00218706	0.00518869	0.0244418	7.56973e-06	0.0167099	0.0357491	0.00252523	0.0485418	0.0203274	0.000604946
1417946_at	ABHD3	abhydrolase domain containing 3	0.412055	0.000464005	0.000581368	0.0229503	0.176894	0.000336903	0.000896916	0.0054523	0.022205	0.000410795	0.0119233	0.0923937	0.00246034	0.0184825	0.0662614	0.00288974
1417956_at	CIDEA	cell death-inducing DNA fragmentation factor, alpha subunit-like effector A	0.0129103	0.00713316	0.00593507	0.107219	0.00154642	0.0742969	0.00206247	0.00494555	0.0204614	7.06929e-06	0.0100553	0.113209	0.00513691	0.0126748	0.0190876	0.000729345
1417962_s_at	GHR	growth hormone receptor	0.98768	0.0116472	0.00521829	0.880256	0.196267	0.00684698	0.0146425	0.85392	0.995714	0.0041801	0.858387	0.998285	0.00846231	0.967548	0.895308	0.134616
1417963_at	Pltp	phospholipid transfer protein	0.0302851	0.000570014	0.000801406	0.057648	0.00654169	0.271017	0.0112933	0.00221021	0.0295236	0.000480286	0.0133665	0.310891	0.0254926	0.0230937	0.014586	0.000211618
1417980_a_at	Insig2	insulin induced gene 2	0.0349368	2.0447e-05	0.00381383	0.214586	0.0272085	1.71034e-05	0.00155568	0.0159007	0.014453	7.4294e-08	0.00905686	0.0222496	0.00508651	0.0893906	0.0999752	0.00403138
1417981_at	Insig2	insulin induced gene 2	0.0206076	0.000970257	0.00127174	0.0468112	0.00634105	0.000724371	0.00194079	0.0107363	0.0140615	2.4952e-05	0.00618714	0.0199577	0.00728199	0.018889	0.0594984	0.00232625
1417982_at	Insig2	insulin induced gene 2	0.025532	0.00156888	0.00356507	0.146886	0.0193335	0	0.00149655	0.00495479	0.0106027	0.00141166	0.00751979	0.0242564	0.0132648	0.012427	0.0179063	0.000732545
1417991_at	LOC100047801	deiodinase, iodothyronine, type I; similar to Dio1 protein	0.113571	6.2167e-05	0.000531866	0.0147516	0.00402925	0.00241984	0.00111432	0.00281838	0.0190891	0.000530142	0.0486743	0.0114235	0.000863728	0.0103316	0.0128489	0.000700704
1418013_at	Nat8b	N-acetyltransferase 8B; camello-like 1	0.0096362	0.000247349	9.40206e-05	0.0176898	0.0321153	0.345644	0.00738089	0.0104453	0.393187	0.00406897	0.237143	0.0190661	2.43401e-05	0.272286	0.0741833	0.00289764
1418024_at	naa15	NMDA receptor-regulated gene 1	0.024548	0.00174215	0.00155521	0.0797333	0.0103244	0.000793028	0.000994857	0.00718612	0.311021	0.0018155	0.0340903	0.0715223	0.00448111	0.0227218	0.0260437	0.000461884
1418028_at	dct	similar to Dopachrome tautomerase; dopachrome tautomerase	0.12299	0.000490011	0.000662843	0.0396777	0.00335776	0.00318772	0.154343	0.00845037	0.356307	0.000712555	0.0909601	0.152808	0.00389697	0.088634	0.0480733	0.00172321
1418050_at	Gpld1	glycosylphosphatidylinositol specific phospholipase D1	0.0722064	0.000309996	0.000142751	0.0252448	0.00729101	0.350772	0.926394	0.036217	0.582486	0.000161586	0.020302	0.223029	0.00343042	0.224058	0.217845	0.00633772
1418072_at	Hist1h2bb	histone cluster 1, H2bb	0.0469638	0.00061142	0.000232028	0.0216651	0.00766754	0.00182719	0.00228213	0.281615	0.676212	0.00110195	0.05033	0.0224175	0.00129409	0.0192378	0.0260199	0.000715028
1418129_at	DHCR24	24-dehydrocholesterol reductase	0.0145079	0.000855407	3.332e-08	0.0103079	0.00518409	0	0.00102225	0.00313778	0.0115484	0.000491455	0.00686726	0.0106072	0.000805458	0.03452	0.0602743	0.00342925
1418138_at	Sult1d1	sulfotransferase family 1D, member 1	0.219272	0.000763604	0	0.014233	0.0111733	0.038904	0.0361998	0.00585851	0.0144248	1.92103e-05	0.0142564	0.0139516	0.000740882	0.0278499	0.278128	0.0309223
1418148_at	ABHD1	abhydrolase domain containing 1	0.062972	0.00103284	0.000829162	0.0198348	0.00833382	0.00127942	0.00159573	0.00521595	0.0203588	0.00155742	0.0476116	0.0226369	0.00118601	0.0216805	0.0181396	0.000776617
1418171_at	TCEAL8	transcription elongation factor A (SII)-like 8; similar to transcription elongation factor A (SII)-like 8	0.0270525	0.00089798	0.00167013	0.0993372	0.038507	0.00304649	0.00114317	0.00293858	0.0171489	7.94556e-05	0.00830764	0.0171986	0.000806155	0.0119856	0.0194	0.000777515
1418174_at	dbp	D site albumin promoter binding protein	0.0107034	0.00339204	0.003533	0.12786	0.0171339	0.00517035	0.00467499	0.00416259	0.0125132	0.000770584	0.0124748	0.0772706	0.00738725	0.0134228	0.0131119	0.000532462
1418188_a_at	MALAT1	metastasis associated lung adenocarcinoma transcript 1 (non-coding RNA)	0.268375	0.00180716	0.00337146	0.998103	0.0304872	0.00605104	0.00791012	0.0240294	0.992563	0.00281076	0.0906864	0.998044	0.00490076	0.931952	0.990476	0.010425
1418189_s_at	MALAT1	metastasis associated lung adenocarcinoma transcript 1 (non-coding RNA)	0.30576	0.00470377	0.00219526	0.999511	0.0339749	0.0026971	0.00492561	0.0242545	0.9979	0.00247264	0.149639	0.99991	0.0019691	0.926892	0.991071	0.00714861
1418258_s_at	Dynll2	dynein light chain LC8-type 2	0.0441967	0.0115911	0.00268038	0.05766	0.0235827	0.000734792	0.00119657	0.0043563	0.0370304	0.00063504	0.00864518	0.10209	0.00189036	0.0108864	0.0113465	1.10776e-06
1418288_at	lpin1	lipin 1	0.0241873	0.00194778	0.00123864	0.0244467	0.0055819	0.00130823	0.00139368	0.00372257	0.0111121	0.000485341	0.00692594	0.0106027	0.000907998	0.0116789	0.0245886	0.000828856
1418300_a_at	MKNK2	MAP kinase-interacting serine/threonine kinase 2	0.0094774	0.00114292	0.000910483	0.014053	0.00402472	0.00551938	0.00174455	0.0028884	0.0164269	0.00111544	0.00793211	0.0176553	0.0016896	0.0097467	0.00932219	0
1418318_at	RNF128	ring finger protein 128	0.99889	0.0446802	0.0140973	0.792992	0.347848	0.00248676	0.0101864	0.980021	0.999783	0.00341799	0.998178	0.883449	0.0213139	0.998337	0.734004	0.35856
1418352_at	HSD17B2	hydroxysteroid (17-beta) dehydrogenase 2	0.0218776	0.0238938	0.00184183	0.0174618	0.0039939	0.000695806	0.00140605	0.00544296	0.0206239	0.000110565	0.00855595	0.0148368	0.00470666	0.0129344	0.0244387	0.000929251
1418430_at	Kif5b	kinesin family member 5B	0.14036	0.00545283	0.00121043	0.99847	0.0110383	0.00103311	0.00106915	0.0178005	0.951152	0.000340424	0.0439893	0.675206	0.162	0.184163	0.525783	0.00578144
1418433_at	cab39	calcium binding protein 39	0.992321	0.00335773	0.0104262	0.756309	0.456381	0.00110498	0.00679101	0.998514	1	0.00274817	0.946886	0.876295	0.00414383	0.999869	0.817771	0.247972
1418438_at	FABP2	fatty acid binding protein 2, intestinal	0.0181366	0.00344736	0.00306616	0.0766553	0.0135914	0.0110031	0.00193392	0.00622712	0.0675655	0.000613486	0.01751	0.368516	0.00466921	0.0192005	0.0391453	0.000579607
1418486_at	Vnn1	vanin 1	0.0304902	0.00053182	0.000533071	0.0140945	0.0049167	0.035728	0.00959436	0.00389332	0.0109302	0.000516315	0.0117182	0.0832223	0.00331435	0.0143757	0.0121577	0.000517757
1418501_a_at	oxr1	oxidation resistance 1	0.998669	0.00419357	0.00415057	0.981097	0.23422	0.00477172	0.0139703	0.760073	1	0.005927	0.989745	0.984159	0.018955	0.999657	0.945518	0.0853012
1418502_a_at	oxr1	oxidation resistance 1	0.996934	0.00321913	0.00329358	0.963861	0.197364	0.000516724	0.00831107	0.309465	0.999937	0.00281423	0.296655	0.341195	0.033387	0.99445	0.99708	0.0025878
1418536_at	LOC676708	histocompatibility 2, Q region locus 1; histocompatibility 2, Q region locus 9; similar to H-2 class I histocompatibility antigen, L-D alpha chain precursor; histocompatibility 2, Q region locus 8; histocompatibility 2, Q region locus 2; similar to MHC class Ib antigen; histocompatibility 2, Q region locus 7; histocompatibility 2, Q region locus 6; hypothetical protein LOC100044307; similar to H-…	0.0166868	0.000404284	0.000302961	0.0317684	0.0713538	0.00125657	0.402869	0.00612579	0.0153324	0	0.0108257	0.126893	0.00209323	0.0167884	0.0159192	1.66571e-10
1418547_at	TFPI2	tissue factor pathway inhibitor 2	0.998812	0.00975424	0.004198	0.6504	0.375237	0.00297122	0.00541298	0.0305893	0.886878	0.000268526	0.660715	0.993014	0.00261655	0.833833	0.940935	0.00249424
1418574_a_at	SHFM1	split hand/foot malformation (ectrodactyly) type 1	0.0347198	0.00182238	0.000936131	0.0189951	0.00403527	0.00102027	0.00140731	0.0069451	0.0255981	0.0010095	0.006759	0.0490097	0.000886847	0.0141591	0.0599767	0.0013881
1418580_at	rtp4	receptor transporter protein 4	0.0128544	0.000212027	0.000433541	0.0215435	0.0966147	0.00537678	0.0126309	0.00396885	0.0217788	0.00232577	0.0177477	0.235221	0.00206029	0.0137695	0.0355279	0.00133683
1418595_at	PLIN4	plasma membrane associated protein, S3-12	0.0188145	0.000596582	0.000653573	0.01723	0.00834486	0.0365472	0.0087734	0.00286841	0.00949921	0.000509901	0.00651833	0.0102573	0	0.00988334	0.0101461	4.1025e-05
1418622_at	RAB2A	predicted gene 5865; RAB2A, member RAS oncogene family	0.992905	0.0048348	0.00648047	0.981192	0.126466	0.0227749	0.00595264	0.320255	0.998933	0.00406541	0.141989	0.986862	0.00772972	0.992591	0.997874	0.00448573
1418624_at	LOC100045189	similar to transcription factor EF1(A)	0.0584246	0.000803905	0.000712818	0.0407885	0.463477	0.000221751	0.00139073	0.0138297	0.236395	0.000967911	0.0296567	0.302182	0.00904071	0.0435736	0.0849927	0.00067222
1418645_at	hal	histidine ammonia lyase	0.0152798	0.00032298	0.000214041	0.0388794	0.0086354	0.00485447	0.0827067	0.00920187	0.0215068	5.01957e-10	0.0175458	0.123749	0.461345	0.0706554	0.02681	5.55887e-05
1418652_at	Cxcl9	chemokine (C-X-C motif) ligand 9	0.0154347	0	0.000584395	0.0163959	0.00549967	0.000513372	0.00106476	0.00502025	0.0260386	0.00136178	0.0134297	0.462572	0.01077	0.0414136	0.0216826	0.000450709
1418653_at	Cyp2c50	cytochrome P450, family 2, subfamily c, polypeptide 50	0.16203	0.000330924	0.000818445	0.0565776	0.0243203	0.0352721	0.377153	0.00448896	0.016665	0.000506328	0.0184636	0.0190468	0.00105021	0.0311298	0.0133657	0.000579431
1418654_at	hao2	hydroxyacid oxidase 2	0.0170366	0.02936	0.0145278	0.111571	0.0623828	0.000965106	0.000926721	0.00340414	0.0107051	0.000431298	0.00869119	0.0148237	0.000852033	0.120644	0.0170371	2.11559e-05
1418680_at	serpind1	serine (or cysteine) peptidase inhibitor, clade D, member 1	0.0115914	0.00561742	0.000994402	0.010176	0.00421611	0.00190673	0.00186553	0.00327853	0.0102853	0	0.00846522	0.0102362	0	0.0213146	0.0101402	0.000548912
1418697_at	INMT	indolethylamine N-methyltransferase	0.0118921	0.00189397	0.000909496	0.0128054	0.00384536	0.0076725	0.00108102	0.00297221	0.0133284	0.000567469	0.0175313	0.0118478	0.0008151	0.0108861	0.0126663	0.000837527
1418701_at	COMT1	catechol-O-methyltransferase 1	0.0178566	0.0017216	3.79606e-05	0.0153483	0.051143	0.00152745	0.00378265	0.00393675	0.0141409	0.000571384	0.0106185	0.324927	0.025088	0.0476115	0.046014	0.00290186
1418715_at	PANK1	pantothenate kinase 1	0.103331	0.0302517	0.00368213	0.0524745	0.00759941	0.00123465	0.00299369	0.00295111	0.015024	0.000542677	0.015835	0.0614882	0.00109705	0.0172051	0.0213695	0.000589834
1418746_at	PNKD	paroxysmal nonkinesiogenic dyskinesia	0.0165593	0.000718523	0.00184057	0.0370214	0.00681738	0.00104949	0.00512742	0.00467365	0.0145163	0.000532896	0.0117793	0.135653	0.00946951	0.0160345	0.0158638	1.5633e-05
1418760_at	rdh11	retinol dehydrogenase 11	0.0650261	0.00262601	0.00158878	0.0608543	0.0125751	0.00105029	0.00103575	0.0032626	0.0172869	0.000811478	0.00784063	0.027013	0	0.0999344	0.0173097	0.00017645
1418780_at	CYP39A1	cytochrome P450, family 39, subfamily a, polypeptide 1	0.116971	0.00217581	0.0662042	0.386929	0.189912	0.00133355	0.00240143	0.00464946	0.0419634	0.000974473	0.0781573	0.0615842	0.00160995	0.356353	0.0837987	0.000874771
1418804_at	SUCNR1	succinate receptor 1	0.014596	0.000635567	3.90304e-06	0.0128914	0.00549822	0.00101532	0.000726678	0.00381278	0.024596	0.000249282	0.0117735	0.081497	0.000495672	0.0158243	0.0141164	0.000745924
1418815_at	CDH2	cadherin 2; similar to N-cadherin	0.998638	0.0310347	0.00433999	0.955852	0.136449	0.00533232	0.0184142	0.762764	0.998504	0.00398515	0.99018	0.998462	0.00907666	0.987766	0.86788	0.181469
1418817_at	CHMP1B	chromatin modifying protein 1B; RIKEN cDNA 2610002M06 gene	0.201676	0.0015925	0.00250257	0.444283	0.594125	0.000333878	0.00106561	0.0267397	0.779412	0.00191742	0.117064	0.985243	0.00246501	0.166703	0.300163	0.00656673
1418822_a_at	Arf6	ADP-ribosylation factor 6	0.0209262	0.00995695	0.0100125	0.46406	0.0514163	1.11973e-05	0.000764398	0.00376209	0.0365845	0.00041863	0.0104024	0.144601	0.00779366	0.0217297	0.017354	0.00140159
1418833_at	agxt	alanine-glyoxylate aminotransferase	0.017358	0.00323171	0.00150986	0.0201487	0.00570847	0.0152409	0.0632679	0.00847591	0.0349864	0.000751258	0.0181412	0.0567201	0.00219107	0.463867	0.0599603	0.00153956
1418835_at	phlda1	pleckstrin homology-like domain, family A, member 1	0.0845656	0	1.12007e-06	0.0105997	0.00429636	0.0006698	0.0104637	0.00324277	0.0104977	3.2205e-06	0.0083805	0.0118835	0.000812437	0.0130424	0.0669556	0.00414251
1418840_at	PDCD4	programmed cell death 4	0.752534	0.00364945	0.00421794	0.994834	0.0538452	0.00451852	0.00629736	0.151677	0.995447	0.00230385	0.235593	0.999114	0.00365355	0.962421	0.977855	0.0055676
1418858_at	Aox3	aldehyde oxidase 3	0.0108218	0.00052399	0.000596361	0.0123285	0.00440252	0.000717644	0.00139973	0.00512885	0.0133254	8.85027e-09	0.0081796	0.1484	0.0133799	0.0135858	0.0242633	0.00079691
1418883_a_at	PABPC1	poly(A) binding protein, cytoplasmic 1	0.996025	0.0176792	0.00393624	0.997838	0.451948	0.0111104	0.00915748	0.991865	1	0.0131513	0.901438	0.989054	0.0219606	0.999682	1	0.0053085
1418901_at	CEBPB	CCAAT/enhancer binding protein (C/EBP), beta	0.0119141	0.000841757	0.00399202	0.0236129	0.00481518	0.000766864	0.00159364	0.00737093	0.0342316	0.00098939	0.011339	0.0100928	9.94705e-06	0.0135221	0.0104594	0.000522272
1418907_at	LOC100048143	coagulation factor V; similar to Murine coagulation factor V	0.925072	0.00261632	0.00604935	0.630548	0.734798	0.00462989	0.0107472	0.238214	0.996274	0.00331809	0.967762	0.897976	0.123567	0.97964	0.957123	0.049419
1418918_at	IGFBP1	insulin-like growth factor binding protein 1	0.0106106	0.00116001	0	0.0152748	0.0146754	0.0024524	0.00173746	0.00299014	0.0253378	0.000468261	0.00762213	0.0571153	0.00414056	0.015729	0.0105171	0.000543106
1418979_at	Akr1c14	aldo-keto reductase family 1, member C14	0.104867	0.0140222	0.00225716	0.0550296	0.0366546	0.000594384	0.00100635	0.0046694	0.0946455	0.000834083	0.0101996	0.141493	0.00691437	0.017162	0.0761864	0.00269515
1418989_at	CTSE	cathepsin E	0.0248021	2.41678e-08	0.000917725	0.0186974	0.00727074	0.0200391	0.0670939	0.0251604	0.0367223	0.000870936	0.0487338	0.150373	0.00247995	0.0231391	0.0231296	0.000280756
1418992_at	F10	coagulation factor X	0.0540088	0.00169949	0.00125764	0.0260317	0.0146681	0.0551047	0.172889	0.00367885	0.0324539	0.000511813	0.0937745	0.0285682	0.000298779	0.0304519	0.200044	0.0141474
1418996_a_at	LYRM5	LYR motif containing 5	0.957869	0.00762204	0.0190259	0.301144	0.879472	0.00242502	0.0277407	0.180184	0.905595	0.00195354	0.462068	0.348831	0.00494427	0.981091	0.981775	0.00292816
1419024_at	LOC100044642	similar to tyrosine phosphatase; predicted gene 8783; predicted gene 15801; predicted gene 5951; protein tyrosine phosphatase 4a1; similar to killer cell lectin-like receptor subfamily A member 2	0.839032	0.00423883	0.0235736	0.990128	0.098039	0.00456169	0.0074096	0.0304111	0.987292	0.00598451	0.104893	0.958364	0.054192	0.996985	0.992182	0.00809058
1419031_at	FADS2	fatty acid desaturase 2	0.0120245	0.00274568	0.000626165	0.0109374	0.00508045	0.00294793	0.0100966	0.00315376	0.0149333	0.000639109	0.00624731	0.026526	0.00140842	0.0112433	0.0101255	0.000553989
1419042_at	iigp1	interferon inducible GTPase 1; interferon-inducible GTPase-like	0.167833	0.00601699	0.0237505	0.232571	0.0132879	0.000100111	0.00105547	0.0320463	0.0936331	0.00293012	0.0401756	0.987447	0.00211327	0.0289697	0.0352326	0.00104573
1419043_a_at	iigp1	interferon inducible GTPase 1; interferon-inducible GTPase-like	0.231518	0.00603531	0.0660707	0.288171	0.01675	0.00121058	0.000686626	0.0676976	0.151493	0.00882221	0.0644987	0.967315	0.00188026	0.0267239	0.0276722	0.000534291
1419045_at	SLC25A23	solute carrier family 25 (mitochondrial carrier; phosphate carrier), member 23	0.013192	0	1.76943e-05	0.0114359	0.00449218	0.00245333	0.0332081	0.00777134	0.0147683	0	0.0273798	0.0349396	0.00422944	0.0110795	0.0131455	5.78058e-06
1419059_at	Apcs	serum amyloid P-component	0.0219674	0.000919804	0.00512736	0.133585	0.0109028	0.000962491	0.00329548	0.00498709	0.018584	0.000796997	0.0127533	0.0206096	0.00113047	0.0365959	0.0340057	0.00100167
1419074_at	Chac2	ChaC, cation transport regulator homolog 2 (E. coli)	0.434976	0.00704198	0.00263176	0.392185	0.126929	0.00351322	0.0094342	0.0260632	0.368944	0.000176052	0.180732	0.663883	0.00819152	0.498194	0.819041	0.0186922
1419075_s_at	SAA1	serum amyloid A 1	0.0220102	0.000792254	0	0.013594	0.0099157	0.000940456	0.00104036	0.00305009	0.0161443	0	0.00761308	0.00992242	0	0.0106088	0.00947201	1.44883e-07
1419091_a_at	LOC100048867	similar to Annexin A2 (Annexin II) (Lipocortin II) (Calpactin I heavy chain) (Chromobindin-8) (p36) (Protein I) (Placental anticoagulant protein IV) (PAP-IV); annexin A2	0.0193461	0.0082306	0.00271364	0.0455277	0.00816196	0.81975	0.0140602	0.0124729	0.0170254	0.000793817	0.0115547	0.0518496	0.00198699	0.0151947	0.0214407	0.000779829
1419093_at	tdo2	tryptophan 2,3-dioxygenase	0.0825766	0.00186728	0.0012977	0.0166915	0.0159402	0.00540879	0.00464608	0.00381892	0.0620709	0.000879794	0.0114589	0.0280005	0.0015623	0.0166594	0.0536712	0.00103782
1419094_at	Cyp2c37	similar to cytochrome P450; CYP2C37; cytochrome P450, family 2. subfamily c, polypeptide 37	0.479879	0.000769678	0.000575131	0.0427046	0.0489639	0.15387	0.969291	0.00408375	0.049284	2.04392e-05	0.151327	0.136715	0.0105335	0.860335	0.117436	0.00614857
1419095_a_at	APOM	apolipoprotein M	0.0258172	0.0027419	0.00282962	0.0246955	0.0063337	0.00676195	0.00135475	0.00672049	0.0807365	0.000622227	0.163419	0.0300906	0.0129233	0.713193	0.0952536	0.00507413
1419100_at	Serpina3n	serine (or cysteine) peptidase inhibitor, clade A, member 3N	0.00934313	0.000936674	0.000921102	0.0188031	0.00672927	1.14893e-08	0.0012675	0.00440051	0.0158877	8.89792e-08	0.00743081	0.0115106	0	0.00939912	0.00952492	0
1419146_a_at	gck	glucokinase	0.0149654	0.00800423	0.00353306	0.175468	0.00983708	0.00265448	0.00966015	0.00278256	0.0169373	0.000814103	0.00766935	0.0883091	0.00453557	0.0300864	0.0164704	1.1354e-07
1419162_s_at	DNAJC3	DnaJ (Hsp40) homolog, subfamily C, member 3	0.19194	0.000682278	0.0140068	0.373213	0.575093	0.000110179	0.000590521	0.0164856	0.395882	0.0005023	0.0242614	0.422	0.00643624	0.0718129	0.124998	0.000192874
1419196_at	Hamp	hepcidin antimicrobial peptide	0.0181664	0.000700502	0.000707154	0.0382801	0.0049097	0.00584954	0.00302197	0.0119552	0.0106548	0.000597432	0.0110532	0.0133489	0.00119203	0.00970061	0.0147502	0.000605252
1419197_x_at	Hamp	hepcidin antimicrobial peptide	0.0116463	0.000596823	0.000672946	0.0324142	0.0043393	0.0102962	0.00580648	0.00850679	0.0100304	0	0.0101737	0.0168586	0.00152163	0.00973602	0.01461	0.000610982
1419209_at	CXCL1	chemokine (C-X-C motif) ligand 1	0.012046	0.0141078	0.00127601	0.0122836	0.00399162	0	0.00122141	0.00356515	0.0119226	0	0.00849834	0.00993225	0.000947571	0.0300627	0.0308546	0.00386062
1419291_x_at	GAS5	growth arrest specific 5	0.0331825	0.00062836	0.0030357	0.547067	0.0340857	0.000964271	0.00232681	0.00777793	0.0294899	0.000553569	0.0185148	0.948944	0.00202743	0.0719309	0.138946	0.00351381
1419318_at	SAA4	serum amyloid A 4	0.0159472	0.00108472	0.00181265	0.021563	0.0105398	0.0150245	0.035705	0.00662996	0.0149522	1.30259e-05	0.00868402	0.0187539	0.00108716	0.0113678	0.0214972	5.94831e-05
1419349_a_at	Cyp2d9	cytochrome P450, family 2, subfamily d, polypeptide 9	0.0215343	0.0143447	0.0218805	0.13142	0.0104041	0.00134549	0.00114219	0.00292432	0.0159065	0.000494364	0.00672256	0.0137035	0.000293974	0.147478	0.0354211	0.003032
1419365_at	PEX11A	peroxisomal biogenesis factor 11 alpha	0.0259198	0.000668616	0	0.0126795	0.00427561	6.84569e-05	0.00178864	0.00323789	0.00980247	0.000470553	0.00620955	0.0142263	0.00126451	0.00999305	0.0168346	0.00136058
1419394_s_at	S100A8	S100 calcium binding protein A8 (calgranulin A)	0.0125013	0.000490924	0.00045745	0.0104687	0.00780923	0.000712039	0.00105728	0.00393896	0.0164534	0.000513794	0.00759094	0.0141308	0.000747503	0.0755322	0.0775553	0.00457341
1419398_a_at	REEP5	receptor accessory protein 5	0.0124412	0.00057838	0.000516781	0.0113378	0.0059117	0.00868867	0.0135657	0.00616751	0.0143804	3.60499e-07	0.0103437	0.0156387	0.00118166	0.0115732	0.0108644	0.000539557
1419407_at	Hc	hemolytic complement	0.0929551	0.00141401	0.00568093	0.0619094	0.0842328	0.000933476	0.00245828	0.00971145	0.0250635	0.00062554	0.0162895	0.0216176	0.000263273	0.0631009	0.0934678	0.00155017
1419435_at	AOX1	aldehyde oxidase 1	0.234847	0.00148098	0.00273009	0.0967764	0.00902482	0.0013106	0.00173153	0.00800925	0.0265855	0.000746968	0.0179314	0.0450787	0.00198555	0.0348773	0.0639651	0.00313103
1419436_at	Cfhr1	complement factor H-related 1	0.351215	0.000285354	0.00298597	0.097724	0.31393	0.00266037	0.0186735	0.00161954	0.0378156	1.31976e-06	0.010554	0.146393	0.00541708	0.0303116	0.037885	0.000734122
1419452_at	UCHL5	ubiquitin carboxyl-terminal esterase L5	0.954495	0.0067575	0.00672639	0.986437	0.286548	0.00515421	0.013093	0.692667	1	0.00220156	0.990757	0.993235	0.017027	0.999998	0.99556	0.0107226
1419499_at	GPAM	glycerol-3-phosphate acyltransferase, mitochondrial	0.0127753	0.000596153	0.000448918	0.0134934	0.00436237	0.0585642	0.00778475	0.00352183	0.0132172	4.68856e-05	0.0151281	0.216353	0.00187979	0.015239	0.0160122	0
1419510_at	Es22	esterase 22	0.0110716	0.000582133	0.000627549	0.0112573	0.00421371	0.00689486	0.00114161	0.00428156	0.0117431	0	0.00919695	0.0201874	0.000952112	0.01655	0.012576	0
1419523_at	Cyp3a13	cytochrome P450, family 3, subfamily a, polypeptide 13	0.0691232	0.00103622	8.57805e-05	0.0239608	0.034712	0.00615079	0.0067227	0.00705101	0.0224078	1.18098e-07	0.0273872	0.0218732	0.00129669	0.0686706	0.0923051	0.00366975
1419528_at	LOC100043194	RIKEN cDNA C730007P19 gene; similar to androgen-repressible liver protein SMP-2; sulfotransferase family 2A, dehydroepiandrosterone (DHEA)-preferring, member 1	0.0170295	0.0132992	0.0109392	0.0779207	0.0559142	0.00144689	0.0013727	0.00276855	0.0154235	1.83969e-05	0.0107653	0.047017	0.00497088	0.394781	0.040544	0.00237009
1419559_at	Cyp4f14	cytochrome P450, family 4, subfamily f, polypeptide 14	0.0508626	0.000536694	9.36399e-06	0.0101762	0.00363756	0.0481282	0.0736164	0.00393197	0.0161889	0.000509167	0.0188687	0.0155409	0.000767092	0.0665117	0.029725	0.00102803
1419573_a_at	LGALS1	lectin, galactose binding, soluble 1	0.02818	0.00309989	0.00848077	0.104233	0.0223616	0.559782	0.00474466	0.0118555	0.0383505	0.000583285	0.0302475	0.266836	0.724331	0.0332864	0.0239025	0.00027983
1419590_at	LOC100047700	similar to testosterone 16a-hydroxylase type a; cytochrome P450, family 2, subfamily b, polypeptide 9	0.0318534	0.000587026	4.40867e-07	0.0186843	0.00754207	0.00174677	0.00182425	0.00936152	0.0259937	0.00231243	0.0138687	0.0201159	0.00070332	0.0251347	0.0192084	0.000463225
1419653_a_at	Gm12183	DEAD (Asp-Glu-Ala-Asp) box polypeptide 5; predicted gene 12183	0.119114	0.00160239	0.038604	0.643279	0.0157216	0.000394023	0.00130951	0.00726663	0.32929	0.00286215	0.0277753	0.322007	0.00547588	0.068299	0.0413716	0.00058526
1419669_at	PRTN3	proteinase 3	0.0272067	0.000602174	0.000590827	0.0121209	0.00889502	0.000676438	0.000975347	0.00300099	0.0131086	0.000470844	0.00857327	0.0112867	0.000797658	0.0233284	0.0249861	0.00114507
1419704_at	Cyp3a41a	cytochrome P450, family 3, subfamily a, polypeptide 41A; cytochrome P450, family 3, subfamily a, polypeptide 41B	0.0986325	0.0265536	0.020598	0.335286	0.0705649	4.54138e-06	0.000428244	0.00267891	0.0144333	0.000405642	0.00776475	0.0160669	0.000580755	0.0907267	0.0352003	0.00254863
1419734_at	ACTB	actin, beta	0.0119499	0.000616968	0.00074184	0.011472	0.00468631	0.000922918	1.04163e-05	0.0279791	0.0338761	0.00134486	0.0221232	0.0134962	0.000803112	0.026534	0.0106139	0.00054383
1419751_x_at	AB056442	cDNA sequence AB056442	0.0356798	0.0973881	0.101541	0.503054	0.0409944	0.00197096	0.0051788	0.00383098	0.0203157	1.50883e-05	0.0126629	0.0330348	0.00106331	0.0878865	0.01721	0.000484206
1419762_at	UBD	ubiquitin D	0.00988481	0.000645446	0	0.0100594	0.00857366	0.000646572	0.00108149	0.00379713	0.0225135	0.00107275	0.0390932	0.0111276	0.000945283	0.0136331	0.011785	0
1419816_s_at	ERRFI1	ERBB receptor feedback inhibitor 1	0.0255229	0.00067726	0.00171558	0.0361663	0.00378236	1.71078e-07	0.00102641	0.00303018	0.0128371	0.000605466	0.010752	0.0108793	9.06006e-07	0.0569953	0.0125116	0.000529371
1419819_s_at	SEC63	SEC63-like (S. cerevisiae)	0.921245	0.00460553	0.00507701	0.972885	0.15373	0.00319432	0.0070524	0.447876	0.999798	0.00492294	0.67584	0.972744	0.00528525	0.992433	0.997405	0.00652616
1419821_s_at	IDH1	isocitrate dehydrogenase 1 (NADP+), soluble	0.953598	0.0299722	0.00554607	0.684106	0.0291602	4.83236e-05	0.0016428	0.0180927	0.58643	0.00118738	0.157992	0.955662	0.00203743	0.433817	0.56302	0.00229964
1419872_at	csf1r	colony stimulating factor 1 receptor	0.0276381	0.000779368	0.000925253	0.0743563	0.383789	0.000342361	0.0054075	0.00723133	0.0159315	0.000682801	0.00975567	0.0307482	0.00133302	0.0320136	0.0162331	0.000747186
1419874_x_at	ZBTB16	zinc finger and BTB domain containing 16	0.0171449	0.000652213	0.00125072	0.0162673	0.00582301	0.000770812	0.00144057	0.00349943	0.0138221	0.000503372	0.00730456	0.0112551	0.000887948	0.0116765	0.0093544	0.000636051
1419905_s_at	HPGD	hydroxyprostaglandin dehydrogenase 15 (NAD)	0.616095	0.00518711	0.00158525	0.039004	0.0286608	0.00118721	0.00249059	0.00354725	0.0203318	0.000458959	0.018723	0.125796	0.0044814	0.0883537	0.0204491	0.000834734
1419917_s_at	tmed7	transmembrane emp24 protein transport domain containing 7	0.40184	0.000494693	0.00245029	0.154658	0.296355	0.000464808	0.000457775	0.00753234	0.216633	0.000381821	0.0161941	0.452106	0.0153474	0.0284414	0.145769	0.00339758
1419918_at	tmed7	transmembrane emp24 protein transport domain containing 7	0.0200297	0.000550367	0.000561104	0.0115768	0.00478114	0	0.00102452	0.0279521	0.0440488	4.64792e-05	0.0117109	0.0536648	0.00293041	0.0150906	0.0732579	0.00207042
1419971_s_at	SLC35A5	solute carrier family 35, member A5	0.477902	0.00285624	0.00443348	0.0642594	0.0184784	0.000925224	0.00145237	0.015661	0.790984	0.00114901	0.0327737	0.123168	0.0044981	0.0583359	0.165644	0.00200075
1419974_at	SCP2	sterol carrier protein 2, liver	0.115444	0.000989478	0.00108458	0.0304747	0.0431548	0.000505976	0.00140012	0.00317192	0.0297124	0.00026579	0.0104156	0.59895	0.0118699	0.0244595	0.106991	0.00575038
1419975_at	SCP2	sterol carrier protein 2, liver	0.0127507	0.000564259	1.65823e-06	0.0110524	0.00584033	4.42146e-14	6.80206e-11	0.0274535	0.0449654	0.000931279	0.0125206	0.0649073	0.00218448	0.012531	0.0309101	0.0010424
1420332_x_at	LCE1D	late cornified envelope 1D	0.0133365	3.32817e-05	0.000841855	0.0121059	0.00470475	9.52654e-05	0.00285754	0.0111646	0.117218	0.00217226	0.0508483	0.0258632	0.00113126	0.0362276	0.0149368	7.7312e-06
1420365_a_at	Gm5778	predicted gene 5778; similar to heterogeneous nuclear ribonucleoprotein A2/B1; heterogeneous nuclear ribonucleoprotein A2/B1	0.962792	0.0286203	0.0117566	0.95201	0.0478168	0.00344886	0.00959197	0.556189	0.939414	0.00151157	0.745993	0.997668	0.00690052	0.892881	0.75843	0.286718
1420368_at	DENR	density-regulated protein	0.952509	0.00449025	0.00387308	0.997191	0.198937	0.00315815	0.00824096	0.617419	0.999821	0.00375684	0.822892	0.996658	0.00975215	0.999403	0.998349	0.00504097
1420376_a_at	Gm3835	predicted gene 14383; predicted gene 3835; predicted gene 14384; predicted gene 12950; predicted gene, 670915; H3 histone, family 3A; predicted gene 12657; predicted gene 6132; predicted gene 10257; predicted gene 7227; H3 histone, family 3B; predicted gene 6128; similar to histone; predicted gene 1986; predicted gene 6186; hypothetical protein LOC676337; predicted gene 6421; predicted gene 2198;…	0.0802547	0.00110727	0.00250905	0.183916	0.0221154	0.000938913	0.00323826	0.00658727	0.243113	0.00103263	0.0501445	0.527261	0.0075271	0.0172596	0.0289661	0.000667017
1420379_at	Slco1a1	solute carrier organic anion transporter family, member 1a1	0.0414277	0.000478855	0.000536576	0.032108	0.00678642	0.00218741	0.00228008	0.00865632	0.0223223	0	0.0116295	0.0229942	0.00370045	0.0177179	0.014605	0.000474023
1420438_at	ORM2	orosomucoid 2	0.00971049	0.00136928	0.00516051	0.0857597	0.00613326	0.0026155	0.00227827	0.00291096	0.0108086	0.000531868	0.00690918	0.0171849	0.00139648	0.0237714	0.0364981	0.00153073
1420447_at	SULT1E1	sulfotransferase family 1E, member 1	0.0371213	0.000876909	0.00308352	0.20522	0.148113	0.00132278	0.0405252	0.00335155	0.0193602	0.000979838	0.0174875	0.0573873	0.00725459	0.0144978	0.0139787	3.32598e-06
1420465_s_at	Mup14	predicted gene 12809; predicted gene 2068; predicted gene 12549; predicted gene 13514; major urinary protein 2; predicted gene 13513; major urinary protein 1; predicted gene 12561; predicted gene 12546; novel member of the major urinary protein (Mup) gene family; predicted gene 2024; predicted gene 12557; predicted gene 14076; predicted gene 12552; major urinary protein LOC100048885; predicted ge…	0.0281259	0.000716785	0.000432954	0.0183313	0.195549	0.0112327	0.0883697	0.002629	0.0164227	0.000632308	0.0136634	0.0168113	2.54334e-05	0.0131841	0.0119568	0
1420473_at	mtpn	myotrophin	0.929562	0.00351598	0.00326857	0.901687	0.228935	0.00317816	0.00756168	0.776996	0.973268	0.0142346	0.876047	0.969596	0.0405754	0.899496	0.80147	0.226973
1420474_at	mtpn	myotrophin	0.999504	0.0115812	0.0141881	0.943874	0.303074	0.00691611	0.0100208	0.877058	1	0.00404265	0.979767	0.990543	0.0113356	1	0.976155	0.0393182
1420525_a_at	OTC	ornithine transcarbamylase	0.911249	0.00106922	0.00143923	0.0955606	0.933063	0.00495388	0.618358	0.0175874	0.546433	0.000900858	0.433831	0.16514	0.004426	0.922194	0.90722	0.0133154
1420541_at	RDH16	retinol dehydrogenase 16	0.0542031	0.00711495	0.0397208	0.189899	0.136936	0.000943942	2.55081e-05	0.00386191	0.0178779	0.000389884	0.00986498	0.0193569	0.000654341	0.0250401	0.0201289	0.000543973
1420603_s_at	Raet1b	retinoic acid early transcript 1E; retinoic acid early transcript beta; retinoic acid early transcript 1, alpha; retinoic acid early transcript delta; retinoic acid early transcript gamma	0.00954863	0.00632228	0.00116711	0.0290334	0.00864201	0.00259691	0.00120668	0.00693161	0.0137624	0.000507915	0.00707036	0.0150479	0.00121169	0.0179941	0.0392084	0.00181325
1420609_at	LOC100045448	membrane-associated ring finger (C3HC4) 7; similar to axotrophin	0.832873	0.00248129	0.00720078	0.61458	0.537467	0.00626606	0.00273155	0.192371	0.97941	0.00213157	0.641709	0.984511	0.0162475	0.966988	0.909647	0.110186
1420614_at	DYNLT3	dynein light chain Tctex-type 3	0.963898	0.00196956	0.00137937	0.137139	0.846119	0.00150204	0.0138228	0.0739607	0.949101	0.00178538	0.692833	0.467008	0.00807211	0.898268	0.943563	0.0608617
1420618_at	CPEB4	cytoplasmic polyadenylation element binding protein 4	0.487816	0.00462989	0.00751902	0.0784354	0.177886	0.000732616	0.00808744	0.00782849	0.0812058	0.00100282	0.0112147	0.133799	0.000867508	0.0521762	0.220302	0.0116946
1420619_a_at	aes	amino-terminal enhancer of split	0.038487	0.000949172	0.0158888	0.239429	0.656862	0.000815964	0.00904665	0.00453964	0.0463743	0.00112886	0.00853898	0.0188924	0.0010503	0.0356898	0.019908	0.000670511
1420628_at	LOC100045958	similar to hCG45299; purine rich element binding protein A	0.987292	0.00795083	0.00811145	0.98821	0.0871086	0.00882933	0.00986183	0.976539	1	0.00689277	0.954278	0.988299	0.0267796	0.997386	0.974233	0.0407182
1420654_a_at	GBE1	glucan (1,4-alpha-), branching enzyme 1	0.632598	0.0184223	0.0126908	0.0908268	0.0503444	0.000857938	0.000376033	0.00855871	0.149269	0.00171997	0.0151574	0.233281	0.0018154	0.0284737	0.117979	0.00335704
1420722_at	Elovl3	elongation of very long chain fatty acids (FEN1/Elo2, SUR4/Elo3, yeast)-like 3	0.0306985	0.0050236	0.0420538	0.631767	0.0108386	0.0367944	0.0502103	0.00610664	0.0165267	0.000179858	0.0266938	0.0308765	0.00160833	0.0173072	0.0262344	3.33543e-05
1420772_a_at	TSC22D3	TSC22 domain family, member 3	0.0462698	0.00338147	0.00101885	0.0377521	0.00484459	0.0021556	0.00796549	0.00286908	0.0107139	0	0.0117034	0.0501329	0.00174799	0.0398644	0.0192003	0.00170357
1420810_at	LOC100048622	RIKEN cDNA 1500003O03 gene; similar to EF-hand Ca2+ binding protein p22	0.192991	0.000252622	0.0165631	0.142604	0.107687	3.90131e-05	0.0755803	0.00905103	0.086557	0.000544055	0.0165533	0.0247185	5.14891e-05	0.0328059	0.0547192	0.000181622
1420814_at	GDI2	predicted gene 4973; guanosine diphosphate (GDP) dissociation inhibitor 2	0.957633	0.00304446	0.00295716	0.955243	0.21701	0.00631895	0.00428233	0.724528	0.998359	0.00189895	0.274612	0.806451	0.0276009	0.998896	0.999448	0.00403985
1420828_s_at	LOC674211	predicted gene, EG546165; predicted gene 2423; hypothetical protein LOC674211; tyrosine 3-monooxygenase/tryptophan 5-monooxygenase activation protein, theta polypeptide	0.0393636	0.000783938	0.00392599	0.0505078	0.0128554	0.00114838	0.000898153	0.00516602	0.247791	0.0060094	0.083854	0.018792	0.000882392	0.0343075	0.0115906	0.000450638
1420831_at	Qsox1	quiescin Q6 sulfhydryl oxidase 1	0.0169668	0.0230477	0.0304828	0.079774	0.0205888	0.000767503	0.00136203	0.00457678	0.0112565	0.000617142	0.0100293	0.0129353	0.000834331	0.0272267	0.0124031	0.000608449
1420867_at	Tmed2	transmembrane emp24 domain trafficking protein 2; predicted gene 10698; predicted gene 7318	0.160705	0.00132317	0.0321826	0.748587	0.22808	0.00270377	0.0012242	0.0218032	0.774264	0.0042371	0.0843472	0.332313	0.00979853	0.431188	0.292502	0.00136423
1420920_a_at	Gm8230	predicted gene 5823; ADP-ribosylation factor 1; predicted gene 8230	0.02574	0.000842448	0.00777697	0.0843308	0.0222466	0.00105254	0.000961333	0.00377618	0.0623188	0.00519042	0.0879108	0.0172403	0.00105128	0.0484388	0.0127131	0.000515668
1420952_at	SON	Son DNA binding protein	0.0417622	0.00100698	0.000614473	0.0325964	0.634754	0.0010843	0.00167978	0.0142117	0.172654	0.000717824	0.0147522	0.0404268	0.00350804	0.0243397	0.105566	0.00114641
1420966_at	SLC25A15	solute carrier family 25 (mitochondrial carrier ornithine transporter), member 15	0.0839372	6.76465e-09	0.00103749	0.0207705	0.00895546	0.00318037	0.0172561	0.00369815	0.0305951	0.00130845	0.0141191	0.0178483	0.000884941	0.0263511	0.0122941	0
1420984_at	PCTP	phosphatidylcholine transfer protein	0.0444164	0	0.000507702	0.00998624	0.00456331	0.00191002	0.00132454	0.00293551	0.00990311	1.11068e-09	0.00639792	0.00941051	0.000938504	0.0137245	0.00985205	2.11887e-10
1420997_a_at	gpi1	glucose phosphate isomerase 1	0.00985711	0.000538595	0.000483733	0.00939696	0.00374604	0.00136825	0.00700293	0.00336978	0.009631	0.000626939	0.00729195	0.0106838	0.000755377	0.00953104	0.0118724	0.000544236
1421011_at	HSD17B11	hydroxysteroid (17-beta) dehydrogenase 11	0.0381131	0.000455283	0.00573951	0.0682572	0.542854	0.923413	0.00441136	0.00639802	0.0371436	0.000126532	0.0149897	0.036892	0.00407959	0.192594	0.0357693	1.742e-07
1421026_at	LOC100048021	guanine nucleotide binding protein, alpha 12; similar to Guanine nucleotide-binding protein alpha-12 subunit (G alpha-12)	0.0220898	0.00101628	0.00330947	0.054992	0.023967	1.26867e-06	0.00016417	0.00421885	0.0761664	0.00204711	0.0682704	0.0117393	0.000846341	0.0177015	0.0121071	2.83699e-09
1421040_a_at	gstA2	glutathione S-transferase, alpha 2 (Yc2)	0.0233478	0.000836855	3.41241e-05	0.0164865	0.00610282	2.32178e-09	0.00466288	0.00416503	0.0156013	0	0.0102755	0.430156	0.00840593	0.0233758	0.0151103	0.000364958
1421041_s_at	Gm3776	predicted gene 3776	0.0109068	0.00054994	0	0.010125	0.00494118	0.000726654	0.0024181	0.00291447	0.0112166	0.000476052	0.0117878	0.0611037	0.00224333	0.0112571	0.0105262	0.000572852
1421074_at	Cyp7b1	cytochrome P450, family 7, subfamily b, polypeptide 1	0.0133509	0.00619934	0.00757909	0.0537252	0.00356398	0.00337928	0.005084	0.00293126	0.0119793	0.00051471	0.00601011	0.0127982	0.000909637	0.0105253	0.0237051	0.00108153
1421075_s_at	Cyp7b1	cytochrome P450, family 7, subfamily b, polypeptide 1	0.0120961	0.0210294	0.0518996	0.114207	0.0055805	0.00327122	0.00586413	0.00293013	0.0189878	4.91551e-05	0.00853128	0.0121557	0.000892604	0.0145092	0.0281771	0.00117818
1421092_at	SERPINA12	serine (or cysteine) peptidase inhibitor, clade A (alpha-1 antiproteinase, antitrypsin), member 12	0.029232	0.000590339	0.00053429	0.01661	0.00749374	0.000945005	0.00399762	0.00420355	0.0163167	0.00065784	0.0110837	0.682038	0.00459789	0.0494084	0.0193957	0.000720959
1421108_at	Cml2	camello-like 2	0.0288746	1.51416e-05	0.00419415	0.0585889	0.00944451	0.00195861	0.00608118	0.00276587	0.0219592	0.00158531	0.0579492	0.0108544	2.8423e-08	0.0208754	0.0098272	0.000566983
1421116_a_at	rtn4	reticulon 4	0.13388	0.00326635	0.0238308	0.698592	0.0167495	0.00351302	0.00753136	0.00237289	0.23383	0.000829838	0.0355497	0.705315	0.0118211	0.207847	0.203469	0.000156313
1421144_at	RPGRIP1	retinitis pigmentosa GTPase regulator interacting protein 1	0.170634	0.00430975	0.0127645	0.790196	0.0185036	0.00201208	0.0262396	0.00686403	0.0390348	0.000706047	0.0216905	0.0380766	5.13499e-05	0.0998837	0.0455352	0.00152658
1421182_at	Clec1b	C-type lectin domain family 1, member b	0.0148578	0.000744367	0.000732501	0.0150154	0.00589814	3.04719e-06	0.0116884	0.00440047	0.0322929	0.00123018	0.0357137	0.255774	0.00514237	0.0201073	0.0298636	0.000225064
1421258_a_at	PKLR	pyruvate kinase liver and red blood cell	0.0139643	0.000224574	0	0.043935	0.0106732	0.0021591	0.00164213	0.00309281	0.0255151	0.00116288	0.00710335	0.0749801	0.00154316	0.0183609	0.0106642	4.78484e-06
1421382_at	PRLR	prolactin receptor	0.224174	0.0205873	0.0475404	0.390281	0.0247561	0.000421587	0.00213949	0.00512765	0.0156504	9.75069e-05	0.018248	0.0176359	0.00176895	0.11732	0.0213636	0.000834695
1421425_a_at	RCAN2	regulator of calcineurin 2	0.0627304	0.000855611	0.00786862	0.343693	0.120364	0.000400321	0.00259441	0.00381566	0.014443	0	0.00845513	0.0224725	0.00175655	0.0337153	0.014971	0.000122303
1421430_at	RAD51L1	RAD51-like 1 (S. cerevisiae)	0.0174055	0.000983259	0.00088848	0.0175172	0.00527459	0.0424938	0.0066268	0.00430167	0.0216835	0.000902699	0.00986569	0.0549408	0.0018927	0.0228399	0.0295832	0.00162261
1421534_at	LOC14210	hypothetical LOC14210	0.0490679	0.000944897	0.00256684	0.896726	0.0954749	3.48798e-05	0.00182178	0.0108252	0.256291	0.00128386	0.0245626	0.662546	0.0175296	0.0409723	0.158801	0.00450244
1421605_a_at	AQP9	aquaporin 9	0.088468	0.00405158	0.0230014	0.306564	0.0985771	0.000510638	0.00117033	0.00393631	0.108744	0.00108403	0.0207824	0.0805663	0.00474657	0.176753	0.0297189	0.000175382
1421669_at	Gm4794	predicted gene 4794; sulfotransferase family 3A, member 1	0.108365	0.00268522	0.00595142	0.115971	0.0603295	0.00159915	0.0432573	0.00311961	0.0134955	1.72218e-05	0.0183257	0.0171803	0.000758418	0.107377	0.0376488	1.18583e-05
1421754_at	AY036118	cDNA sequence AY036118	0.0149294	0.00131877	0.00116248	0.014604	0.0103739	0.0159724	0.00314425	0.00286573	0.0106185	0	0.00765508	0.0196905	0.000815842	0.0119673	0.0148086	0.00129097
1421821_at	Ldlr	low density lipoprotein receptor	0.0105805	0.00132165	0.000583216	0.0104295	0.00460878	0.00636182	0.00282483	0.00331875	0.0132368	0.000532992	0.0173468	0.0216288	0.000843158	0.0108987	0.00954823	0.000517306
1421840_at	ABCA1	ATP-binding cassette, sub-family A (ABC1), member 1	0.680381	0.0126592	0.00069009	0.971058	0.119264	0.000164185	0.00182894	0.391994	0.981483	0.0200189	0.261412	0.99604	0.0129216	0.678799	0.976348	0.019048
1421849_at	STAG2	stromal antigen 2	0.131723	0.00793183	0.0013055	0.0450593	0.0410558	0.00143182	0.00149381	0.00572317	0.085141	0.000124862	0.0142963	0.513002	0.0201056	0.0460591	0.592154	0.0268389
1421871_at	SH3BGRL	SH3-binding domain glutamic acid-rich protein like	0.85825	0.0127118	0.00553052	0.397288	0.816961	0.000935972	0.00332611	0.0320955	0.999788	0.00271054	0.168616	0.923531	0.0813196	0.921824	0.950663	0.0290123
1421889_a_at	aplp2	amyloid beta (A4) precursor-like protein 2	0.0901788	0.00135714	0.0163114	0.463268	0.197578	0.000938909	0.000349279	0.0107472	0.59761	0.00402079	0.0400871	0.204893	0.0176217	0.141661	0.142725	0.000682228
1421895_at	Gm2223	eukaryotic translation initiation factor 2, subunit 3, structural gene X-linked; similar to translation initiation factor eIF-2 gamma subunit; predicted gene 2223	0.0652105	0.00317559	0.00895293	0.21537	0.762046	1.62143e-07	0.00184994	0.0132479	0.190011	0.000246113	0.0178751	0.0775398	0.00599921	0.129828	0.028355	0.000907729
1421921_at	serpina3m	serine (or cysteine) peptidase inhibitor, clade A, member 3M	0.010785	0.000942964	0.00526601	0.0368549	0.00410375	0.000755554	0.000980629	0.0110913	0.0325022	0.00064557	0.00730284	0.0112701	0.00107857	0.0767247	0.0393929	0.001675
1421955_a_at	NEDD4	neural precursor cell expressed, developmentally down-regulated 4	0.0114898	0.00119119	0.0013749	0.0446189	0.0078829	0.00108268	0.000955707	0.00670803	0.0281549	0.0012829	0.0838346	0.013331	0	0.0101697	0.0140211	0.000725275
1421983_s_at	Hnf4a	hepatic nuclear factor 4, alpha	0.0852591	0.000733625	0.0115242	0.112383	0.059279	0.00097955	0.0058353	0.00351247	0.0333601	0.00236324	0.0580381	0.0156978	9.89549e-05	0.115946	0.018686	4.20558e-05
1421989_s_at	PAPSS2	3'-phosphoadenosine 5'-phosphosulfate synthase 2	0.310461	0.0217502	0.0140652	0.650343	0.287549	0.000244633	0.000165891	0.00873555	0.204961	0.00106014	0.021534	0.0939461	0.00177833	0.263541	0.201038	0.00107453
1421991_a_at	igfbp4	insulin-like growth factor binding protein 4	0.0543121	0.00145139	0.027434	0.660348	0.111096	0.00226561	0.00714198	0.00761355	0.0301253	0.00108457	0.0200211	0.022386	1.78103e-05	0.137134	0.0242154	0
1421992_a_at	igfbp4	insulin-like growth factor binding protein 4	0.0397171	0.0010278	0.011095	0.195496	0.0610581	0.00131276	0.0398156	0.005957	0.0142008	6.58523e-05	0.0124784	0.0245933	0.00119832	0.0405932	0.0134577	0.000508055
1422064_a_at	ZBTB20	zinc finger and BTB domain containing 20	0.853088	0.00595966	0.000600283	0.999907	0.0914627	0.0034396	0.00611131	0.860766	0.999272	0.00926997	0.690306	0.980028	0.0041161	0.828631	0.97594	0.010886
1422070_at	ADH4	alcohol dehydrogenase 4 (class II), pi polypeptide	0.0112703	0.00671626	0.00953121	0.137644	0.0072596	0.00320449	0.0140835	0.00305563	0.0297055	0.000476052	0.00958225	0.0130308	0.00154587	0.0107098	0.0121274	0.000520845
1422076_at	Acot4	acyl-CoA thioesterase 4	0.0345578	0.0128067	0.00455601	0.0584529	0.0160591	0.000681281	0.00101986	0.00315133	0.0117209	0.000460981	0.00762448	0.0112592	0.000842364	0.153754	0.0234517	0.00102699
1422100_at	Cyp7a1	cytochrome P450, family 7, subfamily a, polypeptide 1	0.154354	0.00656939	0.00578338	0.362092	0.0356893	3.55493e-05	0.0010608	0.00402227	0.0240289	0.000863671	0.0104587	0.0236913	0.000649205	0.0187231	0.0176212	0.00043861
1422185_a_at	cyb5r3	cytochrome b5 reductase 3	0.0387812	0.00106273	0.00208158	0.0887293	0.0155092	0.00415188	0	0.00351733	0.0350735	0.000814257	0.0077168	0.0426226	0.00137078	0.0157656	0.0142244	0.000550554
1422198_a_at	SHMT1	serine hydroxymethyltransferase 1 (soluble)	0.0198853	0.0285437	0.0251541	0.306923	0.0106753	0.000793094	0.000438195	0.00396534	0.0282316	0.00091559	0.0101782	0.0281846	0.000626192	0.266124	0.0270399	0.000282432
1422230_s_at	LOC100047711	similar to Cytochrome P450, family 2, subfamily a, polypeptide 4	0.170763	0.00117702	0.000487732	0.0161	0.0052702	0.000859466	0.00283219	0.00331174	0.0117484	1.46971e-06	0.00719512	0.14502	0.0128799	0.0407992	0.0183871	2.416e-06
1422257_s_at	Cyp2b10	cytochrome P450, family 2, subfamily b, polypeptide 10	0.0505071	0.000532092	0.00230971	0.0736627	0.0090175	1.54221e-05	0.0197919	0.00580785	0.0215529	0.000441688	0.013097	0.0643083	0.164731	0.0251446	0.0334906	0.0018791
1422414_a_at	Gm7308	predicted gene 7743; calmodulin 3; calmodulin 2; calmodulin 1; predicted gene 7308	0.0199983	0.000595453	0.000786634	0.0164036	0.00467302	0.00128661	5.98094e-05	0.0044745	0.0288991	0.00128957	0.0150973	0.0315931	0.00216652	0.0135231	0.017194	0.000705699																								141
1422434_a_at	2210010C04Rik	RIKEN cDNA 2210010C04 gene	0.0249642	0.000537857	0.000500239	0.00966462	0.00413334	0.00161239	0.00133975	0.00459131	0.0144143	0.000930887	0.00685012	0.0101897	0.00227849	0.0100567	0.010126	0
1422478_a_at	ACSS2	acyl-CoA synthetase short-chain family member 2	0.0303805	0.00342125	0.000531448	0.0130717	0.00380567	0.00101419	0.0013015	0.00308396	0.0100832	0	0.00791985	0.0412938	0.00115758	0.0127659	0.0108584	0.0005104
1422479_at	ACSS2	acyl-CoA synthetase short-chain family member 2	0.0455504	0.00408764	0.00110476	0.0498494	0.00908753	7.69414e-05	5.37409e-05	0.00328423	0.0124591	0.000588897	0.00673443	0.0570916	0.00168912	0.0190824	0.0125889	0
1422506_a_at	Cstb	cystatin B	0.0150696	0.000652938	0.000772273	0.0185849	0.0262188	0.00360479	0.00400037	0.04885	0.0291849	0.000942533	0.00891763	0.0145567	0.00139538	0.0129914	0.0109299	0
1422526_at	ACSL1	acyl-CoA synthetase long-chain family member 1	0.0350373	0.000798246	0.000534077	0.00966168	0.00701964	0.000882148	0	0.00293426	0.0320562	0.000735047	0.00669163	0.0246719	0.00176932	0.0234237	0.0101491	0
1422537_a_at	ID2	inhibitor of DNA binding 2	0.010823	0.00057981	0.000589076	0.0164182	0.00446006	0.0018484	0	0.00483686	0.0301945	0.00625583	0.0164139	0.0125749	0.000890241	0.0176158	0.0120881	0.000573826
1422555_s_at	Gna13	guanine nucleotide binding protein, alpha 13	0.0139632	0.00675919	0.00301915	0.042448	0.155729	0.0010092	0.00106129	0.00383194	0.0202041	0.000457921	0.00967201	0.0165681	0	0.0119592	0.026451	0.000717171
1422557_s_at	Mt1	metallothionein 1	0.0142481	0.00267647	0.0234736	0.264582	0.0145872	0.0013722	0.00473495	0.00556069	0.0131526	2.11291e-06	0.00919109	0.0145624	0.00143889	0.0226997	0.0132199	0.000495021
1422603_at	Rnase4	ribonuclease, RNase A family 4	0.0350576	0.00161199	0.0274929	0.378168	0.0176597	0.759058	0.0104827	0.00252649	0.028013	0.000100038	0.0141907	0.0315679	0.0015706	0.0261023	0.0204541	7.89099e-05
1422604_at	UOX	urate oxidase	0.0147156	0.00259823	0.00113882	0.00945157	0.00368735	0.00459703	0.00311129	0.00275915	0.0104031	1.39992e-05	0.00954559	0.0102307	0	0.00900374	0.015971	0.000769348
1422631_at	ahr	aryl-hydrocarbon receptor	0.970503	0.00242116	0.00257618	0.999448	0.0432349	0.00566705	0.0166461	0.738501	0.963043	0.0524615	0.753499	0.999021	0.00857792	0.947254	0.938329	0.0449738
1422660_at	RBM3	predicted gene 15453; RNA binding motif protein 3	0.0150876	0.000784557	0.000459148	0.0388238	0.0123082	0.001833	0.000944261	0.0136365	0.0284626	0.000342226	0.00967295	0.102965	0.00332288	0.0347874	0.545178	0.0276973
1422677_at	DGAT2	diacylglycerol O-acyltransferase 2	0.0322624	0.0805418	0.0548619	0.570203	0.0216091	0.00074113	0.00277286	0.00324017	0.0451564	0.00101424	0.0137147	0.0460874	0.00139651	0.486397	0.0430409	0.000462878
1422704_at	GYK	glycerol kinase	0.243263	0.0679956	0.0176042	0.125491	0.0441807	0.00025357	1.55007e-05	0.00433675	0.144435	6.66671e-05	0.00990889	0.403947	0.0172267	0.015907	0.0521199	0.00145733
1422715_s_at	acp1	predicted gene 7756; acid phosphatase 1, soluble; predicted gene 9723; similar to acid phosphatase 1, soluble; similar to protein-tyrosine-phosphatase	0.994949	0.00876026	0.00939347	0.975325	0.297033	0.00461797	0.0156151	0.997382	1	0.00444689	0.999031	0.681359	0.0213962	1	1	0.00462796
1422794_at	cul3	cullin 3	0.99667	0.00713984	0.00750513	0.973095	0.565564	0.00574074	0.00920685	0.971547	1	0.00416267	0.99233	0.999577	0.00487639	1	0.951158	0.0863917
1422815_at	C9	complement component 9	0.0779779	0.000659918	0.000486507	0.0174098	0.0137663	0.0693219	0.431051	0.00334703	0.014128	1.12989e-05	0.00907899	0.0322554	0.000812502	0.0391966	0.0290043	0.00111795
1422845_at	Canx	calnexin	0.671963	0.00062685	0.00119729	0.767206	0.348523	0.002014	0.00118486	0.147594	0.976222	0.000954063	0.107587	0.498902	0.0704317	0.835636	0.812352	0.00179885
1422880_at	Sypl	synaptophysin-like protein	0.969831	0.00245384	0.00717408	0.973268	0.151868	0.0051159	0.0117827	0.509964	0.997974	0.00668252	0.787847	0.939247	0.0308043	0.998359	0.996776	0.0082865
1422881_s_at	Sypl	synaptophysin-like protein	0.511501	0.00140146	0.00173486	0.524801	0.0925756	0.000287574	0.00107259	0.00903072	0.238433	0.00268403	0.0351411	0.580098	0.0044748	0.0565637	0.459279	0.00561395
1422925_s_at	Acot3	acyl-CoA thioesterase 3	0.0455874	0.00950147	0.00289134	0.0467334	0.0191568	0.00077797	0.00141405	0.00381263	0.0113831	0	0.0174934	0.0126326	1.00267e-06	0.0409499	0.0240961	0.00107177
1422943_a_at	Hspb1	heat shock protein 1	0.0482771	0.00702206	0.0284378	0.782041	0.0250217	0.0727115	0.0802893	0.00381187	0.0216246	1.16915e-05	0.0124453	0.0215194	2.7981e-05	0.0356665	0.295873	0.00223672
1422962_a_at	psmb8	proteasome (prosome, macropain) subunit, beta type 8 (large multifunctional peptidase 7)	0.014962	0.00121257	0.000612668	0.0926875	0.585859	0.000407242	0.000889181	0.00625709	0.0193277	0.00277087	0.0140911	0.0158897	0.00213792	0.0149995	0.0137189	7.21877e-05
1422973_a_at	Thrsp	thyroid hormone responsive SPOT14 homolog (Rattus)	0.0217021	0.0162837	0.00224083	0.0699909	0.00673484	0.00142283	0.00138054	0.00345784	0.011146	0.000526706	0.013621	0.0326116	0.00118345	0.0102041	0.0198248	0.000802334
1422993_s_at	thoc4	THO complex 4	0.00968388	0	0	0.0172814	0.0037185	6.60313e-06	0.000995076	0.00287583	0.0134692	0.000111306	0.00917679	0.0238693	0.000741474	0.0906968	0.0135403	0.000625462
1422997_s_at	LOC100044830	similar to acyl-CoA thioesterase	0.0505425	0.000730417	0.000549847	0.00973735	0.00423848	0	0.0012368	0.0029032	0.00981737	0.000516116	0.00854902	0.0149369	0.00103208	0.0336399	0.0116035	0.00058948
1423034_at	Txndc17	thioredoxin domain containing 17	0.0560506	0.000619436	0.00180679	0.0190286	0.0135311	2.57674e-05	0.00124279	0.00416994	0.0241084	0.00104436	0.00968461	0.0108635	0.00095406	0.0263127	0.0129145	0.000546801
1423041_a_at	BZW1	predicted gene 11652; predicted gene 5191; basic leucine zipper and W2 domains 1	0.913263	0.00935798	0.00242386	0.989738	0.363931	0.0047624	0.00658931	0.0591984	1	0.00558767	0.115558	0.953936	0.0670627	0.997822	1	0.0048015
1423042_at	DDX3X	DEAD/H (Asp-Glu-Ala-Asp/His) box polypeptide 3, X-linked	0.986879	0.00998884	0.00989076	0.711682	0.452289	0.0130122	0.0122394	0.387885	0.999787	0.00248541	0.896775	0.780321	0.016061	0.999157	0.99826	0.0039364
1423043_s_at	DDX3X	DEAD/H (Asp-Glu-Ala-Asp/His) box polypeptide 3, X-linked	0.895371	0.0234055	0.0490039	0.263643	0.087755	0.000637537	0.000229482	0.0352074	0.511308	0.00289719	0.0379829	0.119289	0.000199422	0.780944	0.815258	0.0048614
1423051_at	Hnrnpu	heterogeneous nuclear ribonucleoprotein U	0.918256	0.00447636	0.00395081	0.992513	0.0633262	0.00602593	0.0124462	0.971768	1	0.00389202	0.900609	0.992856	0.00722348	0.999997	0.996751	0.00818499
1423053_at	ARF4	ADP-ribosylation factor 4	0.0210235	0.000979677	0.00999838	0.131569	0.0620258	0.00732871	0.00110114	0.00268488	0.065527	0.00240287	0.0556354	0.0618626	0.00316072	0.0299388	0.0128429	1.3612e-07
1423073_at	Gm5867	cytidine monophosphate (UMP-CMP) kinase 1; predicted gene 5867	0.889474	0.0028097	0.00187829	0.303715	0.86615	0.00158461	0.00576746	0.0795805	0.998171	0.00755417	0.403122	0.928222	0.0173576	0.820304	0.969045	0.0231654
1423078_a_at	SC4MOL	sterol-C4-methyl oxidase-like	0.0269998	0.00264409	0.0017687	0.273652	0.0256977	0.000878836	1.26818e-05	0.00434697	0.0222268	0.000588024	0.00857859	0.0834291	0.00228394	0.0670663	0.02858	4.4651e-06
1423114_at	ube2d3	ubiquitin-conjugating enzyme E2D 3 (UBC4/5 homolog, yeast); similar to UBE2D3; predicted gene 4596; predicted gene 15361	0.191936	0.00258296	0.0253213	0.389162	0.477159	0.000138645	0.00119133	0.0107491	0.395276	0.00182406	0.0641689	0.29129	0.0113605	0.0972821	0.0901965	0.000213012
1423130_a_at	Gm12966	predicted gene 12966; splicing factor, arginine/serine-rich 5 (SRp40, HRS)	0.0424829	0	0.00187062	0.0155141	0.00399875	0.000617697	0.00111579	0.00276844	0.0129392	0	0.00667668	0.0157027	0.000783177	0.0121233	0.0101722	0
1423152_at	vapB	vesicle-associated membrane protein, associated protein B and C	0.0294029	0.00226403	0.0106346	0.0486984	0.932928	0.00148834	0.00205297	0.0153212	0.0659365	0.00170734	0.014339	0.0214924	0.00129331	0.0242269	0.020904	0.000963761
1423153_x_at	LOC100048018	complement component factor h; similar to complement component factor H	0.0182938	0.000475297	0.00027181	0.0158668	0.00374635	0.00295686	0.00280562	0.00458733	0.0178942	2.59719e-05	0.0334739	0.129251	0.00243135	0.0751998	0.355307	0.0198508
1423156_at	Gnpnat1	glucosamine-phosphate N-acetyltransferase 1; predicted gene 7623	0.0585191	0.000847987	0.0154643	0.439021	0.133749	0.000463076	0.0012954	0.00438122	0.201378	0.000906895	0.0287098	0.0533687	0.000408228	0.0308706	0.0181973	1.73733e-05
1423159_at	dld	dihydrolipoamide dehydrogenase	0.995726	0.0153699	0.0406355	0.635699	0.907311	0.00332693	0.0103107	0.431959	1	0.00338836	0.827726	0.974525	0.0136264	1	0.974885	0.0375677
1423166_at	CD36	CD36 antigen	0.979816	0.00232198	0.00365004	0.481708	0.730629	0.0051178	0.00226938	0.310528	0.988882	0.0380144	0.271182	0.725525	0.01365	0.933413	0.952882	0.011731
1423176_at	Tob1	transducer of ErbB-2.1	0.084412	0.00088341	0.000527003	0.0111405	0.00480099	0.000710706	0.00156229	0.00542526	0.0370273	0.00101771	0.00789739	0.0172561	0.000800213	0.0161388	0.0998888	0.00331763
1423201_at	NCOR1	nuclear receptor co-repressor 1	0.340284	0.00233781	0.00113593	0.999275	0.0200311	0.00114982	0.00344708	0.109796	0.962585	0.00703589	0.0551349	0.945707	0.0235983	0.212883	0.484096	0.00558476
1423215_at	Gm14045	signal peptidase complex subunit 2 homolog (S. cerevisiae); predicted gene 14045	0.0118954	0.0200513	0.00270826	0.012641	0.00401547	0.000958439	0.00112468	0.00314999	0.011055	0	0.0169903	0.0114067	0.000815634	0.0111303	0.0105259	0.00053906
1423233_at	cebpd	CCAAT/enhancer binding protein (C/EBP), delta	0.0099814	0	0.00159746	0.0173597	0.00620386	3.23204e-05	0.00117335	0.00344101	0.0454586	0	0.00728488	0.0106366	0.00187538	0.0139604	0.0101811	0.000570604
1423237_at	GALNT1	UDP-N-acetyl-alpha-D-galactosamine:polypeptide N-acetylgalactosaminyltransferase 1	0.878569	0.00237435	0.00151455	0.968255	0.217642	0.00513542	0.00730488	0.0757804	1	0.00287901	0.593736	0.996155	0.011173	0.999999	0.999337	0.00469421
1423244_at	Cyp2c68	cytochrome P450, family 2, subfamily c, polypeptide 68	0.51059	0.0561519	0.029599	0.638495	0.0591389	0.000482066	0.000572336	0.00598276	0.0395841	0.000262599	0.031497	0.0317033	0.000745078	0.387426	0.0539727	0.00346302
1423257_at	Cyp4a14	cytochrome P450, family 4, subfamily a, polypeptide 14	0.0233561	0.000860949	0.00198942	0.0131829	0.00467702	0.000691549	0.00123493	0.00324052	0.0102076	0.000630244	0.00718878	0.0195906	4.95607e-05	0.0174873	0.0104702	0.000533338
1423266_at	2810405K02Rik	RIKEN cDNA 2810405K02 gene	0.0272748	0.00106152	0.000551018	0.0339283	0.0134158	0.00123174	0.00117382	0.0108055	0.382073	0.00204993	0.044644	0.0817493	0.00939216	0.0467461	0.0262656	0.000655226
1423322_at	LIN7C	lin-7 homolog C (C. elegans)	0.356401	0.0032126	0.00229874	0.923567	0.187977	0.00278876	0.00707135	0.0471248	0.993168	0.00329941	0.104896	0.834802	0.0882392	0.981708	0.978876	0.00597501
1423331_a_at	LOC100047693	similar to cell adhesion molecule nectin-3 beta	0.0766944	0.0010728	0.00375025	0.0254085	0.00970548	0.000756261	0.00180806	0.00307363	0.0291839	0.00160192	0.0132186	0.0146042	0.00102867	0.062251	0.0135543	0.000649378
1423361_at	YME1L1	YME1-like 1 (S. cerevisiae)	0.465642	0.00214221	0.00491239	0.972609	0.174644	0.00350429	0.00791718	0.0503027	0.999711	0.008185	0.319462	0.990517	0.013826	0.949378	0.980701	0.0109653
1423418_at	LOC674674	similar to farnesyl diphosphate synthetase; farnesyl diphosphate synthetase; predicted gene 5873; predicted gene 8163; predicted gene 3571	0.0124269	0.000945185	0.000695941	0.0256301	0.00557288	0.00462177	0.00674314	0.00291951	0.0101351	4.89994e-05	0.00726627	0.0853776	0.00343843	0.0388574	0.0118259	0.000604327
1423423_at	PDIA3	protein disulfide isomerase associated 3	0.545412	0.0144147	0.00254807	0.998973	0.034306	0.00582624	0.00259903	0.528984	0.992043	0.000902168	0.627615	0.99394	0.00206665	0.872877	0.875195	0.00272416
1423436_at	GSTA3	glutathione S-transferase, alpha 3	0.0115685	1.18622e-07	0.00050943	0.0100927	0.00482457	0.00123216	0.00101783	0.00320963	0.011031	0.000609327	0.00666481	0.0116546	0.000802555	0.0305808	0.0109916	6.09057e-05
1423437_at	GSTA3	glutathione S-transferase, alpha 3	0.0217652	4.59428e-05	0.00144809	0.020922	0.00875917	0.000661928	0.00110845	0.00302202	0.0100965	0.000492203	0.00926332	0.0102367	0.000787779	0.0110446	0.00954639	0.000527964
1423439_at	PCK1	phosphoenolpyruvate carboxykinase 1, cytosolic	0.0523944	0.00434212	0.0043764	0.0915087	0.00563104	0.00177689	0.0290949	0.0037496	0.013072	8.09567e-09	0.008033	0.0734155	0.00217116	0.0268974	0.010596	0
1423444_at	ROCK1	Rho-associated coiled-coil containing protein kinase 1	0.133497	0.00606212	0.0040674	0.800742	0.125359	0.00148076	0.00229237	0.0233905	0.29344	0.00229006	0.0919996	0.984057	0.00264274	0.354261	0.900115	0.0375933
1423447_at	clpX	caseinolytic peptidase X (E.coli)	0.0208184	0.0012222	0.000801593	0.0120258	0.00391226	0.000956926	0.002661	0.00287974	0.0129691	0.00112468	0.00724744	0.00969402	1.14966e-07	0.0103358	0.0121438	0
1423451_at	PGRMC1	progesterone receptor membrane component 1	0.492815	1.85288e-05	0.00104395	0.0851244	0.298596	0.000362541	0.00461395	0.00686281	0.222607	0.00050225	0.0186253	0.244773	0.0331655	0.0589227	0.288973	0.00468853
1423459_at	COPS2	COP9 (constitutive photomorphogenic) homolog, subunit 2 (Arabidopsis thaliana)	0.937675	0.00438384	0.00896708	0.987157	0.388772	0.00393353	0.00839561	0.454314	1	0.0054596	0.59586	0.998153	0.0107324	1	1	0.00280562
1423462_at	tab2	mitogen-activated protein kinase kinase kinase 7 interacting protein 2	0.162676	9.57305e-05	0.000790418	0.0159841	0.0171486	0.00259261	0.0241747	0.00321344	0.0602946	0.0021801	0.0137013	0.0215227	0.000756949	0.01351	0.0477685	0.00128145
1423474_at	TOP1	topoisomerase (DNA) I	0.943593	0.0281381	0.00665284	0.920827	0.239169	0.000755981	0.00535267	0.625226	0.995657	0.00436693	0.86902	0.947218	0.0767514	0.942034	0.992921	0.0090669
1423523_at	aass	aminoadipate-semialdehyde synthase	0.531942	0.0011229	0.000475015	0.0207698	0.00961367	0.0452819	0.830894	0.00527007	0.0242153	0.000507683	0.0128657	0.028078	0.000792088	0.0461787	0.0407175	9.78758e-05
1423642_at	TUBB2C	tubulin, beta 2c, psuedogene 1; tubulin, beta 2C; tubulin, beta 2c, pseudogene 2	0.010709	0.0286776	0.00338481	0.0379568	0.0103513	0.0024281	0.00105625	0.0045513	0.0211438	0	0.00805724	0.0465261	0.012151	0.0110731	0.012868	0.000549117
1423645_a_at	Gm12183	DEAD (Asp-Glu-Ala-Asp) box polypeptide 5; predicted gene 12183	0.961464	0.0136633	0.0129193	0.936467	0.0685619	0.00396355	0.0153442	0.195973	0.968508	0.00144865	0.419574	0.970526	0.00269579	0.747806	0.767172	0.024761
1423662_at	ATP6AP2	ATPase, H+ transporting, lysosomal accessory protein 2	0.985791	0.00332684	0.00498591	0.654624	0.660221	0.00296582	0.00662337	0.537216	0.999985	0.00209027	0.760779	0.926238	0.0808457	0.999103	0.970205	0.0402527
1423669_at	COL1A1	collagen, type I, alpha 1	0.230642	0.000630803	0.0007605	0.0163557	0.0128892	0.0433229	0.614081	0.0063304	0.0241592	0.000900925	0.0151967	0.0199065	0.000302907	0.018146	0.0164134	0
1423680_at	Fads1	fatty acid desaturase 1	0.0130447	0.000901756	0.000779372	0.0191709	0.0044324	0.00251622	0.00265795	0.00305156	0.0100263	0.0004776	0.00728595	0.0161678	0.0012714	0.0216903	0.00972374	0.000529376
1423706_a_at	PGD	phosphogluconate dehydrogenase	0.0166879	0.000470559	0.000570601	0.0128436	0.00446316	0.205132	0.00293666	0.00264598	0.0168073	0.00101416	0.00861075	0.0231588	4.70656e-06	0.0156209	0.0249083	0.00110447
1423718_at	ak3	adenylate kinase 3	0.143668	0.000754305	0.00847223	0.188327	0.484707	0.000670892	0.0043299	0.0060774	0.283587	0.000223178	0.0361385	0.0382422	0.00132397	0.111272	0.0990648	0.00125803
1423744_x_at	Gm2223	eukaryotic translation initiation factor 2, subunit 3, structural gene X-linked; similar to translation initiation factor eIF-2 gamma subunit; predicted gene 2223	0.827268	0.0635344	0.08457	0.477851	0.13547	0.0015923	0.000778388	0.00978443	0.600018	0.00426883	0.125893	0.165934	0.0021936	0.397991	0.426158	0.000872595
1423747_a_at	PDK1	pyruvate dehydrogenase kinase, isoenzyme 1	0.0473947	0.000838865	0.000687628	0.020503	0.00847258	0.00101324	0.00172203	0.0289904	0.0467583	0.000312366	0.0434052	0.0358535	0.00101861	0.0263784	0.0197351	3.03251e-06
1423759_a_at	tmco1	transmembrane and coiled-coil domains 1	0.670932	7.44174e-05	0.00200964	0.0261367	0.0201909	0.00138679	0.0502981	0.0170992	0.12029	0.000786463	0.0136025	0.0204665	0.000162097	0.022321	0.114182	0.00258944
1423797_at	AACS	acetoacetyl-CoA synthetase	0.0104484	0.000696997	0.000488972	0.00943454	0.00379989	0.0110095	0.00754568	0.00295928	0.00987617	0.000476771	0.00991994	0.0257636	0.00125218	0.0118321	0.0103454	0
1423804_a_at	Gm7655	isopentenyl-diphosphate delta isomerase; similar to Isopentenyl-diphosphate delta isomerase; predicted gene 7655	0.178424	0.00394997	0.00195001	0.769258	0.131454	0.000374814	0.00161342	0.00691946	0.0326012	0.000898405	0.0191941	0.826444	0.0201195	0.109224	0.0933947	0.000401438
1423819_s_at	arl6ip1	ADP-ribosylation factor-like 6 interacting protein 1	0.0207309	0.00119351	0.00123248	0.0180248	0.00909695	0.000640783	0.00135979	0.00432057	0.0715621	0.00264744	0.0156702	0.0192815	0.00148121	0.0330821	0.0139208	1.34984e-05
1423828_at	FASN	fatty acid synthase	0.0116	0.0010477	3.09662e-05	0.0124863	0.00401087	0.026004	0.00566299	0.00302292	0.0109799	0.00050508	0.0105273	0.0495987	0.00111501	0.0101118	0.0104628	0.000525932
1423846_x_at	Gm5620	predicted gene 3756; tubulin, alpha 1B; predicted gene 5620; similar to alpha-tubulin isotype M-alpha-2; predicted gene 14150; predicted gene 3226	0.0465031	0.0163469	0.0206886	0.1708	0.11037	0.00457212	0.00194199	0.00515109	0.0365635	0.00080111	0.0236554	0.0112293	0.000865254	0.0254205	0.0128043	0.00060192
1423867_at	Serpina3k	serine (or cysteine) peptidase inhibitor, clade A, member 3K	0.105853	0.0103018	0.00121642	0.0310238	0.00884196	0.00361683	0.0615994	0.00500577	0.0216073	0.000749707	0.0152844	0.044379	1.28795e-05	0.026021	0.044075	0.00165981
1423883_at	ACSL1	acyl-CoA synthetase long-chain family member 1	0.02718	0.000643869	0.00102205	0.0214612	0.00538364	0.00155817	0.00165834	0.00306178	0.0111889	0	0.0137234	0.0156845	0.00102779	0.0100755	0.0126301	0
1423891_at	GSTT3	glutathione S-transferase, theta 3	0.129894	0.00438485	0.00180815	0.048245	0.00665816	8.00679e-05	0.0140635	0.00255192	0.0131534	0	0.0103871	0.1108	0.0271788	0.106498	0.0182792	2.52727e-05
1423909_at	Tmem176a	transmembrane protein 176A	0.0117336	0.000780373	0.0014668	0.0205622	0.00393058	0.000909225	0.00296068	0.00360894	0.010504	0.000480242	0.00638895	0.0127472	0.000937587	0.0096485	0.011073	7.53334e-06
1423959_at	ropn1l	ropporin 1-like	0.0152765	0.00239081	5.97964e-08	0.0733741	0.00676333	7.16201e-08	0.0010398	0.00239836	0.0144223	0.00044802	0.00675939	0.137964	0.0583723	0.313713	0.0325091	0.00119437
1423972_at	etfA	predicted gene 2893; electron transferring flavoprotein, alpha polypeptide	0.999897	0.00412918	0.00408993	0.894955	0.261372	0.00076858	0.0393966	0.917939	0.999894	0.00372547	0.98703	0.97355	0.00993996	1	0.99832	0.00715631
1423997_at	Gm5064	predicted gene 5064; cold shock domain containing E1, RNA binding	0.969849	0.00542049	0.00806568	0.798081	0.570845	0.00568882	0.0048054	0.654856	0.999881	0.0370394	0.744665	0.930319	0.0409312	0.992002	0.993213	0.0120187
1424041_s_at	LOC100044326	similar to Complement component 1, s subcomponent	0.180913	0.00048527	0.00288148	0.248994	0.0164213	0.000217306	0.00060628	0.00316822	0.0232054	9.50338e-05	0.00608111	0.434943	0.152043	0.0473831	0.0534312	0.000698133
1424105_a_at	PTTG1	pituitary tumor-transforming gene 1	0.110873	0.00114027	0.000582158	0.0242646	0.0103512	0.00100275	0.00327416	0.00640052	0.0322296	0.000105189	0.0142406	0.048816	0.00380643	0.0372494	0.134239	0.00578744
1424126_at	ALAS1	aminolevulinic acid synthase 1	0.0122129	0.00145178	0.00262201	0.236895	0.00684774	0.00107406	0.00218039	0.00345948	0.0115314	5.45379e-05	0.00973532	0.0118161	1.70845e-05	0.011594	0.0126092	0.000701663
1424139_at	LOC100046373	predicted gene 9392; similar to Raichu404X; RAS-related protein-1a	0.990259	0.00732252	0.0026102	0.523518	0.638507	0.00243905	0.0110734	0.599136	0.977182	0.00115176	0.794804	0.922338	0.0109475	0.94203	0.906854	0.110683
1424185_a_at	MORF4L1	predicted gene 6747; RIKEN cDNA A730098P11 gene; mortality factor 4 like 1; predicted gene 8663; predicted gene 4835	0.983483	0.00916231	0.0082852	0.931296	0.179491	0.0027212	0.00520003	0.0800879	0.998458	0.00274067	0.436602	0.996534	0.00134976	0.995724	0.999939	0.00201728
1424216_a_at	Papola	poly (A) polymerase alpha	0.293666	0.0014563	0.0256158	0.608631	0.261279	0.00470294	0.00137418	0.0232037	0.638818	0.0148319	0.0614379	0.503865	0.00598849	0.811194	0.843682	9.93627e-05
1424245_at	Ces2	carboxylesterase 2	0.0552824	0.00127465	0.00565332	0.054283	0.00494884	0.00379692	0.0595171	0.00362304	0.013645	0	0.00773196	0.0148456	0.00122352	0.0116193	0.0118006	0.000603621
1424266_s_at	AU018778	expressed sequence AU018778	0.0387519	0.000809608	0.00360328	0.0769847	0.0460827	0.000969702	0.99385	0.00604129	0.0213399	6.19978e-05	0.025507	0.0269606	0.00184104	0.0276782	0.0230454	0.000866284
1424273_at	Cyp2c70	cytochrome P450, family 2, subfamily c, polypeptide 70	0.088996	0.00107418	0.00823521	0.970916	0.0109512	0.00337521	0.0040039	0.00864984	0.0230522	6.4621e-06	0.0176839	0.0242755	0.00174147	0.276275	0.0409192	0.00188059
1424274_at	USO1	USO1 homolog, vesicle docking protein (yeast)	0.711235	0.0294651	0.00737482	0.63257	0.193376	0.00169509	0.00179227	0.0139013	0.549423	0.00188885	0.0547302	0.948995	0.00243191	0.36738	0.931601	0.0085773
1424296_at	GCLC	glutamate-cysteine ligase, catalytic subunit	0.0234873	0.00199071	0.0147762	0.14672	0.00606538	0.000683127	2.8311e-07	0.0034081	0.0158126	0.000903504	0.00743883	0.0172308	0.000990828	0.0111288	0.0115109	0.000664778
1424349_a_at	lpgat1	lysophosphatidylglycerol acyltransferase 1	0.011352	0.000497497	0.00125056	0.0242635	0.00376645	0.00170752	0.00149139	0.00279709	0.01004	0	0.0109622	0.00910105	0.000721162	0.0101391	0.0178627	0.00103774
1424350_s_at	lpgat1	lysophosphatidylglycerol acyltransferase 1	0.0100731	0.000538784	0.00160501	0.0563388	0.00698126	0.00578502	0.00126897	0.00306985	0.0105737	0.00053716	0.0204515	0.0136089	0.000935468	0.0117383	0.016231	0.00108691
1424351_at	WFDC2	WAP four-disulfide core domain 2	0.018899	0.000779739	0.000342718	0.0174024	0.00923321	0.0721443	0.0114538	0.0185651	0.0634945	0.00145792	0.0232604	0.0489181	0.0020091	0.0190079	0.0204255	0.000615954
1424352_at	Cyp4a12a	cytochrome P450, family 4, subfamily a, polypeptide 12a	0.0171725	0.0131574	0.0112543	0.287493	0.0104401	0.00470176	0.000962292	0.0104207	0.0459792	4.98476e-06	0.0148764	0.0256973	0.000655933	0.204363	0.0672062	0.00416241
1424485_at	ANGPTL3	angiopoietin-like 3	0.215869	0.0193842	0.0098956	0.459751	0.158887	0.000415136	0.0013411	0.0336544	0.445943	0.000580239	0.0712278	0.48081	0.00346048	0.130873	0.21567	0.0057739
1424518_at	Apol9a	apolipoprotein L 9b; apolipoprotein L 9a	0.0100927	0.000512542	0.000818478	0.0339736	0.0816387	0.000693057	0.000979974	0.0106054	0.0111477	0.000589208	0.00693473	0.0124021	0.000869458	0.0135592	0.0148052	0.000584525
1424521_at	ZFAND2B	zinc finger, AN1 type domain 2B	0.0128917	0.000666131	0.000479213	0.0127378	0.0136885	1.40451e-05	9.16231e-05	0.00440747	0.0375239	0.00168711	0.00741329	0.126028	0.0380403	0.0283723	0.0357267	3.67285e-05
1424529_s_at	Cgref1	cell growth regulator with EF hand domain 1	0.0123881	0.00592107	0.00540882	0.0123593	0.00421309	0.0275088	0.00413094	0.00310762	0.0122246	0.000593802	0.0118906	0.0150614	0.00129902	0.0104631	0.014294	0.000719949
1424531_a_at	TCEA3	transcription elongation factor A (SII), 3	0.0131799	0.000970534	0.000451692	0.0170465	0.00916619	0.00145382	0.00105524	0.0119245	0.0255634	1.97089e-05	0.0147856	0.015414	0.000870079	0.167825	0.0276281	0.000157369
1424573_at	Tmed5	transmembrane emp24 protein transport domain containing 5; similar to Transmembrane emp24 protein transport domain containing 5	0.328466	0.0015596	0.00153925	0.0347603	0.0427919	0.0539632	0.0146504	0.00470359	0.111263	0.000836367	0.0169841	0.34732	0.0107643	0.0495233	0.802469	0.0206419
1424574_at	Tmed5	transmembrane emp24 protein transport domain containing 5; similar to Transmembrane emp24 protein transport domain containing 5	0.0679428	0.0011142	0.000117297	0.02239	0.0430408	0.00132503	0.00575593	0.00534804	0.0570816	0.000739311	0.0279182	0.126331	0.00529696	0.0398642	0.857157	0.0343663
1424576_s_at	Cyp2c44	cytochrome P450, family 2, subfamily c, polypeptide 44	0.0292015	0.000588057	0	0.0101208	0.00542191	0.00241257	0.0259624	0.00465663	0.00994484	0.000480091	0.0065747	0.0120217	0.000757495	0.0135809	0.00988286	0.000550236
1424598_at	DDX6	DEAD (Asp-Glu-Ala-Asp) box polypeptide 6	0.0113829	0.000559847	0.000488503	0.0104482	0.00364135	0	0.00110844	0.00726981	0.0252181	0.00153401	0.123656	0.012437	0	0.0106458	0.0111515	0.000502566
1424599_at	FGL1	fibrinogen-like protein 1	0.0217101	0.000889074	0.00388534	0.0245837	0.00441518	0.00360272	0.00175404	0.00314616	0.0104238	0.00055125	0.00670039	0.0104266	0.000796947	0.0106149	0.0119179	0
1424607_a_at	Gm2100	predicted gene 2100	0.0117846	0.000519924	0	0.0106324	0.0174796	0	0.00130636	0.0028417	0.0105633	0.000713685	0.0106772	0.0358196	0.015234	0.0106991	0.0111401	4.02248e-07
1424609_a_at	Gm2100	predicted gene 2100	0.0130104	0	6.52721e-06	0.0106032	0.0250823	0.000670543	0.00122347	0.00302842	0.0110393	0.000773395	0.011907	0.0441356	0.0144374	0.0122204	0.015868	0.000955899
1424626_at	2010003K11Rik	RIKEN cDNA 2010003K11 gene	0.0286962	0.000842247	0.000766129	0.0285984	0.00697383	0.646443	0.36452	0.00509466	0.0247959	0.00102849	0.0141357	0.0767684	0.00375539	0.0205102	0.0314394	1.23405e-09
1424637_s_at	Ccdc47	coiled-coil domain containing 47	0.954825	0.0153363	0.00658389	0.726455	0.553291	0.000819775	0.00570779	0.0936381	0.983799	0.00430072	0.668262	0.948064	0.00366505	0.997035	0.981082	0.0230765
1424638_at	CDKN1A	cyclin-dependent kinase inhibitor 1A (P21)	0.0502924	0.000667769	5.17154e-05	0.0123174	0.00392319	0.000918075	0.00124056	0.00349862	0.0312132	0.000766852	0.0880341	0.0147586	1.83369e-05	0.0114699	0.0218629	0.000969315
1424650_at	PDIA5	protein disulfide isomerase associated 5	0.0109907	0.00163001	0.000505515	0.0100689	0.0045453	0.000945478	0.00208119	0.00685574	0.0912436	0	0.00767442	0.0129725	0.0021258	0.0106617	0.00997396	0.000533791
1424669_at	ZFYVE21	zinc finger, FYVE domain containing 21	0.0123132	0.000521349	0.000513717	0.00933082	0.00652915	0.00117201	0.00101288	0.0028222	0.0107572	0	0.00671833	0.0111049	0.00299204	0.0311436	0.0173309	0.000893069
1424683_at	FAM134B	family with sequence similarity 134, member B	0.0346389	0.00394288	0.0424565	0.396621	0.0619977	0.000565053	0.00134385	0.00507702	0.0359026	0.000630124	0.0169038	0.0298215	0.00495895	0.0816595	0.102806	0.000457872
1424713_at	calml4	calmodulin-like 4	0.0139286	0.000534238	0.000187725	0.0154458	0.0220973	0.025447	0.00350412	0.00198631	0.0585208	0.0024005	0.0924287	0.144027	0.00107015	0.0270438	0.0349286	0.00111436
1424715_at	retsat	retinol saturase (all trans retinol 13,14 reductase)	0.00974753	0.000716658	0	0.0128222	0.00443862	0.00168456	0.000977868	0.00291227	0.0098281	0	0.00665223	0.0118502	0.00114091	0.0221137	0.0125561	0.000554442
1424716_at	retsat	retinol saturase (all trans retinol 13,14 reductase)	0.0142933	0.000531775	0.000516695	0.010211	0.0037751	0.00090932	0.000983732	0.0068521	0.0428645	0.000644315	0.00716925	0.0126412	0.000775286	0.0105227	0.0127096	0.00071443
1424737_at	Thrsp	thyroid hormone responsive SPOT14 homolog (Rattus)	0.0190165	0.00901528	0.000908767	0.0269363	0.00467588	5.08597e-05	9.01421e-06	0.00310476	0.0124747	0	0.0333883	0.0366071	0.00124581	0.0104036	0.0192929	0.000876556
1424744_at	sds	serine dehydratase	0.00939729	0	0.000534871	0.00915624	0.0106518	0.00441376	0.00893972	0.00283585	0.0124151	0	0.00669531	0.0699074	0.00346271	0.0107015	0.0165276	0.000697694
1424758_s_at	SERPINA10	serine (or cysteine) peptidase inhibitor, clade A (alpha-1 antiproteinase, antitrypsin), member 10	0.0147115	0.000890251	4.66373e-05	0.0103435	0.00411948	0.000682569	0.0010634	0.00284257	0.0129351	0.000468092	0.00729001	0.0130885	0.00196871	0.00918692	0.00960713	0.000524025
1424768_at	CALD1	caldesmon 1	0.750347	0.00181215	0.00183711	0.425521	0.603943	0.0299255	0.0027744	0.0403639	0.997758	0.00183999	0.0527913	0.955658	0.00645157	0.869392	0.979144	0.0112613
1424769_s_at	CALD1	caldesmon 1	0.59839	0.000769517	0.00153266	0.728688	0.390841	0.00109159	0.00439071	0.0840164	0.957964	0.00219364	0.165796	0.999516	0.00182893	0.518461	0.951616	0.0242578
1424778_at	REEP3	receptor accessory protein 3	0.0112775	0.00111422	0.000879546	0.024035	0.0156549	0.001269	0.000955105	0.00326262	0.0187252	0.00129048	0.122749	0.0475209	0.00812143	0.0108713	0.0159062	0
1424780_a_at	REEP3	receptor accessory protein 3	0.0176043	0.000533716	0	0.0145671	0.00587128	0.000909291	0.00112897	0.00335194	0.0111154	0.000613658	0.0108066	0.0131414	0.000901906	0.00941792	0.00986454	0.000523322
1424781_at	REEP3	receptor accessory protein 3	0.0152183	0.000920006	0.000973761	0.0596979	0.129465	0.000757042	0.00212097	0.000431224	0.0256207	0.000700442	0.0134119	0.0146942	0.00113261	0.0110794	0.0112405	0
1424782_at	DRAM2	transmembrane protein 77	0.995299	0.0102306	0.00365611	0.765663	0.45179	0.00435793	0.020326	0.103502	0.996995	0.00798149	0.848042	0.785359	0.0513952	0.991747	0.995879	0.00518591
1424826_s_at	mtss1	metastasis suppressor 1	0.131955	0.00114411	0.0171269	0.978679	0.0123707	0.00095415	0.00364916	0.010568	0.151039	0.0012051	0.0229844	0.612288	0.162825	0.130684	0.0738414	0.000951758
1424828_a_at	Fh1	fumarate hydratase 1	0.0277404	0.00117535	8.45838e-06	0.0225753	0.0057774	0.489506	0.0257382	0.00419764	0.0150682	0.000246598	0.00805326	0.0150241	0.000707339	0.0127856	0.0151218	5.68424e-05
1424853_s_at	Cyp4a10	similar to DNA-directed RNA polymerase II 7.6 kDa polypeptide (RPB10) (RPB7.6) (RPABC5); hypothetical protein LOC100044218; predicted gene 13015; polymerase (RNA) II (DNA directed) polypeptide L; cytochrome P450, family 4, subfamily a, polypeptide 31; cytochrome P450, family 4, subfamily a, polypeptide 32; predicted gene 10774; cytochrome P450, family 4, subfamily a, polypeptide 10	0.0629565	0	0.00165399	0.0202145	0.00730527	0.000649145	0.00189175	0.00294615	0.0135127	0	0.00782826	0.0128677	0.000824831	0.15898	0.0192487	0.000847117
1424898_at	SLC10A1	solute carrier family 10 (sodium/bile acid cotransporter family), member 1	0.182659	0.00560767	0.000159795	0.0240114	0.00815902	0.0234828	0.0336314	0.00610264	0.0341851	0.000746686	0.153184	0.0261497	0.00112284	0.0897522	0.0564975	0.000403546
1424924_at	SEC63	SEC63-like (S. cerevisiae)	0.710747	0.000743584	0.00136724	0.901971	0.254204	0.00214305	0.00284486	0.260658	0.996162	0.00269251	0.409099	0.817577	0.00882413	0.803527	0.899763	0.0139163
1424932_at	egfr	epidermal growth factor receptor	0.0140906	6.70221e-08	0.00048445	0.00979331	0.00453747	0.00996957	0.00593329	0.00340366	0.0125279	0.000601491	0.00645418	0.0100729	0.000760163	0.0381127	0.0275043	0.00102166
1424934_at	Ugt2b1	UDP glucuronosyltransferase 2 family, polypeptide B1	0.0471086	3.00805e-05	0.000545615	0.0110438	0.0104092	0.003009	0.019084	0.00847738	0.0387562	2.99394e-05	0.00773133	0.0236965	0.00157139	0.0125778	0.0383004	0.00188266
1424937_at	PLIN5	RIKEN cDNA 2310076L09 gene	0.0181267	0.000726877	0.00659859	0.17437	0.0200042	0	0.00384815	0.000684194	0.0210586	0.000333404	0.011926	0.501461	0.00648577	0.0177958	0.0200905	0.00123979
1424948_x_at	H2-K1	histocompatibility 2, K1, K region; similar to H-2K(d) antigen	0.0155991	0.000570072	2.00546e-05	0.01045	0.00409518	0.000840757	0.000271891	0.00383864	0.0112131	7.13934e-05	0.00751326	0.0229741	0.00285809	0.0123197	0.0111379	0.000480764
1424969_s_at	UPP2	uridine phosphorylase 2	0.0217028	0.0451245	0.00329876	0.0428924	0.00570374	3.23102e-05	0.0010698	0.00381563	0.0121756	0.000488604	0.00713897	0.0174221	0.00132069	0.0181218	0.0119583	0.000528637
1424973_at	LOC100044443	similar to cytochrome P450IIIA25	0.13633	0.000690531	0.000512958	0.0108235	0.00930436	0.000780143	0.00274448	0.00435762	0.028025	0.000747065	0.00649109	0.0173379	0.000759149	0.0176808	0.078478	0.00397223
1425020_at	UBXN2A	UBX domain protein 2A; predicted gene 6245	0.329234	0.00040114	0.00307709	0.16108	0.782336	0.00010324	0.000398541	0.015287	0.763764	0.000668059	0.0711716	0.752898	0.00725181	0.120293	0.685742	0.0233609
1425048_a_at	LOC674543	predicted gene 13121; predicted gene 3160; high-mobility group (nonhistone chromosomal) protein 1-like 1; predicted gene 6090; predicted gene 3851; predicted gene 8967; predicted gene 7782; predicted gene 4587; predicted gene 4689; predicted gene 3307; predicted gene 13932; predicted gene 15059; predicted gene 3565; predicted gene 15447; predicted gene 12587; predicted gene 9012; predicted gene 6…	0.769239	0.00500325	0.00607221	0.987264	0.0180081	0.00342842	0.00137322	0.0244788	0.579982	0.00157411	0.0565418	0.966652	0.00212494	0.351904	0.355871	0.00325954
1425051_at	ISOC1	isochorismatase domain containing 1	0.98049	0.00877267	0.00463951	0.893745	0.438268	0.00427247	0.00411739	0.107375	0.998009	0.00584556	0.392364	0.869662	0.11816	0.999979	0.995334	0.00841233
1425140_at	LACTB2	lactamase, beta 2	0.532472	0.0018225	0.000385897	0.152714	0.26913	0.000262413	0.00175907	0.00893363	0.597313	0.00039973	0.135941	0.786333	0.024747	0.185786	0.635011	0.0155902
1425141_at	LACTB2	lactamase, beta 2	0.232611	0.000346896	7.72718e-09	0.0167546	0.0163953	0.000829747	0.00341871	0.00729344	0.0563637	5.24337e-09	0.0267634	0.306307	0.0190994	0.0392614	0.230356	0.0140171
1425150_at	Acnat2	acyl-coenzyme A amino acid N-acyltransferase 2	0.0580301	0.000470728	2.72141e-05	0.0217649	0.00651584	0.000130454	0.00314882	0.0125516	0.172981	0.00111989	0.0157939	0.272159	0.489125	0.134129	0.207132	0.00965223
1425222_x_at	D630002G06Rik	RIKEN cDNA D630002G06 gene	0.0359432	0.114191	0.0330666	0.145445	0.0355515	0.0012031	0.00221626	0.00257385	0.0128173	5.49721e-10	0.0110109	0.018823	0.00114095	0.0321019	0.0155292	0.000441169
1425281_a_at	TSC22D3	TSC22 domain family, member 3	0.0292295	0.00436237	0.00247381	0.0947902	0.0131064	0.00124169	0.00223462	0.00332508	0.0152775	0.000547327	0.0209464	0.0146335	0.000769799	0.0842192	0.0171635	0.00113287
1425303_at	gck	glucokinase	0.0123519	0.00221218	0.00146455	0.0576181	0.00454429	0.00898489	0.00608553	0.00278946	0.010858	0.0006475	0.00645931	0.0164577	0.00104994	0.0104828	0.0100015	0.000502261
1425326_at	ACLY	ATP citrate lyase	0.0186336	0.00222328	0.00112289	0.0439174	0.00547162	0.00360567	0.00139423	0.00436043	0.0383874	0.0016528	0.00680001	0.0187622	9.93663e-06	0.0115786	0.0107273	1.17326e-05
1425329_a_at	cyb5r3	cytochrome b5 reductase 3	0.051956	0.0018615	0.0102308	0.456273	0.103056	0.00151166	0.000982422	0.00113318	0.261317	0.00677107	0.0207947	0.0586878	0.00190394	0.0457702	0.0237295	6.96019e-09
1425330_a_at	PPM1B	similar to serine/threonine phosphatase; protein phosphatase 1B, magnesium dependent, beta isoform	0.0878051	0.00262666	0.00899413	0.183121	0.0173256	0.000263894	0.000374672	0.00679856	0.35606	0.00522967	0.0190103	0.0269008	0.000861314	0.14767	0.0450346	0.0011307
1425496_at	ABCA3	ATP-binding cassette, sub-family A (ABC1), member 3	0.0451018	0.0117525	0.269363	0.162899	0.0472948	0.000650113	0.00111641	0.00434102	0.0362951	0.000743512	0.0124464	0.0795316	0.000569989	0.144449	0.0612828	0.000444428
1425514_at	Pik3r1	phosphatidylinositol 3-kinase, regulatory subunit, polypeptide 1 (p85 alpha)	0.724457	0.00162161	0.00252955	0.993544	0.0182167	0.00144788	0.00209012	0.0159336	0.114986	0.00158934	0.0908919	0.904543	0.0331416	0.0538346	0.0571473	0.000374442
1425519_a_at	CD74	CD74 antigen (invariant polypeptide of major histocompatibility complex, class II antigen-associated)	0.0353599	0.000100859	0.000768545	0.0264656	0.0874525	4.95806e-09	0.114222	0.00456484	0.0314359	0.00184055	0.0294598	0.83887	0.00544856	0.0398738	0.0397583	0.00147917
1425545_x_at	H2-L	histocompatibility 2, D region; histocompatibility 2, D region locus 1	0.0119339	0.000535601	0.000923028	0.0102445	0.00385177	0.00101564	0.00356794	0.00462139	0.0105575	0	0.00679804	0.0290018	0.00133339	0.0102655	0.0100622	0.000515759
1425567_a_at	ANXA5	annexin A5	0.0125374	0.000685677	0.000687296	0.0158613	0.00511692	0.0484272	0.00767439	0.00692741	0.0323409	7.98709e-07	0.0185047	0.0358323	0.00303587	0.034061	0.0326718	0.00201859
1425603_at	Tmem176a	transmembrane protein 176A	0.01196	0.00164606	0.00371104	0.115709	0.00925364	0.000841802	0.00137217	0.00281023	0.0277974	8.23289e-05	0.00953987	0.0250918	0.00240118	0.024022	0.0501038	4.374e-05
1425645_s_at	Cyp2b10	cytochrome P450, family 2, subfamily b, polypeptide 10	0.0304112	0.000800354	0.00294327	0.0765748	0.00766749	0.000548306	0.0145655	0.00320879	0.020912	0.000446288	0.0121381	0.0541878	0.0898903	0.0203097	0.0343408	0.00198116
1425646_at	BC016495	cDNA sequence BC016495	0.0106452	0.0168317	1.32663e-05	0.0140763	0.00429661	0.000685485	6.60917e-05	0.00351937	0.0175657	7.72536e-06	0.00794713	0.010993	0.000812151	0.0104203	0.0118989	0.000636
1425665_a_at	Srp54a	signal recognition particle 54b; signal recognition particle 54a; signal recognition particle 54C	0.852229	0.00208674	0.00225131	0.971119	0.262402	0.0431743	0.0127222	0.199598	0.989307	0.00345841	0.215386	0.952915	0.00702075	0.986474	0.996895	0.0035661
1425688_a_at	DPYS	dihydropyrimidinase	0.0473562	0.00177953	0.0017168	0.0213602	0.00588128	0.000960183	0.00285072	0.0049499	0.0118151	0.000499445	0.0075449	0.0113017	0.000899145	0.159711	0.0169051	0.000716679
1425718_a_at	IVNS1ABP	influenza virus NS1A binding protein	0.0791146	0.0118661	0.00241396	0.046422	0.0156747	0.00148434	1.33679e-05	0.00397589	0.0924021	9.31717e-05	0.00960692	0.129172	0.00800639	0.0199706	0.015519	5.8084e-05
1425742_a_at	Tsc22d1	TSC22 domain family, member 1	0.0119581	0.000815938	0.00115487	0.0219911	0.00444008	0	0.00143315	0.00577069	0.0115909	1.27925e-10	0.00739817	0.01146	0.000834956	0.0183691	0.0628463	0.00211428
1425745_a_at	TACC2	transforming, acidic coiled-coil containing protein 2	0.00970014	0.000933751	0.00105369	0.0104809	0.00734205	0.000659118	0	0.00282045	0.0101389	0.000496354	0.0237134	0.0110572	0.000897274	0.0103841	0.0109307	1.86547e-07
1425771_at	AKR1D1	aldo-keto reductase family 1, member D1	0.85291	0.0374615	0.0388742	0.69217	0.295638	0.00163042	0.0183338	0.0315383	0.71816	0.000706941	0.109995	0.122858	5.03087e-05	0.760884	0.753825	0.00652699
1425823_at	BC026782	similar to BC026782 protein; cDNA sequence BC026782	0.41433	0.00549258	0.00281759	0.14895	0.321732	0.0006903	0.00404346	0.0011512	0.0434337	0.000272933	0.0225496	0.23579	0.00216543	0.0754115	0.344	0.00317551
1425829_a_at	STEAP4	STEAP family member 4	0.0114529	0.00445825	0.0122119	0.0822581	0.0167277	2.14351e-06	2.40245e-06	0.00480498	0.0333394	0.00147598	0.109984	0.0295433	0.00182476	0.0133286	0.0115997	4.55756e-05
1425837_a_at	LOC100047134	similar to carbon catabolite repression 4 protein homolog; CCR4 carbon catabolite repression 4-like (S. cerevisiae)	0.0146828	0.00119731	0.00114814	0.0268617	0.00633215	0	0	0.00298372	0.0130369	0.00056343	0.00736626	0.0404012	0.00304415	0.0177031	0.0110188	0.000548372
1425853_s_at	PRLR	prolactin receptor	0.126839	0.00843135	0.0867759	0.615554	0.0460529	0.000892792	0.00144812	0.00522908	0.0656305	0.000126541	0.0122059	0.0182341	0.00081052	0.378814	0.0368766	0.00184731
1425869_a_at	psen2	presenilin 2	0.0169	0.000511974	0.000732776	0.0107269	0.00599386	0	0.00122999	0.00281577	0.0097028	0	0.00881764	0.0137732	0.00489231	0.0112961	0.00941463	0.00052402
1425956_a_at	CDADC1	cytidine and dCMP deaminase domain containing 1	0.986515	0.00201831	0.00371776	0.756398	0.447056	0.0018934	0.0208816	0.112126	0.999984	0.00318364	0.260842	0.899134	0.0168098	0.999406	0.999345	0.0027682
1425964_x_at	Hspb1	heat shock protein 1	0.0435959	0.00332209	0.0179954	0.393822	0.0403636	0.0485361	0.137039	0.00361226	0.0132729	0.000287324	0.0103295	0.0245682	1.20744e-07	0.0200369	0.100282	0.0019631
1425993_a_at	HSPH1	heat shock 105kDa/110kDa protein 1	0.321196	0.000891597	0.000367966	0.0142691	0.0059431	0.000267554	0.000961948	0.00333821	0.0217204	0.000654459	0.0115949	0.0256481	0.00116301	0.0151455	0.0143388	1.75117e-05
1426037_a_at	RGS16	regulator of G-protein signaling 16	0.0122456	0.00126799	0.000113993	0.0164116	0.00451214	0.00147235	0.00151812	0.0038302	0.0442329	0.00453007	0.0951719	0.0174545	0.00124694	0.0176921	0.0121349	0.000487325
1426083_a_at	LOC100047353	B-cell translocation gene 1, anti-proliferative; similar to myocardial vascular inhibition factor	0.0166796	0	0.000499907	0.0152625	0.0163908	4.65694e-07	0.000969416	0.00295743	0.00975252	0.00192051	0.00675009	0.0102746	0.0025743	0.0254718	0.0203355	0.000853541
1426114_at	Hnrnpab	heterogeneous nuclear ribonucleoprotein A/B	0.0243602	0.000706557	5.27358e-05	0.0142893	0.00567123	0.00139316	0.0100034	0.0503822	0.0432037	0.000260007	0.0245606	0.149111	0.00174874	0.0139579	0.0141056	1.55588e-05
1426154_s_at	Mup14	predicted gene 12809; predicted gene 2068; predicted gene 12549; predicted gene 13514; major urinary protein 2; predicted gene 13513; major urinary protein 1; predicted gene 12561; predicted gene 12546; novel member of the major urinary protein (Mup) gene family; predicted gene 2024; predicted gene 12557; predicted gene 14076; predicted gene 12552; major urinary protein LOC100048885; predicted ge…	0.0398332	0.00104164	0.00043139	0.0192768	0.0187717	0.026076	0.295282	0.00352113	0.0118698	0.000573989	0.00828117	0.0170822	0.0015691	0.0143706	0.0179676	0.000814284
1426166_at	Mup5	major urinary protein 5	0.0508758	0.000724536	0.00089851	0.0389542	0.751404	0.0132467	0.0238667	0.00879816	0.0246024	0	0.0119655	0.0589721	0.00845086	0.0219219	0.0182909	9.6828e-05
1426205_at	LOC100044953	similar to protein phosphatase 1	0.896661	0.00257625	0.00812854	0.749691	0.149941	0.00196904	0.00460605	0.02664	0.96754	0.00151228	0.116808	0.828027	0.0296628	0.566232	0.83849	0.00592809
1426215_at	ddc	dopa decarboxylase	0.0269374	0.00179868	0.00524851	0.064244	0.0119083	0.00071018	0.00169943	0.00282638	0.0113302	0	0.00778703	0.0599476	0.006315	0.0116877	0.0109955	1.14821e-10
1426223_at	TTC39C	tetratricopeptide repeat domain 39C	0.0108042	0.00206495	0.0174033	0.0923797	0.0148517	0.0285708	0.00564687	0.00297675	0.0115962	0.000481076	0.00753108	0.0126833	0	0.0406363	0.0301991	0.00249644
1426235_a_at	GLUL	predicted gene 4949; glutamate-ammonia ligase (glutamine synthetase)	0.022229	0.000442122	0.000945361	0.0162363	0.00754151	5.51983e-06	2.08376e-05	0.0124144	0.0641023	0.000278044	0.0493774	0.0299191	2.49248e-08	0.462834	0.237848	0.00961873
1426243_at	CTH	cystathionase (cystathionine gamma-lyase)	0.0219879	0.000696541	1.06746e-06	0.0191342	0.0049687	0.0324828	0.134211	0.00330006	0.0113138	0	0.0088091	0.0226674	0.00219179	0.0112369	0.0188425	0.000845232
1426246_at	proS1	protein S (alpha)	0.333053	0.00164267	0.00384868	0.351153	0.0209643	6.90761e-05	0.00178748	0.00886483	0.170578	0.000161355	0.0361544	0.967474	0.00199349	0.0977803	0.401703	0.0043433
1426269_at	VAMP7	predicted gene 14338; vesicle-associated membrane protein 7	0.869582	0.000680023	0.000796112	0.0958657	0.908081	0.00173726	0.00294777	0.163843	0.636762	0.000644526	0.529322	0.464461	0.0147678	0.567138	0.943262	0.032715
1426332_a_at	CLDN3	claudin 3	0.0144552	0.000863564	0.000717591	0.0172312	0.00522701	0.00619701	0.00466645	0.0100376	0.0146864	0.00130532	0.0115981	0.0146637	1.3397e-05	0.0820864	0.505572	0.0121496
1426351_at	Gm12141	predicted gene 12141; heat shock protein 1 (chaperonin)	1	0.0179489	0.0105719	0.969886	0.388153	0.00613078	0.0237772	1	1	0.0042312	0.999069	0.982592	0.0117226	1	0.998405	0.00789925
1426382_at	PPM1B	similar to serine/threonine phosphatase; protein phosphatase 1B, magnesium dependent, beta isoform	0.0493203	0	0.000805042	0.0139343	0.00476855	0.000633126	0.00113852	0.00286834	0.0117886	0.000829159	0.00673059	0.00986047	0.00107909	0.0125419	0.0106905	0
1426438_at	DDX3Y	DEAD (Asp-Glu-Ala-Asp) box polypeptide 3, Y-linked	0.0158214	0.000970789	0.00113891	0.0154584	0.00379954	0.000771121	0.00699872	0.002958	0.0113209	0	0.00682027	0.0119078	0.000926287	0.137842	0.0360991	0.00442956
1426440_at	DHRS7	dehydrogenase/reductase (SDR family) member 7	0.12018	0.00137735	0.00031424	0.0277298	0.00953199	0.00153344	0.00399284	0.00836774	0.0257509	0.000958287	0.0201995	0.0261705	0.00162788	0.543014	0.0682487	0.00120369
1426445_at	Ctage5	CTAGE family, member 5	0.987203	0.0458674	0.0190804	0.763694	0.707971	0.00471095	0.0123621	0.982845	0.999816	0.00169766	0.979496	0.959906	0.034176	0.998071	0.825822	0.236737
1426452_a_at	RAB30	RAB30, member RAS oncogene family	0.0377901	0.000596674	0.000544635	0.010447	0.00491006	0.000633124	0.00104474	0.0030966	0.0131003	1.1238e-07	0.00720314	0.0121103	0.000775929	0.0858434	0.0142458	0.000709157
1426457_at	SLMAP	sarcolemma associated protein	0.987332	0.00286507	0.00258231	0.901435	0.210678	0.00205227	0.00650787	0.165979	0.991637	0.0105096	0.448415	0.980319	0.0205391	0.956308	0.971468	0.0365088
1426461_at	UGP2	UDP-glucose pyrophosphorylase 2	0.0427169	0.00351152	0.0010064	0.0316887	0.0928394	0.00068786	0.00157239	0.00364459	0.023672	0.00012262	0.00764328	0.110541	0.00464338	0.0128575	0.0249209	0.00104922
1426462_at	GPHN	gephyrin	1	0.0405879	0.00553654	0.818519	0.38981	0.00407374	0.786155	0.933673	1	0.00219482	0.999982	0.967832	0.00396591	0.999927	0.813028	0.271191
1426463_at	GPHN	gephyrin	0.205348	0.00250371	0.00172456	0.0280593	0.0395513	0.000988276	0.00340158	0.00356966	0.0723007	0	0.0088878	0.0138807	0.000810894	0.0229913	0.0205604	0.000533656
1426476_at	Rasa1	RAS p21 protein activator 1	0.949006	0.00744626	0.00992943	0.83057	0.410355	0.00415361	0.00719055	0.614591	0.999559	0.00261177	0.763906	0.913199	0.0780363	0.990744	0.992079	0.0141471
1426516_a_at	lpin1	lipin 1	0.0447213	0.00158847	0.000976798	0.0261118	0.00542021	0.000394192	0.00015858	0.00377359	0.0125227	0.00053239	0.00743413	0.0119535	0.000918234	0.0127332	0.0258158	0.000894935
1426583_at	LOC100047997	activating transcription factor 2; similar to Cyclic AMP-dependent transcription factor ATF-2 (Activating transcription factor 2) (cAMP response element-binding protein CRE-BP1) (MXBP protein)	0.976184	0.00305942	0.00332533	0.985884	0.14119	0.00382438	0.00757601	0.598394	0.999969	0.0200208	0.375063	0.931511	0.051784	0.997144	0.998407	0.00458065
1426584_a_at	sorD	sorbitol dehydrogenase	0.0989121	0.00085132	2.88614e-06	0.0316741	0.00693085	0.00225517	0.00260673	0.00582043	0.0251464	0.000276241	0.028614	0.0205156	0.000435229	0.0201038	0.0207999	0.000886865
1426607_at	Gm7120	predicted gene 7120	0.0309766	0.00136668	0.00105022	0.028627	0.0100692	0.00133093	0.00194432	0.00877808	0.114645	0.00476097	0.0200196	0.0300827	0.00168746	0.0777214	0.870858	0.0120305
1426628_at	tmem184c	transmembrane protein 184C	0.716484	0.00137023	0.00105795	0.159182	0.85471	0.000574597	0.0750144	0.0173806	0.887247	0.000313195	0.279581	0.373746	0.000894289	0.801713	0.979329	0.0174424
1426645_at	HSP90AA1	predicted gene 5511; heat shock protein 90, alpha (cytosolic), class A member 1	0.713262	0.000481192	0.00929291	0.248818	0.670351	0.000365874	0.000949418	0.0120363	0.802969	0.000442845	0.0573049	0.403708	0.00243277	0.254206	0.336893	0.00214494
1426682_at	CNOT6	similar to CCR4-NOT transcription complex, subunit 6; CCR4-NOT transcription complex, subunit 6	0.993807	0.00802582	0.00852955	0.868047	0.399715	0.00317497	0.00973753	0.532196	0.999111	0.00297506	0.820291	0.997453	0.0175612	0.999041	0.988357	0.0225983
1426690_a_at	Srebf1	sterol regulatory element binding transcription factor 1	0.0202438	0.000571372	2.04858e-05	0.0188658	0.00762598	0.000818897	0.00133096	0.0168398	0.0194253	0.000745641	0.0767689	0.0235872	0.000842597	0.0119607	0.0108504	0.00055479
1426722_at	slc38a2	solute carrier family 38, member 2	0.0207373	1.10174e-05	0.00120043	0.042089	0.00658159	0.0244747	0.0151579	0.00362943	0.0113997	0.00060723	0.00669575	0.0110952	0.00083769	0.0101302	0.0131588	0
1426808_at	LGALS3	lectin, galactose binding, soluble 3	0.369735	0.000512829	0.00166192	0.0431734	0.0589215	0.00174365	0.157532	0.00609232	0.0139585	0.000458425	0.00870426	0.042785	0.00151002	0.015906	0.0169342	0.000396944
1426819_at	1426819_at	--	0.94182	0.00309659	0.00678764	0.991882	0.0403952	0.00473186	0.0138777	0.0917856	0.981637	0.00869763	0.398293	0.91863	0.0170928	0.904115	0.991946	0.00199874
1426831_at	AHCYL1	S-adenosylhomocysteine hydrolase-like 1	0.190745	0.00202898	0.0164224	0.169527	0.0524606	0.000144509	0.00322817	0.00676059	0.160211	0.00303237	0.0279711	0.035082	0.00194579	0.0223559	0.0260432	1.07317e-05
1426840_at	YTHDF3	YTH domain family 3	0.94759	0.013869	0.00269372	0.83081	0.352178	0.0036839	0.00582754	0.239248	0.999561	0.00566463	0.924983	0.778244	0.0829191	0.964749	0.987554	0.0161875
1426884_at	LOC100047670	similar to required for meiotic nuclear division 5 homolog A; required for meiotic nuclear division 5 homolog A (S. cerevisiae)	0.999699	0.00620596	0.00401682	0.78376	0.412767	0.00233129	0.0445533	0.262281	0.98265	0.00264989	0.843546	0.907996	0.00418968	0.892621	0.992107	0.00383671
1426918_at	Itgb1	integrin beta 1 (fibronectin receptor beta)	0.67575	0.00212114	0.0308515	0.571567	0.224993	0.00065304	0.00112077	0.0370944	0.809336	0.00736672	0.0336298	0.319006	0.00358755	0.415032	0.501111	0.00121487
1426959_at	BDH1	3-hydroxybutyrate dehydrogenase, type 1	0.0249304	0.000797679	0.000607767	0.0204852	0.00607383	0.000732907	0	0.00372196	0.0151115	8.15353e-05	0.00907935	0.060229	0.0063648	0.0366311	0.0166319	0.000436602
1427035_at	1427035_at	--	0.00999152	0.00436002	0.0143973	0.0664666	0.00881969	0.000742012	0.00116529	0.00286247	0.0111487	3.74558e-05	0.0138125	0.0119903	0.000989099	0.0426135	0.0151585	0.000766782
1427052_at	LOC100047358	similar to acetyl-Coenzyme A carboxylase beta	0.0208897	0.000980536	7.04701e-06	0.0143844	0.00429036	0.00233617	0.00250275	0.00296344	0.00978795	0.000599149	0.00829683	0.0245557	0.000931831	0.0127192	0.0100424	0
1427074_at	pcmtd2	protein-L-isoaspartate (D-aspartate) O-methyltransferase domain containing 2	0.555097	0.0131191	0.0237968	0.370079	0.654279	0.000530557	0.00666255	0.0877957	0.996137	0.000785529	0.224694	0.420026	0.0144729	0.952076	0.958511	0.00611875
1427097_at	Gm13416	predicted gene 13416; WW domain containing E3 ubiquitin protein ligase 1	0.867157	0.00874191	0.00632557	0.912577	0.376264	0.000230522	0.00777297	0.176536	0.999977	0.00430162	0.49113	0.960817	0.0107882	0.988946	0.995266	0.00500881
1427098_at	Gm13416	predicted gene 13416; WW domain containing E3 ubiquitin protein ligase 1	0.549141	0.01317	0.00240089	0.0862728	0.990472	0.000932168	0.00532446	0.0395316	0.956841	0.0139878	0.351291	0.662855	0.0100426	0.799036	0.820513	0.0376406
1427131_s_at	Gm15725	leucine rich repeat containing 58; predicted gene, OTTMUSG00000025724	0.721886	0.00121703	0.00191954	0.484147	0.191015	0.000878987	0.00444774	0.328625	0.991731	0.00427202	0.281188	0.549766	0.045439	0.905259	0.929808	0.063379
1427153_at	LOC100048676	branched chain ketoacid dehydrogenase E1, beta polypeptide; similar to 3-methyl-2-oxobutanoate dehydrogenase	0.0343212	0.00097666	0.000869397	0.0190106	0.0120843	0.00111521	0.00315491	0.00546024	0.021087	0.000935929	0.0122551	0.0196282	0.00146389	0.0282026	0.0234392	0.000962933
1427202_at	4833442J19Rik	RIKEN cDNA 4833442J19 gene	0.0131605	0.00999259	0.00130696	0.0556501	0.0130191	0.00933002	0.0127987	0.0043002	0.0178334	3.05863e-07	0.0119695	0.0136323	1.07143e-05	0.0256876	0.258936	0.0169078
1427229_at	HMGCR	3-hydroxy-3-methylglutaryl-Coenzyme A reductase	0.00997289	0.00245535	1.24079e-05	0.0474952	0.00460077	6.94932e-07	0.00417462	0.00292407	0.0121949	0	0.00667462	0.0306551	0.00174496	0.0133469	0.0114899	0.000510942
1427231_at	ROBO1	roundabout homolog 1 (Drosophila)	0.0540956	0.0308009	0.0237876	0.543895	0.0310381	0.00106765	0.000876655	0.00875532	0.175644	0.000786766	0.0209579	0.153721	0.00760647	0.0522116	0.199329	0.00604894
1427258_at	TRIM24	tripartite motif-containing 24	0.689146	0.00137707	0.0258652	0.97264	0.0175515	0.00109573	0.00262667	0.00883329	0.180132	0.00112196	0.0307511	0.453722	0.0456516	0.0976346	0.0848243	0.000326942
1427262_at	XIST	inactive X specific transcripts	0.0151635	0.0128261	0.00274858	0.0315982	0.0107816	0.000807648	0.00364566	0.00276054	0.0105396	0	0.00636143	0.0110346	0.000742712	0.108939	0.0150031	0.000867244
1427284_a_at	ttpa	tocopherol (alpha) transfer protein	0.996125	0.00372252	0.0158604	0.785803	0.509543	0.00621209	0.271258	0.133506	0.987987	0.00120584	0.726992	0.82816	0.00627129	0.942448	0.996196	0.0023542
1427296_at	FAM120A	family with sequence similarity 120, member A	0.965608	0.00134038	0.00183614	0.966343	0.0854028	0.00155201	0.00810747	0.411824	1	0.0068216	0.547465	0.748382	0.0375084	1	0.997238	0.00606209
1427314_at	tmed7	transmembrane emp24 protein transport domain containing 7	0.436029	0.00162185	0.00785958	0.755675	0.28884	0.00155882	0.002587	0.0375678	0.866685	0.00243312	0.0554857	0.913423	0.0285903	0.668977	0.810572	0.0261864
1427329_a_at	Igh-6	immunoglobulin heavy chain 6 (heavy chain of IgM)	0.0199398	0.016902	0.00345094	0.570277	0.0578479	0.000203013	0.00840802	0.00529425	0.017824	0	0.010945	0.141021	0.0135962	0.024409	0.0200974	0.000790043
1427345_a_at	sult1a1	sulfotransferase family 1A, phenol-preferring, member 1	0.0990009	0.00190358	0.0181398	0.916059	0.0419686	0.00116953	0.011487	0.00787241	0.0272311	6.73194e-05	0.016522	0.0789324	0.011201	0.773837	0.0918357	0.002482
1427347_s_at	Tubb2a	tubulin, beta 2A	0.0152203	0.00248226	0.00996671	0.14702	0.0114796	0.414224	0.00565361	0.00321544	0.0234641	0.00240219	0.0211552	0.0189888	5.84415e-06	0.0771988	0.018148	2.95e-06
1427351_s_at	Igh-6	immunoglobulin heavy chain 6 (heavy chain of IgM)	0.0179738	0.0117184	0.00437793	0.721138	0.0230439	0.00528839	0.00164713	0.00390733	0.0167474	0	0.011362	0.159574	0.0154172	0.0201256	0.0164788	2.61768e-07
1427370_at	amdhd1	amidohydrolase domain containing 1	0.036097	0.000900374	0.000396279	0.0127458	0.00626712	0.000922277	0.0157189	0.0037454	0.0130304	9.19507e-08	0.0171177	0.0168155	0.00520063	0.024982	0.0128034	0.000151684
1427393_at	F9	coagulation factor IX	0.408971	0.00133412	0.00659375	0.434029	0.654373	0.0120919	0.00892486	0.00963777	0.268661	0.000309323	0.0158518	0.722025	0.0051003	0.0956622	0.191045	0.00106691
1427396_a_at	Gm5064	predicted gene 5064; cold shock domain containing E1, RNA binding	0.988601	0.011676	0.00815763	0.801491	0.699886	0.00528407	0.0108474	0.614833	1	0.00210765	0.891913	0.905816	0.0151572	0.999918	0.996412	0.00846465
1427418_a_at	HIF1A	hypoxia inducible factor 1, alpha subunit	0.0966928	0.00420645	0.0015706	0.627402	0.0300492	2.84642e-05	0.00388897	0.0156111	0.656834	0.000208217	0.0334982	0.825096	0.0129661	0.0626035	0.19488	0.00589243
1427455_x_at	LOC100047628	immunoglobulin kappa chain variable 21 (V21)-1; similar to Chain L, Structural Basis Of Antigen Mimicry In A Clinically Relevant Melanoma Antigen System	0.149279	0.00126384	0.000727943	0.0146439	0.0050871	0.000719648	0.00174275	0.00303026	0.0141947	0.000474069	0.00967138	0.0786675	0.00432851	0.0491789	0.0355955	0.00136073
1427457_a_at	BMP1	bone morphogenetic protein 1	0.0250895	0.00028459	0.00306674	0.0267079	0.00486005	0.000533902	0.000903792	0.0035706	0.0293127	0.00348207	0.0200012	0.0130244	0.000689324	0.30434	0.0261634	0.00124283
1427464_s_at	HSPA5	heat shock protein 5	0.0460089	0.00123832	0.00147799	0.0178307	0.0123928	0.000698609	0.00106974	0.00314422	0.0205176	0	0.015257	0.0510758	0.00289963	0.0128596	0.011071	2.78515e-06
1427472_a_at	C8B	complement component 8, beta polypeptide	0.0161512	0.0188364	0.00336439	0.0449362	0.0116019	0.761692	0.0084439	0.00384272	0.0470415	0.00185318	0.0240604	0.0205204	0.000969976	0.0233449	0.0247278	0.000895268
1427473_at	GSTM3	glutathione S-transferase, mu 3	0.0119652	0	0.000530568	0.011693	0.00547473	0.00880804	0.00159783	0.00358312	0.0356632	0.00455862	0.0779304	0.0115402	0	0.0213051	0.015468	0.000818711
1427474_s_at	GSTM3	glutathione S-transferase, mu 3	0.0130375	2.52634e-05	0.000849549	0.011339	0.00444531	0.0177988	0.00254716	0.00430608	0.0299113	0.00185191	0.0300102	0.0119186	0.000756805	0.0644033	0.0181685	5.01144e-06
1427480_at	LEAP2	liver-expressed antimicrobial peptide 2	0.010359	0.000511008	1.92079e-05	0.00948245	0.00466737	0.00628463	0.000986887	0.00365233	0.0116124	0.000477179	0.00669778	0.0337083	0.0175506	0.0181487	0.0153794	0
1427482_a_at	LOC676792	carbonic anhydrase 8; similar to Carbonic anhydrase-related protein (CARP) (CA-VIII)	0.0870941	0.803541	0.0115263	0.0890137	0.0246892	0.0316406	0.0151808	0.00498572	0.022119	0.000586665	0.0116643	0.0214144	0.0012618	0.0693311	0.0249667	0.000679463
1427561_a_at	AFM	afamin	0.190607	0.0090964	0.0236997	0.683234	0.0430095	0.955352	0.000526859	0.0511959	0.384937	0.00364514	0.0647628	0.321927	0.00267288	0.931459	0.24744	0.000905818
1427631_x_at	MUP3	major urinary protein 3	0.0235489	1.64169e-06	0.000519751	0.0116171	0.00616261	0.000990053	0.00167113	0.00410787	0.0131252	0	0.00861485	0.109771	0.00796616	0.0117139	0.0152614	0.000816632
1427660_x_at	LOC100047628	immunoglobulin kappa chain variable 21 (V21)-1; similar to Chain L, Structural Basis Of Antigen Mimicry In A Clinically Relevant Melanoma Antigen System	0.0878832	0.00144447	0	0.0131727	0.00812389	0.000733508	0.00233433	0.00311693	0.0132611	0	0.0106445	0.0707409	0.00365458	0.0312341	0.0263526	0.000918363
1427680_a_at	NFIB	nuclear factor I/B	0.417462	0.0028656	0.000934318	0.991037	0.014221	0.0108714	0.000575792	0.309307	0.718399	0.0109555	0.288737	0.9776	0.00146502	0.20964	0.362385	0.029737
1427746_x_at	H2-K1	histocompatibility 2, K1, K region; similar to H-2K(d) antigen	0.0217239	4.91675e-05	0.000581859	0.0109006	0.00429865	9.78535e-05	0.00305947	0.00371228	0.0143951	0.000467452	0.00720442	0.0276082	9.95089e-05	0.0146643	0.0121724	1.66965e-06
1427747_a_at	Lcn2	lipocalin 2	0.0114749	0.00053985	0.000721601	0.0131853	0.00402848	0	0.000995514	0.00300559	0.00963448	0	0.00758701	0.0116042	0.0008017	0.0197701	0.00989871	0.000548931
1427797_s_at	CTSE	cathepsin E	0.117198	0.00925849	0.00199272	0.934412	0.140457	0.00559541	0.0129975	0.0386979	0.153358	1	0.0305711	0.271788	0.0162267	0.0652421	0.0655255	0.000103365
1427798_x_at	AI506816	expressed sequence AI506816	0.0691584	0.000612578	0.000418545	0.0311927	0.0189966	0.00085138	0.0065351	0.0193978	0.0596356	0.854843	0.162428	0.0259252	0.000368431	0.0274439	0.0286593	0.000648746
1427826_a_at	Slco1b2	solute carrier organic anion transporter family, member 1b2	0.620286	0.0258815	0.0274654	0.373981	0.610023	0.00197359	0.000693546	0.0134965	0.848212	0.00320062	0.0602434	0.269523	0.0105807	0.89833	0.839841	0.0168889
1427844_a_at	CEBPB	CCAAT/enhancer binding protein (C/EBP), beta	0.0144379	0.000320406	0.0151615	0.0477642	0.0042708	0	0.00177568	0.00465776	0.0120655	0.000507003	0.00723056	0.0102827	0.000798976	0.0199126	0.0107082	0.00051726
1427868_x_at	MYH1	myosin, heavy polypeptide 2, skeletal muscle, adult; myosin, heavy polypeptide 1, skeletal muscle, adult	0.0457711	0.000867605	0.000615789	0.0107988	0.00460856	0.00127614	2.79331e-05	0.00328556	0.0107211	0.000519434	0.00665809	0.0104492	0.00450297	0.0234637	0.0177772	0.000951132
1427883_a_at	COL3A1	collagen, type III, alpha 1	0.0235762	0.000476015	1.09706e-34	0.0313189	0.0660941	0.00451009	0.253821	0.00326069	0.0144619	0.000180247	0.00728825	0.0540766	0.00256994	0.0121225	0.0184594	0.000758233
1427898_at	RNF6	ring finger protein (C3H2C3 type) 6	0.516916	0.00144887	0.0141462	0.966858	0.0850299	0.00171838	0.00361553	0.551273	0.957016	0.00179721	0.677855	0.923571	0.00426337	0.672643	0.915792	0.0113404
1427912_at	Cbr3	carbonyl reductase 3	0.0135817	0.0100423	0.0259412	0.097724	0.0207394	0.0029282	0.00567782	0.00335482	0.0111863	0.00047032	0.00765685	0.00969511	9.88662e-05	0.0242724	0.0125376	0.000532437
1427932_s_at	1200016E24Rik	RIKEN cDNA 1200016E24 gene	0.0181661	0.00108627	0.00217224	0.0209301	0.00455593	0.000757061	0.00309146	0.000259528	0.0121446	0.000836444	0.00860953	0.0145848	0.00136307	0.0355545	0.0345395	9.91921e-11
1427945_at	DPYD	dihydropyrimidine dehydrogenase	0.442902	0.00219628	0.00672915	0.0437495	0.232878	0.00130031	0.00942252	0.0042051	0.0377812	2.0164e-05	0.0157843	0.0927364	0.000972743	0.0521396	0.145195	0.00165266
1427946_s_at	DPYD	dihydropyrimidine dehydrogenase	0.492146	0.00125412	0.00175627	0.0276916	0.15412	0.00170333	0.0137558	0.00411159	0.0340545	0.000398939	0.0167949	0.117009	0.00267434	0.0501474	0.171592	0.00155015
1427960_at	Ugt2b34	UDP glucuronosyltransferase 2 family, polypeptide B34	0.9731	0.00419068	0.00229447	0.783033	0.0979261	0.00320529	0.0135661	0.211225	0.994768	0.000902512	0.462599	0.901388	0.0529685	0.925143	0.880653	0.0991394
1427961_s_at	Ugt2b34	UDP glucuronosyltransferase 2 family, polypeptide B34	0.645584	0.00496481	0.000244424	0.054182	0.0327009	0.000940294	0.00343316	0.00726656	0.351024	5.2424e-05	0.067727	0.523672	0.0165212	0.0359555	0.157835	0.00674141
1427963_s_at	rdh9	retinol dehydrogenase 9	0.0117711	0.00053839	0.000517333	0.0109766	0.00404544	0.00328019	0.002601	0.00286697	0.0141019	8.68347e-05	0.0129617	0.0133231	0.000876395	0.1127	0.0442247	0.00179604
1427981_a_at	CSAD	cysteine sulfinic acid decarboxylase	0.014121	4.23798e-05	0.000485764	0.014176	0.00577638	0.000959848	0.0734059	0.00630346	0.0222438	3.03672e-06	0.00855228	0.458607	0.0128202	0.0178573	0.0195976	0.00044488
1428011_a_at	Erbb2ip	Erbb2 interacting protein	0.809255	0.00453238	0.00821441	0.827434	0.197439	0.000258491	0.00139768	0.0275387	0.95613	0.0283847	0.214621	0.902999	0.0957503	0.506298	0.943927	0.0348431
1428012_at	C8A	complement component 8, alpha polypeptide	0.010698	0.000727247	0.000500806	0.00995923	0.00407447	0.0113728	0.0021373	0.00323806	0.0103307	0	0.0074223	0.0193692	0.00160339	0.0199873	0.0254194	0.000965062
1428022_at	Lcn13	lipocalin 13	0.0106306	0.0365874	0.00982099	0.0381024	0.00372566	0.00134444	0.00105302	0.00870426	0.0133323	0.000598466	0.00637129	0.0309461	0.00354275	0.0238852	0.0160403	3.06597e-05
1428086_at	DNM1L	dynamin 1-like	0.955083	0.00490248	0.00302895	0.722137	0.524086	0.00232655	0.00625702	0.510547	0.995546	0.0327939	0.733005	0.999919	0.00429792	0.993442	0.975555	0.0308738
1428094_at	lamp2	lysosomal-associated membrane protein 2	0.999232	0.00237173	0.0024628	0.489698	0.742061	0.0219604	0.525032	0.625972	0.995565	0.011838	0.949635	0.966675	0.0187379	0.959496	0.931741	0.0871743
1428107_at	SH3BGRL	SH3-binding domain glutamic acid-rich protein like	0.802395	0.0134224	0.00536042	0.422224	0.843452	0.0021447	0.00543554	0.109964	0.993293	0.00214317	0.548758	0.993856	0.00610955	0.932527	0.954909	0.0516938
1428111_at	Slc38a4	solute carrier family 38, member 4	0.11673	0.00742344	0.00174271	0.0536905	0.0050268	1.19534e-07	0.000153676	0.00737579	0.0742553	0.000359631	0.0103201	0.350082	0.0378357	0.0170738	0.0352811	1.16631e-05
1428112_at	manf	mesencephalic astrocyte-derived neurotrophic factor	0.00992007	0.0040273	0.000381041	0.0101858	0.0040049	0.000130748	0.00135803	0.00366465	0.0119421	0.000479742	0.0098526	0.010629	0.000820357	0.0254526	0.0518681	0.00299194
1428129_at	Lman1	lectin, mannose-binding, 1	0.0816902	0.00161003	0.0124717	0.53686	0.478712	0.00116772	0.000134129	0.0260645	0.803681	0.000773445	0.0567264	0.273454	0.0239653	0.534518	0.657302	0.00219637
1428262_s_at	LOC100045099	similar to heterogeneous nuclear ribonucleoprotein A3	0.112385	0.000639394	0.00652862	0.860714	0.153986	9.16429e-05	0.00189027	0.0231408	0.285136	0.00279839	0.072807	0.998079	0.00223989	0.452714	0.604923	0.0130515
1428288_at	KLF9	Kruppel-like factor 9	0.756377	0.000986159	0.00160175	0.2717	0.793373	0.00676019	0.0481085	0.0602035	0.916192	0.00181012	0.546083	0.791365	0.0222583	0.89828	0.940357	0.0586892
1428306_at	ddit4	DNA-damage-inducible transcript 4	0.0111275	0.000524162	0	0.0110369	0.0105155	0.00171303	0.00152121	0.00303703	0.0329416	8.26626e-05	0.00853396	0.0833058	0.0163526	0.0253007	0.0179902	0.0007704
1428326_s_at	Hrsp12	heat-responsive protein 12	0.2707	0.0021582	0.00490551	0.0376666	0.153241	0.000786053	0.00109488	0.0034965	0.0390919	0.000507193	0.00907458	0.0611184	0.00122628	0.0257913	0.0382361	0.000866164
1428361_x_at	Hba-a1	hemoglobin alpha, adult chain 2; hemoglobin alpha, adult chain 1	0.0373691	3.9073e-06	0.000606684	0.0182062	0.0123722	0.00316749	0.00396208	0.00535734	0.0311407	0.00261524	0.0126258	0.0184887	0.00122276	0.0170749	0.0182633	0.000779246
1428645_at	GNAI3	guanine nucleotide binding protein (G protein), alpha inhibiting 3	0.999962	0.00564199	0.00677	0.967013	0.33633	0.00634449	0.0116614	0.967276	1	0.00487082	0.993921	0.99459	0.0152979	0.999958	0.994091	0.017263
1428669_at	Bmyc	brain expressed myelocytomatosis oncogene	0.0240482	0.00816058	0.000572655	0.015791	0.00556954	0.000658132	0.000689933	0.00473824	0.0199534	0.000291221	0.0113407	0.0244519	0.00125132	0.0476086	0.0197129	0.000753752
1428942_at	Mt2	metallothionein 2	0.0127577	0.00163472	0.010417	0.065788	0.00657769	0.0019844	0.0138257	0.00345615	0.0150173	0.000591836	0.0065163	0.0123839	0.00182349	0.0230929	0.0192199	0.000695907
1429052_at	Ptprd	protein tyrosine phosphatase, receptor type, D	0.160964	0.00280844	0.000381411	0.0288851	0.0983566	0.00116828	0.00407424	0.00418421	0.0188234	4.53742e-06	0.0181323	0.101657	0.00295873	0.0212665	0.149572	0.00869443
1429144_at	GPCPD1	preimplantation protein 4	0.0772727	0.0189332	0.0609902	0.151701	0.0157144	5.58479e-09	5.68743e-14	0.00457595	0.055556	3.88277e-05	0.0157644	0.0277146	0.00127165	0.015594	0.030416	0.000818287
1429379_at	LYVE1	lymphatic vessel endothelial hyaluronan receptor 1	0.0185943	0.00392202	0.00188847	0.044263	0.0177481	0.000630965	0.00675557	0.00439286	0.0451488	0.000405856	0.0101226	0.568194	0.0478381	0.0185474	0.0173042	0.000467275
1430307_a_at	ME1	predicted gene 7049; similar to NADP-dependent malic enzyme (NADP-ME) (Malic enzyme 1); malic enzyme 1, NADP(+)-dependent, cytosolic	0.165835	2.48766e-05	0.000760969	0.0176405	0.029791	6.35746e-05	0.00168096	0.00387446	0.0326652	0.0013385	0.00764436	0.0493786	0.00159901	0.0127983	0.013621	0.00011513
1430519_a_at	cnot7	CCR4-NOT transcription complex, subunit 7	0.200512	0.00107409	0.0011727	0.0350636	0.0140649	0.0024596	1	0.0110826	0.911579	0.00971277	0.027968	0.0303624	0.00179139	0.0473981	0.0631694	0.00316038
1430533_a_at	CTNNB1	catenin (cadherin associated protein), beta 1	0.0223048	0.000823433	0.0026136	0.0423071	0.00753296	6.74295e-05	0.00112888	0.00522881	0.210911	0.0101918	0.0747115	0.0223177	0.0011909	0.131669	0.0234159	0.000517711
1430889_a_at	tpmT	thiopurine methyltransferase	0.155384	0.00210692	0.00596842	0.438672	0.296245	0.00110349	0.00467278	0.029352	1	0.000365208	0.137376	0.0613158	0.0023539	0.741385	0.95206	0.00382861
1430980_a_at	EIF4A1	eukaryotic translation initiation factor 4A1	0.0150362	0.000231976	0.00148623	0.068197	0.0110554	0.00173583	0.00158212	0.00313613	0.0222085	0.00162128	0.0359262	0.0191793	0.00109745	0.0361435	0.0113452	0.000552347
1431028_a_at	PANK1	pantothenate kinase 1	0.0222195	0.00768618	0.00073328	0.0110667	0.00391735	0.000666429	0.00278813	0.0034181	0.0101241	0.000464857	0.0132597	0.026247	0.00087373	0.0119396	0.0110612	0.000557879
1431032_at	agl	amylo-1,6-glucosidase, 4-alpha-glucanotransferase	0.0855334	0.00366014	0.0084073	0.0582626	0.0113265	0.000744345	0.000939413	0.00399531	0.0421048	0.000687419	0.00824409	0.0186221	0.00102042	0.0963121	0.017235	7.67688e-08
1431033_x_at	agl	amylo-1,6-glucosidase, 4-alpha-glucanotransferase	0.0361621	0.00497156	0.00793173	0.0665758	0.011994	1.03009e-05	0.000990311	0.00418498	0.0532998	0.000999657	0.00794553	0.0499417	0.00172492	0.0479417	0.0127902	0
1431213_a_at	1431213_a_at	--	0.0382418	0.334223	0.340215	0.187223	0.323765	0.000432575	0.00168286	0.00845294	0.0580516	0.000833984	0.9907	0.0366497	0.000819975	0.0378228	0.0762888	0.000928049
1431214_at	1431214_at	--	0.0287847	0.866047	0.866047	0.0311026	0.0120213	0.000485131	0.00349948	0.00573465	0.0307397	0.000918032	0.0984959	0.0231089	0.00135726	0.024676	0.027613	0.000984958
1431302_a_at	NUDT7	nudix (nucleoside diphosphate linked moiety X)-type motif 7	0.0114917	0.00256664	0.00696391	0.0677328	0.0052032	0.00908338	0.0355121	0.00361621	0.0100256	0.000483543	0.00929907	0.0112605	6.81151e-06	0.0141118	0.011072	0.000529085
1431328_at	PPP1CB	protein phosphatase 1, catalytic subunit, beta isoform	0.112088	0.000427196	0.000189096	0.0367502	0.00901399	0.00168648	0.000170383	0.0169222	0.470731	0.000787584	0.121715	0.484566	0.0195722	0.415756	0.634092	0.00311422
1431645_a_at	GDI2	predicted gene 4973; guanosine diphosphate (GDP) dissociation inhibitor 2	0.202765	0.00101757	0.0121941	0.858814	0.19833	0.00205041	0.00214473	0.127448	0.858326	0.00297381	0.0540843	0.500662	0.0157796	0.796507	0.780697	0.00111644
1431808_a_at	ITIH4	inter alpha-trypsin inhibitor, heavy chain 4	0.0101402	0.000569386	0.00213137	0.0195231	0.00394531	0.00203308	0.00112965	0.00343572	0.0131182	0	0.00893084	0.0103808	0.000873758	0.0103267	0.0105247	0.000583254
1432282_a_at	Tlcd2	TLC domain containing 2	0.145427	0.00147148	0.000734805	0.0139593	0.00432125	0.000623631	0.00308493	0.00328516	0.0123745	0.000176669	0.0477237	0.0187167	0.00083199	0.0186506	0.0144287	0.000500716
1432416_a_at	LOC100046628	predicted gene 6477; predicted gene 9118; nucleophosmin 1; similar to Nucleophosmin (NPM) (Nucleolar phosphoprotein B23) (Numatrin) (Nucleolar protein NO38); predicted gene 7289; predicted gene 5611	0.224498	0.00493547	0.00233673	1	0.0392048	0.00426566	0.0710794	0.239427	0.999601	0.00476425	0.315065	0.994086	0.0126694	1	0.999566	0.00470441
1432436_a_at	ak3	adenylate kinase 3	0.0547059	0.000882928	0.0044869	0.095989	0.437963	0.000466972	0.00302252	0.00494697	0.0731532	0.000848799	0.0170208	0.0261141	3.95118e-05	0.0602508	0.0254186	3.33051e-05
1432517_a_at	nnmt	nicotinamide N-methyltransferase	0.0119327	1.22523e-05	4.80995e-07	0.0123515	0.00515519	0.0929184	0.0207357	0.00323352	0.0131376	0.000669395	0.0106595	0.161935	0.0507755	0.0105932	0.0114074	0.000599313
1433428_x_at	tgm2	transglutaminase 2, C polypeptide	0.0250895	0.00365866	0.000589309	0.0174459	0.00781458	0.00945148	0.00833863	0.00280074	0.0157216	2.35531e-06	0.00666863	0.0290692	0.000788732	0.0180034	0.014848	0.000777264
1433431_at	Pnlip	pancreatic lipase	0.0203328	0.000524536	0.000535879	0.0109865	0.00492774	0.00108059	0.00123338	0.00465423	0.0145114	0.000659058	0.0072176	0.0100887	0.00478686	0.00935377	0.0100181	0.000520424
1433442_at	KLHL9	kelch-like 9 (Drosophila)	0.636433	0.0206996	0.0101056	0.825763	0.0650686	0.00753648	0.00567169	0.0260879	0.945093	0.00140612	0.151585	0.985543	0.0132549	0.515431	0.945922	0.0181175
1433443_a_at	LOC100040592	similar to Hmgcs1 protein; 3-hydroxy-3-methylglutaryl-Coenzyme A synthase 1	0.525324	0.00201249	0.0113229	0.936274	0.0412598	0.00379742	0.00791244	0.0244313	0.875838	0.00801929	0.932603	0.988368	0.00385393	0.859596	0.94393	0.00697166
1433444_at	LOC100040592	similar to Hmgcs1 protein; 3-hydroxy-3-methylglutaryl-Coenzyme A synthase 1	0.761394	0.0105307	0.00394956	0.934971	0.0354535	0.0187812	0.0163398	0.0334148	0.920595	0.00271663	0.94206	0.992092	0.00100503	0.859407	0.973891	0.010105
1433445_x_at	LOC100040592	similar to Hmgcs1 protein; 3-hydroxy-3-methylglutaryl-Coenzyme A synthase 1	0.806326	0.00578809	0.00484051	0.961427	0.0568777	0.011244	0.0109763	0.0388059	0.982603	0.00430369	0.997297	0.95947	0.00545186	0.968523	0.993493	0.00324097
1433446_at	LOC100040592	similar to Hmgcs1 protein; 3-hydroxy-3-methylglutaryl-Coenzyme A synthase 1	0.130742	0.00576094	0.00214874	0.910748	0.0243541	0.00150318	0.00430373	0.0655661	0.43454	0.00447994	0.361604	0.970607	0.00300463	0.429184	0.531802	0.00401723
1433476_at	C78339	expressed sequence C78339	0.999428	0.00425426	0.0047271	0.982847	0.352432	0.00222028	0.0850135	0.948548	0.9947	0.0494471	0.905728	0.963095	0.0451507	0.99505	0.98719	0.0225204
1433507_a_at	Gm10182	high mobility group nucleosomal binding domain 4; predicted gene 7931; predicted gene 10282; predicted gene 3338; high mobility group nucleosomal binding domain 2; predicted gene 6594; predicted gene 6750; predicted gene 10182; predicted gene 6724; predicted gene 4248; predicted gene 9525; predicted gene 15296; similar to Hmgn2 protein; predicted gene 7125; hypothetical protein LOC638323; predict…	0.0276225	0.00120889	0.00256045	0.030352	0.01798	0.00844039	0.00992841	0.00544484	0.0244986	0.000788797	0.0131284	0.0191365	0.00126604	0.0202737	0.0205352	0.000879787
1433531_at	Acsl4	acyl-CoA synthetase long-chain family member 4	0.946021	0.00622273	0.00327988	0.986263	0.0694524	0.00686946	0.008178	0.0413536	0.995919	0.00324511	0.272735	0.997156	0.0133948	0.934769	0.986509	0.0152488
1433540_x_at	LOC100044953	similar to protein phosphatase 1	0.202104	0.00187316	0.00342139	0.170081	0.113429	0.00058952	0.000145583	0.00747832	0.28484	3.49315e-05	0.0124946	0.271348	0.0121266	0.0359232	0.176444	0.00325382
1433575_at	Sox4	SRY-box containing gene 19; SRY-box containing gene 4	0.0141887	0.000520421	0.000278386	0.0170923	0.0081993	0.000304417	0.000238629	0.0337668	0.457924	0.0018484	0.0168707	0.0262371	0.00180386	0.0303439	0.200808	0.00771368
1433581_at	1190002N15Rik	hypothetical protein LOC100044725; RIKEN cDNA 1190002N15 gene	0.0287111	0.00163271	0.00545692	0.235923	0.0535633	0.00188594	0.0012784	0.00595618	0.177675	0.00153863	0.0157324	0.617198	0.0248301	0.0204031	0.0372245	0.00174634
1433613_at	PANK3	pantothenate kinase 3	0.352528	0.0529455	0.0139249	0.653228	0.0447153	0.000299578	0.000758355	0.0111573	0.664051	0.000608252	0.0938996	0.650128	0.024604	0.409186	0.570111	0.00329313
1433631_at	LOC100047658	similar to Eukaryotic translation initiation factor 5; eukaryotic translation initiation factor 5	0.991736	0.00225807	0.0106779	0.496919	0.633843	0.00207126	0.0246895	0.74029	0.999416	0.000930446	0.868365	0.839242	0.00285352	0.999447	0.558614	0.547717
1433668_at	PNRC1	proline-rich nuclear receptor coactivator 1	0.0098172	0.00119771	0.000632755	0.0201501	0.00660047	0.000726728	0.00115844	0.00334199	0.0131915	0.00178499	0.0362074	0.0108461	0.00099828	0.0218439	0.0130065	5.70598e-07
1433691_at	Ppp1r3c	protein phosphatase 1, regulatory (inhibitor) subunit 3C	0.0137231	0.000752465	0.000996422	0.0308355	0.0147662	0.00217298	0.0064122	0.00478719	0.0214143	0.000556859	0.0207544	0.193021	0.029465	0.0171169	0.0146676	0.000870082
1433704_s_at	SEC62	SEC62 homolog (S. cerevisiae)	0.937376	0.0060777	0.014796	0.863201	0.432462	0.0036346	0.00820235	0.666541	0.997647	0.00210291	0.770251	0.994935	0.00661245	0.99442	0.983534	0.023679
1433718_a_at	CBX1	similar to heterochromatin protein 1 beta; chromobox homolog 1 (Drosophila HP1 beta)	0.130268	0.0046145	0.00778456	0.0990147	0.0184624	0.000954672	0.00181862	0.00346622	0.0463745	0.000916753	0.00998914	0.0276719	0.000596083	0.0128359	0.033382	0.000577964
1433850_at	LOC627908	similar to protein phosphatase 4, regulatory subunit 2; similar to Protein phosphatase 4, regulatory subunit 2; protein phosphatase 4, regulatory subunit 2	0.971557	0.00352086	0.00381854	0.995373	0.157704	0.00491804	0.00760717	0.869132	1	0.00442111	0.92779	0.961502	0.0405349	0.998927	0.998453	0.00605938
1433855_at	ABAT	4-aminobutyrate aminotransferase	0.38498	2.95587e-05	0.00125423	0.0324384	0.0201215	0.00816671	0.672484	0.00457442	0.0437319	0.000259685	0.0256853	0.0218266	0.00110195	0.362833	0.23994	0.00139756
1433887_at	DNAJC3	DnaJ (Hsp40) homolog, subfamily C, member 3	0.764834	0.00161905	0.00434195	0.640411	0.499129	0.00106725	0.0109483	0.04224	0.782207	0.00411484	0.108421	0.945196	0.0029384	0.557533	0.834159	0.00316786
1433928_a_at	Rpl13a	similar to 60S ribosomal protein L13a (Transplantation antigen P198) (Tum-P198 antigen); ribosomal protein L13A; similar to 60S ribosomal protein L13a; predicted gene 6533	0.0124206	0.0117981	0.00187875	0.0883638	0.0578702	0	0.00102989	0.00262981	0.0230621	3.75296e-05	0.00855537	0.12882	0.00483634	0.0107443	0.0278468	0.000684388
1433966_x_at	asnS	asparagine synthetase	0.010029	0.0043942	0.00065535	0.0107162	0.00448552	0.000763382	0	0.00390794	0.0102695	0	0.00964628	0.0292126	0.00277571	0.0103928	0.0102159	0
1434011_a_at	Ints5	integrator complex subunit 5	0.0404304	0.0112119	0.000158767	0.0463041	0.101141	0	0.00182652	0.00471084	0.0253556	0.000647356	0.00690403	0.0224142	0.00217803	0.0272501	0.0703499	0.00170564
1434036_at	mtss1	metastasis suppressor 1	0.12353	0.00661817	0.0390495	0.930255	0.0129596	0.000827135	0.00413549	0.00814151	0.0582196	0.000871491	0.0177175	0.585633	0.124196	0.0428882	0.0371411	0.000214932
1434037_s_at	KAT2B	K(lysine) acetyltransferase 2B; predicted gene 5109	0.129933	0.00123718	1.63654e-05	0.055148	0.0551355	0.000638081	0.00147042	0.00458185	0.252017	6.49027e-06	0.0262129	0.269161	0.029019	0.0281929	0.130878	0.00286062
1434150_a_at	HIGD1C	HIG1 domain family, member 1C; UbiE-YGHL1 fusion protein; methyltransferase like 7A2	0.0457427	0.00127564	0.000675566	0.0157497	0.00534639	0.00118431	0.00243239	0.00335105	0.0131674	0	0.0119201	0.0104169	0.000818452	0.0106426	0.0202693	0.0012388
1434151_at	Mettl7a1	methyltransferase like 7A1	0.0363149	0.000536226	0.000894294	0.0222311	0.00543656	0.00671771	0.00534585	0.00334247	0.0203346	0.000653049	0.0136488	0.0101839	0.000925613	0.0109619	0.0130002	0.000781747
1434272_at	CPEB2	cytoplasmic polyadenylation element binding protein 2	0.838043	0.00110369	2.46417e-06	0.0176049	0.00637979	0.000846783	0.0198195	0.00591432	0.0236936	0.000631972	0.0125768	0.045285	0.00110361	0.0199634	0.0788268	0.00280986
1434340_at	Gm6293	RIKEN cDNA 1110020P15 gene; predicted gene 6293	0.0206458	0.00368389	0.00108498	0.0285263	0.00791146	0.00205278	0.00210151	0.00987522	0.033614	0.000866428	0.0123735	0.043693	0.00423178	0.028143	0.0189216	3.44484e-05
1434372_at	AW112010	expressed sequence AW112010	0.026087	0.00097036	2.27155e-08	0.00925106	0.0056318	0.000639744	0.0010923	0.00286558	0.0122852	0.00155922	0.00744634	0.0263481	0	0.0109667	0.026549	0.000917078
1434437_x_at	rrm2	ribonucleotide reductase M2	0.0185116	0.000724664	0.000590875	0.0282535	0.00806129	0.00154752	0.000954635	0.00368281	0.0340692	0.000821184	0.0278378	0.0545547	0.00185853	0.030907	0.162964	0.00536076
1434449_at	AQP4	aquaporin 4	0.0241158	0.000700649	0.000623488	0.0287034	0.0154718	1.63506e-05	0.00302154	0.00753081	0.0587047	0.0481418	0.57222	0.103432	0.00207966	0.0392531	0.0339365	0.000762826
1434484_at	1100001G20Rik	RIKEN cDNA 1100001G20 gene	0.109846	0	0.000668957	0.0106253	0.00388613	0.00607411	0.00415454	0.00468176	0.0143576	0.000473732	0.0108799	0.0111285	0.00182926	0.0133956	0.026941	0.00112463
1434485_a_at	UGP2	UDP-glucose pyrophosphorylase 2	0.0488154	0.00372006	0.00126652	0.0418801	0.103903	7.27948e-05	1.18016e-05	0.000829281	0.0564741	0.0006971	0.00910237	0.170148	0.00804727	0.0120104	0.0159396	0.000735414
1434486_x_at	UGP2	UDP-glucose pyrophosphorylase 2	0.0356934	0.00234404	0.000734638	0.019384	0.0333291	2.26258e-05	7.5885e-06	0.00348294	0.032066	0.000499496	0.00663391	0.0882046	0.00561762	0.0102761	0.0137106	0
1434491_a_at	Gm16399	predicted gene 6265; similar to cytochrome c oxidase, subunit VIc; cytochrome c oxidase, subunit VIc	0.0400729	0.000549939	0.000827251	0.0318051	0.0042977	0.000723533	0.00100498	0.00362648	0.013469	0.000611965	0.035967	0.013976	2.88609e-06	0.0379159	0.112398	0.0107563
1434496_at	plk3	polo-like kinase 3 (Drosophila)	0.0108936	0.00339558	0.000777782	0.0144872	0.0206194	0.00144182	0.00414593	0.00326946	0.0169794	0.000469643	0.00730896	0.0135563	0.00126977	0.0202877	0.0161054	0
1434503_s_at	lamp2	lysosomal-associated membrane protein 2	0.206465	0.000993672	0.00128482	0.0658273	0.231581	0.00112329	0.00496004	0.00376465	0.0376513	0.000456804	0.0123806	0.214892	0.0114629	0.0305088	0.174637	0.00535359
1434510_at	PAPSS2	3'-phosphoadenosine 5'-phosphosulfate synthase 2	0.995029	0.322348	0.0183795	0.690717	0.0311512	0.00930969	0.13307	0.254156	0.899773	0.00118245	0.642061	0.196801	0.000247389	0.985296	0.984292	0.00309809
1434513_at	ATP13A3	ATPase type 13A3	0.8727	0.00179815	0.00529793	0.495677	0.537845	0.00439999	0.0245789	0.153148	0.982372	0.00244134	0.661718	0.862432	0.00911497	0.98788	0.960629	0.0429679
1434542_at	GPT2	glutamic pyruvate transaminase (alanine aminotransferase) 2	0.0496046	0.00109669	0.0116488	0.520742	0.0246081	0.00810907	0.998077	0.0155108	0.335924	0.000170127	0.080083	0.0776756	0.000937346	0.865435	0.87804	0.00315036
1434553_at	TMEM56	transmembrane protein 56	0.755826	0.0113929	0.0023393	0.150532	0.0980408	0.000648812	0.00152376	0.0122982	0.260734	0.0031399	0.0523715	0.728167	0.0127102	0.105662	0.609589	0.0131939
1434620_s_at	FAM13B	family with sequence similarity 13, member B	0.0768954	0.000514567	0.000603363	0.0111472	0.0041818	0.0155371	0.0386561	0.00310843	0.0106262	0.00054732	0.00711321	0.0108048	0.00145238	0.0143841	0.014055	0.000612979
1434624_x_at	rps9	ribosomal protein S9; predicted gene 5905	0.0287904	0.00771799	0.00451748	0.148801	0.00928969	0.000498442	0.00087201	0.0300693	0.0232525	0.000851657	0.0200421	0.0283928	0.00155359	0.0257609	0.0215182	0.000914168
1434719_at	A2M	alpha-2-macroglobulin	0.0184044	0.0834166	0.0819053	0.0279976	0.017319	0.00149465	0.00139736	0.00435548	0.0167587	0.00076562	0.0222862	0.0159501	0.00116881	0.015672	0.0153716	0.000803207
1434736_at	HLF	hepatic leukemia factor	0.0263303	0.0200308	0.0165732	0.822139	0.105598	0.00166708	0.00345844	0.00411407	0.0312452	0	0.0174246	0.0689777	0.00551019	0.0494838	0.0208304	0.000720769
1434872_x_at	LOC100047207	predicted gene 4468; predicted gene 12967; similar to ribosomal protein L37	0.010659	0.000721944	5.27449e-06	0.0185722	0.00409509	0.00357429	0.00485409	0.00326325	0.0132771	0.000698132	0.00717297	0.0525113	0.000862767	0.0108202	0.0112748	0.000551571
1434882_at	MTDH	metadherin	0.77842	0.00179933	0.00942442	0.621405	0.563487	0.00455654	0.00642972	0.0251071	0.998724	0.00200595	0.109741	0.933626	0.0347793	0.985569	0.98225	0.0225954
1434987_at	ALDH2	aldehyde dehydrogenase 2, mitochondrial	0.0141625	0.000155015	0.000671759	0.0188948	0.00577183	0.00563124	0.0140322	0.00827324	0.284812	0.00605671	0.234111	0.0248229	0.00152103	0.0694393	0.0186471	1.41611e-06
1434988_x_at	ALDH2	aldehyde dehydrogenase 2, mitochondrial	0.0172821	0.000419746	0.000225169	0.0187786	0.00623188	0.0334441	0.0583771	0.00634215	0.201252	0.00666536	0.581565	0.0249674	8.87397e-06	0.0256491	0.0184035	0.000771786
1435006_s_at	ABCB7	ATP-binding cassette, sub-family B (MDR/TAP), member 7	0.999827	0.0120897	0.00668883	0.795913	0.439136	0.00671266	0.012496	0.928201	0.999985	0.00410453	0.995643	0.967315	0.0368379	0.999215	0.966344	0.0579415
1435012_x_at	LOC638418	similar to elastase 3B, pancreatic; predicted gene 13011; chymotrypsin-like elastase family, member 3B	0.0336865	0	0.000488487	0.0092982	0.00424146	0.00117714	0.00135374	0.00396157	0.0189318	0.00134696	0.00673503	0.0104525	0.00354326	0.00970748	0.00968562	0.00052584
1435129_at	Gm13422	predicted gene 13422; protein tyrosine phosphatase 4a2	0.0387182	0.0030508	0.00120925	0.0286343	0.0467549	0.00271059	0.0033112	0.0122174	0.719628	0.00313697	0.0310836	0.0273534	0.0026633	0.0264256	0.0278205	0.000933682
1435137_s_at	1200016E24Rik	RIKEN cDNA 1200016E24 gene	0.0128674	0.00110161	0.00240081	0.0224889	0.00446953	0	0.00871452	0.00459014	0.0220919	0.000542453	0.0152924	0.0115816	2.69197e-08	0.0120984	0.0184766	8.672e-06
1435176_a_at	ID2	inhibitor of DNA binding 2	0.0103106	0	0	0.0129693	0.00397386	0.00414058	0.0019506	0.0101408	0.0376167	0.00939351	0.012558	0.0123943	1.18917e-05	0.0121216	0.0114757	0.000534739
1435177_a_at	ANAPC5	anaphase-promoting complex subunit 5; similar to anaphase-promoting complex subunit 5	0.0100855	0.000868523	0.00046655	0.0108588	0.00720267	0.0017771	0.000979964	0.00299261	0.0101679	0.000472848	0.00662203	0.0227507	0.00419395	0.0398864	0.0480073	0.0017236
1435290_x_at	H2-Ea	histocompatibility 2, class II antigen A, alpha; histocompatibility 2, class II antigen E alpha	0.0622806	0.000270789	0.00133813	0.0503337	0.178827	0.000150125	0.434846	0.00685654	0.0236187	0.000767956	0.0207041	0.766933	0.00655686	0.0484321	0.0286034	0.00116182
1435324_x_at	LOC674543	predicted gene 13121; predicted gene 3160; high-mobility group (nonhistone chromosomal) protein 1-like 1; predicted gene 6090; predicted gene 3851; predicted gene 8967; predicted gene 7782; predicted gene 4587; predicted gene 4689; predicted gene 3307; predicted gene 13932; predicted gene 15059; predicted gene 3565; predicted gene 15447; predicted gene 12587; predicted gene 9012; predicted gene 6…	0.996079	0.00287882	0.000928079	1	0.0488506	0.0137	0.0208737	0.814204	1	1.54881e-07	0.428114	1	0.00424433	1	0.999729	0.0018175
1435326_at	lpgat1	lysophosphatidylglycerol acyltransferase 1	0.262088	0.00220055	0.00600337	0.218623	0.747326	0.000465154	0.00251389	0.00572986	0.126005	8.76817e-05	0.0219084	0.388484	0.00208001	0.0372792	0.159018	0.000828816
1435327_at	lpgat1	lysophosphatidylglycerol acyltransferase 1	0.245295	0.000850012	0.024686	0.529162	0.312505	0.000214247	0.000875802	0.0101448	0.282021	7.25709e-05	0.0268913	0.548058	0.00365277	0.0455394	0.178792	0.00123907
1435370_a_at	CES3	carboxylesterase 3	0.0116628	1.39017e-05	0.0012738	0.020751	0.0148672	0.00128465	0.000985622	0.00294097	0.0157254	0	0.0110546	0.0105194	0.0010085	0.0114009	0.0100943	0
1435494_s_at	dsp	desmoplakin	0.0168436	0.000819747	0.000549514	0.0185459	0.00646526	0.0268307	0.00202393	0.00796888	0.748888	0.00541006	0.0277751	0.0384765	0.00233072	0.0161593	0.015866	4.51406e-06
1435518_at	LOC100048397	RAS related protein 1b; similar to GTP-binding protein (smg p21B)	0.0386059	0.00083759	0.00441088	0.0517589	0.0275125	1.62839e-05	0.000298319	0.0053849	0.244058	0.0107686	0.151099	0.0649073	0.00183332	0.0315071	0.0217316	0.000531354
1435537_at	Ptprd	protein tyrosine phosphatase, receptor type, D	0.898017	0.0128777	0.000561633	0.195153	0.977683	0.00245573	0.0178024	0.0804792	0.989808	0.0172399	0.824788	0.980407	0.00751768	0.85858	0.923438	0.0695235
1435611_x_at	LOC638418	similar to elastase 3B, pancreatic; predicted gene 13011; chymotrypsin-like elastase family, member 3B	0.0311902	0	0.000491526	0.00964979	0.00423548	0.00118317	0.00149724	0.00339293	0.0134255	0.000784301	0.00686014	0.00986523	0.00240897	0.00991225	0.00970322	0.000516039
1435634_at	PCMTD1	protein-L-isoaspartate (D-aspartate) O-methyltransferase domain containing 1	0.885297	0.00895313	0.00407229	0.446564	0.678381	0.000203082	0.000247672	0.221865	0.927426	0.00179225	0.166016	0.649642	0.131839	0.733328	0.73647	0.0479202
1435695_a_at	Ggct	gamma-glutamyl cyclotransferase	0.0438963	0.00577897	0.0265499	0.97173	0.0127081	0.0515056	0.00978383	0.0114956	0.054856	0.00253325	0.0201151	0.958209	0.0188209	0.0581618	0.0533781	0.00143043
1435734_x_at	DUS1L	dihydrouridine synthase 1-like (S. cerevisiae)	0.0222366	0.058837	0.0112384	0.46462	0.05656	0.000545448	0.00275508	0.00558608	0.141484	0.000453148	0.0219155	0.59234	0.0427089	0.0210304	0.0226109	0.000306977
1435757_a_at	Uqcrc2	ubiquinol cytochrome c reductase core protein 2	0.0113109	0.0015843	0.000946967	0.010861	0.00533575	0.00066361	0.00116668	0.0129756	0.058873	0.00124003	0.00982202	0.0111814	5.32613e-05	0.0297299	0.0141255	3.06954e-06
1435872_at	Pim1	proviral integration site 1	0.011466	0.00478034	0.001247	0.0219269	0.00378525	0.000718522	0.00250122	0.00882025	0.0143124	0.000618458	0.0105612	0.0265287	0.00494947	0.0095532	0.01247	0.000839413
1436152_a_at	Gm15190	hepatitis B virus x interacting protein; similar to hepatitis B virus X interacting protein; predicted gene 15190	0.0114882	0.0014621	0.00259509	0.10138	0.15504	0.00173359	0.00132334	0.00375494	0.0390422	3.85712e-09	0.00779144	0.0230324	0.00249817	0.0134346	0.0207984	0.000547549
1436153_a_at	zmynd11	zinc finger, MYND domain containing 11	0.985299	0.00412576	0.00592598	0.972584	0.237625	0.00368769	0.00881656	0.413817	0.999683	0.00645352	0.970329	0.990999	0.0339791	0.988255	0.990787	0.0137993
1436298_x_at	paics	phosphoribosylaminoimidazole carboxylase, phosphoribosylaminoribosylaminoimidazole, succinocarboxamide synthetase; predicted gene 8445	0.0790062	0.00322535	3.02386e-05	0.0204718	0.00616242	0.000704502	0.00161761	0.00286497	0.0114864	0.00053203	0.0146619	0.0108204	0.000805743	0.00998694	0.0109375	5.14463e-05
1436337_at	4930420K17Rik	RIKEN cDNA 4930420K17 gene	0.0128579	0.000689461	0.000705993	0.0181149	0.00422251	0.00289353	0.0028796	0.00371383	0.0133625	0.000628277	0.00815666	0.0116464	0	0.0259451	0.0260815	0.001116
1436504_x_at	Apoa4	apolipoprotein A-IV	0.0272099	0.000365813	0.000921464	0.0400784	0.0187001	0.183932	0.387611	0.00163193	0.0248567	0.00062019	0.0169518	0.0237765	0.00115869	0.0174039	0.0148956	0.000573693
1436615_a_at	OTC	ornithine transcarbamylase	0.0958853	0.00092245	0.000974822	0.017304	0.0324573	0.00160748	0.0056496	0.00326224	0.0120388	0.000711051	0.013063	0.0108382	0.000976612	0.0147067	0.0120176	0.000647834
1436643_x_at	Hamp2	hepcidin antimicrobial peptide 2	0.0294637	0.154374	0.00641473	0.245138	0.0541909	0.000470253	1.33434e-07	0.00638257	0.0199434	0.000404562	0.0124281	0.019814	0.00128721	0.648708	0.0562528	0.00140736
1436736_x_at	D0H4S114	DNA segment, human D4S114	0.0172858	0.000545391	0.00057151	0.0100123	0.00450642	0.00570393	0.00179998	0.00285502	0.0163105	0.000520287	0.00947634	0.0794291	0.00351882	0.0106609	0.0117333	0.000656918
1436737_a_at	SORBS1	sorbin and SH3 domain containing 1	0.0103636	7.70293e-05	0.000518674	0.0101667	0.00531616	0.0889369	0.00144039	0.00307884	0.010527	7.71868e-07	0.00928001	0.0210581	0.00175608	0.00997724	0.0112534	0.000551733
1436766_at	Gm11889	predicted gene 11889; LUC7-like 2 (S. cerevisiae)	0.111	0.00944982	0.0312454	0.616277	0.0148651	0.000804411	0.00135692	0.00767298	0.0265736	7.60665e-05	0.0158762	0.840002	0.00423052	0.0279363	0.058946	0.000270627
1436767_at	Gm11889	predicted gene 11889; LUC7-like 2 (S. cerevisiae)	0.197245	0.00123596	0.00345599	0.994497	0.0268913	0.00816066	0.00129308	0.101022	0.747922	0.00343266	0.0674613	0.986529	0.0197439	0.402721	0.437565	0.00530028
1436771_x_at	PGD	phosphogluconate dehydrogenase	0.0111522	8.82158e-05	0.000733899	0.0121656	0.00870452	0.0969972	0.00251693	0.00368751	0.00942696	0.000622311	0.00824144	0.0127644	0.000903139	0.0200867	0.0150787	0
1436838_x_at	cotl1	coactosin-like 1 (Dictyostelium)	0.0105879	0.000872574	0.00148587	0.0360706	0.00474326	0.00162551	0.00171603	0.00535618	0.0134059	0.000527198	0.0100381	0.0224065	0.00129976	0.00984282	0.0104962	0.00060774
1436848_x_at	IMPA1	inositol (myo)-1(or 4)-monophosphatase 1	0.154731	0.00247742	0.00291807	0.0228393	0.012623	0.000610808	0.00166599	0.00441103	0.0560086	0.000733278	0.0081577	0.206326	7.01364e-05	0.0242183	0.0570734	0.00157586
1436902_x_at	LOC100048142	predicted gene 3787; predicted gene 9844; predicted gene 8034; similar to thymosin, beta 10; thymosin, beta 10	0.12083	0.000344489	0.000481822	0.0164915	0.0135909	0.00859614	0.288591	0.0054705	0.0213399	0.000440431	0.00930699	0.285337	0.00427264	0.0139766	0.0164856	4.25575e-05
1436905_x_at	LAPTM5	lysosomal-associated protein transmembrane 5	0.0191029	0.000103095	0	0.0162872	0.0880425	0.00127083	0.00663872	0.00583188	0.0114478	0.000711501	0.00844802	0.125922	0.00173244	0.0157234	0.0101053	0.000473993
1436936_s_at	XIST	inactive X specific transcripts	0.0129818	0.0115864	0.00325223	0.0285171	0.0103223	0.000115509	0.00700059	0.00285001	0.0109447	0.000534237	0.00697458	0.0106444	0.000751168	0.129458	0.0158113	0.00103708
1436959_x_at	nelf	nasal embryonic LHRH factor	0.010593	0.00295797	0.00219292	0.0412414	0.0251151	0.00138457	0.000981478	0.0069614	0.0932473	2.41974e-05	0.0408103	0.0155804	0.00714005	0.0127079	0.0194608	3.1e-05
1436989_s_at	SLC12A6	solute carrier family 12, member 6	0.0196822	0	0.000523532	0.0148128	0.0211114	0.00081047	0.00108658	0.0361576	0.0118154	0.000544398	0.00698227	0.0112893	0.000929057	0.0108235	0.0111539	0.000573022
1436994_a_at	Hist1h1c	histone cluster 1, H1c	0.0182618	2.4524e-07	0.000479744	0.0349553	0.00639733	0.00100511	0.00622864	0.457269	0.0958072	0.00292747	0.0220457	0.0203888	0.000610167	0.0607808	0.0728827	0.000258518
1436996_x_at	Lyz1	lysozyme 1	0.0172438	0	0.000519438	0.0216764	0.0239597	0	0.000928224	0.0033775	0.0118452	0.000475814	0.0121005	0.0822301	0.0013426	0.0986453	0.0651716	0.00319369
1436997_x_at	SH3BGRL	SH3-binding domain glutamic acid-rich protein like	0.118202	0.00558906	0.00542282	0.173565	0.244739	0.00146506	0.00108281	0.00385951	0.201482	0.000424304	0.0176089	0.616349	0.00311012	0.0396708	0.271433	0.008286
1437008_x_at	TMEM109	transmembrane protein 109	0.0114943	0.00118017	0.00321175	0.0833164	0.102808	0.0011148	0.00110177	0.00469017	0.0215604	0	0.00838785	0.0176341	0.00599955	0.0115747	0.0120112	0.000699945
1437009_a_at	RNF115	similar to Rabring 7; ring finger protein 115	0.137201	0.00691938	0.00668932	0.295225	0.0266736	0.000433773	4.97851e-05	0.00421955	0.126237	0.000316523	0.011977	0.485352	0.00771932	0.0189535	0.0912987	0.000721321
1437110_at	2810474O19Rik	RIKEN cDNA 2810474O19 gene	0.0976452	0.00236431	0.00296863	0.932526	0.097685	0.00229021	0.00859363	0.0356479	0.939447	0.00432056	0.0612768	0.8786	0.135204	0.801681	0.939121	0.0103669
1437171_x_at	Gsn	gelsolin	0.0110268	0	0	0.00999374	0.00391049	0	0.00361577	0.0076805	0.0529355	0.000902059	0.00891595	0.0107858	0.000826965	0.0229005	0.0110142	3.76702e-07
1437185_s_at	LOC100048142	predicted gene 3787; predicted gene 9844; predicted gene 8034; similar to thymosin, beta 10; thymosin, beta 10	0.120228	0.002573	0.00276485	0.0851413	0.346744	0.00764661	0.216906	0.00590161	0.01571	6.43341e-08	0.0100094	0.0297635	0.00130826	0.0166445	0.0259036	0.000670607
1437211_x_at	Elovl5	ELOVL family member 5, elongation of long chain fatty acids (yeast)	0.0304065	0.00591736	0.00121154	0.0726722	0.00877149	0.0293432	0.00279142	0.00569133	0.0374903	0.000721035	0.0194836	0.879176	0.00796159	0.0315118	0.066658	0.00163264
1437218_at	fn1	fibronectin 1	0.0229965	0.000503924	0.00099681	0.0273992	0.00411418	0.00068635	0.00123746	0.00408538	0.0147636	7.32138e-05	0.00766241	0.0130706	0.00127592	0.0275166	0.106218	0.0106278
1437225_x_at	GNAI3	guanine nucleotide binding protein (G protein), alpha inhibiting 3	0.960003	0.0158026	0.00765049	0.473128	0.902976	0.00435767	0.0170874	0.0759259	1	0.00372943	0.983624	0.983169	0.0128815	0.999856	0.997364	0.00662942
1437277_x_at	tgm2	transglutaminase 2, C polypeptide	0.0229834	0.0056135	0.000642226	0.0202621	0.0101462	0.00837578	0.010969	0.00304453	0.0120266	8.19733e-07	0.00687989	0.0160393	0.000791565	0.0149008	0.0134658	0.000705616
1437280_s_at	serbp1	serpine1 mRNA binding protein 1	0.148819	0.00164359	0.0229319	0.842027	0.0466669	0.00097647	0.00155145	0.0157311	0.459943	0.00227984	0.0518299	0.93094	0.00074238	0.0934932	0.390981	0.00612909
1437308_s_at	F2R	coagulation factor II (thrombin) receptor	0.0180145	0.000567283	0.000147891	0.0216397	0.0117638	0.000797431	0.00109802	0.00767167	0.0576775	0.000124652	0.0159609	0.624225	0.0131543	0.0412753	0.103179	0.00777257
1437326_x_at	LOC638418	similar to elastase 3B, pancreatic; predicted gene 13011; chymotrypsin-like elastase family, member 3B	0.0463139	2.90334e-06	0.000517602	0.00987774	0.00395251	0.00108724	0.00117614	0.0048241	0.0177227	0.00133123	0.00675676	0.0101556	0.00238967	0.0108097	0.0102256	0.000535202
1437380_x_at	PGD	phosphogluconate dehydrogenase	0.0120671	0	0.000927729	0.0170106	0.0155361	0.129231	0.00460197	0.00327772	0.0125545	1.48302e-05	0.0107181	0.0138253	4.21943e-05	0.0240969	0.0205812	0.0010348
1437401_at	Igf1	insulin-like growth factor 1	0.761579	0.0107208	0.00658733	0.991571	0.0349044	0.00285256	0.00839369	0.880265	0.97206	0.00801978	0.706641	0.998516	0.00640803	0.479025	0.932758	0.0184778
1437455_a_at	LOC100047353	B-cell translocation gene 1, anti-proliferative; similar to myocardial vascular inhibition factor	0.0134234	0.000611942	0.000894617	0.060362	0.183263	0.000249511	4.5231e-07	0.00370086	0.0116142	2.96638e-06	0.00775469	0.0123675	0.00346453	0.0137985	0.0163524	0.000530226
1437457_a_at	mtpn	myotrophin	0.212458	0.00240191	0.0064951	0.0976538	0.0117554	0	0.000225379	0.00323482	0.136958	0.000131821	0.0105939	0.262581	0.00285983	0.0192153	0.0290451	0.000676896
1437497_a_at	HSP90AA1	predicted gene 5511; heat shock protein 90, alpha (cytosolic), class A member 1	0.0253609	0.000567882	0.000507101	0.0116784	0.00386118	0.000807532	0.00149256	0.0028515	0.0109161	0.000720529	0.00634729	0.00983274	0.00123684	0.00946546	0.0100483	0.000572814
1437526_x_at	Gm6159	predicted gene 6159; heterogeneous nuclear ribonucleoprotein R	0.0565402	0	0.000698854	0.0211962	0.0138034	0.000863751	0.00161443	0.0140785	0.155591	0.00192246	0.0221635	0.0361945	0.00113567	0.0478689	0.039409	9.04211e-05
1437533_at	XIAP	X-linked inhibitor of apoptosis	0.232138	4.11379e-05	0.00128233	0.0302876	0.0511332	0.000693783	0.00336274	0.00548385	0.242307	0.00139403	0.0149914	0.160819	0.00483237	0.0234809	0.114559	0.00297793
1437626_at	ZFP36L2	zinc finger protein 36, C3H type-like 2	0.0382031	7.29539e-05	0.000690313	0.0104256	0.00433185	0.000781097	0.00290554	0.00283145	0.0139128	2.23651e-07	0.00686428	0.00950209	4.40558e-05	0.0879325	0.0176113	0.00056714
1437688_x_at	ATP6AP2	ATPase, H+ transporting, lysosomal accessory protein 2	0.127595	0.0017929	0.00185818	0.11005	0.0831451	0.000552675	0.00116666	0.00272248	0.0770617	0.000114221	0.0108474	0.506676	0.0054972	0.0301182	0.218261	0.00438479
1437711_x_at	Gm7278	predicted gene 6742; ornithine decarboxylase, structural 1; similar to Ornithine decarboxylase (ODC); predicted gene 7993; predicted gene 15645; predicted gene 9115; predicted gene 7278	0.0222931	0.000610798	0.000587985	0.0128669	0.00635007	0.00249781	0	0.00356797	0.0106418	0	0.0134451	0.0301479	0.00321685	0.0145572	0.0133692	0
1437723_s_at	Gm6737	Der1-like domain family, member 1; predicted gene 6737	0.0140166	0.0962863	0.0127377	0.56656	0.0242564	0.00146029	0.00594919	0.00465014	0.054659	0	0.00955251	0.0288539	0.00116798	0.0197996	0.0139986	0.000669224
1437726_x_at	C1QB	complement component 1, q subcomponent, beta polypeptide	0.0144959	0.00121079	0.00229728	0.312521	0.135463	0.000788636	0.00375347	0.00500728	0.0166879	0.000264448	0.00995914	0.0141363	0	0.0238832	0.0130274	9.78296e-05
1437772_s_at	fucA1	fucosidase, alpha-L- 1, tissue	0.0127041	0.000527209	0.00106194	0.017164	0.00485443	0.00066684	0.000994241	0.00302264	0.0122657	7.4295e-05	0.0127648	0.0112425	0.000744013	0.0358846	0.0105502	0.000563612
1437773_x_at	DDX17	DEAD (Asp-Glu-Ala-Asp) box polypeptide 17	0.00909466	0	0.00076468	0.0130319	0.0142921	0.00178741	1.21186e-05	0.00345913	0.0101284	0.000625878	0.00655064	0.0147025	0.0018365	0.0145712	0.0755043	0.00194378
1437867_at	1437867_at	--	0.0141156	0.000117039	0.0008866	0.0170799	0.0207497	0.00282085	0.00231528	0.0026414	0.016013	1.15668e-08	0.0147147	0.0516424	0.00229679	0.222972	0.02775	3.03318e-07
1437874_s_at	Hexb	hexosaminidase B	0.0243238	0.00880156	0.00289611	0.0883238	0.00952844	0.0010267	0.00118619	0.0104062	0.239902	0.0229366	0.791917	0.0243513	0.00104787	0.109671	0.0293242	9.48845e-05
1437992_x_at	GJA1	gap junction protein, alpha 1	0.0165113	0.000715319	0.000528789	0.0096793	0.00440521	0.000807196	0.00116681	0.00478002	0.0105988	0.000553695	0.00711858	0.0207158	0.0013177	0.0162716	0.0231081	0.001447
1437995_x_at	37864	septin 7	0.822865	0.00104926	0.00203774	0.721505	0.359275	0.00455957	0.000924312	0.0400556	0.826195	0.00359772	0.16883	0.987271	0.00256246	0.121872	0.930491	0.0177215
1438009_at	Hist1h2ab	histone cluster 1, H2ad; histone cluster 1, H2ae; histone cluster 1, H2ag; histone cluster 1, H2ah; histone cluster 1, H2ai; similar to histone 2a; histone cluster 1, H2an; histone cluster 1, H2ao; histone cluster 1, H2ac; histone cluster 1, H2ab	0.0863865	0.00076868	0.00127355	0.0632556	0.224037	0.013917	0.123593	0.999729	0.0602555	0.00655412	0.0164785	0.0295298	0.000973521	0.0220655	0.0291096	0.000682338
1438040_a_at	Hsp90b1	heat shock protein 90, beta (Grp94), member 1	0.0948175	0.149224	0.159421	0.370253	0.663607	0.0008961	0.000270464	0.00837663	0.733789	0.0172721	0.361529	0.138999	0.000120987	0.178412	0.0558479	0.000306369
1438069_a_at	RBM5	RNA binding motif protein 5	0.0322367	0	0.000552269	0.0105872	0.0067397	0.0006421	0.00113856	0.00298412	0.00988539	0.000670016	0.0154916	0.0100591	0.000791282	0.0102152	0.0110167	0.000612065
1438091_a_at	H2AFZ	H2A histone family, member Z; predicted gene 6722; predicted gene 8203	0.0523877	0.00289373	0.0054903	0.220912	0.0126707	0.00434497	0.00128653	0.00306704	0.0287656	0.000207032	0.0240002	0.0145538	0.000893868	0.0315008	0.0507638	0.00324522
1438092_x_at	H2AFZ	H2A histone family, member Z; predicted gene 6722; predicted gene 8203	0.241572	0.000213161	0.00758575	0.351826	0.0270117	5.15905e-06	5.52039e-06	0.00427088	0.0235105	3.82946e-05	0.0185785	0.0178888	0.000490409	0.0623795	0.110374	0.00556113
1438118_x_at	VIM	vimentin	0.0406086	0.000516155	0.000672857	0.0288753	0.0332312	0.0020575	0.0370688	0.00306108	0.0105392	0.000490289	0.00686863	0.0579831	0.00203307	0.0109838	0.0106529	0
1438156_x_at	Cpt1a	carnitine palmitoyltransferase 1a, liver	0.00978961	0.000649472	0.000622971	0.0212663	0.0266793	0.00454463	0.00579882	0.00452364	0.0106229	0.000598445	0.00929241	0.0127451	0	0.0217146	0.0142927	0.000892175
1438165_x_at	vat1	vesicle amine transport protein 1 homolog (T californica)	0.0137873	8.49101e-05	0.0007642	0.0130726	0.00433736	0.00294192	0.0061404	0.0155903	0.136285	0.00403555	0.147888	0.0444713	0.00254247	0.0318029	0.0120353	0.000743343
1438169_a_at	FRMD4B	FERM domain containing 4B	0.0163782	0.00022709	0.0049486	0.0577733	0.279211	0.0139222	0.0295334	0.00370353	0.0178086	2.34779e-06	0.0284694	0.0180046	2.97556e-08	0.0113852	0.0138488	0
1438183_x_at	sorD	sorbitol dehydrogenase	0.0308215	0.000573252	0.00915231	0.0873831	0.00928347	0.00177765	0.00255833	0.00462278	0.0134043	0.000171735	0.0410327	0.0176459	0.00121759	0.0276307	0.0133386	2.24344e-07
1438211_s_at	dbp	D site albumin promoter binding protein	0.0150543	0.00109191	9.32237e-05	0.0229437	0.00440599	0.0123379	0.0106688	0.00333266	0.0232638	0.0016237	0.0194465	0.0451196	0.00314945	0.011959	0.0135744	0
1438221_at	FAM126B	family with sequence similarity 126, member B	0.327766	0.0174849	0.0222184	0.656102	0.329154	0.000407792	0.00180252	0.0175798	0.230596	0.000693219	0.0835829	0.981457	0.004496	0.142119	0.739501	0.027654
1438322_x_at	Gm6781	predicted gene 6781; farnesyl diphosphate farnesyl transferase 1	0.0103622	0.000609475	1.90999e-05	0.00991423	0.00593943	0.000831865	0.00160216	0.00307098	0.0267546	0.000653599	0.0348568	0.0154917	0.000771388	0.0239031	0.0108963	0.000565954
1438368_a_at	LOC100046320	matrin 3; similar to Matrin 3	0.932159	0.00267658	0.00553283	0.870238	0.228464	0.00127256	0.00254551	0.453005	0.982721	0.00333386	0.554559	0.976695	0.0376486	0.828434	0.893607	0.105891
1438377_x_at	Slc13a3	solute carrier family 13 (sodium-dependent dicarboxylate transporter), member 3	0.00937153	0.000629396	2.14784e-06	0.0118311	0.0075269	0	0.00100002	0.00522561	0.0218436	0.000474661	0.00640225	0.0100776	0	0.0133754	0.010042	0.000523853
1438385_s_at	GPT2	glutamic pyruvate transaminase (alanine aminotransferase) 2	0.0209331	0.00122879	0.00100807	0.0226951	0.0112977	0.0218586	1	0.0116	0.116919	0.00359681	0.017638	0.0264143	0.00195563	0.038499	0.0562143	0.0041186
1438390_s_at	PTTG1	pituitary tumor-transforming gene 1	0.094858	0.00126562	0.00857971	0.0396887	0.051865	0.000523563	0.0127832	0.00704018	0.0320863	1.9032e-05	0.0252638	0.0360112	0.00141976	0.0628713	0.547029	0.0210875
1438391_x_at	HSD17B10	hydroxysteroid (17-beta) dehydrogenase 10	0.00990942	0.000804099	1.66329e-05	0.0128213	0.019979	0.00135101	0.00199353	0.00313376	0.0231183	0.000494223	0.0105537	0.0198105	0.0237896	0.0111077	0.0250853	0.000962789
1438403_s_at	MALAT1	metastasis associated lung adenocarcinoma transcript 1 (non-coding RNA)	0.13348	0.246884	0.022861	0.727488	0.0139042	0.000388989	0.00309988	0.0127585	0.691265	0.00173245	0.0405049	0.929649	0.000827349	0.0838927	0.143185	0.00193012
1438504_x_at	TM7SF3	transmembrane 7 superfamily member 3	0.0438013	3.09816e-05	0.00100976	0.0225155	0.0121167	0.00162869	0.00419217	0.00550896	0.0379528	0.000967703	0.0162606	0.168314	0.0034225	0.022687	0.0270444	0
1438547_x_at	tor2a	torsin family 2, member A	0.0164819	0.00103359	0.000640875	0.0149706	0.0224387	0.00474144	0.00279718	0.00283495	0.0269915	8.23874e-06	0.00693346	0.0115069	0	0.0100314	0.0194358	0.000708573
1438610_a_at	cryz	crystallin, zeta	0.0174622	4.43829e-09	0.00149623	0.0789383	0.00467746	1.01796e-07	0.00149433	0.00602042	0.0438148	0.0015941	0.037588	0.0116846	0.000754985	0.00924768	0.0142537	0.000820008
1438612_a_at	clpS	colipase, pancreatic	0.045218	0.000520645	1.38946e-05	0.00960848	0.00382148	0.00128607	0.00197676	0.0075092	0.0244302	0.000949881	0.00654372	0.0104105	0.00294501	0.00951295	0.00999193	0
1438627_x_at	PGD	phosphogluconate dehydrogenase	0.0107618	0.000679783	0.000944486	0.0156505	0.0086948	0.0619448	0.00389488	0.00343515	0.0121443	5.47467e-05	0.012108	0.0163805	0.000885476	0.0220386	0.0186211	0.00114565
1438633_x_at	LASP1	LIM and SH3 protein 1	0.0168078	0.0071701	0.0135591	0.230496	0.343326	0.00188932	0.00106383	0.00428244	0.0420422	9.60982e-05	0.00954404	0.040711	0.00866682	0.0322848	0.0207667	1.84051e-08
1438634_x_at	LASP1	LIM and SH3 protein 1	0.00922185	0.00187642	0.00256616	0.0563783	0.119818	0.00482323	1.93761e-06	0.00355563	0.0141439	0.000470053	0.00700304	0.029101	0.0170563	0.0242115	0.0141815	0.000598764
1438654_x_at	MMD2	monocyte to macrophage differentiation-associated 2	0.0111127	0.00053235	0	0.0100818	0.00531389	0.00261184	0.00221942	0.00488772	0.0144077	0.000468209	0.011361	0.0717273	0.0473096	0.0100303	0.0124219	4.22236e-05
1438657_x_at	LOC100044642	similar to tyrosine phosphatase; predicted gene 8783; predicted gene 15801; predicted gene 5951; protein tyrosine phosphatase 4a1; similar to killer cell lectin-like receptor subfamily A member 2	0.0199525	0.00398077	0.0484698	0.418236	0.020372	8.94616e-11	0.00153926	0.0044857	0.0180792	0.00068987	0.00898977	0.064777	0.00492674	0.016966	0.0146958	7.5637e-10
1438659_x_at	CHCHD6	coiled-coil-helix-coiled-coil-helix domain containing 6	0.0164684	0.0153728	0.002073	0.0390955	0.00830438	0.00259327	0.00128833	0.0035759	0.0228648	0.000550009	0.00926098	0.0897435	0.00701292	0.0117173	0.0211806	2.95363e-05
1438676_at	Mpa2l	macrophage activation 2 like	0.0118612	0.00100372	0.000607592	0.0120645	0.0204906	0.00124687	0.00297026	0.00499414	0.0318484	0.0058737	0.0764777	0.0979158	2.63219e-08	0.0121619	0.0111012	0.00052888
1438711_at	PKLR	pyruvate kinase liver and red blood cell	0.010477	0.000733062	0.000522696	0.00919661	0.00381842	0.0013206	0.00127607	0.00289597	0.00987182	0.000474127	0.0188554	0.0105357	0.000760729	0.00991942	0.00997426	0.000513391
1438743_at	Cyp7a1	cytochrome P450, family 7, subfamily a, polypeptide 1	0.0830854	0.00322705	0.0017474	0.314547	0.0978477	0.00177744	0.000739347	0.00267313	0.0186888	0.000364239	0.00801832	0.0676574	0.00130485	0.0191462	0.0193126	0.000435521
1438758_at	ADI1	acireductone dioxygenase 1	0.0534226	0.000921687	0.000660038	0.0365762	0.0105715	0.0495623	0.0271212	0.00519383	0.039681	0.00149061	0.0310816	0.0357868	0.00293429	0.0238683	0.0228568	9.07141e-05
1438759_x_at	ADI1	acireductone dioxygenase 1	0.07872	9.38793e-05	4.34339e-05	0.0222466	0.00671637	0.0396313	0.0111915	0.0135892	0.0466647	0.00101763	0.0303511	0.0196326	0.00119366	0.0302922	0.0289739	0.000101416
1438825_at	Gm7308	predicted gene 7743; calmodulin 3; calmodulin 2; calmodulin 1; predicted gene 7308	0.0181454	5.08586e-05	3.42082e-05	0.0135346	0.00777643	1.95816e-05	0.00287886	0.00963589	0.0405054	0.00297585	0.0360627	0.0471916	0.00165082	0.0438129	0.0134302	5.07856e-05
1438855_x_at	TNFAIP2	tumor necrosis factor, alpha-induced protein 2	0.0128301	0.000991955	0.00121831	0.0557008	0.0666451	0.00144214	0.00264972	0.00290316	0.0110062	0.000912744	0.00675805	0.015276	0.00111919	0.0116113	0.0116795	0.000557671
1438902_a_at	HSP90AA1	predicted gene 5511; heat shock protein 90, alpha (cytosolic), class A member 1	0.327891	0.000811343	0.00794108	0.113649	0.219668	0.000502137	0.000522154	0.00366569	0.306627	0.000954675	0.0183715	0.214425	0.000993621	0.0240382	0.112698	0.000502012
1438941_x_at	ampd2	adenosine monophosphate deaminase 2 (isoform L)	0.0344635	0.011068	0.00882113	0.298224	0.685468	0.00124466	0.00214316	0.0122001	0.719781	0.0135978	0.031532	0.075187	0.00474179	0.260119	0.293101	0.00137542
1438948_x_at	tspO	translocator protein	0.0239692	0.0201041	0.00413849	0.475237	0.156259	0.00324596	0.00301947	0.00449548	0.157107	0.000399904	0.027173	0.28068	0.358612	0.0308681	0.0148611	0.000246078
1438957_x_at	Cds2	CDP-diacylglycerol synthase (phosphatidate cytidylyltransferase) 2	0.0151469	0.00062909	0.000506591	0.0117464	0.0127102	0.00128245	0.00120766	0.00309031	0.0225318	0.00053896	0.00733045	0.078463	0.0354403	0.0140972	0.0527093	0.0022811
1438980_x_at	PM20D1	peptidase M20 domain containing 1	0.177746	0.00168391	0.00127001	0.0207737	0.00666569	0.00172443	0.0159441	0.00543576	0.108831	0.00138537	0.0842062	0.0489331	0.015216	0.0603249	0.0250938	0.000850632
1439036_a_at	Atp1b1	ATPase, Na+/K+ transporting, beta 1 polypeptide	0.0170782	0.00195423	0.000756075	0.0125947	0.00459175	0.00161069	0.00139097	0.00544175	0.0302471	0.000698154	0.00786952	0.0180275	0.00100109	0.111599	0.0451106	0.000570334
1439257_x_at	RPN1	ribophorin I	0.00989291	0.00117802	8.91009e-05	0.00949693	0.00593343	0.00093015	0.00121755	0.00366912	0.00997874	0.000485174	0.00678947	0.0133319	0.000772305	0.0287136	0.0102118	0.000530825
1439260_a_at	ENPP3	ectonucleotide pyrophosphatase/phosphodiesterase 3	0.024616	0.000311019	0.0034833	0.0387424	0.0143452	0.00111682	0.00133368	0.0138686	0.0575101	1.42349e-06	0.0139712	0.0733731	0.0027486	0.0983805	0.256407	0.0123009
1439264_x_at	LASP1	LIM and SH3 protein 1	0.0240496	0.00231246	0.0101601	0.30936	0.637562	0.00341332	0.00131316	0.00524019	0.0995888	0.00081192	0.015371	0.0961382	0.0459574	0.105287	0.0394353	0.000593588
1439405_x_at	BECN1	beclin 1, autophagy related	0.0130117	0.00278667	0.00120718	0.0549145	0.0353515	0.00103349	0.0010213	0.00760661	0.351356	0.00456725	0.0319924	0.0146415	0.00181346	0.0150846	0.0121968	0.000221516
1439411_a_at	XPO7	exportin 7; similar to Ran-binding protein 16	0.0182901	0.000738054	0	0.0165348	0.0227826	0.000822996	0.00189709	0.00325824	0.0131456	0	0.00906544	0.0459102	0.0507445	0.0103682	0.0105106	0
1439426_x_at	Lyz1	lysozyme 1	0.0269043	0.000103084	0.000173856	0.0382544	0.0215369	0.000527414	0.00102033	0.00428857	0.0188548	8.72412e-06	0.0183129	0.209354	0.0014846	0.235999	0.106812	0.00532015
1439439_x_at	Gm11675	predicted gene 11675; eukaryotic translation elongation factor 1 delta (guanine nucleotide exchange protein)	0.0212896	0.0182988	0.00256024	0.0318666	0.100458	0.00016133	0.00192912	0.00323144	0.0274346	9.83954e-05	0.00697918	0.020499	0.00237642	0.028498	0.0407895	0.000412562
1439443_x_at	tkt	transketolase	0.0105897	0.000647046	0.00146489	0.0330079	0.00919814	0.0154764	0.00454426	0.00302051	0.0154406	8.34953e-05	0.0171946	0.0121702	4.71085e-07	0.0106948	0.0130973	0
1439448_x_at	tmed9	transmembrane emp24 protein transport domain containing 9	0.0116679	0.050606	0.00197529	0.0518172	0.0159184	0.000757374	0.00106855	0.00337503	0.0311369	0.000476708	0.0114247	0.0131073	4.81015e-05	0.011356	0.0108522	0.000563899
1439456_x_at	ATP6AP2	ATPase, H+ transporting, lysosomal accessory protein 2	0.0905091	0.00105695	0.00219474	0.0882565	0.0899926	0.000439185	0.000940494	0.000878213	0.0650724	0.000318778	0.00925844	0.395712	0.00525333	0.0215493	0.118394	0.00137788
1439459_x_at	ACLY	ATP citrate lyase	0.0107908	0.00124357	0.000492209	0.00977407	0.00546496	0.00398884	0.00137243	0.00318405	0.00988832	0	0.0138313	0.0125483	0.00084899	0.00949404	0.00998748	0.000548812
1439463_x_at	LOC674543	predicted gene 13121; predicted gene 3160; high-mobility group (nonhistone chromosomal) protein 1-like 1; predicted gene 6090; predicted gene 3851; predicted gene 8967; predicted gene 7782; predicted gene 4587; predicted gene 4689; predicted gene 3307; predicted gene 13932; predicted gene 15059; predicted gene 3565; predicted gene 15447; predicted gene 12587; predicted gene 9012; predicted gene 6…	0.922228	0.000749426	0.0026426	0.999987	0.0404915	0.00943586	0.00611678	0.313356	0.999997	0.00258659	0.39649	0.995233	0.0054928	0.998425	0.997625	0.00438932
1439476_at	LOC100044500	desmoglein 2; similar to Dsg2 protein	0.954478	0.00402097	0.00345399	0.999935	0.0372535	0.00192184	0.023906	0.100281	0.995327	0.0101021	0.895153	0.992949	0.00904077	0.424612	0.961225	0.0167618
1441115_at	D18Ertd232e	DNA segment, Chr 18, ERATO Doi 232, expressed	0.0158459	0.00110635	0.000913366	0.0219868	0.0045231	0	0.003591	0.00308567	0.0116847	0.00139831	0.0282404	0.0240788	0.00797479	0.0359096	0.0124857	0.000581932
1442025_a_at	ZBTB16	zinc finger and BTB domain containing 16	0.0164473	0	0.000809823	0.0116941	0.00724932	0.000714442	0.00107524	0.00297292	0.0149718	0.00051925	0.00761651	0.0159219	0.00147208	0.0119694	0.0100841	0.000935671
1442744_at	Rbm39	RNA binding motif protein 39	0.0217591	0.000568652	0.00283837	0.0964765	0.00722343	0.000789472	0	0.000148204	0.0290495	0.000680852	0.0159935	0.263487	0.00228123	0.0167273	0.0192617	0.000341375
1444952_a_at	Nucks1	nuclear casein kinase and cyclin-dependent kinase substrate 1	0.0117415	0.000877377	0.00097228	0.0103415	0.00526712	0.000969329	0.00119429	0.00342364	0.0109185	0.000663336	0.019115	0.0101138	0.000795128	0.00958439	0.00969105	0.000503397
1448021_at	1448021_at	--	0.0179191	0	0.000512824	0.0111349	0.00992814	0	0.0011081	0.00282183	0.0102323	0.00049044	0.00907601	0.0122907	1.89416e-07	0.00927157	0.00996741	0.000513526
1448104_at	Aldh6a1	aldehyde dehydrogenase family 6, subfamily A1	0.532774	0.000460327	0.000995307	0.320781	0.456396	0.000325178	0.00507939	0.00749872	0.354529	0.000891784	0.0709922	0.696801	0.00198146	0.379071	0.583135	0.00908438
1448108_at	SERINC1	serine incorporator 1	0.996971	0.00302382	0.00115063	0.818325	0.577199	0.00132203	0.00893431	0.149502	0.999377	0.0538009	0.708544	0.761023	0.300605	0.935205	0.979077	0.0303782
1448123_s_at	tgfbi	transforming growth factor, beta induced	0.0205689	1.99497e-05	2.75881e-05	0.0346311	0.0063779	0.000758362	0.0300207	0.00218303	0.0243998	0.000492771	0.0179338	0.434056	0.0564655	0.0164065	0.0169293	0.000825564
1448130_at	Gm6781	predicted gene 6781; farnesyl diphosphate farnesyl transferase 1	0.00922426	0.00132235	0.000613358	0.0208528	0.00374776	0.000840476	0.00114341	0.0031481	0.024359	0.000675157	0.0189943	0.0112582	0.000760188	0.0434838	0.0105008	0
1448143_at	ALDH2	aldehyde dehydrogenase 2, mitochondrial	0.0172063	0.000995086	9.24501e-05	0.0149441	0.00534232	0.207101	0.00795824	0.00747477	0.355599	0.00324174	0.122841	0.0163776	8.33136e-06	0.0164171	0.0176189	0.000224601
1448158_at	sdc1	syndecan 1	0.0118483	0.000547663	0	0.0114743	0.00481758	0.00102271	0.00346186	0.00294138	0.018858	0.00252901	0.0149179	0.0159413	0.00179277	0.013288	0.0128816	0.000633651
1448162_at	Vcam1	vascular cell adhesion molecule 1	0.0154371	0.00197363	0.0021087	0.0275667	0.00533888	0.000623227	0.00927283	0.00756488	0.114043	0.00146364	0.0182984	0.571473	0.0574638	0.0173859	0.039343	0.000983472
1448169_at	KRT18	keratin 18	0.232315	0.00951687	0.00103059	0.0198037	0.0103642	0.00100385	0.00270399	0.00685595	0.0170625	0.000442924	0.00850752	0.0131295	0.00074954	0.0129418	0.0333562	0.000858479
1448194_a_at	H19	H19 fetal liver mRNA	0.0475668	0.00148619	0.000901591	0.0150243	0.00459069	3.76098e-05	0.00103137	0.00597433	0.0588442	3.18911e-07	0.0142664	0.0100021	1.56213e-06	0.0506931	0.0272307	0.00122036
1448210_at	Rab1	RAB1, member RAS oncogene family	0.927353	0.00376789	0.00238679	0.993437	0.0675117	0.0121524	0.00677227	0.0612991	0.97172	0.0121054	0.370302	0.999257	0.00709105	0.920134	0.979386	0.0259535
1448236_at	rdx	radixin	0.997103	0.0129197	0.00330114	0.966602	0.143484	0.00529636	0.0957412	0.663938	0.998636	0.00314889	0.833777	0.984497	0.00430456	0.996745	0.999604	0.00262363
1448244_at	Lypla1	lysophospholipase 1	0.661548	0.000836212	0.000594418	0.018343	0.0187078	0.000445397	0.0189108	0.0198263	0.0674882	0.000415559	0.0159334	0.0537884	0.00673099	0.0303759	0.202822	0.0113293
1448261_at	CDH1	cadherin 1	0.0166511	0.0528679	0.128187	0.16931	0.00735886	0.0115194	0.00120005	0.00125153	0.0199047	0	0.0125055	0.0122902	0	0.0131561	0.0123568	0.000620073
1448281_a_at	CELA2A	elastase 2A	0.0744762	0.000517673	0.00051609	0.0105158	0.00410455	0.00199329	0.00255023	0.00793861	0.0374205	0.00256728	0.00817757	0.0115313	0.00664997	0.0103403	0.0103854	0.000542143
1448288_at	NFIB	nuclear factor I/B	0.321827	0.00108	0.000417878	0.993205	0.0317636	0.00222388	0.00266119	0.0530008	0.632989	0.0105738	0.329495	0.99863	0.00226972	0.0669347	0.107949	0.00196895
1448300_at	Mgst3	microsomal glutathione S-transferase 3	0.0188963	0.000684007	0.000703112	0.0183092	0.00630453	0.257328	0.00603449	0.00467779	0.0553578	0.00173192	0.0291087	0.0172196	0.000827236	0.0888128	0.0301077	0.00105489
1448309_at	LOC636327	adaptor-related protein complex 3, mu 1 subunit; similar to Adapter-related protein complex 3 mu 1 subunit (Mu-adaptin 3A) (AP-3 adapter complex mu3A subunit)	0.235251	0.0010692	0.0197275	0.645863	0.353214	0.000935727	0.000602672	0.0207734	0.808715	0.000378009	0.0460888	0.12161	0.00257019	0.704798	0.619293	0.00224804
1448335_s_at	CCNI	cyclin I	0.0366535	6.91769e-05	0.00102628	0.0211688	0.0241862	9.08206e-10	0	0.00569372	0.114848	0.00477243	0.0508527	0.0216901	0.00137814	0.0218162	0.0183748	1.57306e-05
1448339_at	TMEM30A	transmembrane protein 30A	0.965954	0.00336031	0.00212418	0.238564	0.945231	0.00462551	0.0504939	0.204306	0.993637	0.000611907	0.915446	0.763368	0.0118945	0.951797	0.988667	0.0092829
1448350_at	asl	argininosuccinate lyase	0.022416	0.00247372	0.0044809	0.0769191	0.010493	0.0232541	0.415516	0.014777	0.0312085	0.000616843	0.0131851	0.318125	0.630136	0.0323393	0.0313761	0.00119183
1448382_at	EHHADH	enoyl-Coenzyme A, hydratase/3-hydroxyacyl Coenzyme A dehydrogenase	0.0328844	0.000737684	0.000604336	0.00942832	0.00470137	0.00140642	0.0010305	0.0033782	0.0203882	0.000532255	0.00611414	0.0184044	0.0011857	0.0141837	0.0117769	0.000609105
1448388_a_at	1110002B05Rik	RIKEN cDNA 1110002B05 gene	0.122129	0.0010151	0.00297409	0.0791607	0.0156273	0.000765451	0.00329039	0.0202311	0.170616	0.00162198	0.0176554	0.0854212	0.00138173	0.0617587	0.874611	0.0124709
1448390_a_at	Dhrs3	dehydrogenase/reductase (SDR family) member 3	0.0149238	0.000523381	0.00115415	0.0257009	0.0154704	0	0.00154483	0.00334581	0.0113533	2.59494e-07	0.0110501	0.02606	0.0138849	0.0102674	0.0122941	0.000541232
1448392_at	LOC100046740	secreted acidic cysteine rich glycoprotein; similar to Secreted acidic cysteine rich glycoprotein	0.0180754	0.00317996	0.00163027	0.0701375	0.0100475	0.00138498	0.0033891	0.00463431	0.0251782	0.000111559	0.0131986	0.112232	0.00184914	0.0166951	0.024071	0.00084868
1448425_at	eif3a	eukaryotic translation initiation factor 3, subunit A	0.979915	0.00272956	0.00504863	0.946466	0.127808	0.00729169	0.00799211	0.5274	0.999765	0.00225188	0.217423	0.993701	0.013682	0.998559	0.989697	0.0156043
1448426_at	SARDH	sarcosine dehydrogenase	0.0608748	0.000610792	0.000835721	0.0228334	0.00840144	0.00153435	0.972153	0.0337836	0.0753202	0.000792765	0.0375293	0.194509	0.00554698	0.256663	0.0373291	0.000534735
1448502_at	slc16a7	solute carrier family 16 (monocarboxylic acid transporters), member 7	0.0182487	0.00123264	0.00170033	0.0263478	0.00874137	0.00233526	0.00180989	0.0039231	0.0332861	0.000495088	0.0065464	0.0547811	0.00135366	0.0910237	0.0148185	0.00059182
1448504_a_at	C7	predicted gene 6917; similar to chromobox homolog 3; predicted gene 5792; predicted gene 7469; predicted gene 6901; predicted gene 7721; predicted gene 5196; complement component 7; chromobox homolog 3 (Drosophila HP1 gamma)	0.935842	0.00574461	0.00278438	0.996771	0.104912	0.00980723	0.0111356	0.876155	0.999975	0.00548908	0.881633	0.998193	0.00814044	0.988554	0.997933	0.0056222
1448505_at	C1D	C1D nuclear receptor co-repressor	0.914756	0.00160578	0.00148183	0.0684306	0.0216587	0.00121335	0.00259592	0.0111523	0.18134	0.0004183	0.0785838	0.461734	0.000730155	0.164586	0.81634	0.0154704
1448506_at	SERPINA6	serine (or cysteine) peptidase inhibitor, clade A, member 6	0.0173997	0.0212119	0.00124941	0.0269164	0.00447696	0.000100436	0.00106333	0.00335295	0.0127825	0.000478592	0.00809618	0.0126428	0.00103494	0.129854	0.0160476	0.000764266
1448510_at	EFNA1	ephrin A1	0.0109036	0.00216339	0.000836805	0.0319272	0.00408581	1.09128e-09	0.0010195	0.00286065	0.0170001	0.00215143	0.0141172	0.0143955	0.00106416	0.0239003	0.0202206	0.00139039
1448525_a_at	BNIP3L	similar to NIX; predicted gene 8283; BCL2/adenovirus E1B interacting protein 3-like	0.790081	0.00201498	0.000703192	0.680667	0.485476	0.00037913	0.00559801	0.576487	0.999438	0.00719021	0.392346	0.707986	0.0311223	0.984047	0.904134	0.111492
1448545_at	SDC2	syndecan 2	0.570278	0.022005	0.00303247	0.495674	0.13415	0.000199163	0.0164976	0.0109239	0.0920178	0.000328062	0.0201175	0.861954	0.000225029	0.239039	0.0669648	0.000501637
1448550_at	lbp	lipopolysaccharide binding protein	0.0110082	0.000510522	0.00273825	0.0258901	0.0042187	0.000662301	0.00124901	0.00547382	0.0130478	0	0.00661085	0.0140378	1.75606e-05	0.0111501	0.00987477	0.00052002
1448591_at	CTSS	cathepsin S	0.0145163	0.00108832	0.000408802	0.017165	0.00522927	0.000507858	0.00525644	0.00404718	0.036695	0.000779095	0.0121306	0.513888	0.0284971	0.0196079	0.0289086	0.000679854
1448619_at	DHCR7	7-dehydrocholesterol reductase	0.0122072	0.00213601	0.00134429	0.0877172	0.0061081	0.000914424	0.0011753	0.00309597	0.0136374	0.000468901	0.0113049	0.0211024	0	0.0135758	0.0123924	0
1448626_at	CDK5RAP1	CDK5 regulatory subunit associated protein 1	0.0287222	0.00078494	0.00216139	0.109933	0.0163704	0.00216318	0.0217654	0.00723131	0.397455	0.213182	0.176306	0.0537929	0.00273452	0.0312	0.0243894	0.000415392
1448632_at	PSMB10	proteasome (prosome, macropain) subunit, beta type 10	0.0118441	0.000569764	0.000627917	0.0100437	0.0178964	0.000705291	0.00202943	0.00480472	0.0107916	0	0.00806534	0.0106836	0.000952931	0.00972011	0.0100222	0.000533919
1448647_at	MAN2A1	mannosidase 2, alpha 1	0.955069	0.00289201	0.00223543	0.866341	0.259224	0.00522754	0.037579	0.335516	0.994004	0.00989908	0.416879	0.945006	0.0278841	0.949129	0.996692	0.00385028
1448649_at	ENPEP	glutamyl aminopeptidase	0.0885403	0.00156399	0.000938258	0.0130777	0.00514252	0.000624629	0.00141761	0.00936906	0.0455341	0.00241548	0.00694165	0.0103445	7.5997e-06	0.0112915	0.0158893	0.000618871
1448666_s_at	Tob2	transducer of ERBB2, 2	0.00959657	0.000845633	0.00215431	0.0187677	0.00798413	0.00074622	0.001136	0.00890499	0.0185326	0.000604715	0.00735269	0.0122731	2.01045e-05	0.0194163	0.0108268	0.000578136
1448682_at	Gm11582	similar to cytoplasmic dynein light chain 1; predicted gene 11582; dynein light chain LC8-type 1; predicted gene 6788	0.00930876	1.09259e-08	0.00141076	0.0135232	0.00392228	0.000649334	0.00159597	0.00311146	0.00952078	0.000575551	0.00759253	0.00995014	0.000765242	0.00966485	0.00989257	0.000516497
1448700_at	G0s2	G0/G1 switch gene 2	0.00959738	0.00171746	0.0013092	0.01563	0.00403475	0.00652769	0.00263458	0.00281073	0.00959856	0	0.0118768	0.0179948	0	0.0141283	0.0114119	0.000841996
1448732_at	CTSB	cathepsin B	0.0234277	0.00384223	0.0401203	0.184607	0.0194026	1.02924e-05	0.000861014	0.00464173	0.0987991	0.00218417	0.0213006	0.0301629	0.00129817	0.113439	0.0217701	8.85614e-05
1448733_at	BMI1	Bmi1 polycomb ring finger oncogene	0.571698	0.000590941	0.000916296	0.783212	0.185641	0.0042191	0.00587728	0.0346386	0.995021	0.009699	0.444549	0.966618	0.00469505	0.65159	0.919074	0.043784
1448734_at	CP	ceruloplasmin	0.0914587	0.00273168	0.036305	0.839883	0.0217315	0.00119757	0.00213957	0.00685743	0.105792	0.0019143	0.0223593	0.867545	0.0101087	0.0244262	0.0565137	0.00163075
1448741_at	Slc3a1	solute carrier family 3, member 1	0.0103224	0.000792413	0.000541507	0.0114068	0.00667687	0.0072045	2.24419e-05	0.00304382	0.0164452	0.000468852	0.00762897	0.0401304	0.00538326	0.0131793	0.0109682	0.000542729
1448754_at	Rbp1	retinol binding protein 1, cellular	0.0249382	0.000818588	0	0.0144042	0.00623523	0.0020183	0.122383	0.0046484	0.0446645	0.00101393	0.0090672	0.382357	0.0031293	0.0143804	0.0146786	0
1448756_at	S100A9	S100 calcium binding protein A9 (calgranulin B)	0.0122657	0	0	0.012128	0.00942738	0.000753905	0.00109895	0.00443786	0.014755	0.000565993	0.00845594	0.0161625	0.000715424	0.0831291	0.113561	0.00535326
1448830_at	DUSP1	dual specificity phosphatase 1	0.0125366	0.00057474	0	0.0129502	0.00733658	0.00097797	0.00104964	0.0032595	0.0147087	1.81816e-05	0.00681114	0.0575738	0.0927572	0.0137938	0.0225461	0.000915786
1448844_at	LOC100047577	similar to cytochrome b5 outer mitochondrial membrane precursor; cytochrome b5 type B	0.0395912	0.0019894	0.00110273	0.0313676	0.00664982	0.00146574	4.30907e-05	0.0032491	0.0216941	0.00185748	0.00774598	0.0103627	0.000750588	0.037616	0.0160765	0.000843536
1448852_at	rgn	regucalcin	0.999999	0.00432207	0.0102423	0.907201	0.395409	0.0257638	0.659648	0.0779846	0.965718	0.00190305	0.920395	0.99647	0.01011	0.999415	0.997638	0.00997806
1448898_at	Ccl9	chemokine (C-C motif) ligand 9	0.0344594	0.00891922	0.020199	0.376973	0.0352672	0.000354562	0.000452503	0.00788365	0.0253472	0.00110892	0.0223715	0.0251093	0.000675485	0.151091	0.034665	0.000563241
1448943_at	NRP1	neuropilin 1	0.152539	0.00130431	0.00448483	0.146442	0.738017	0.00268759	0.00256749	0.00758147	0.0957504	0.00119743	0.0173103	0.956145	0.00734043	0.0306855	0.0383371	0.00113355
1448973_at	Sult1d1	sulfotransferase family 1D, member 1	0.381836	0.00080208	0.000789194	0.018192	0.00956138	0.0318762	0.210734	0.004861	0.0130739	0	0.0187071	0.0120199	2.61994e-11	0.0201591	0.0787275	0.0060174
1448986_x_at	CSAD	cysteine sulfinic acid decarboxylase	0.0138072	0	0.00206574	0.0215792	0.00606285	3.73444e-07	0.0563651	0.00261607	0.0140373	2.41096e-12	0.00862234	0.436278	0.0105748	0.0380285	0.0234444	0
1448990_a_at	MYO1B	myosin IB	0.33308	0.00107031	0.00948366	0.43934	0.1519	0.0140426	0.00453829	0.00641311	0.473042	0.000748445	0.0196329	0.283378	0.00103928	0.101385	0.208955	3.91061e-05
1448993_at	ATG3	autophagy-related 3 (yeast)	0.999928	0.0145134	0.00889063	0.848938	0.222388	0.00261868	0.0333403	0.530811	0.99825	0.00210304	0.995356	0.570151	0.00704021	0.995469	0.983565	0.0212609
1449009_at	Tgtp1	T-cell specific GTPase 2; T-cell specific GTPase	0.0140854	0.000240981	0.000468542	0.0259917	0.0718194	6.98805e-05	0.169466	0.00609605	0.0148939	0.00271618	0.025132	0.0283456	0.000909126	0.0165927	0.0126059	0.000497565
1449036_at	RNF128	ring finger protein 128	0.983475	0.0128061	0.00759042	0.7145	0.470186	0.00494154	0.0198673	0.723694	0.996622	0.000946141	0.948824	0.941126	0.0534602	0.986909	0.704468	0.380031
1449040_a_at	SEPHS2	selenophosphate synthetase 2	0.012476	0.000597443	0.000634623	0.0100705	0.0113031	0.000794348	0.00100019	0.0036376	0.0150651	0.000503221	0.00620715	0.0195016	0.00242879	0.018757	0.0402047	0.00170422
1449047_at	Hacl1	2-hydroxyacyl-CoA lyase 1	0.097112	3.4348e-07	0.000527522	0.011557	0.00399351	0.00104785	0.00543894	0.00330248	0.0124137	1.86588e-06	0.00660943	0.0397548	0.0392846	0.0436596	0.01508	0.000830772
1449051_at	PPARA	peroxisome proliferator activated receptor alpha	0.0110726	0.00186094	0.001684	0.0925923	0.01327	0.013992	0.00100041	0.00380122	0.010863	5.35848e-05	0.00726568	0.0492373	0.00391413	0.0105196	0.0124858	8.33553e-10
1449065_at	LOC100044830	similar to acyl-CoA thioesterase	0.0349091	1.09127e-07	0.00079611	0.0499049	0.0082915	0.000607654	0.000971348	0.00305862	0.0113445	4.78385e-07	0.017392	0.0189336	0.0016189	0.0154008	0.0108386	8.62688e-08
1449067_at	SLC2A2	solute carrier family 2 (facilitated glucose transporter), member 2	0.0120532	0.00552445	0.0012591	0.00969182	0.00433057	0	0.0011661	0.00297367	0.00981517	0.000489531	0.012931	0.0101049	0.000774074	0.0108129	0.0097486	0.000544739
1449081_at	CES3	carboxylesterase 3	0.0140783	0	5.79043e-06	0.00947944	0.00416052	0.000817413	0.00131716	0.00295038	0.0101474	0.000490976	0.00868866	0.00978317	0.000799632	0.0222241	0.0103098	0.000529148
1449118_at	DBT	dihydrolipoamide branched chain transacylase E2	0.459644	0.00294184	0.00152908	0.0258735	0.0903923	0.00972723	0.0384875	0.00296423	0.0289641	0.000283432	0.0207652	0.0985077	0.000921059	0.0168378	0.0637304	0.00109771
1449123_at	ITIH3	inter-alpha trypsin inhibitor, heavy chain 3	0.0101874	0.00101882	0.000503412	0.0110953	0.00913604	0.0116497	0.00163605	0.00314937	0.0277154	0.000626064	0.00851526	0.0147982	0.00154091	0.0227134	0.018008	0.000921914
1449133_at	Sprr1a	small proline-rich protein 1A	0.0454845	1.65688e-07	0.00546191	0.0517972	0.00908073	0.00983789	0.34878	0.0027093	0.0140417	0	0.00890656	0.0153127	0.00320687	0.016009	0.0569189	0.00157369
1449193_at	Cd5l	CD5 antigen-like	0.0147724	0.000455527	0.000452679	0.0531603	0.0421863	0.000520175	0.00392531	0.00420371	0.0159929	0	0.00919869	0.367188	0.00501454	0.0269061	0.0197689	0.000660076
1449198_a_at	st3gal5	ST3 beta-galactoside alpha-2,3-sialyltransferase 5	0.234937	0.0134251	0.157659	0.616154	0.0227873	2.37895e-05	0.00118515	0.00238556	0.0189812	0.000362897	0.0117967	0.0723093	0.00644748	0.0784572	0.0608499	0.000443855
1449254_at	SPP1	secreted phosphoprotein 1	0.0145601	0.00139586	0.00337743	0.0796256	0.00497651	0.00102842	0.00420166	0.00507411	0.0873921	1.45645e-10	0.0102738	0.207664	0.0499163	0.0149052	0.0341857	0.000935271
1449308_at	C6	complement component 6	0.00952249	0.0103885	0.0078396	0.0474008	0.00443922	0.00317607	0.00210016	0.0029756	0.0112694	0.0004916	0.00731572	0.0127185	0.00118714	0.0599589	0.032942	0.00146439
1449309_at	Cyp8b1	cytochrome P450, family 8, subfamily b, polypeptide 1	0.0116623	0.0195739	0.0422134	0.0813631	0.0130862	8.07623e-05	3.48717e-05	0.00425502	0.0125137	1.1113e-05	0.0171322	0.0117542	0.00080775	0.0127509	0.0158784	0.000691391
1449316_at	Cyp4f15	cytochrome P450, family 4, subfamily f, polypeptide 15	0.0383381	5.64389e-05	0.00054606	0.029003	0.025804	0.0319196	0.333849	0.0052367	0.0212201	0.000398692	0.0206973	0.113118	0.0150698	0.0156399	0.0138535	1.45901e-07
1449321_x_at	LOC100046187	similar to Alpha-1-antitrypsin 1-2 precursor (Serine protease inhibitor 1-2) (Alpha-1 protease inhibitor 2) (Alpha-1-antiproteinase) (AAT)	0.0186092	0.0175019	0.00579611	0.161296	0.00972223	0.0010283	0.00144936	0.0178621	0.0270989	0.000672097	0.0175805	0.0870621	0.00178781	0.019544	0.026297	0.000803686
1449322_at	LOC100044642	similar to tyrosine phosphatase; predicted gene 8783; predicted gene 15801; predicted gene 5951; protein tyrosine phosphatase 4a1; similar to killer cell lectin-like receptor subfamily A member 2	0.116363	0.000354342	0.150561	0.821043	0.0219209	0.00124252	0.00120591	0.0160731	0.593414	0.000677995	0.0706503	0.45118	0.0630973	0.304701	0.300935	0.00521249
1449325_at	FADS2	fatty acid desaturase 2	0.0131797	0.00283436	0.0015806	0.0299402	0.00538619	0.0117232	0.0122582	0.00476857	0.0559522	0.00156553	0.0109412	0.0518704	0.0025097	0.0253391	0.0118131	0
1449326_x_at	SAA2	serum amyloid A 2	0.0250744	0.000745873	0.000492944	0.0102188	0.00801154	0.000742817	0.00107513	0.00294952	0.0129028	0.000525015	0.00660154	0.00981343	0.000775737	0.0101592	0.009722	0.000536187
1449337_at	tdo2	tryptophan 2,3-dioxygenase	0.072892	0.00168769	0.000808578	0.0115718	0.0108331	0.00561147	0.0122212	0.00316557	0.0107251	0.000479495	0.00677026	0.0166065	0.00082859	0.010652	0.0231797	0.000894297
1449348_at	MPP6	membrane protein, palmitoylated 6 (MAGUK p55 subfamily member 6)	0.967351	0.0060533	0.00567806	0.900066	0.587244	0.00596555	0.00638477	0.670952	1	0.00199838	0.953583	0.993396	0.00905211	0.997731	0.996622	0.00978995
1449372_at	DNAJC3	DnaJ (Hsp40) homolog, subfamily C, member 3	0.0311333	0.000218461	0.00744918	0.101869	0.0409795	0.000566775	6.14935e-05	0.00316683	0.0539468	0.00134502	0.0841341	0.0168631	0.000782313	0.0130772	0.0127963	0.000199677
1449375_at	Ces6	predicted gene 7208; carboxylesterase 6	0.0102314	0.00334623	0.00104382	0.0156131	0.00608082	0.00117967	0.00101288	0.00297207	0.00990149	0.000701704	0.00912498	0.0132922	0.000802016	0.0138827	0.0107353	0.000526261
1449385_at	HSD17B6	hydroxysteroid (17-beta) dehydrogenase 6	0.012386	0.000754227	0.000206444	0.0223694	0.00809887	0.00134538	0.00125154	0.00263871	0.0141998	3.83313e-08	0.00757104	0.0156752	0.000256551	0.273583	0.0441237	0.00308842
1449394_at	Slco1b2	solute carrier organic anion transporter family, member 1b2	0.995798	0.026997	0.0030726	0.553898	0.653793	0.0182207	0.0667361	0.853225	0.996201	0.00192534	0.963308	0.970358	0.0270481	0.991656	0.879275	0.149278
1449401_at	C1QC	complement component 1, q subcomponent, C chain	0.015679	0	0.000102764	0.0275613	0.0244948	0.000149833	0.00361161	0.0046129	0.0123623	3.87889e-05	0.00726112	0.167889	0.00366405	0.0171476	0.0170408	0.000892744
1449410_a_at	GAS5	growth arrest specific 5	0.0300455	0.00168344	0.00208503	0.343094	0.0263836	0.00273423	0.00404356	0.00691509	0.0339977	0.000937822	0.01576	0.962842	0.00279829	0.0446791	0.0798609	0.0013698
1449434_at	CAR3	carbonic anhydrase 3	0.0303594	0.00831877	0.000649032	0.0189458	0.0051295	0.00110787	0.00115362	0.00587807	0.0895289	0.000763503	0.00986199	0.224821	0.0107203	0.0123598	0.0162975	0.00069282
1449442_at	PEX11A	peroxisomal biogenesis factor 11 alpha	0.0292614	9.84035e-05	0.000518689	0.0123757	0.00403359	0.00115532	0.00193647	0.00307028	0.0100879	0.000505607	0.008698	0.0195539	0.00133196	0.00986537	0.0119302	0
1449479_at	Cyp2b13	cytochrome P450, family 2, subfamily b, polypeptide 13	0.016471	0.0108929	0.00185942	0.0317342	0.00873331	0.000173825	0.000827847	0.00912632	0.0340536	0.00156383	0.0107354	0.0163967	0.00162805	0.0420997	0.0249445	0.000688635
1449486_at	CES1	carboxylesterase 1	0.0198564	0.00512734	0.000608639	0.0450867	0.00804912	0.00252568	0.998428	0.0233086	0.0346074	0.00105357	0.0217355	0.106437	0.00250073	0.185132	0.0490501	0.00175396
1449492_a_at	Lect2	leukocyte cell-derived chemotaxin 2	0.025277	0.00535983	0.00490821	0.0501921	0.0056082	0.000605416	0.00105924	0.00605102	0.0172108	0.000888911	0.0201289	0.0376796	0.00234539	0.121582	0.0169854	0.0012945
1449525_at	fmo3	flavin containing monooxygenase 3	0.012295	0.00253001	0.00367493	0.0341417	0.0257561	0.0128708	0.00769977	0.00480869	0.0796918	2.40488e-08	0.0148099	0.0240252	0.00138777	0.0295334	0.0162274	1.37876e-05
1449556_at	LOC677644	histocompatibility 2, T region locus 23; similar to RT1 class Ib, locus H2-Q-like, grc region	0.0168536	0.000346352	2.09128e-05	0.0491162	0.257188	0.000355266	0.000885234	0.0052212	0.0448708	0.000298353	0.0108756	0.0185034	0.000892841	0.0154908	0.0168837	0.000280369
1449574_a_at	Cdc42	cell division cycle 42 homolog (S. cerevisiae); predicted gene 7407	0.0410837	0.00336309	0.0138375	0.496101	0.0702766	0.0120337	0.00211182	0.00842229	0.823706	0.00601248	0.0545302	0.380829	0.0540614	0.162187	0.164166	0.00107989
1449575_a_at	LOC100046536	glutathione S-transferase, pi 2; glutathione S-transferase, pi 1; similar to glutathione S-transferase pi class A; predicted gene 3934	0.0164497	0.0365832	0.0423635	0.157237	0.0113066	0.000565899	0.000391154	0.00354721	0.0158687	0.000497985	0.0204348	0.0136237	0.00127487	0.204229	0.0343722	0.00247578
1449585_at	il1rap	interleukin 1 receptor accessory protein	0.0633727	0.00125915	0.00149708	0.0333528	0.153062	0.0026472	0.00541347	0.00336155	0.0142203	0.000448881	0.00904621	0.0571321	0.00698588	0.0171425	0.0563394	0.00249982
1449641_at	adk	adenosine kinase	0.0291656	0	1.37207e-05	0.0375841	0.00734937	0.000879454	0.00223163	0.0378438	0.0271618	0.000740809	0.0110627	0.016484	0.00137856	0.358696	0.0429812	0.00311826
1449686_s_at	SCP2	sterol carrier protein 2, liver	0.112401	0.00132352	0.000796657	0.0177885	0.021242	0.00076834	0.00111356	0.00443832	0.0465994	0	0.00787155	0.0962035	0.00400977	0.0150382	0.0401328	0.00154643
1449732_at	ZSCAN21	zinc finger and SCAN domain containing 21	0.0133439	0.00169324	0.00166892	0.0450599	0.135952	0.000800809	0.00143236	0.00290656	0.119606	0.00109469	0.0337053	0.0408984	0.00846049	0.0119761	0.0118117	0.000629647
1449740_s_at	LOC100044500	desmoglein 2; similar to Dsg2 protein	0.951412	0.00983142	0.00382323	0.999681	0.0453382	0.00377942	0.013267	0.700747	0.99984	0.005661	0.990039	0.999895	0.00586719	0.911802	0.985482	0.0214241
1449817_at	abcb11	ATP-binding cassette, sub-family B (MDR/TAP), member 11	0.537628	0.502893	0.0165215	0.216029	0.366641	0.217229	0.0223836	0.0184464	0.0683256	0.000171763	0.196206	0.0744541	0.000854723	0.630763	0.489101	0.000760474
1449824_at	PRG4	proteoglycan 4 (megakaryocyte stimulating factor, articular superficial zone protein)	0.00975931	0.000621196	0.00192523	0.0205461	0.00394148	0.000727175	0.00182722	0.00282134	0.0100903	0.000493299	0.0131998	0.0109325	0.00122803	0.0145244	0.0134711	0.000623913
1449844_at	Slco1a1	solute carrier organic anion transporter family, member 1a1	0.0494194	0.000123051	0.00185281	0.0947028	0.00815435	0.00361753	0.00294691	0.00911979	0.0238184	9.43909e-05	0.0132609	0.0221903	0.0021884	0.0183301	0.0187646	0.000900873
1449854_at	NR0B2	nuclear receptor subfamily 0, group B, member 2	0.0103718	0.00212548	0.00189633	0.0163462	0.00528713	0.000643826	0.000974843	0.0283089	0.0203018	0.000581403	0.0122486	0.0120329	0.000876184	0.0205056	0.0885814	0.00402726
1449855_s_at	Uchl3	ubiquitin carboxyl-terminal esterase L3 (ubiquitin thiolesterase)	0.708454	0.00152344	0.00216309	0.918016	0.0953651	0.00658525	0.000882007	0.0633376	0.88128	0.0013777	0.456627	0.773447	0.002093	0.549105	0.624879	0.00865211
1449929_at	DYNLT3	dynein light chain Tctex-type 3	0.229603	0.00186015	0.000842113	0.0565727	0.191928	0.000947681	0.000717442	0.00172224	0.107218	0.000673573	0.021871	0.42989	0.0057849	0.100307	0.533661	0.0215428
1450007_at	LOC100048622	RIKEN cDNA 1500003O03 gene; similar to EF-hand Ca2+ binding protein p22	0.0357822	0.00182245	0.0358795	0.215656	0.141303	0.000197536	0.00289701	0.003339	0.144206	0.0016235	0.0218954	0.0157552	8.30186e-05	0.123202	0.0220727	5.91494e-05
1450010_at	HSD17B12	hydroxysteroid (17-beta) dehydrogenase 12	0.0618614	0	0.00150393	0.0668603	0.0984654	0.00106994	0.00089136	0.00623802	0.176844	0.00170898	0.0156422	0.276828	0.024679	0.0241632	0.0278024	3.681e-05
1450060_at	PIGR	polymeric immunoglobulin receptor	0.277542	0.00325	0.0575151	0.423298	0.27803	0.00753606	0.00249176	0.0468451	0.517799	0.000169404	0.542949	0.0587391	0.000285353	0.577596	0.596109	0.0219501
1450084_s_at	IVNS1ABP	influenza virus NS1A binding protein	0.0933737	0.00449391	9.52493e-05	0.0151742	0.00497562	0.00274795	0.0024398	0.00923398	0.020544	0	0.00811113	0.0967861	0.00290224	0.0114871	0.016179	0.000681011
1450112_a_at	Gas2	growth arrest specific 2	0.0161329	0.00243102	6.04146e-06	0.0112251	0.00392865	1.16416e-05	0.00130895	0.00327498	0.0120499	0.000538737	0.00656282	0.0196208	0.000882223	0.00971809	0.0101056	0.000530343
1450133_at	UGT2A3	UDP glucuronosyltransferase 2 family, polypeptide A3	0.0685102	0.00086542	0.000641219	0.0172988	0.0118505	0.0316752	0.104944	0.00303593	0.012805	0.00052264	0.0154234	0.0118086	1.13388e-05	0.0140453	0.0201335	1.32363e-05
1450226_at	PRLR	prolactin receptor	0.622001	0.0466991	0.0931157	0.577823	0.0566336	0.00110941	0.00220651	0.00516947	0.0585201	0.000308893	0.0197462	0.0319331	0.000246448	0.645606	0.0709923	0.00142996
1450261_a_at	SLC10A1	solute carrier family 10 (sodium/bile acid cotransporter family), member 1	0.096394	0.00708827	0.00134993	0.0277902	0.0137183	0.00133367	0.00587697	0.00295107	0.0143298	7.31517e-05	0.0227269	0.017087	0.000971826	0.0290665	0.0169519	1.05456e-05
1450264_a_at	CHKA	choline kinase alpha	0.0144537	0.0170537	0.00666289	0.0955251	0.00900531	0.00017451	0.000916328	0.00258377	0.0104853	0.000938149	0.00940779	0.020954	0.0029649	0.0187575	0.0175724	0.000139228
1450332_s_at	FMO5	similar to Flavin containing monooxygenase 5; flavin containing monooxygenase 5	0.0319538	0	0.000654899	0.0111486	0.00493495	0.00381907	0.0902021	0.00297636	0.0111891	0.000476326	0.00619949	0.0829709	0.00443187	0.0273188	0.0139627	0.000706072
1450394_at	Golph3	golgi phosphoprotein 3	0.583741	0.000835594	0.00336043	0.428137	0.586099	0.00193145	0.00351457	0.0243032	0.986781	0.00530425	0.0680834	0.200387	0.0116784	0.667147	0.71864	0.000338539
1450431_a_at	NEDD4	neural precursor cell expressed, developmentally down-regulated 4	0.570756	0.00276795	0.00161524	0.773859	0.317899	0.00146083	0.00314083	0.148945	0.899466	0.00472581	0.675425	0.904625	0.00469589	0.538154	0.907631	0.0252982
1450611_at	Orm3	orosomucoid 3	0.0151212	0.000849822	0.00311403	0.078751	0.0229767	0.00253392	0.0032642	0.00310393	0.0112738	0	0.00716464	0.0115741	0.00138523	0.0115039	0.0126317	0.000628316
1450642_at	secisbp2l	SECIS binding protein 2-like	0.864043	0.00203554	0.00164361	0.94871	0.102304	0.00613787	0.00386943	0.0383126	0.935129	0.00371408	0.239242	0.980133	0.0307465	0.263204	0.801957	0.0172286
1450643_s_at	ACSL1	acyl-CoA synthetase long-chain family member 1	0.0442697	0.00094394	0.000500983	0.0100874	0.00445712	0.000824113	0.00133101	0.00338489	0.0264374	0.000629021	0.00744071	0.0344011	0.00224767	0.0161276	0.0137374	0
1450646_at	cyp51	cytochrome P450, family 51	0.00976022	0.000545687	0.00049579	0.0104495	0.00482414	1.42324e-10	0.000991667	0.00288138	0.0127888	0.000526856	0.00949647	0.0216767	0.0025231	0.0158575	0.0109492	3.49249e-09
1450648_s_at	Rmcs5	response to metastatic cancers 5	0.0505006	0.00061437	0.000530742	0.0436811	0.071091	0.00107135	0.245606	0.0134173	0.0154179	0	0.0119127	0.282299	0.00492964	0.0173568	0.016107	0.000208792
1450655_at	pten	phosphatase and tensin homolog	0.896267	0.000268303	0.00467176	0.994265	0.0890189	0.00356621	0.00723808	0.26351	0.999969	0.00247485	0.132165	0.878733	0.100151	0.991771	0.993431	0.003016
1450696_at	psmb9	proteasome (prosome, macropain) subunit, beta type 9 (large multifunctional peptidase 2)	0.0107789	0	7.75955e-05	0.0588205	0.135505	0.00093952	0.00230699	0.0085628	0.0155138	0.000397199	0.00889203	0.0115867	0.00132412	0.0100319	0.0109966	1.97675e-08
1450714_at	AZIN1	antizyme inhibitor 1	0.923132	0.0112971	0.0394847	0.925269	0.0717016	0.00162136	0.00332689	0.098959	0.8495	0.0110755	0.113149	0.954419	0.0162216	0.630054	0.911546	0.0123456
1450715_at	Cyp1a2	cytochrome P450, family 1, subfamily a, polypeptide 2	0.0236012	0.000689304	0	0.0109047	0.00533713	0.00132999	0.00310283	0.0178066	0.0247866	0.000837687	0.0157283	0.0131666	0.000979417	0.0368199	0.0119633	1.48022e-05
1450717_at	Ang	angiogenin, ribonuclease, RNase A family, 5	0.0368504	0.00131289	0.0490717	0.715739	0.00892656	0.492581	0.00256917	0.00445627	0.0736102	0.000654069	0.0291239	0.0357538	3.08279e-05	0.0726988	0.0355639	0.00136708
1450721_at	acp1	predicted gene 7756; acid phosphatase 1, soluble; predicted gene 9723; similar to acid phosphatase 1, soluble; similar to protein-tyrosine-phosphatase	0.999834	0.0052824	0.0048755	0.999147	0.332688	0.00611042	0.018665	0.992378	1	0.00448226	0.997193	0.996417	0.00915845	1	1	0.00148103
1450744_at	ELL2	elongation factor RNA polymerase II 2	0.999985	0.00454997	0.00855074	0.875176	0.129817	0.00348836	0.0826153	0.0810271	0.987937	0.0228266	0.209998	0.973521	0.0210656	0.896898	0.967264	0.0330368
1450788_at	SAA1	serum amyloid A 1	0.0177846	0.00072018	0	0.0132452	0.0104603	0.00130649	0.000998137	0.00307341	0.0181567	0.00061801	0.00887659	0.0104131	0.000779854	0.0107755	0.0102089	0.000562703
1450826_a_at	Saa3	serum amyloid A 3	0.0107051	0.000528185	0.000496634	0.00962745	0.0197615	0.000650088	2.04783e-07	0.0029228	0.0107421	6.24547e-07	0.011021	0.0170849	0	0.0284956	0.0154735	0.000805484
1450852_s_at	F2R	coagulation factor II (thrombin) receptor	0.0128484	0.000471645	4.51369e-17	0.0110672	0.00592593	0.000542913	0.00131846	0.00348855	0.0146269	0.000387531	0.00883247	0.268937	0.0363646	0.0161664	0.0452302	0.00275979
1450874_at	LOC100046320	matrin 3; similar to Matrin 3	0.936374	0.00350646	0.00232387	0.948898	0.227093	0.00417906	0.00668542	0.0926832	1	0.00387012	0.628791	0.985	0.0410877	0.996249	0.992029	0.0108323
1450876_at	LOC100048018	complement component factor h; similar to complement component factor H	0.0204412	8.37665e-05	1.71723e-06	0.017255	0.00527214	0.00311557	0.00181799	0.00464256	0.0142697	0.000377195	0.0434537	0.108195	0.00161971	0.0898567	0.487906	0.0440479
1450877_at	BC005537	cDNA sequence BC005537	0.118996	0.00743651	0.00288083	0.0680544	0.0102714	0.00068252	0.000206081	0.00532208	0.132933	0.00159248	0.0105649	0.0273956	0.000768396	0.0177286	0.0158443	0
1450883_a_at	CD36	CD36 antigen	0.37206	0.0019424	0.0109726	0.231999	0.262025	0.000607276	0.00051863	0.00644902	0.537309	0.00126093	0.0285849	0.0935178	0.000905465	0.178427	0.165416	0.000151627
1450884_at	CD36	CD36 antigen	0.23254	0.00203975	0.00364489	0.102381	0.743523	0.000908227	0.000465127	0.00974441	0.237204	0.000533639	0.017466	0.0874237	0.00107966	0.0280632	0.102103	0.00305244
1450896_at	ARHGAP5	Rho GTPase activating protein 5	0.219125	0.00123542	0.00342846	0.0353347	0.0358048	4.55297e-05	0.00294535	0.00315982	0.0374141	0.000235636	0.0297071	0.261343	0.00709732	0.0301725	0.268732	0.00987152
1450897_at	ARHGAP5	Rho GTPase activating protein 5	0.938839	0.0101554	0.0256208	0.766594	0.446111	0.00299524	0.00278201	0.155067	0.929706	0.0030553	0.50276	0.935909	0.0766865	0.883494	0.94686	0.0605711
1450903_at	RAD23B	RAD23b homolog (S. cerevisiae)	0.0249239	0.00337414	0.00127734	0.924875	0.0813994	0.000373525	0.00478413	0.00532069	0.0350333	0.000860645	0.0134322	0.0362073	0.0019141	0.0260569	0.0249089	0.000251083
1450934_at	EIF4A2	eukaryotic translation initiation factor 4A2	0.115732	0.0058143	0.0217034	0.0971054	0.0178136	0.00200871	1.80195e-08	0.00274558	0.0357871	0.00122781	0.00985343	0.0747721	0.00220944	0.0273478	0.0131988	0.000482595
1450937_at	LIN7C	lin-7 homolog C (C. elegans)	0.926148	0.025218	0.00438545	0.965661	0.153269	0.00446114	0.00577209	0.165404	0.99971	0.00692342	0.462453	0.969769	0.0512743	0.990119	0.987541	0.00932817
1450942_at	Zfp830	zinc finger protein 830	0.0100637	0.000761719	0.000632887	0.0137102	0.00796617	0.000963966	0.0032982	0.00563507	0.0363119	0.00169479	0.0298154	0.0151203	0.000996888	0.0151082	0.00980026	1.39928e-05
1450954_at	YME1L1	YME1-like 1 (S. cerevisiae)	0.959189	0.00441421	0.00791628	0.981491	0.0706593	0.0049079	0.00759643	0.0630253	0.998086	0.00427319	0.125105	0.992082	0.0205209	0.96671	0.986434	0.016877
1450970_at	GOT1	similar to Aspartate aminotransferase, cytoplasmic (Transaminase A) (Glutamate oxaloacetate transaminase 1); glutamate oxaloacetate transaminase 1, soluble	0.0161149	1.16468e-05	0.000466855	0.0102173	0.00433426	0.11086	0.0733658	0.00337802	0.0141393	1.52738e-07	0.00783018	0.0313224	0.00189881	0.0117587	0.0157146	0.000531339
1450994_at	ROCK1	Rho-associated coiled-coil containing protein kinase 1	0.148462	0.000345836	1.30884e-05	0.0200536	0.0765394	0.00143749	0.00111623	0.00225238	0.0393528	0.000643487	0.0228347	0.203631	0.0105838	0.0401218	0.478415	0.0290714
1451025_at	arl1	ADP-ribosylation factor-like 1	0.930895	0.00617007	0.00484546	0.778637	0.435824	0.00446072	0.000667614	0.0226215	0.819977	0.00186856	0.127746	0.982402	0.00316874	0.636486	0.858316	0.0164607
1451054_at	ORM1	orosomucoid 1	0.0204943	0.000534888	0.0012261	0.015701	0.00412494	0.00173464	0.00169107	0.00289179	0.0108919	0	0.00665301	0.0117692	0.00129192	0.0111324	0.0116854	0.000569621
1451074_at	RNF13	ring finger protein 13	0.96886	0.00337958	0.00232321	0.481324	0.72471	0.00224401	0.0175062	0.0245014	0.99674	0.0151613	0.775145	0.712984	0.184367	0.955121	0.909855	0.101984
1451090_a_at	Gm2223	eukaryotic translation initiation factor 2, subunit 3, structural gene X-linked; similar to translation initiation factor eIF-2 gamma subunit; predicted gene 2223	0.961224	0.00706417	0.0436134	0.883254	0.186942	0.00363256	0.00341019	0.0845779	0.957733	0.00508428	0.454198	0.928092	0.00627142	0.978832	0.987543	0.00293364
1451109_a_at	NEDD4	neural precursor cell expressed, developmentally down-regulated 4	0.341256	0.000481026	0.00100383	0.498864	0.548383	0.00147347	0.000717914	0.0115105	0.778054	0.00061206	0.0467354	0.685932	0.00198472	0.147641	0.323672	0.00132931
1451122_at	Gm7655	isopentenyl-diphosphate delta isomerase; similar to Isopentenyl-diphosphate delta isomerase; predicted gene 7655	0.413318	0.00230131	0.00181551	0.844666	0.0950982	0.00237712	0.000716086	0.0107312	0.0783789	0.000313306	0.032825	0.929668	0.0152445	0.641046	0.674593	0.000793117
1451130_at	Use1	unconventional SNARE in the ER 1 homolog (S. cerevisiae)	0.0145542	0.000550309	0.000558775	0.0104537	0.00858859	0.0106447	0.0107741	0.00302764	0.0104685	1.05704e-05	0.00651485	0.0110806	7.94351e-09	0.0285087	0.0168694	0.000846642
1451166_a_at	LOC100047712	similar to coiled-coil domain containing 101	0.0200046	0.00110806	0.00324453	0.0665908	0.335526	0.000529149	0.00184625	0.00374615	0.0299158	3.66636e-09	0.0114232	0.03856	0.0230756	0.0140342	0.0177525	3.65514e-06
1451179_a_at	qk	similar to Quaking protein; quaking	0.982136	0.00260396	0.00318043	0.874334	0.350757	0.00398316	0.0118876	0.766165	0.9998	0.00421011	0.879891	0.990455	0.0169748	0.997906	0.647524	0.466609
1451184_at	LOC100045099	similar to heterogeneous nuclear ribonucleoprotein A3	0.224657	0.00253112	0.019235	0.969007	0.0280661	0.00305491	0.00304304	0.0218651	0.52584	0.00403569	0.072606	0.999789	0.00122375	0.180559	0.504765	0.00992154
1451190_a_at	Sbk1	SH3-binding kinase 1	0.0191337	0.000871692	0.000535996	0.0148083	0.0123725	0.00639893	0.00808036	0.00467051	0.0282044	0.00020559	0.0438737	0.0138635	0.00122754	0.0204849	0.0128395	0.000177073
1451204_at	SCARA5	scavenger receptor class A, member 5 (putative)	0.00946859	0.00349954	0.000578913	0.0121103	0.00420842	0.000677948	0	0.00411158	0.0100061	0.000481986	0.00872103	0.0123293	0.000798709	0.0405103	0.0208556	0.000967558
1451208_at	etf1	eukaryotic translation termination factor 1	0.448781	0.00832928	0.00116761	0.886429	0.126122	0.00079622	0.00137167	0.0836183	0.854261	0.00183656	0.0904639	0.455226	0.0326472	0.61164	0.692569	0.0028645
1451239_a_at	slc26a1	solute carrier family 26 (sulfate transporter), member 1	0.0188569	0.000963001	0.00116816	0.01873	0.00789125	0.996884	0.00542108	0.012923	0.0198628	0.00108168	0.0122252	0.0226428	0.00168938	0.0203128	0.0202049	0.000915692
1451276_at	UHRF1BP1L	UHRF1 (ICBP90) binding protein 1-like	0.327394	0.00215202	0.0024731	0.965968	0.112454	0.00237496	0.00314516	0.03192	0.986902	0.011535	0.104782	0.964645	0.0149306	0.336669	0.904408	0.0119049
1451316_a_at	PICALM	phosphatidylinositol binding clathrin assembly protein	0.940454	0.00408218	0.0122168	0.906835	0.254978	0.00304566	0.0105958	0.542842	0.999997	0.0147258	0.887682	0.941846	0.066093	0.974705	0.940275	0.0770251
1451335_at	PLAC8	placenta-specific 8	0.0156661	0.000501652	0.000479877	0.0149081	0.0192962	0.00223672	0.0570873	0.00303308	0.017326	0.00357123	0.026042	0.10313	0.00168818	0.0188519	0.0108368	0
1451383_a_at	CHUK	conserved helix-loop-helix ubiquitous kinase	0.387485	0.00149191	0.001781	0.982768	0.0232502	0.00140353	0.00357662	0.0157464	0.873276	0.0220977	0.102724	0.971229	0.016456	0.123844	0.0775278	0.00151947
1451452_a_at	RGS16	regulator of G-protein signaling 16	0.0113205	0.00288076	0.00239978	0.0707815	0.0148882	0.00120952	0.0014115	0.00299594	0.0110753	0.000634746	0.00953267	0.0152747	0.00128145	0.0487756	0.011111	0.000515795
1451457_at	Sc5d	sterol-C5-desaturase (fungal ERG3, delta-5-desaturase) homolog (S. cerevisae)	0.0313095	0.00226958	0.000140742	0.175198	0.0123176	0.00200797	0.00301841	0.00371125	0.0309574	1.80167e-05	0.0087448	0.354062	0.00842638	0.035099	0.0186722	0.000456558
1451460_a_at	SLC22A7	solute carrier family 22 (organic anion transporter), member 7	0.0256431	0.000605723	0.000863993	0.0356512	0.0100502	0.664787	0.0289185	0.00975715	0.780826	0.00171476	0.273868	0.0313034	0.00106954	0.0301614	0.0257072	0.00068425
1451548_at	UPP2	uridine phosphorylase 2	0.0355506	0.0972156	0.00748606	0.0846681	0.00722279	0.000725822	0.000113236	0.00433598	0.0175095	0	0.00786544	0.0220045	0.00160071	0.0258265	0.0137456	6.24996e-07
1451557_at	TAT	tyrosine aminotransferase	0.0152969	0.000530659	0.000912592	0.0194511	0.00398649	0.00758254	0.0145643	0.00366283	0.0103424	2.09046e-06	0.00698248	0.0283643	0.0019399	0.0128335	0.0098058	0.00053449
1451577_at	ZBTB20	zinc finger and BTB domain containing 20	0.809917	0.00195365	0.013866	0.993485	0.0805914	0.00411633	0.00634098	0.961255	0.999083	0.00647729	0.467625	0.997888	0.00554284	0.895993	0.982316	0.00890411
1451588_at	1810022C23Rik	RIKEN cDNA 1810022C23 gene	0.033667	0.00493811	0.00505985	0.0702824	0.0232336	0.000661874	0.00214712	0.00289196	0.015562	0	0.0201576	0.0314336	0.0041037	0.101227	0.0620705	0.00510142
1451600_s_at	Gm4738	esterase 31; predicted gene 4738	0.0128347	0.00105446	0.000782309	0.0202069	0.0101674	0.000785926	0.00102032	0.00535171	0.0171505	0.000624385	0.00631513	0.0339063	0.00169264	0.00925042	0.0098481	0.000535243
1451635_at	D630002G06Rik	RIKEN cDNA D630002G06 gene	0.0598702	0.0136244	0.0119069	0.4473	0.0818801	0.000847839	0.000282492	0.00559293	0.0151757	0.000299746	0.0103729	0.0367277	0.000992562	0.0261733	0.0228006	0.000365564
1451666_at	ACLY	ATP citrate lyase	0.0134404	0.00196115	0.000566862	0.0149281	0.00386383	0.00647898	0.00157744	0.00368848	0.0126986	0	0.00845684	0.0201773	0.000778161	0.0095383	0.0110097	0
1451675_a_at	alaS2	aminolevulinic acid synthase 2, erythroid	0.0144138	0.0148727	0.00645694	0.204515	0.022841	0.000832319	2.99924e-05	0.00299752	0.0111578	0.000504064	0.0082511	0.0115918	0.000755691	0.0283616	0.0305419	0.0016579
1451681_at	BC089597	cDNA sequence BC089597	0.0546561	0.012105	0.00394868	0.0353597	0.00712428	3.89538e-07	0.00185258	0.0107023	0.0761099	0.00144473	0.0501303	0.0880488	0.0224282	0.90461	0.0546267	0.00106532
1451683_x_at	H2-L	histocompatibility 2, D region; histocompatibility 2, D region locus 1	0.0101045	0.000527578	0.000576349	0.0101941	0.00667404	0.00184598	0.00946281	0.00353375	0.011475	0.000508654	0.00631973	0.0306729	0.00127575	0.00997575	0.00995763	0.000548128
1451701_x_at	CLDN3	claudin 3	0.0285721	0.00105339	0.000189645	0.0163053	0.00606689	0.00609564	0.00317157	0.0124029	0.0206263	5.89524e-05	0.0102309	0.0176845	0.00197253	0.0348743	0.734786	0.0125831
1451716_at	Mafb	v-maf musculoaponeurotic fibrosarcoma oncogene family, protein B (avian)	0.0202741	0.00104553	0.00216761	0.015918	0.00393958	0.00138823	0.00149965	0.00430635	0.0190829	0.000585431	0.0073477	0.0121684	0.00254581	0.0145152	0.0155328	0.000868898
1451721_a_at	Rmcs5	response to metastatic cancers 5	0.0580639	0.000100248	0.000117501	0.0194923	0.0308768	0.00194842	0.130268	0.00567137	0.0759895	0.00769383	0.106666	0.862386	0.00958894	0.0288294	0.0395337	0.00102297
1451731_at	ABCA3	ATP-binding cassette, sub-family A (ABC1), member 3	0.0213087	0.00128088	0.00255776	0.022208	0.00775624	0.00179873	0.0198124	0.0055793	0.0367098	0.00121048	0.155091	0.0202057	0.00543592	0.0203546	0.0207992	0.000806072
1451742_a_at	UGP2	UDP-glucose pyrophosphorylase 2	0.0855499	0.00740352	0.00216203	0.172866	0.226192	0.000511316	0.000862704	0.00593314	0.299461	0.000267731	0.0166683	0.227088	0.0118684	0.0360231	0.0356766	0.000536573
1451784_x_at	H2-L	histocompatibility 2, D region; histocompatibility 2, D region locus 1	0.0110435	0	0.00100857	0.0105525	0.00392708	0.000804682	0.00339122	0.005014	0.0107967	0	0.00678421	0.0285931	0.00155448	0.01032	0.00998563	0.000531976
1451931_x_at	H2-L	histocompatibility 2, D region; histocompatibility 2, D region locus 1	0.00999419	0	3.73128e-06	0.00942692	0.00461453	0.000915204	0.00317921	0.00350931	0.0102182	0	0.00674425	0.0290041	0.00100391	0.00946671	0.00979262	0.000526805
1451943_a_at	PPM1A	protein phosphatase 1A, magnesium dependent, alpha isoform	0.0884352	0.00153636	0.0109591	0.715928	0.160172	0.000975612	0.00137283	0.00794961	0.194946	0.00484277	0.0421735	0.0560914	0.00395911	0.195872	0.0375723	0.000356697
1451956_a_at	SIGMAR1	sigma non-opioid intracellular receptor 1	0.0164198	0.000996743	0.00129501	0.0418854	0.00594748	0.00363187	0.00139059	0.00289675	0.0246509	0.00220197	0.0107382	0.0250576	0.00102922	0.0351546	0.0111145	0.000622863
1451979_at	Kras	similar to GTPase KRas precursor (K-Ras 2) (Ki-Ras) (c-K-ras) (c-Ki-ras); v-Ki-ras2 Kirsten rat sarcoma viral oncogene homolog	0.0294789	0.000487489	0.00247196	0.174209	0.216057	0.000605182	0.000299184	0.0208638	0.493339	0.000688507	0.0276697	0.211021	0.00211567	0.225334	0.527619	0.00603804
1451989_a_at	MAPRE2	microtubule-associated protein, RP/EB family, member 2	0.0636315	0.0101622	0.00550105	0.245898	0.0592934	0.0163336	0.00495695	0.0141619	0.024934	0.00010173	0.017201	0.960821	0.00463186	0.023725	0.0243384	3.56827e-05
1452035_at	Col4a1	collagen, type IV, alpha 1	0.0104985	6.39357e-08	5.08935e-06	0.013506	0.00423131	0.00341796	0.00373778	4.25602e-05	0.0258786	0.000915532	0.0124813	0.0330437	0.00170622	0.0120082	0.0120355	9.53111e-09
1452045_at	Zfp281	zinc finger protein 281	0.647065	0.00232718	0.00316545	0.979407	0.068921	0.00767252	0.00420216	0.518449	0.999652	0.00344715	0.391832	0.835297	0.0427175	0.984101	0.995039	0.007008
1452116_s_at	LOC100047997	activating transcription factor 2; similar to Cyclic AMP-dependent transcription factor ATF-2 (Activating transcription factor 2) (cAMP response element-binding protein CRE-BP1) (MXBP protein)	0.533535	0.00117344	0.000741973	0.924909	0.108982	0.0021239	0.00776841	0.257933	0.907572	0.0150727	0.301518	0.968667	0.00528394	0.58057	0.722428	0.00874413
1452163_at	ETS1	E26 avian leukemia oncogene 1, 5' domain	0.167822	0.00413219	0.0016882	0.999999	0.0280999	0.0289556	0.0190569	0.221308	0.997691	0.00126842	0.12054	0.996329	0.00470653	0.968191	0.965524	0.00622135
1452167_at	2810407C02Rik	RIKEN cDNA 2810407C02 gene	0.978711	0.00355124	0.00309963	0.969705	0.311404	0.00627109	0.0222458	0.640884	1	0.00690813	0.83582	0.994577	0.023478	0.999024	0.979364	0.0346388
1452215_at	9130401M01Rik	RIKEN cDNA 9130401M01 gene	0.0246292	0.00957116	0.00349377	0.0654688	0.0939044	0.00159802	0.00234486	0.00772383	0.13506	0.00145978	0.0161487	1	0.00138144	0.0344427	0.07535	0.00167824
1452225_at	2010106G01Rik	RIKEN cDNA 2010106G01 gene	0.746623	0.00101698	0.00141523	0.402791	0.503065	0.000829036	0.00559195	0.0207491	0.891948	0.00333274	0.119728	0.97777	0.00759377	0.223306	0.907183	0.0696574
1452260_at	CIDEC	cell death-inducing DFFA-like effector c	0.0232267	0.000359308	0.000262959	0.0473086	0.0169268	0.847753	0.0508776	0.00878839	0.110324	2.07434e-05	0.0280917	0.317699	0.00468558	0.179474	0.0497591	0.000331534
1452302_at	arhgef10	Rho guanine nucleotide exchange factor (GEF) 10	0.168165	0.00507845	0.00546622	0.0442869	0.00709799	0.00298767	0.001703	0.00814091	0.0526269	0.0012546	0.039515	0.0415843	0.000364536	0.0284698	0.0329026	0.00085904
1452353_at	GPR155	G protein-coupled receptor 155	0.19946	0.00118511	0.00160259	0.041444	0.0329812	0.0036154	0.00702517	0.00314476	0.0734641	1.14175e-05	0.0108776	0.192892	0.00123256	0.0720335	0.494843	0.00987305
1452417_x_at	LOC100047628	immunoglobulin kappa chain variable 21 (V21)-1; similar to Chain L, Structural Basis Of Antigen Mimicry In A Clinically Relevant Melanoma Antigen System	0.0616905	0.00142809	0.00076313	0.0102898	0.00682645	0.000637037	0.00274692	0.00314637	0.0112444	0.000459933	0.00755028	0.0801172	0.00509751	0.0298475	0.022285	0
1452418_at	1200016E24Rik	RIKEN cDNA 1200016E24 gene	0.0176858	0.000667153	0.000190398	0.0320677	0.00633497	0	0.000885217	0.00696068	0.0492988	0.0015569	0.138573	0.0173944	0.000600762	0.0136902	0.0413421	0.000204511
1452426_x_at	1452426_x_at	--	0.0100546	1.06249e-06	0	0.0120732	0.0217994	7.0549e-06	0.00270508	0.00327716	0.0550918	0.000468852	0.0479848	0.00956874	0.000742222	0.0119803	0.0128606	0.000788977
1452427_s_at	ptplad1	protein tyrosine phosphatase-like A domain containing 1	0.0292244	0.00107734	0.0156805	0.288592	0.0586781	0.000688729	0.000974342	0.00533932	0.117955	0.00265712	0.159795	0.0252916	0.000975741	0.0318948	0.0157211	0.000462107
1452431_s_at	H2-Ea	histocompatibility 2, class II antigen A, alpha; histocompatibility 2, class II antigen E alpha	0.0343129	0.000881117	0.000187695	0.0256783	0.0525741	0.00296584	0.50278	0.00394886	0.0289579	0.00256832	0.0454874	0.36598	0.00830314	0.0160583	0.0204035	0.000239741
1452445_at	SLC41A2	solute carrier family 41, member 2	0.0101563	0.00178139	0	0.00958949	0.00418814	0.000799756	0.00101696	0.00338853	0.0105619	0.000736105	0.0109236	0.00992876	0.00107003	0.0319914	0.0353408	0.00136184
1452463_x_at	1452463_x_at	--	0.120771	0.00102601	0.000762443	0.0137285	0.0047609	0.000620857	9.36491e-05	0.00312234	0.00962338	6.44145e-05	0.00853922	0.0494563	0.00633812	0.0155831	0.0221063	0.000817151
1452494_s_at	Slco1b2	solute carrier organic anion transporter family, member 1b2	0.736642	0.0094861	0.00595044	0.123589	0.29441	0.000829175	0.00173271	0.00968964	0.562039	0.001459	0.125233	0.186823	0.00100778	0.852223	0.843187	0.00232727
1452540_a_at	Gm13646	similar to Hist1h2bj protein; histone cluster 1, H2bl; predicted gene, OTTMUSG00000013203; histone cluster 1, H2bj; histone cluster 1, H2bf; H2b histone family member; histone cluster 1, H2bn	0.0186628	0.000479548	0.00054669	0.0111503	0.00861327	0.00157577	0.00233676	0.112086	0.0575976	6.94866e-05	0.0105802	0.015413	0.000951922	0.0310048	0.025786	0.000674692
1452587_at	Actr2	ARP2 actin-related protein 2 homolog (yeast); predicted gene 6828	0.974244	0.00577106	0.00393881	0.996961	0.0989228	0.00587419	0.00799693	0.365443	0.999799	0.00527061	0.697207	0.995451	0.0186465	0.990486	0.995374	0.0101896
1452649_at	rtn4	reticulon 4	0.231213	0.0111285	0.0364616	0.296693	0.0169022	0.00137495	0.00168996	0.00604384	0.0565824	0.0003241	0.0150428	0.913199	0.00281797	0.0954514	0.176448	0.00422228
1452659_at	Dek	DEK oncogene (DNA binding)	0.523859	0.00553891	0.00597226	0.350282	0.339647	0.00134376	0.000948977	0.0107283	0.229296	2.83029e-05	0.0856287	0.893745	0.0241422	0.203104	0.502522	0.00647702
1452661_at	TFRC	transferrin receptor	0.012678	0.00395337	0.00464271	0.0208379	0.00551682	0.00113216	0.00142008	0.00394408	0.0134732	0.000427458	0.0100834	0.0136575	0.000130238	0.226809	0.0846632	0.00372034
1452716_at	5730469M10Rik	RIKEN cDNA 5730469M10 gene	0.0511394	0.00159662	0.0030098	0.0475119	0.0222517	0.000197851	0.00202939	0.00601863	0.0268569	0.000691631	0.0182639	0.181093	0.00617003	0.0393274	0.0768433	0.000448039
1452735_at	PCNP	PEST proteolytic signal containing nuclear protein	0.502557	0.00173165	0.00257741	0.0571261	0.0434066	0.0028413	0.00380675	0.00722571	0.0376605	0.000473945	0.0159059	0.0323568	0.00258925	0.129291	0.239589	0.0151536
1452754_at	CRELD2	cysteine-rich with EGF-like domains 2	0.0128214	0.0432143	0.0399542	0.0119745	0.00508786	0.00239924	5.38432e-05	0.00469042	0.0169904	2.31642e-05	0.0193278	0.0121715	4.01201e-05	0.0234305	0.0282271	0.00156476
1452767_at	RRBP1	ribosome binding protein 1	0.054851	1.70841e-06	0.0112343	0.102416	0.0459892	3.32594e-07	2.22426e-11	0.00458361	0.0719629	0.00311828	0.0154149	0.0954326	0.00108437	0.0146861	0.0688929	0.00105278
1452778_x_at	NAP1L1	similar to nucleosome assembly protein 1-like 1; nucleosome assembly protein 1-like 1	0.0692544	0.00130115	0.00171533	0.252816	0.144791	0.00145392	0.000357914	0.00785748	0.136649	4.90295e-05	0.0129353	0.45227	0.00697806	0.0313426	0.128304	0.00252825
1452784_at	Itgav	integrin alpha V	0.166039	0.000759479	0.00156054	0.295456	0.124429	0.00118237	0.00136852	0.00584777	0.282382	0.00101685	0.0252387	0.782106	0.075629	0.0659076	0.732069	0.0257453
1452986_at	hgd	homogentisate 1, 2-dioxygenase	0.0134853	0.000606343	0.000947993	0.0205911	0.00875418	0.00416159	0.00735592	0.0029642	0.0112298	0.000575508	0.0301261	0.0177251	0.00266684	0.00980686	0.0102384	0.000551635
1453095_at	RAB10	RAB10, member RAS oncogene family	0.993139	0.0136116	0.0103508	0.957497	0.42796	0.00589818	0.0090028	0.97025	0.999994	0.00760552	0.969958	0.995094	0.0106137	0.99979	0.9662	0.0563526
1453208_at	2700089E24Rik	RIKEN cDNA 2700089E24 gene	0.844189	0.00490624	0.00165499	0.380392	0.777901	0.00202623	0.00290718	0.294053	0.98204	0.00382308	0.454077	0.942908	0.028821	0.817821	0.8598	0.116592
1453238_s_at	1200016E24Rik	RIKEN cDNA 1200016E24 gene	0.0147207	0.00059981	0.000802425	0.0192804	0.00746095	0.00196003	0.00169808	0.00567865	0.0633339	0.00143843	0.088944	0.0129079	0.000990248	0.0141337	0.0192571	0
1453299_a_at	LOC100045567	similar to purine nucleoside phosphorylase; purine-nucleoside phosphorylase 1	0.0113731	0.000976134	0.000759339	0.0128268	0.00446504	0.000712482	0.0016421	0.00335409	0.0111068	0.000593855	0.010577	0.0287611	0.00208848	0.132949	0.0260536	5.68935e-05
1453651_a_at	Gm8219	similar to brain protein 44-like protein; brain protein 44-like; predicted gene 3452; predicted gene 8219	0.0252623	0.000897162	0.0013108	0.0159957	0.00673595	9.59746e-05	0.000996283	0.0057804	0.0436979	0.000859482	0.00752069	0.0161658	0.00138194	0.024973	0.0115612	0
1453836_a_at	MGLL	monoglyceride lipase	0.0272817	0.000538462	0.000600445	0.00974638	0.00442065	0.005843	0.00168868	0.00289051	0.0112607	0	0.00712149	0.0206471	0.00102126	0.0191574	0.010324	0.000533845
1453988_a_at	IDE	insulin degrading enzyme	0.115604	0.00413253	0.00446633	0.715778	0.304702	0.000809378	0.00215893	0.0298303	0.954468	0.000940907	0.0334254	0.174688	0.0237482	0.0682894	0.0521383	4.07022e-05
1454064_a_at	RNF138	ring finger protein 138	0.517293	0.000702674	0.00202578	0.0966219	0.325586	1.30356e-06	0.00187507	0.00665671	0.295846	0.00363139	0.0204714	0.114997	0.00426248	0.0431492	0.0543746	0.000370139
1454067_a_at	4931406C07Rik	RIKEN cDNA 4931406C07 gene	0.957511	0.00447967	0.0072717	0.754991	0.254991	0.00195628	0.00691635	0.0200859	0.896367	0.00157641	0.200875	0.773562	0.0326302	0.737812	0.707535	0.0186904
1454159_a_at	igfbp2	insulin-like growth factor binding protein 2	0.0165446	0.000784066	0.000710589	0.027531	0.00882424	0.0355679	0.00769748	0.00328325	0.0113897	0.000615691	0.00704632	0.0131184	3.13196e-10	0.164403	0.0182011	0.0008954
1454268_a_at	CYBA	cytochrome b-245, alpha polypeptide	0.056203	0	0.000530038	0.0164621	0.0377055	0.00138746	0.0292413	0.00349643	0.0124567	0.00126148	0.00813335	0.0408972	0.00123786	0.0104013	0.0120514	0.000533639
1454610_at	37864	septin 7	0.976935	0.00438935	0.00404808	0.681022	0.66257	0.0040964	0.0075807	0.831734	0.999801	0.000889432	0.961195	0.99888	0.00992544	0.956856	0.683461	0.422363
1454638_a_at	pah	phenylalanine hydroxylase	0.0264494	0.00162239	0.000493483	0.00991305	0.00399028	0.0455662	0.0453668	0.00296931	0.0109342	0	0.00773399	0.0168468	0.00118819	0.011611	0.0124366	0.000530463
1454663_at	LOC100047658	similar to Eukaryotic translation initiation factor 5; eukaryotic translation initiation factor 5	0.367094	0.00143215	0.0166803	0.319182	0.194092	0.000188484	0.0137706	0.00773025	0.530921	0.00271557	0.0341503	0.315648	0.00302701	0.283551	0.537962	0.00687217
1454697_at	SEC62	SEC62 homolog (S. cerevisiae)	0.529142	0.00119897	0.00978298	0.0385371	0.0238237	0.000466148	0.00191445	0.00465377	0.0679092	0.000951583	0.0109924	0.141363	0.000304144	0.0156174	0.0428361	0.000649879
1454722_at	pten	phosphatase and tensin homolog	0.995846	0.00441401	0.00333045	0.99782	0.0899277	0.00500996	0.0138212	0.6277	0.999776	0.0122298	0.733822	0.999748	0.00929222	0.984331	0.996674	0.00846915
1454758_a_at	Tsc22d1	TSC22 domain family, member 1	0.0136159	0.000965255	0.00135797	0.0218671	0.00374249	0.00118517	0.00110105	0.00375511	0.00949134	6.79384e-06	0.00626517	0.00990843	7.4441e-10	0.0128812	0.023066	0.000991204
1454811_a_at	SERINC1	serine incorporator 1	0.94142	0.00284102	0.00413097	0.737305	0.59549	0.00331322	0.00355851	0.0610118	0.998214	0.00111345	0.0769934	0.84154	0.0841249	0.915081	0.928567	0.00309555
1454955_at	IPO7	importin 7	0.99701	0.00275705	0.00545176	0.987393	0.616741	0.00370336	0.00718728	0.69133	1	0.0235061	0.666244	0.971241	0.0716022	0.999981	0.998056	0.00651108
1454971_x_at	Tsc22d1	TSC22 domain family, member 1	0.0109026	0.000937107	0.00283168	0.0502445	0.00396057	0.00151596	2.39013e-05	0.00570738	0.0157553	0.000519791	0.010627	0.0106361	0.000840716	0.0138662	0.0855265	0.00227838
1455002_at	LOC100044642	similar to tyrosine phosphatase; predicted gene 8783; predicted gene 15801; predicted gene 5951; protein tyrosine phosphatase 4a1; similar to killer cell lectin-like receptor subfamily A member 2	0.219294	0.00168216	0.0198067	0.984385	0.0352116	0.00203153	0.0034964	0.0282395	0.796996	0.00543116	0.06305	0.85036	0.107681	0.79648	0.843894	0.00807302
1455007_s_at	GPT2	glutamic pyruvate transaminase (alanine aminotransferase) 2	0.0318398	0.00135423	0.00672632	0.125677	0.0285221	0.0252778	0.971329	0.00518995	0.0197543	0.000686468	0.0163944	0.0190204	0.00109559	0.0277692	0.0617629	0.00258776
1455054_a_at	LOC100046841	similar to RP42; DCN1, defective in cullin neddylation 1, domain containing 1 (S. cerevisiae)	0.954618	0.00424314	0.00593342	0.832986	0.57208	0.00347522	0.00909951	0.17065	0.99998	0.00242101	0.99036	0.952517	0.0364337	0.972811	0.97658	0.0277634
1455061_a_at	ACAA2	acetyl-Coenzyme A acyltransferase 2 (mitochondrial 3-oxoacyl-Coenzyme A thiolase)	0.0129795	0.000713945	0.00128385	0.0161462	0.00565692	0.00123764	0.00114993	0.00305912	0.0183641	0.000903159	0.00841016	0.0119024	0.000885971	0.0645901	0.0126869	4.73696e-08
1455066_s_at	MIA3	melanoma inhibitory activity 3	0.953125	0.0272585	0.0270101	0.698335	0.637158	0.00264766	0.00786037	0.902992	0.994096	0.00321139	0.701496	0.989494	0.00398022	0.882099	0.954476	0.0430603
1455100_at	AKR1D1	aldo-keto reductase family 1, member D1	0.281729	0.262134	0.0231694	0.29593	0.152741	0.000591615	0.0184411	0.00419232	0.0240704	9.79528e-05	0.0101006	0.0217473	0.000764705	0.0169632	0.0238743	0.000568175
1455265_a_at	RGS16	regulator of G-protein signaling 16	0.0170518	0.00135349	0.000474372	0.0114516	0.00450753	0.00154493	0.00302853	0.00302177	0.0461094	0.0062431	0.104132	0.0138745	0.00105083	0.0109609	0.00952643	0
1455282_x_at	ALAS1	aminolevulinic acid synthase 1	0.0111304	0.00126887	0.00149951	0.131807	0.00426442	0.00103911	0.00294335	0.00314159	0.0102893	0.00176732	0.0191459	0.0106931	0.00073336	0.00899802	0.0149875	0.000781557
1455393_at	CP	ceruloplasmin	0.0401636	0.00158235	0.0315347	0.350303	0.142632	5.04035e-05	0.000178383	0.00594783	0.0515982	0.000357335	0.00998733	0.311644	0.0145001	0.0185191	0.0485253	0.00115129
1455439_a_at	LGALS1	lectin, galactose binding, soluble 1	0.0469652	0.003251	0.00690497	0.0711072	0.0152546	0.544547	0.00464602	0.00776298	0.0276123	0.000288179	0.0213113	0.678345	0.213692	0.0272104	0.0245448	5.31816e-05
1455457_at	LOC100044352	similar to cytochrome P450; cytochrome P450, family 2, subfamily c, polypeptide 54	0.0537566	0.000778244	0.000894178	0.0160672	0.00406331	0.0207313	0.690183	0.00438054	0.0210967	0.00142159	0.0304745	0.0247136	0.000434568	0.0768303	0.0569743	0.00194279
1455480_s_at	ube2d3	ubiquitin-conjugating enzyme E2D 3 (UBC4/5 homolog, yeast); similar to UBE2D3; predicted gene 4596; predicted gene 15361	0.0201305	0.000782213	0.00444358	0.0930489	0.0183393	0.00060754	0.000944686	0.00669681	0.175763	0.00513549	0.0575047	0.0304354	0.00128212	0.0282686	0.0278254	0.000121062
1455490_at	PIGR	polymeric immunoglobulin receptor	0.0166746	0.00185164	0.00423726	0.0525857	0.0471751	0.00514968	0.00256866	0.00304651	0.0172146	0.00102951	0.117526	0.0151986	0.000886871	0.0137172	0.0468854	0.00205623
1455593_at	Apob	apolipoprotein B	0.0696442	0.000530953	0.000976817	0.206164	0.707997	0.00173207	0.000983712	0.0131672	0.329476	0.00385862	0.0801424	0.835198	0.107212	0.0802415	0.539589	0.0214775
1455806_x_at	NDUFA12	NADH dehydrogenase (ubiquinone) 1 alpha subcomplex, 12	0.0259809	0.00402451	0.0367212	0.46083	0.016312	2.04542e-05	0.00156749	0.00688214	0.0469331	0.000862582	0.160975	0.0275463	0.00253362	0.0229456	0.0263364	0.000953596
1455820_x_at	SCARB1	scavenger receptor class B, member 1	0.0133848	0.00405688	0.00184158	0.101751	0.256062	0.00525164	0.00620112	0.0063738	0.533543	0.00162377	0.0193103	0.147266	0.0200951	0.0595641	0.07029	4.68778e-06
1455869_at	Camk2b	calcium/calmodulin-dependent protein kinase II, beta	0.216148	0.00182416	0.00225625	0.130445	0.30114	0.00356095	0.00254668	0.0780747	0.152631	0.000114675	0.997318	0.0832267	0.00083914	0.0580601	0.046956	6.31188e-09
1455892_x_at	1455892_x_at	--	0.0774827	1	1	0.0485754	0.0381808	0.00167643	0.00232053	0.0110701	0.0625604	0.011382	0.916098	0.0674787	0.00680201	0.28027	0.52475	0.0164085
1455897_x_at	HMGN1	predicted gene 11663; predicted gene 2992; predicted gene 7862; high mobility group nucleosomal binding domain 1; similar to high mobility group nucleosomal binding domain 1	0.0316195	0.000511954	0.00186872	0.2809	0.0214399	0.000546531	0.00129899	0.0128387	0.0700836	0.0012419	0.0121879	0.37528	0.00195079	0.0177039	0.0440937	0.000273319
1455899_x_at	socs3	suppressor of cytokine signaling 3	0.00970646	0.00520199	2.47057e-07	0.00972918	0.00394763	0.000642018	0.00108122	0.00689316	0.0208524	0.000731731	0.00627583	0.0113671	0.000758192	0.0150154	0.0397787	0.00357088
1455900_x_at	tgm2	transglutaminase 2, C polypeptide	0.0213084	0.00395926	0.000684003	0.021302	0.0106997	0.0124534	0.0130944	0.00314499	0.0158575	0	0.00699876	0.021478	0.000778997	0.0137525	0.0125174	0.000685004
1455901_at	7120451J01Rik	RIKEN cDNA 7120451J01 gene; choline phosphotransferase 1	0.0925141	0.000633351	0.000704232	0.0260674	0.0109893	2.05183e-05	0.00154341	0.00448854	0.0208008	0.000114659	0.0544397	0.0439456	0.0020834	0.0369511	0.74898	0.123566
1455930_at	1455930_at	--	0.0126633	0.00128229	0.00205754	0.0286008	0.00480383	1.16977e-08	0.00167035	0.00344703	0.0329911	0.00063708	0.00749607	0.0112435	0.000790348	0.0713201	0.0136407	0.000564182
1455959_s_at	GCLC	glutamate-cysteine ligase, catalytic subunit	0.0199373	0.00168111	0.0188798	0.194486	0.00899467	0.001438	0.00106561	0.0065194	0.0287483	0.00120846	0.00857543	0.0159014	6.46901e-05	0.0135386	0.0129292	0.000119931
1455961_at	MME	membrane metallo endopeptidase	0.0211311	0.0669344	0.00342741	0.0485742	0.0909344	0.000783942	0.00187688	0.012092	0.0302381	4.04826e-06	0.0192506	0.34204	0.00733397	0.0291831	0.0308258	0.000715626
1455991_at	ccbl2	cysteine conjugate-beta lyase 2	0.0276312	0.0005569	0.000679131	0.00916698	0.00400485	0.000620464	0.0457044	0.00379977	0.0342806	0.000503664	0.0102379	0.0252303	0.00574772	0.0270135	0.0118555	0
1456014_s_at	fermt3	fermitin family homolog 3 (Drosophila)	0.071302	4.11507e-05	0.000467135	0.0830031	0.500528	0.00526163	0.110909	0.00290117	0.0173316	0.00407314	0.0121074	0.0682066	0.000533705	0.0510368	0.0238263	0.000468721
1456036_x_at	GSTO1	glutathione S-transferase omega 1	0.0521885	3.17338e-05	0.00127369	0.0633951	0.00949121	0.000256613	0.00120546	0.004283	0.062622	0.00012019	0.0115362	0.300364	0.0193622	0.0237791	0.0195991	0.000623511
1456037_x_at	PREB	prolactin regulatory element binding	0.0158667	0.0977044	0.00617567	0.215212	0.0640116	0.000598571	0.00101339	0.00439052	0.120409	0.000925464	0.0101399	0.0393387	0.00681935	0.014002	0.0337242	0.000664896
1456057_x_at	TMEM109	transmembrane protein 109	0.0140547	0.0024728	0.00773806	0.164995	0.111252	0.00435019	0.00111282	0.0114726	0.0903816	0.000636903	0.0146906	0.0449786	0.00672288	0.0198297	0.0134688	0.000559965
1456080_a_at	SERINC3	serine incorporator 3	0.0404248	0.0006044	0.00590444	0.456559	0.0590751	4.45553e-06	0.000530631	0.00665714	0.111609	0.00517554	0.433058	0.0411795	0.00315365	0.171097	0.110635	0.000586754
1456112_at	LOC100043998	similar to nuclear pore complex-associated intranuclear coiled-coil protein TPR; translocated promoter region	0.332932	0.00246616	0.00306555	0.985735	0.0605554	0.00303897	0.00533102	0.104132	0.995727	0.00190754	0.0723493	0.9976	0.00723315	0.863278	0.913459	0.018114
1456125_a_at	Gm11582	similar to cytoplasmic dynein light chain 1; predicted gene 11582; dynein light chain LC8-type 1; predicted gene 6788	0.00983029	0.000809183	0.000543129	0.00957896	0.00404063	0.000654945	0.00179225	0.00533039	0.0166979	0.000504494	0.00641492	0.0107766	0.000952087	0.00974453	0.00995841	0.000524757
1456174_x_at	ndrg1	N-myc downstream regulated gene 1	0.0169101	0.00362957	0.0089802	0.56734	0.151716	0.000912997	0.000833825	0.00641984	0.0333708	0.000398062	0.0102031	0.0661653	0.030056	0.0296464	0.0266517	0.000697182
1456195_x_at	Itgb5	integrin beta 5	0.0107456	0.00181473	0.00193584	0.0307728	0.0966285	0.00103411	0.00144288	0.00463142	0.0362003	0.00048319	0.0127092	0.0261694	0.00516731	0.0226006	0.0341991	0.000766326
1456212_x_at	socs3	suppressor of cytokine signaling 3	0.0109479	0.00754397	0.000658686	0.0106517	0.00451505	0	0	0.0079271	0.0274906	0.00111251	0.00636358	0.0102159	0	0.0118347	0.0250263	1.16468e-05
1456251_x_at	tspO	translocator protein	0.0228704	0.0450622	0.00577096	0.454664	0.168635	0.000804801	0.000312776	0.00484615	0.0932879	0.000276053	0.0466004	0.12556	0.317296	0.0314429	0.0143961	6.0331e-08
1456292_a_at	VIM	vimentin	0.0202355	1.29507e-06	7.77919e-06	0.0187178	0.0167335	0.00200386	0.133503	0.00349319	0.0166892	0.00081568	0.00881678	0.123789	0.00441422	0.0124596	0.0139307	0.000104622
1456293_s_at	CCNH	cyclin H	0.0229718	0.0102267	0.00803018	0.532073	0.0252603	0.00102302	0.00108117	0.0115288	0.0807599	0.00140553	0.0160801	0.777243	0.00314659	0.0292283	0.0283956	0.000840293
1456312_x_at	Gsn	gelsolin	0.00968293	0.000665005	0.000547254	0.0100883	0.00388777	0.00096227	0.00133177	0.00355695	0.0325305	0.00125875	0.00853837	0.0120022	0	0.0140216	0.0291213	0.00135368
1456319_at	X83313	EST X83313	0.0268093	0.00070563	0.00111779	0.0655197	0.0247191	0.00205175	0.00192228	0.00586113	0.0312605	0.000925146	0.015941	0.0514901	0.00834027	0.0605797	0.4992	0.0272242
1456341_a_at	KLF9	Kruppel-like factor 9	0.0791045	0.000792701	0.00329355	0.0307817	0.0183343	0.00322979	0.0343184	0.00434065	0.0115914	1.2026e-05	0.00985404	0.0151531	0.000770108	0.0392169	0.0329102	1.13124e-05
1456393_at	NCRNA00081	RIKEN cDNA 2310002J21 gene	0.881084	0.00504186	0.00721107	0.991735	0.0931462	0.00602865	0.00809815	0.981731	0.999872	0.00419597	0.978808	0.99901	0.00630179	0.999114	0.995976	0.00840445
1456424_s_at	Pltp	phospholipid transfer protein	0.0423248	0.000577839	0.000237419	0.042952	0.00512672	0.503087	0.0447024	0.00564191	0.0236681	0.00020212	0.00837514	0.461328	0.00740401	0.0189343	0.017487	8.91329e-05
1456438_x_at	RPN1	ribophorin I	0.0100787	0.000698086	0.000822463	0.0121118	0.00431261	1.05202e-05	0.000978456	0.00352072	0.00963024	0.000502415	0.00674807	0.010465	0.000929116	0.0198575	0.010018	0
1456462_x_at	LOC100044953	similar to protein phosphatase 1	0.0933204	0.0114159	0.00993759	0.0660268	0.0238603	0.000528719	0.00143652	0.00461265	0.101805	0.0014921	0.00857651	0.0924249	0.000970676	0.0148293	0.0646601	0.00113728
1456573_x_at	Nnt	nicotinamide nucleotide transhydrogenase	0.0317651	0.000840033	0.00197754	0.0188355	0.00855086	5.34188e-07	0.00160131	0.00363902	0.0225076	0.000906017	0.122823	0.0357921	0.00226442	0.0462496	0.0235592	2.41431e-05
1456617_a_at	Eif2s2	similar to Eif2s2 protein; eukaryotic translation initiation factor 2, subunit 2 (beta)	0.740434	0.003273	0.00594083	0.94887	0.377359	0.00640938	0.00643882	0.412269	0.999961	0.00338325	0.526359	0.998912	0.00584739	0.944486	0.99353	0.0106955
1456642_x_at	S100A10	S100 calcium binding protein A10 (calpactin)	0.0122428	0.00605561	0.0116522	0.146509	0.0533246	0.00240432	0.00233912	0.00410835	0.0172449	1.45528e-06	0.00708537	0.0190386	0.00384302	0.0131117	0.0129396	0.000474629
1456663_x_at	TM2D2	TM2 domain containing 2	0.0460149	6.50247e-05	2.28513e-06	0.0196183	0.0073327	0.00716911	0.0377864	0.00572031	0.0405204	0.000425285	0.0175943	0.142309	0.0153675	0.0565896	0.0424093	0.00079234
1460186_at	TM9SF3	transmembrane 9 superfamily member 3	0.988386	0.0051362	0.00635582	0.815324	0.596443	0.00168065	0.00698895	0.170524	1	0.00461512	0.41877	0.972177	0.0352821	0.999519	0.993916	0.0103493
1460189_at	dcaf11	WD repeat domain 23	0.0170355	0.00052525	0.000536629	0.0126803	0.00524964	0.00162849	0.0173362	0.00281227	0.00958859	0.00053898	0.00598289	0.0256762	0.00505584	0.013686	0.00961295	0.000509952
1460196_at	Gm5678	predicted gene 5678; carbonyl reductase 1	0.010775	0.00078646	8.75867e-05	0.02102	0.0102413	0.000607116	0.000988251	0.00352772	0.0177143	0.000460582	0.0133852	0.101197	0.0484947	0.00955166	0.0120729	0.000484812
1460197_a_at	STEAP4	STEAP family member 4	0.01017	3.2761e-05	0.00435146	0.0273571	0.00558832	0.000631839	0.00100895	0.00305866	0.0174332	1.2181e-05	0.0228254	0.0459619	0.00142759	0.0109879	0.0132948	0.00056678
1460212_at	GNAT1	guanine nucleotide binding protein, alpha transducing 1	0.0184447	0.000597348	0.000819217	0.0199266	0.012381	0.000726165	0	0.00482963	0.0164236	1.14661e-05	0.00985812	0.00992005	0.000751186	0.0110161	0.01064	0.00054736
1460232_s_at	Hsd3b2	hydroxy-delta-5-steroid dehydrogenase, 3 beta- and steroid delta-isomerase 2	0.0177966	0.00431917	0.00379216	0.0140552	0.00480559	0.00212467	0.00392305	0.00386457	0.0137085	0.000581514	0.0164727	0.0149468	0	0.00996692	0.0102067	0
1460241_a_at	st3gal5	ST3 beta-galactoside alpha-2,3-sialyltransferase 5	0.182341	0.00685922	0.238087	0.596632	0.0228541	0.000481997	0.000538727	0.00464443	0.029397	0.000552522	0.0123333	0.105622	0.00549168	0.157081	0.135241	0.000775824
1460256_at	CAR3	carbonic anhydrase 3	0.039443	0.0148747	0.00403694	0.130524	0.0208978	0.000562056	0.00014495	0.00664488	0.183452	0.000624609	0.0145625	0.4477	0.023009	0.0355706	0.0226896	0.000617045
1460303_at	NR3C1	nuclear receptor subfamily 3, group C, member 1	0.838157	0.0127404	0.00262666	0.947665	0.130036	0.00340438	0.0131324	0.851639	0.997575	0.00239722	0.953664	0.879469	0.133246	0.974058	0.487256	0.682474
1460323_at	Tars	threonyl-tRNA synthetase	0.0262489	0.000952875	0.000550117	0.00942594	0.00401337	0.000661506	0.0043438	0.00286419	0.0127168	0	0.00636592	0.0140909	0.0008641	0.00983635	0.0327786	0.00108096
1460351_at	Gm7665	predicted gene 7665; S100 calcium binding protein A11 (calgizzarin); predicted gene 5068	0.0822915	0.0200213	0.00224577	0.0291125	0.00685869	0.0296822	0.134721	0.0029197	0.0118085	0.00043907	0.00779173	0.0138254	0.000941207	0.0371599	0.0119545	0
1460401_at	edem3	ER degradation enhancer, mannosidase alpha-like 3	0.582863	0.000488183	0.000138618	0.104991	0.230454	0.000182761	0.00245519	0.0206068	0.482745	0.000395127	0.0463003	0.778593	0.00846545	0.120843	0.52926	0.0477988
1460430_at	LOC100047558	similar to RAP2C, member of RAS oncogene family; RAP2C, member of RAS oncogene family	0.333473	0.000728662	0.000450731	0.826107	0.272238	0.000930276	0.0013491	0.124003	0.876986	0.000352464	0.0794094	0.850533	0.0048161	0.404795	0.567887	0.0115451
1460455_at	UBR3	ubiquitin protein ligase E3 component n-recognin 3	0.996658	0.0105864	0.00617269	0.880215	0.514454	0.00721543	0.00669573	0.308369	0.998211	0.00201202	0.938131	0.999994	0.00726488	0.983056	0.940836	0.0831848
1460464_at	2700089E24Rik	RIKEN cDNA 2700089E24 gene	0.707064	0.0141506	0.00228879	0.918439	0.488541	0.00246458	0.00847517	0.165401	0.997874	0.00304562	0.547386	0.998315	0.00541437	0.994576	0.993851	0.0084743
1460547_a_at	Gm7964	heterogeneous nuclear ribonucleoprotein K; predicted gene 7964	0.0433392	0.00203192	0.00134059	0.0556976	0.0128742	0.000495887	0.000766838	0.00416678	0.0195751	0.000374896	0.00890895	0.321102	0.00454512	0.0169222	0.076922	0.00250975
1460561_x_at	SEPW1	selenoprotein W, muscle 1	0.0247045	0.000817364	0.000360343	0.0213205	0.00834888	0.00196796	0.00359027	0.00380541	0.12997	0.000970528	0.0365272	0.0228285	0.00121401	0.101161	0.155831	0.00358879
1460569_x_at	CLDN3	claudin 3	0.0303582	0.0060769	0.00124178	0.0202529	0.00704537	0.00248698	0.00243494	0.0167983	0.0330878	5.42438e-05	0.0115454	0.0158607	0.00278902	0.0270468	0.365333	0.00554902
1460639_a_at	atox1	ATX1 (antioxidant protein 1) homolog 1 (yeast)	0.0329925	0.0132964	0.00242773	0.0532855	0.0144856	0.00162199	0.00239077	0.00658684	0.0172915	0.000887735	0.0130141	0.0241982	0.00184602	0.0217198	0.0217564	0
1460647_a_at	NR2F6	nuclear receptor subfamily 2, group F, member 6	0.0699002	0.00151001	0.00628855	0.456068	0.570999	0.000531728	0.000987156	0.0100061	0.650772	0.00357811	0.0324844	0.334066	0.238158	0.0782931	0.375281	0.00374306
1460682_s_at	Ceacam2	carcinoembryonic antigen-related cell adhesion molecule 1; carcinoembryonic antigen-related cell adhesion molecule 2	0.996846	0.013311	0.0258095	0.987329	0.0998822	0.024908	0.0606646	0.999872	0.999948	0.0107717	0.994728	0.753793	0.00746201	0.999993	0.9998	0.00480036
1460707_at	Gm13422	predicted gene 13422; protein tyrosine phosphatase 4a2	0.927752	0.00343972	0.00126067	0.905879	0.0592762	0.00395629	0.0125089	0.394108	0.986053	0.0219226	0.840687	0.87419	0.0383602	0.706787	0.978087	0.0223106
AFFX-18SRNAMur/X00686_3_at	Rn18s	18S RNA	0.0489121	0.00192293	0.00160575	0.047681	0.00896288	0.00407105	0.00244923	0.00807429	0.0166906	0.000318431	0.00946619	0.516842	0.00211277	0.015943	0.0145091	0.000346719
AFFX-18SRNAMur/X00686_5_at	Rn18s	18S RNA	0.0281753	0.00216737	0.00187441	0.0375548	0.00354378	0.00501119	0.00353141	0.00544267	0.0152855	0.000470106	0.00899023	0.348688	0.00102458	0.016594	0.0136378	0.000480807
AFFX-18SRNAMur/X00686_M_at	Rn18s	18S RNA	0.0222686	0.000777654	0.000730582	0.0129985	0.00519188	0.00154668	0.00225752	0.0119228	0.0218861	0.000546474	0.00919372	0.234341	9.80511e-06	0.0166419	0.011288	3.43248e-10
AFFX-MURINE_b1_at	BC1	brain cytoplasmic RNA 1	0.0144503	0.00072089	0.000906673	0.0547001	0.185468	0.00730682	0.00207762	0.00385019	0.0325767	0.000888205	0.0207996	0.0122372	0.00201804	0.0143658	0.0130984	3.56494e-12
AFFX-PyruCarbMur/L09192_MB_at	Pcx	pyruvate carboxylase	0.0146557	0.00114583	0.00736627	0.0417084	0.0118355	0.000981981	0.000968555	0.00294849	0.0221004	0.00132946	0.0089881	0.0247398	0.0016946	0.0290405	0.0112335	0.000593746
AFFX-r2-Ec-bioB-M_at	bioB	Biotin synthase	0.00998032	0.000537113	5.34817e-08	0.00975389	0.00636785	0	0.00147189	0.00444406	0.0115701	0.000486026	0.00755688	0.0103576	0	0.0120702	0.0101548	0.000536025
1415692_s_at	Canx	calnexin	0.812632	0.00209489	0.00128951	0.0401756	0.0131469	0.000816517	0.00184936	0.00600653	0.068807	0.00414138	0.0277418	0.396596	0.026713	0.0359221	0.0530128	0.000842908
1415712_at	CTBP2	C-terminal binding protein 2	0.404631	0.00737037	0.00417618	0.800669	0.0381441	0.0166665	0.0105545	0.25958	0.975642	0.0276418	0.937448	0.893635	0.0785779	0.957677	0.979679	0.0204529
1415723_at	LOC100047658	similar to Eukaryotic translation initiation factor 5; eukaryotic translation initiation factor 5	0.427326	0.000755932	0.000969982	0.150571	0.0313164	0.00507409	0.00526857	0.0417461	0.362838	0.000824479	0.353795	0.944192	0.0084855	0.820869	0.948085	0.0493954
1415724_a_at	Cdc42	cell division cycle 42 homolog (S. cerevisiae); predicted gene 7407	0.0455789	0.000331337	0.000387252	0.03932	0.00781097	0.00312481	0.00294766	0.00385046	0.0292528	0.00035793	0.00815541	0.398612	0.0290403	0.0159649	0.0195906	0.000456321
1415760_s_at	atox1	ATX1 (antioxidant protein 1) homolog 1 (yeast)	0.0366256	0.00535979	0.0136425	0.4839	0.154708	0.00643631	0.00469435	0.00588748	0.210094	0.0236468	0.274795	0.0295083	0.000129084	0.0289935	0.0452867	7.33109e-07
1428178_s_at	TRAPPC6B	trafficking protein particle complex 6B	0.968889	0.00649586	0.00522688	0.827469	0.180461	0.00367535	0.0101273	0.0380658	0.927038	0.0298183	0.871075	0.917917	0.11584	0.987587	0.983887	0.0169542
1428210_s_at	CHUK	conserved helix-loop-helix ubiquitous kinase	0.735171	3.40806e-05	0.000152877	0.0400098	0.0309001	0.000902834	0.00138922	0.011694	0.0519325	0.00455772	0.0326469	0.692936	0.0213375	0.0300266	0.0877606	0.00231567
1428223_at	mfsd2a	major facilitator superfamily domain containing 2	0.0148092	0.00047882	0.000357862	0.015038	0.0344407	0.000976364	0.00250962	0.00813609	0.169237	0.0436438	0.345276	0.0148514	0.000384258	0.0169521	0.0156259	0.000316473
1428236_at	acbd5	acyl-Coenzyme A binding domain containing 5	0.250067	0.00287781	0.00040998	0.0436839	0.0205268	0.00141946	0.00130514	0.00838217	0.0605783	6.82492e-06	0.0489111	0.872216	0.00827197	0.0532854	0.412671	0.0197136
1428252_at	Chmp2b	chromatin modifying protein 2B	0.244354	0.000438249	0.000116899	0.0494167	0.027947	0.00113616	0.00160887	0.00590656	0.0915554	0.000778136	0.0299055	0.82796	0.0065471	0.0477727	0.31288	0.00838466
1428393_at	NRN1	neuritin 1	0.125444	0.0121905	0.000612628	0.0246466	0.0107632	0.00146022	0.00147684	0.00525768	0.0181731	0.000906473	0.0334009	0.0560405	0.0101324	0.482554	0.0582705	0.00177879
1428409_at	naa50	N-acetyltransferase 13	0.907375	0.0207993	0.00658969	0.781989	0.307408	0.00595215	0.0065335	0.123689	0.992087	0.00824734	0.947665	0.988537	0.0255842	0.954325	0.91825	0.0991115
1428410_at	naa50	N-acetyltransferase 13	0.120429	0.0970349	0.008	0.392191	0.212976	0.00182981	0.000108406	0.00679395	0.108171	0.000216105	0.116589	0.88896	0.01141	0.125883	0.435885	0.0181008
1428433_at	HIPK2	homeodomain interacting protein kinase 2	0.223815	0.000744854	0.000469044	0.0159124	0.0114782	0.000885863	0.00166036	0.00523055	0.0455949	0.000427529	0.0238835	0.297219	0.0218412	0.0171899	0.0240891	0.000187907
1428463_a_at	PPP2R5E	protein phosphatase 2, regulatory subunit B (B56), epsilon isoform	0.0108001	0.000524734	0.000538541	0.0141031	0.0256849	2.78181e-07	0.00116854	0.00413967	0.0261351	0.00144197	0.0120384	0.0100017	0.000873374	0.0199701	0.0132911	0.000721367
1428471_at	SORBS1	sorbin and SH3 domain containing 1	0.022933	0.0007516	3.28278e-06	0.0139198	0.00534951	0.00633647	0.0031128	0.00562421	0.0168272	0.00116351	0.0443003	0.540929	0.0721519	0.015056	0.0161698	0.000486494
1428473_at	PPP3CB	protein phosphatase 3, catalytic subunit, beta isoform	0.906326	0.00309598	0.0019836	0.878573	0.189003	0.00363307	0.00579917	0.177628	0.996942	0.00903008	0.983851	0.684031	0.440846	0.990382	0.945773	0.0687424
1428484_at	OSBPL3	oxysterol binding protein-like 3	0.0494875	0.00040719	0.000278288	0.0157756	0.00473239	0.274048	0.140066	0.00457903	0.0173169	0.000615827	0.00854082	0.3892	0.0438998	0.0174433	0.0174532	0.00033689
1428487_s_at	Gm4899	hypothetical protein LOC675736; coenzyme Q10 homolog B (S. cerevisiae); predicted gene 4899	0.00995415	0.00119036	0.000957608	0.0193132	0.00388036	0.000643541	0.00100645	0.00291705	0.0110723	0.00181576	0.024346	0.0361953	0.00932008	0.0216074	0.0117736	0.000741776
1428516_a_at	Alkbh7	alkB, alkylation repair homolog 7 (E. coli)	0.0109084	0.000121279	0.00510364	0.0438647	0.0885097	0.000765046	0.00117362	0.000170385	0.0385585	0.000903086	0.0493148	0.0115034	0.0017932	0.0383762	0.0225776	2.37142e-09
1428547_at	NT5E	5' nucleotidase, ecto	0.158552	0.00407506	0.00135948	0.0180451	0.00548608	0.00125529	0.00117128	0.00311496	0.0112624	0.000649948	0.0356738	0.0151071	0.000745433	0.0419864	0.0133619	2.41976e-05
1428562_at	1428562_at	--	0.0264583	0.000125512	3.55102e-05	0.0150488	0.00555707	0.023333	0.02689	0.00268981	0.015695	1.31475e-06	0.0631845	0.0132751	0.00101163	0.0669733	0.232587	0.0133677
1428603_at	Gm16039	predicted gene 16039	0.0935446	0.0017783	0.00101642	0.023172	0.0051079	1.23772e-09	0.00186034	0.00731533	0.0277879	0.00110755	0.0751937	0.823568	0.00922718	0.0192788	0.0668774	0.0012871
1428622_at	Depdc6	DEP domain containing 6	0.152245	0.000211711	3.21879e-05	0.0844078	0.0297439	0.000505531	0.00373659	0.0112393	0.14971	0.00435198	0.129998	0.697254	0.019481	0.168673	0.535162	0.0189313
1428624_at	2810482I07Rik	RIKEN cDNA 2810482I07 gene	0.999861	0.00336039	0.00394801	0.843004	0.271546	0.00295819	0.00813469	0.544837	0.993235	0.0675371	0.926196	0.827332	0.27122	0.98305	0.966707	0.03815
1428637_at	LOC100044376	similar to Dual-specificity tyrosine-(Y)-phosphorylation regulated kinase 2	0.586025	0.000939976	0.000964018	0.176211	0.0403292	4.42345e-05	0.0035072	0.0613149	0.382842	0.00118511	0.348862	0.935472	0.0155728	0.271279	0.516645	0.00353646
1428660_s_at	LOC100047963	similar to ADIR1	0.0109884	0.000552031	1.78868e-05	0.038788	0.0188012	2.58828e-05	0.00317685	0.00665374	0.0350192	5.04702e-06	0.00830308	0.0206126	0.000790575	0.0530973	0.0306742	0.00110745
1428663_at	sgms2	sphingomyelin synthase 2	0.122054	0.00090258	0.000678548	0.0167303	0.00698805	0.00112283	0.00174928	0.00391383	0.0411582	0.000483681	0.024321	0.08561	0.00280388	0.0175284	0.016856	6.33692e-05
1428692_at	Hddc3	HD domain containing 3	0.0310572	0.00599046	0.0036255	0.0371337	0.0603217	0.0102164	0.00314818	0.168086	0.916307	0.00531762	0.046191	0.0362975	0.00133124	0.0534423	0.0734431	0.00214325
1428715_at	GFPT1	glutamine fructose-6-phosphate transaminase 1	0.0607905	0.00429125	0.000592856	0.0204706	0.0064596	0.00158275	0.00116275	0.00909099	0.0184938	0.000565434	0.00936746	0.613647	0.00684042	0.0241515	0.105787	0.00301686
1428738_a_at	Gm10395	predicted gene 10395; predicted gene 9746; DNA segment, Chr 14, ERATO Doi 449, expressed	0.234608	0.000848315	0.000900401	0.0439804	0.0296317	0.00132378	0.00187658	0.0184101	0.0608212	0.00119835	0.0557374	0.0779137	0.00137368	0.859003	0.0699554	0.00789425
1428748_at	Zfp826	zinc finger protein 826	0.0225503	0.00447673	0.000414621	0.449017	0.0996423	0.000729268	0.00140263	0.00972367	0.13192	0.00700997	0.0270922	0.650615	0.0342766	0.0235064	0.0194335	2.60596e-05
1428832_at	1600002H07Rik	RIKEN cDNA 1600002H07 gene	0.0628573	0.000290571	0.000137171	0.0608946	0.0251477	0.0127537	0.0156632	0.0126776	0.331566	0.0343603	0.57243	0.316559	0.00118736	0.0347506	0.0407785	0.000301639
1428883_at	tmem57	transmembrane protein 57	0.0769301	0.00334277	0.0014653	0.0495332	0.00613524	0.000290208	0.000857556	0.00682132	0.0236142	0.00108261	0.0213679	0.332901	0.0123273	0.0176354	0.0238057	4.59073e-05
1428909_at	A130040M12Rik	RIKEN cDNA A130040M12 gene	0.0288293	0.000214647	0.000409724	0.0150196	0.0104633	1.92766e-05	9.20831e-05	0.0041543	0.0195523	0.00661226	0.097845	0.310861	0.0273091	0.0241325	0.141229	0.00446261
1428923_at	PPP1R3G	protein phosphatase 1, regulatory (inhibitor) subunit 3G	0.013159	0.000254128	0	0.0207405	0.0336004	0.00168628	0	0.39599	0.0333242	0.000517527	0.0176622	0.063109	0.00115771	0.0148536	0.0246509	0.000967703
1428981_at	2810007J24Rik	RIKEN cDNA 2810007J24 gene	0.0528897	0	0.000465144	0.0133486	0.0158013	0.0153624	0.0152521	0.00376328	0.0128497	0.00086684	0.0223108	0.163572	0.0127134	0.0817319	0.020038	0.000548252
1429019_s_at	PON2	paraoxonase 2	0.862887	0.000241933	0.00174579	0.103156	0.0205525	0.00815182	0.0039614	0.0211329	0.924944	0.000137312	0.931186	0.968629	0.00972466	0.737808	0.944608	0.0278379
1429145_at	NHLRC2	NHL repeat containing 2	0.00965559	0.00152061	0.00280553	0.0255871	0.0260723	0.00103641	0.00212745	0.00312036	0.0245437	0.00233683	0.0108691	0.0197662	0.00287412	0.0561117	0.0211624	0.00102937
1429184_at	Gm4070	predicted gene 4070	0.0153338	0.00411467	0.00115847	0.0154896	0.00677872	0.0020496	0.0106777	0.000593679	0.0952141	0.00560743	0.0261579	0.475298	0.00257485	0.0215921	0.0282074	0.000466956
1429203_at	2410076I21Rik	RIKEN cDNA 2410076I21 gene	0.00991979	0.000639171	0.000691437	0.0543707	0.0339766	0.000798464	0.0010136	0.00345015	0.0113408	0.000467957	0.0105439	0.0117716	5.74472e-08	0.0390688	0.0243819	0.00257883
1429206_at	Rhobtb1	Rho-related BTB domain containing 1	0.0281163	5.17981e-05	0	0.0125348	0.00427998	0	0.0020167	0.00284511	0.0129883	0.00135485	0.00861335	0.0422232	0.0022521	0.0218138	0.00945545	0.000535688
1429254_at	aqp11	aquaporin 11	0.076392	0.000900127	8.49571e-08	0.0214129	0.0300008	0.00106613	0.00200238	0.000603101	0.0369158	0.00136096	0.0222991	0.0307465	0.0014222	0.0231949	0.0263224	0.00110673
1429273_at	BMPER	BMP-binding endothelial regulator	0.0113141	0.000517594	0.0012392	0.0218922	0.00476927	0.000838774	0.00102678	0.00418559	0.012307	3.29497e-05	0.00821446	0.0126136	0.00140914	0.0725216	0.0423352	0.00157611
1429298_at	DDAH1	dimethylarginine dimethylaminohydrolase 1	0.380891	0.00611552	0.000255504	0.0141382	0.00801948	0.000744259	0.00107335	0.00549555	0.0232324	0.000949857	0.0941314	0.0409576	0.00112289	0.342792	0.0355207	0
1429351_at	KLHL24	kelch-like 24 (Drosophila)	0.0815781	0.00253433	0.0034079	0.097508	0.0928484	0.000738869	0.000126176	0.00394852	0.0494939	5.66277e-05	0.00949783	0.229943	0.00892823	0.0219981	0.148183	0.003819
1429383_at	LOC100047516	casein kinase 1, gamma 3; similar to casein kinase 1, gamma 3	0.0475572	0.00162157	0.000530845	0.0418455	0.00585574	0.00139953	0.0057257	0.00482813	0.0192435	0.000446417	0.0259973	0.511635	0.00955462	0.0181854	0.0165828	0.000327373
1429384_at	LOC100047516	casein kinase 1, gamma 3; similar to casein kinase 1, gamma 3	0.0784356	0.00260632	0.00215574	0.111435	0.0327112	0.000571161	0.000794749	0.010126	0.0564884	0.00203228	0.0322009	0.466356	0.0141755	0.0302321	0.10478	0.00102003
1429399_at	RNF125	ring finger protein 125	0.0119957	0.000480806	0.000945911	0.0146214	0.00472268	0.000972692	0.0018983	0.000898024	0.0170563	0	0.00786665	0.0700031	0.00156729	0.0708911	0.201505	0.0134398
1429429_s_at	PCMTD1	protein-L-isoaspartate (D-aspartate) O-methyltransferase domain containing 1	0.828988	0.00473469	0.00729215	0.70638	0.115385	0.000530577	0.00150733	0.0579512	0.451294	0.000804378	0.354214	0.994248	0.00642802	0.511003	0.602667	0.00914286
1429433_at	Bat2l2	BAT2 domain containing 1; predicted gene 4972	0.0234267	0.00684114	0.00710255	0.596928	0.0274212	1.55193e-06	0.00690395	0.00644682	0.0374896	0.000510749	0.0159353	0.805532	0.0187698	0.101977	0.0278624	0.000802279
1429519_at	FPGT	fucose-1-phosphate guanylyltransferase	0.927348	0.00259268	0.00590955	0.689193	0.516274	0.00540053	0.0101573	0.407215	0.999987	0.00387262	0.992137	0.99871	0.00718398	0.996797	0.900136	0.12897
1429523_a_at	SLC39A5	solute carrier family 39 (metal ion transporter), member 5	0.0190315	0.00226751	0.000964385	0.0119398	0.00546701	0.004444	0.00461807	0.00311407	0.0123042	0.000558705	0.0123376	0.0105868	0.000756102	0.0582707	0.0127227	0
1429639_at	GPCPD1	preimplantation protein 4	0.0272823	0.000130944	0.000787787	0.0143515	0.00570161	8.84027e-05	0.00261393	0.00359953	0.0186368	0.00285705	0.0300008	0.0382703	0.00214253	0.0252248	0.0271819	0.000767438
1429642_at	Anubl1	AN1, ubiquitin-like, homolog (Xenopus laevis)	0.104198	0.00010379	9.92818e-05	0.0183985	0.00499461	0.000623832	0.000439962	0.00880736	0.0190851	0.000416776	0.0267059	0.200799	0.00823185	0.153656	0.463769	0.00677995
1429648_at	SLC35A3	solute carrier family 35 (UDP-N-acetylglucosamine (UDP-GlcNAc) transporter), member 3	0.473769	0.00104712	0.00273426	0.41482	0.0822482	0.000403147	0.00192784	0.0157514	0.174002	0.00964492	0.0833204	0.894498	0.102658	0.254955	0.811186	0.013765
1429649_at	SLC35A3	solute carrier family 35 (UDP-N-acetylglucosamine (UDP-GlcNAc) transporter), member 3	0.360729	0.000983093	0.00386415	0.702708	0.197748	0.000365228	0.000625168	0.0179353	0.942916	0.00854206	0.285901	0.913821	0.0969987	0.841702	0.885399	0.00347367
1429712_at	1429712_at	--	0.0472647	0.00105542	0.000707507	0.0174267	0.00969355	0.00049794	0.00201996	0.00375035	0.0156892	0.000280553	0.0110107	0.0295576	0.00100035	0.0326101	0.443252	0.0117242
1429771_at	3110073H01Rik	RIKEN cDNA 3110073H01 gene	0.254714	0.00126905	0.000936625	0.0339372	0.0245504	0.000258062	0.00125367	0.00525304	0.0349671	1.48433e-05	0.027874	0.738755	0.0521439	0.0338139	0.207371	0.00832914
1429784_at	LOC100044924	mitogen-activated protein kinase 1 interacting protein 1-like; hypothetical protein LOC100044924	0.113682	0.00050881	0.00406592	0.543876	0.0465631	0.000219896	0.00150297	0.00612394	0.0319607	4.60644e-08	0.0129894	0.1083	0.00150686	0.046428	0.0327757	0.000429374
1429822_at	4633401B06Rik	RIKEN cDNA 4633401B06 gene	0.0417969	0.000412553	0.000841445	0.0151011	0.00536753	0.000723443	0.0009476	0.0033732	0.0147202	0.00100582	0.0604421	0.229772	0.0123279	0.0146055	0.0124593	0
1430133_at	TBC1D8B	TBC1 domain family, member 8B	0.408347	0.00138641	0.00363978	0.219051	0.760884	0.00399922	0.000324308	0.0134286	0.206764	0.000389375	0.123468	0.98521	0.0148434	0.210502	0.908171	0.0325284
1430520_at	CPNE8	copine VIII	0.0133081	0.0113164	0.0111596	0.0178523	0.00656381	0.00137819	0.0012884	0.00354818	0.0183448	0.00079802	0.00720304	0.0123172	0.000831287	0.0130816	0.0130694	0.00067331
1430584_s_at	CAR3	carbonic anhydrase 3	0.0231512	0.0747209	0.0125611	0.334693	0.030664	0.00168799	0.00180611	0.00567316	0.0278831	0.00134441	0.0187053	0.897688	0.0261258	0.0231646	0.0230208	6.81066e-08
1430893_at	Mup14	predicted gene 12809; predicted gene 2068; predicted gene 12549; predicted gene 13514; major urinary protein 2; predicted gene 13513; major urinary protein 1; predicted gene 12561; predicted gene 12546; novel member of the major urinary protein (Mup) gene family; predicted gene 2024; predicted gene 12557; predicted gene 14076; predicted gene 12552; major urinary protein LOC100048885; predicted ge…	0.0525594	0.000757986	0.002892	0.128738	0.301217	0.00358176	0.381595	0.00436569	0.0204725	9.95983e-14	0.0093394	0.0169433	0.000585828	0.0343086	0.0166192	0
1430896_s_at	NUDT7	nudix (nucleoside diphosphate linked moiety X)-type motif 7	0.0101062	0.00155182	0.0037574	0.0363716	0.00396611	0.00203928	0.00485276	0.00410464	0.00983204	0.000542516	0.0116962	0.0291863	0.00776691	0.00933481	0.0109029	0.000511482
1430991_at	1810014B01Rik	RIKEN cDNA 1810014B01 gene	0.0314788	0.00112566	0.00736627	0.563547	0.0203826	0.000484858	0.00384589	0.0689333	0.474794	8.44341e-05	0.0312983	0.717565	0.00897315	0.459574	0.415264	0.0048317
1430996_at	etnk1	ethanolamine kinase 1	0.12136	0.00295839	0.00587282	0.548306	0.0146072	0.00126946	2.04805e-05	0.0107229	0.0220365	0.000346902	0.0109608	0.294048	0.0522079	0.0194236	0.0449615	0.00449194
1431406_at	AGXT2L1	alanine-glyoxylate aminotransferase 2-like 1	0.00960705	0.000562101	0.000968311	0.0142456	0.00476925	0.00254166	0.00139489	0.00306304	0.0100175	0	0.00726659	0.0168337	0.00176548	0.0311756	0.0208115	3.79361e-05
1431916_at	Hsd3b3	hydroxy-delta-5-steroid dehydrogenase, 3 beta- and steroid delta-isomerase 3	0.0863005	0.168044	0.0122648	0.789018	0.0151162	0.000385197	0.00216116	0.00864673	0.0495228	0.00158911	0.0267624	0.986057	0.00752124	0.0336371	0.0403764	0.00147822
1433453_a_at	ABTB2	ankyrin repeat and BTB (POZ) domain containing 2	0.0132863	0.00502884	0.0083201	0.0931754	0.0514522	0.00199423	7.14582e-06	0.00330015	0.0177962	0.000648989	0.0130883	0.307945	0.0174241	0.0114759	0.0130917	0.000203444
1433537_at	Atrx	alpha thalassemia/mental retardation syndrome X-linked homolog (human)	0.155083	0.00190826	0.00143365	0.117421	0.0229194	0.00244974	0.000364744	0.0069848	0.0479997	3.03925e-07	0.0259001	0.991398	0.0059995	0.058649	0.222814	0.00747986
1433634_at	IRF2BP2	interferon regulatory factor 2 binding protein 2	0.0119839	0.000621056	0.000696215	0.0268145	0.0710916	0.00179801	0.00127496	0.00413218	0.020174	0	0.0116026	0.0114215	0	0.0426877	0.0157232	0.000263346
1433648_at	Spag9	sperm associated antigen 9	0.0837921	0.00185796	0.000782357	0.215921	0.0434946	0.000217987	0.00196527	0.00595886	0.0814509	0.00179707	0.0796911	0.965021	0.0137372	0.024466	0.0328822	0.00110165
1433694_at	LOC100047223	similar to phosphodiesterase 3B; phosphodiesterase 3B, cGMP-inhibited	0.190448	0.0035885	0.000875574	0.0382571	0.0122723	0.00672977	0.00295096	0.0019096	0.0332497	0.000507522	0.0197292	0.491204	0.00837874	0.022934	0.137446	0.00544721
1433735_a_at	TMEM64	transmembrane protein 64	0.332844	3.90101e-05	3.5261e-05	0.0191195	0.00190287	0.000595605	0.00123299	0.00571998	0.14876	0.00125433	0.113504	0.175563	0.00699898	0.0189206	0.0229984	6.36301e-06
1433754_at	mbnl2	muscleblind-like 2	0.923466	0.0143455	0.00323445	0.665061	0.374497	0.000284694	0.00127919	0.455979	0.990162	0.275813	0.522228	0.987299	0.0243329	0.811173	0.833383	0.146591
1433771_at	Fam108b	family with sequence similarity 108, member B	0.907016	0.0007639	0.000781355	0.278393	0.0729263	0.002338	0.0034481	0.0458982	0.998718	0.00309566	0.995854	0.554279	0.523718	0.898525	0.93987	0.0684283
1433772_at	hspa13	heat shock protein 70 family, member 13	0.567172	0.00169106	0.00295139	0.163361	0.142516	5.18526e-07	0.000360333	0.00740792	0.0466861	0.000605341	0.0205228	0.973717	0.0200073	0.0624485	0.341611	0.00667075
1433789_at	Snhg3	small nucleolar RNA host gene (non-protein coding) 3	0.021716	0.000925773	3.14224e-06	0.0393847	0.933978	0.00619709	0.00289491	0.00938355	0.248836	0.00230778	0.0187609	0.0984724	0.00168693	0.129971	0.0289292	0.000236089
1433836_a_at	8430408G22Rik	RIKEN cDNA 8430408G22 gene	0.0848805	0.00617539	0.0913941	0.385661	0.0185301	0.00479793	0.000764457	0.00350151	0.0295246	0.00102438	0.083347	0.0343117	0.00103098	0.0167253	0.0162203	0.000298158
1433837_at	8430408G22Rik	RIKEN cDNA 8430408G22 gene	0.04761	0.00303111	0.0199248	0.151337	0.0158711	0.00629471	0.00135402	0.00397711	0.0285441	0.000320298	0.07149	0.0320355	0.00371479	0.0144291	0.0270827	9.38369e-05
1433879_a_at	LOC100044924	mitogen-activated protein kinase 1 interacting protein 1-like; hypothetical protein LOC100044924	0.277669	0.000592358	0.000379962	0.0206586	0.00299836	0.000404883	0.00123726	0.00677742	0.0331939	0.000697697	0.037488	0.409877	0.0104987	0.0175334	0.0235294	0.000419322
1433885_at	IQGAP2	IQ motif containing GTPase activating protein 2	0.87608	0.00202128	0.000209108	0.68025	0.342174	0.00183931	0.00729872	0.0902666	0.768328	0.0736027	0.763704	0.974148	0.0317295	0.750494	0.937272	0.00930426
1433897_at	AI597468	expressed sequence AI597468	0.0829131	0.00084679	0.00108444	0.0461526	0.0326591	0.000166888	0.00229362	0.00554777	0.0421803	0.000926803	0.0150149	0.980123	0.0118998	0.0333577	0.139226	0.00614222
1433898_at	SLC25A30	solute carrier family 25, member 30	0.0124979	0.000967934	0.00047675	0.0104781	0.00501455	0.00361583	0.00284961	0.00292362	0.0102025	0.000465704	0.0133913	0.104951	0.00293843	0.0136574	0.0191197	0.000741376
1433934_at	Sec24a	Sec24 related gene family, member A (S. cerevisiae)	0.953565	0.00369441	0.0083512	0.97178	0.0715389	0.00383262	0.00792511	0.111396	0.975865	0.0194834	0.936248	0.991019	0.0167745	0.986409	0.983161	0.0220169
1433968_a_at	MEGF9	multiple EGF-like-domains 9	0.747665	0.00997055	0.00568862	0.651542	0.11801	0.00130297	0.00208466	0.0204018	0.407841	0.00235858	0.369883	0.955727	0.0545085	0.43857	0.573896	0.0358914
1433976_at	REEP3	receptor accessory protein 3	0.958751	0.0036285	0.00492748	0.897048	0.294339	0.00499909	0.0070452	0.522826	0.987769	0.00926112	0.921776	0.965854	0.0332108	0.895861	0.964703	0.0311603
1434075_at	BC030336	cDNA sequence BC030336	0.84839	0.00465074	0.00400142	0.29336	0.0500182	0.00303477	0.00564571	0.053174	0.967313	0.0365159	0.898168	0.57798	0.363254	0.948281	0.96232	0.0169315
1434096_at	SLC4A4	solute carrier family 4 (anion exchanger), member 4	0.179878	0.000558832	0.000977856	0.0561762	0.00931993	0.00161419	0.000968135	0.00361912	0.0203822	0	0.0107412	0.32154	0.0647001	0.01723	0.0519403	0.00110001
1434110_x_at	Mup14	predicted gene 12809; predicted gene 2068; predicted gene 12549; predicted gene 13514; major urinary protein 2; predicted gene 13513; major urinary protein 1; predicted gene 12561; predicted gene 12546; novel member of the major urinary protein (Mup) gene family; predicted gene 2024; predicted gene 12557; predicted gene 14076; predicted gene 12552; major urinary protein LOC100048885; predicted ge…	0.0313444	0.00131784	5.33243e-05	0.021825	0.0122141	0.0220304	0.0955439	0.00315766	0.0129499	0.000478329	0.00811566	0.0212333	0.00169634	0.0100499	0.0112017	1.94756e-08
1434171_at	Zfp874	zinc finger protein 874	0.104899	0.0010918	0.00099687	0.0196836	0.00657018	0.00455959	0.00322693	0.0081685	0.0495605	1	0.0202929	0.0214891	0.00142915	0.0233889	0.0492013	0.00126367
1434174_at	lysmd3	LysM, putative peptidoglycan-binding, domain containing 3	0.856644	0.00192599	0.00497264	0.261457	0.170113	0.000432695	0.00102949	0.0181162	0.701536	0.00161073	0.141176	0.974557	0.0134932	0.59933	0.926654	0.0335296
1434185_at	ACACA	predicted gene 5182; acetyl-Coenzyme A carboxylase alpha	0.0102254	4.54078e-07	0.000582856	0.0110774	0.00417324	0.0151519	0.0063458	0.00344546	0.02063	0.000912636	0.105506	0.0821005	0.00171479	0.0112416	0.0118541	0.000536225
1434188_at	SLC16A12	solute carrier family 16 (monocarboxylic acid transporters), member 12	0.960164	0.0331816	0.00312507	0.977386	0.0434907	0.00381237	0.00698317	0.0387091	0.999169	0.0231585	0.994139	0.958951	0.0456157	0.96173	0.961441	0.0420285
1434191_at	Tmem195	transmembrane protein 195	0.212755	0.00169211	0.000540058	0.0235293	0.00897077	0.0010026	0.00085225	0.00381197	0.0158233	0.000837813	0.029341	0.279111	0.0215178	0.0633383	0.0208383	8.90993e-05
1434232_a_at	2610030H06Rik	similar to RIKEN cDNA 2610030H06 gene; RIKEN cDNA 2610030H06 gene	0.0763728	0.000195197	0.000811533	0.0277646	0.0367842	0.000907811	0.000490452	0.00515668	0.0454982	7.0269e-10	0.022807	0.159695	0.00406864	0.0242043	0.0884303	0.00313525
1434301_at	FAM84B	RIKEN cDNA D330050I23 gene	0.0478161	0.000622719	0.000404182	0.0167502	0.00464335	0.00258187	0.00120826	0.00414297	0.012281	0.000731988	0.0463381	0.321084	0.00389744	0.0537239	0.0192417	0.000314201
1434302_at	Raph1	Ras association (RalGDS/AF-6) and pleckstrin homology domains 1	0.160953	0.00156035	0.00501479	0.147608	0.0105033	0.00323867	0.00245826	0.00551537	0.0419984	0.000804716	0.0333605	0.949806	0.0186059	0.0363954	0.0408291	0.00025526
1434310_at	bmpr2	bone morphogenic protein receptor, type II (serine/threonine kinase)	0.974231	0.00347621	0.00499067	0.965932	0.0869428	0.00501259	0.00808685	0.17639	1	0.0130564	0.990219	0.98873	0.0626621	0.997884	0.952375	0.068801
1434354_at	MAOB	monoamine oxidase B	0.258418	0.00103668	2.41241e-08	0.0219403	0.00903094	0.000284262	0.00449328	0.00546367	0.0216884	0.00208731	0.159139	0.0195379	0.000813886	0.0951512	0.0419763	0.000493899
1434371_x_at	Usp7	ubiquitin specific peptidase 7	0.232596	0.000869099	0	0.021321	0.00660809	9.10173e-16	0.00120719	0.00469639	0.0828185	3.57079e-05	0.0107777	0.261933	0.026484	0.058847	0.056028	0.00063477
1434376_at	CD44	CD44 antigen	0.0202414	0.000487059	0.000284604	0.022725	0.0754679	0.00127384	0.0563983	0.00268653	0.0152222	0.000375882	0.0122439	0.546831	0.0317275	0.015701	0.017485	0.000503306
1434389_at	SOS1	son of sevenless homolog 1 (Drosophila)	0.969949	0.00333653	0.00213631	0.548878	0.185102	0.0263853	0.0632926	0.0834946	0.999961	0.000966285	0.999962	0.982844	0.0310562	0.975424	0.968612	0.0386839
1434413_at	Igf1	insulin-like growth factor 1	0.9992	0.0140099	0.0164215	0.891107	0.185079	0.00628026	0.153254	0.975459	0.999951	0.01283	0.999749	0.998572	0.0180766	0.99329	0.909728	0.133503
1434418_at	LASS6	LAG1 homolog, ceramide synthase 6	0.0430606	0.0109613	0.0878551	0.700174	0.011589	0.143599	0.0193495	0.00498319	0.0250239	0	0.00984027	0.242195	0.0185537	0.0757834	0.0282042	0.00202992
1434422_at	1700066M21Rik	RIKEN cDNA 1700066M21 gene	0.0521788	0	0.000756441	0.0177058	0.004418	0.00131847	0.00182033	0.00301654	0.0198957	0.000544161	0.028488	0.0400543	0.00226428	0.011277	0.0109735	0.000549461
1434441_at	1110018J18Rik	hypothetical protein LOC100044674; RIKEN cDNA 1110018J18 gene	0.960021	0.00678928	0.0100325	0.37566	0.0945174	0.0102928	0.00474627	0.0332087	0.999498	1	0.222153	0.987946	0.00717728	0.490318	0.887797	0.019416
1434446_at	INSR	insulin receptor	0.846697	0.046024	0.0261817	0.868654	0.0275601	0.00513232	0.00324592	0.0341558	0.691309	0.110135	0.577697	0.998502	0.00128369	0.863963	0.914877	0.00176747
1434447_at	MET	met proto-oncogene	0.0575962	0.0105003	0.00397395	0.26536	0.0216619	0.00088956	0.00132002	0.00669989	0.0464233	0.00153525	0.0736072	0.89038	0.0150217	0.0292183	0.0315506	0.00112501
1434473_at	SLC16A5	solute carrier family 16 (monocarboxylic acid transporters), member 5	0.0201498	0.314911	0.00889165	0.169989	0.0103534	0.00136456	0.00270575	0.00244447	0.0810919	0.0211767	0.272503	0.0180604	0.000712461	0.078374	0.0297542	0.000846875
1434520_at	Sc5d	sterol-C5-desaturase (fungal ERG3, delta-5-desaturase) homolog (S. cerevisae)	0.0315032	0.000566373	0.000632059	0.0126317	0.00652663	0.00164135	0.00102636	0.00471562	0.01627	0.000654144	0.097305	0.203535	0.00439963	0.0118377	0.012448	1.39562e-05
1434766_at	prkaa2	protein kinase, AMP-activated, alpha 2 catalytic subunit	0.403391	0.00333573	0.00249331	0.280217	0.108733	0.000368899	0.00317099	0.00597076	0.0608708	0.000414825	0.0432311	0.863527	0.00857806	0.0374817	0.179718	0.0037716
1434778_at	WAPAL	wings apart-like homolog (Drosophila)	0.290322	0.000307646	0.000348332	0.0362534	0.00930725	0.00120615	4.62181e-06	0.00676326	0.0638482	0.000219858	0.0500949	0.72974	0.0338209	0.137519	0.367004	0.00371173
1434996_at	slc25a16	solute carrier family 25 (mitochondrial carrier, Graves disease autoantigen), member 16	0.926834	0.00176223	0.00190557	0.0914361	0.0547945	0.00168694	0.00381394	0.0214805	0.615173	0.00150474	0.609552	0.905404	0.00970177	0.600279	0.747667	0.0190704
1435074_at	tmem106b	transmembrane protein 106B	0.46437	0.00435678	0.00104167	0.0948267	0.044557	0.00101528	0.00133811	0.0219409	0.263596	0.000152778	0.227336	0.781777	0.143922	0.280964	0.626003	0.0647171
1435084_at	C730049O14Rik	RIKEN cDNA C730049O14 gene	0.0387052	0.00058775	0.000731109	0.0308817	0.00563064	0.000245428	0.00174873	0.00475417	0.0720913	0.000446154	0.086214	0.689576	0.00112791	0.138923	0.597086	0.047591
1435188_at	Gm129	predicted gene 129	0.0116917	0.000224631	0.000976254	0.0195823	0.00390328	7.52838e-05	0.000119754	0.00671748	0.104287	0.00478332	0.0130861	0.0101237	0.000859302	0.0128692	0.0114918	1.24708e-05
1435207_at	DIXDC1	DIX domain containing 1	0.052264	0.00374998	0.00319608	0.251008	0.0112329	0.000861121	0.00166597	0.00802683	0.0408832	0	0.0511947	0.905568	0.00267603	0.0244154	0.0821618	0.00178939
1435217_at	Gm7969	predicted gene 7969	0.058137	0.00097556	0.00103821	0.01749	0.00783167	0.00133984	0.00169051	0.0120182	0.0861902	1	0.0155804	0.0204344	0.00177824	0.0194073	0.0361013	0.00128604
1435233_at	Ncoa2	nuclear receptor coactivator 2	0.201773	0.00078442	0.000859054	0.0297591	0.0168251	0.00204864	0.00140528	0.00443642	0.0244018	0.000932141	0.0489586	0.68524	0.00834941	0.0214653	0.0561889	0.00234069
1435245_at	GLS2	glutaminase 2 (liver, mitochondrial)	0.0171739	2.60962e-16	0.000567684	0.038343	0.0232742	0.0274293	0.0587702	0.00308285	0.0491992	0.000918489	0.0538404	0.218534	0.0718844	0.020665	0.0106964	4.78515e-06
1435267_at	A430108E01Rik	RIKEN cDNA A430108E01 gene	0.739135	0.00121788	0.00314408	0.999971	0.0377185	0.00209884	0.0109837	0.71467	0.999005	0.000272783	0.928603	0.909924	0.161481	0.988255	0.989252	0.0168453
1435397_at	zbtb44	zinc finger and BTB domain containing 44	0.66114	0.00706681	0.00381999	0.189178	0.0297537	0.000349635	0.00282748	0.00607134	0.18693	0.000318477	0.0567679	0.670986	0.0048549	0.0822109	0.279174	0.0078664
1435436_at	Epas1	endothelial PAS domain protein 1; similar to Endothelial PAS domain protein 1	0.394588	0.00491174	0.00476662	0.671977	0.0351911	0.000487926	0.0684609	0.0119857	0.354404	0.00476245	0.452056	0.991678	0.00166258	0.670763	0.664655	0.00277923
1435521_at	MSI2	Musashi homolog 2 (Drosophila)	0.0174016	0.00044108	0.000376901	0.0145758	0.00621305	0.000523736	0.000691014	0.00430608	0.0531169	2.32908e-06	0.0231091	0.0228271	0.000827596	0.0149837	0.0443785	3.34166e-06
1435579_at	1435579_at	--	0.0291351	0.000683632	0.00474128	0.996125	0.0156221	0.000818421	0.0133592	0.00932628	0.0844202	0.000517024	0.0489921	0.420269	0.177223	0.0772099	0.0308871	0.000582205
1435595_at	1810011O10Rik	RIKEN cDNA 1810011O10 gene	0.0124909	0.000945277	0.000520663	0.0125637	0.00469165	3.72987e-07	0.00108744	0.00439649	0.022229	0.00728013	0.0578513	0.0401988	0.00260382	0.0111165	0.0105291	0.0005268
1435640_x_at	A130040M12Rik	RIKEN cDNA A130040M12 gene	0.01004	0.00052724	5.95409e-09	0.00942952	0.00406523	0.00174059	0	0.00387561	0.0100444	0.000486482	0.00719793	0.0153062	0.00133196	0.00957179	0.0115276	0.000571914
1435691_at	Agphd1	RIKEN cDNA C630028N24 gene	0.026729	0.00178538	0.000588964	0.0212843	0.00533419	0.000764072	0.00131124	0.00359323	0.0158924	0.00185687	0.109962	0.111951	0.0027862	0.0232787	0.0118214	6.18055e-05
1435836_at	PDK1	pyruvate dehydrogenase kinase, isoenzyme 1	0.995764	0.000381438	0.0115405	0.87727	0.216671	0.00235465	0.0048615	0.0471127	0.837918	0.0028138	0.771975	0.99142	0.00644571	0.874828	0.975741	0.00489882
1435887_at	SERPINA11	serine (or cysteine) peptidase inhibitor, clade A (alpha-1 antiproteinase, antitrypsin), member 11	0.033926	0.00494559	0.001375	0.0820609	0.0171803	0.000262978	0.00169355	0.0106681	0.331201	0.00869674	0.167118	0.0263711	0.00117589	0.0288999	0.0346487	0.000728478
1435888_at	egfr	epidermal growth factor receptor	0.0100456	0.00121951	0.000524431	0.0101997	0.0049743	0.0323498	0.0114048	0.0036162	0.0192688	0	0.00649047	0.0139659	0.000999907	0.0195501	0.0304146	0.000975282
1435972_at	cast	calpastatin	0.904169	0.00328046	0.00322397	0.998854	0.047699	0.00297299	0.00542426	0.152079	0.994446	0.0960051	0.800757	0.894343	0.235565	0.941832	0.989818	0.0139914
1436039_at	CMAH	cytidine monophospho-N-acetylneuraminic acid hydroxylase	0.0413737	1.67501e-05	0.000758563	0.0179115	0.00840737	0.00205958	0.00133281	0.00392334	0.017456	0.000393495	0.0214635	0.178635	0.0108746	0.0375811	0.317894	0.0150223
1436098_at	bchE	butyrylcholinesterase	0.142466	0.000380089	0.000354289	0.130393	0.229003	0.000376481	0.000892757	0.00123731	0.0624443	0.000510394	0.0283786	0.835852	0.031909	0.0724015	0.26292	0.00902899
1436113_a_at	st13	suppression of tumorigenicity 13	0.974864	0.00618508	0.00256364	0.739335	0.194413	0.0039279	0.00605793	0.194856	0.981824	0.015934	0.940615	0.899869	0.124001	0.971518	0.989336	0.0118252
1436129_at	Adam6b	a disintegrin and metallopeptidase domain 6B	0.0111221	0.00060495	0	0.0110686	0.00523631	0.000895263	0.00173577	0.0128489	0.100877	0.00538261	0.0584846	0.0389429	0.0021452	0.0272648	0.011301	0.000521525
1436168_at	C730029A08Rik	RIKEN cDNA C730029A08 gene	0.509428	0.000669858	0.000466964	0.034461	0.0151978	0.00101359	0.000957692	0.00851198	0.0703291	0.000668375	0.144094	0.951858	0.00557434	0.0466241	0.246101	0.00847345
1436169_at	C730029A08Rik	RIKEN cDNA C730029A08 gene	0.59289	0.000585264	0.00102574	0.0285182	0.0106569	0.00115439	0.00410088	0.010868	0.0564185	0.000442993	0.0635852	0.89996	0.00376469	0.0268289	0.0515096	0.00110424
1436203_a_at	1110059G02Rik	RIKEN cDNA 1110059G02 gene	0.977651	0.00544202	0.0158439	0.965625	0.128813	0.00375363	0.00805142	0.165531	0.999939	0.00339709	0.999414	0.99701	0.00676541	0.962449	0.996751	0.00739206
1436219_at	4933403F05Rik	RIKEN cDNA 4933403F05 gene	0.0195225	1.64198e-05	0.000784824	0.0116393	0.00395861	0.00227146	0.00181659	0.00344459	0.0098874	0.000711064	0.0196996	0.0129019	0.000824804	0.0101374	0.0153096	0.000757889
1436240_at	1436240_at	--	0.067118	0.00209465	0.000479633	0.200504	0.0109694	0.000754049	0.0254478	0.00484253	0.0850703	0.000697139	0.0122279	0.676248	0.025025	0.0263479	0.02083	0.000577135
1436326_at	RORA	RAR-related orphan receptor alpha	0.0959824	4.09887e-05	0.000331958	0.0192149	0.00525805	0.00157131	0.00273146	0.00282381	0.0165488	0.000109531	0.0220437	0.474729	0.0298354	0.0373571	0.318437	0.00255964
1436330_x_at	Gm7072	predicted gene 7072	0.0109263	0.000534368	4.02977e-05	0.00984274	0.00638705	0.000925671	0.00134055	0.00994334	0.0989805	0.00221521	0.0611006	0.017606	0.00142978	0.0302307	0.0125311	0.000740463
1436501_at	MTUS1	mitochondrial tumor suppressor 1	0.112601	0.00431922	0.00302371	0.0809529	0.059533	0.000120062	0.00454425	0.0100477	0.128267	0.000879333	0.0115848	0.163098	0.00646224	0.0311332	0.034722	0.000581128
1436502_at	MTUS1	mitochondrial tumor suppressor 1	0.772274	0.000321105	0.00483854	0.902044	0.0586472	0.0040236	0.998136	0.0899306	0.991925	0.00625403	0.874246	0.718903	0.0648202	0.999962	0.999911	0.00357356
1436523_s_at	1810022K09Rik	predicted gene 4540; RIKEN cDNA 1810022K09 gene	0.0611529	0.000357767	0.000152304	0.032	0.0167183	1.07038e-09	0.00387361	0.0052447	0.0969426	6.40987e-05	0.285797	0.608333	0.0040248	0.117221	0.589786	0.00981787
1436555_at	SLC7A2	solute carrier family 7 (cationic amino acid transporter, y+ system), member 2	0.0636651	0.00180067	0.000755019	0.024068	0.00613985	0.00183327	0.00117703	0.00344474	0.0254234	0.000134957	0.0109445	0.112703	0.00651421	0.197649	0.356125	0.00322855
1436590_at	PPP1R3B	protein phosphatase 1, regulatory (inhibitor) subunit 3B	0.0285458	0.047528	0.00129923	0.0236004	0.00481009	0	0.00118651	0.00359323	0.0143445	0.00182607	0.0874901	0.0538723	0.0035777	0.0124215	0.0190911	5.52119e-09
1436705_at	MMGT1	membrane magnesium transporter 1	0.0350893	0.000535539	0.0005787	0.0134385	0.0146058	2.85307e-05	0.00198546	0.00321989	0.0130005	0.000829513	0.0154674	0.040674	0.00490449	0.0133406	0.0671488	0.0014492
1436778_at	CYBB	cytochrome b-245, beta polypeptide	0.0176619	0.00302179	0.000677166	0.023874	0.0086282	0.000457118	0.00269718	0.00748682	0.0831993	0.00239285	0.0199913	0.564237	0.00999047	0.0683314	0.16115	0.00596538
1436817_at	exoc5	exocyst complex component 5	0.760176	0.00279495	0.0034398	0.961665	0.0793694	0.0138945	0.0091689	0.0788385	0.990624	0.00349429	0.953771	0.986952	0.0281594	0.860548	0.933826	0.0798954
1436918_at	LOC100044376	similar to Dual-specificity tyrosine-(Y)-phosphorylation regulated kinase 2	0.0344209	0.00204089	0.00120318	0.0225153	0.0143971	0.000374345	0.000716701	0.00379326	0.0190535	0	0.0126196	0.312136	0.0123759	0.0158207	0.0269734	0.000590903
1437019_at	2200001I15Rik	RIKEN cDNA 2200001I15 gene	0.0185192	0.000949305	0.000962954	0.0335151	0.00786053	0.00168928	0.00093013	0.00520184	0.0546263	0.00107357	0.135714	0.0130204	0.00226054	0.0582638	0.0334278	0.000957547
1437040_at	ETNK2	ethanolamine kinase 2; similar to putative ethanolamine kinase	0.017744	0.000578909	7.38656e-05	0.0163208	0.00372145	0.0305601	0.0261937	0.0186128	0.221082	0.00708613	0.0251657	0.0266067	0.000959342	0.112301	0.0219352	0.00049743
1437064_at	Ar	androgen receptor	0.0148846	0.000823819	0	0.012104	0.00566692	1.29651e-09	0.00170891	0.00321887	0.0109745	0.000531075	0.00707475	0.0123893	0.00292563	0.116162	0.0148376	0.00015372
1437065_at	ZBTB20	zinc finger and BTB domain containing 20	0.490111	0.000577966	0.00161193	0.978594	0.0287763	0.000674829	0.00160831	0.189133	0.879386	0.312003	0.145683	0.950093	0.0668156	0.711104	0.923925	0.0071889
1437070_at	CDC14B	CDC14 cell division cycle 14 homolog B (S. cerevisiae)	0.0242159	0.00346849	0.0128479	0.234734	0.0338361	0.0011542	0.00203476	0.00623456	0.0301051	1	0.0540108	0.0229982	0.00147988	0.0228047	0.026648	0.000970713
1437073_x_at	SLC25A30	solute carrier family 25, member 30	0.0116704	0.00361459	2.52721e-06	0.0251389	0.00617288	0.00551614	0.00900159	0.003242	0.0125531	1.94172e-08	0.0430695	0.152252	0.00788265	0.0128853	0.0216026	0.000842304
1437158_at	nipbl	Nipped-B homolog (Drosophila)	0.777143	0.00323222	0.00274275	0.998248	0.0552383	0.0046194	0.0470548	0.592654	0.999618	0.0116249	0.734597	0.999992	0.0110503	0.968784	0.987984	0.0152388
1437162_at	Caprin1	cell cycle associated protein 1	0.0534811	0.000530147	0.000569235	0.0240992	0.00599062	0.00043926	0.000749623	0.00385518	0.013569	0.000201723	0.0120531	0.116612	0.00184839	0.0152086	0.0189534	6.40396e-05
1437197_at	SORBS2	sorbin and SH3 domain containing 2	0.0739967	2.16209e-06	0.000577752	0.0272221	0.0571179	0.000722954	0.000966458	0.00307689	0.0547909	0.00055308	0.00875182	0.0698956	0.00392256	0.0172654	0.0684561	0.0014773
1437200_at	FCHO2	FCH domain only 2	0.078359	0.00216789	0.00239727	0.0622144	0.0649804	0.000582051	0.000417029	0.0148553	0.267807	0.000751822	0.0196039	0.637789	0.108292	0.0669858	0.15148	0.00817746
1437207_at	Rnf170	ring finger protein 170	0.0357098	0.00590737	0.0023726	0.0356096	0.0158872	0.00066932	0.00016959	0.00686283	0.0443425	0	0.00993553	0.0698882	0.00129137	0.0592974	0.0247035	0.00118091
1437250_at	Mreg	melanoregulin	0.0167466	0	0.00144974	0.0185587	0.00413352	0.000724966	0.00134043	0.00368098	0.0107589	0	0.0148155	0.0102218	3.01271e-08	0.0202716	0.0109122	0.000586135
1437287_at	1110020G09Rik	RIKEN cDNA 1110020G09 gene	0.999777	0.0137359	0.00538006	0.873879	0.130319	0.00547084	0.0138296	0.265337	0.995586	0.00962595	0.924375	0.940045	0.0571327	0.999822	0.997877	0.00564111
1437372_at	Cpsf6	cleavage and polyadenylation specific factor 6	0.886759	0.00566782	0.00374056	0.915066	0.0406251	0.000625789	0.00949132	0.166088	0.997148	0.171922	0.582562	0.990146	0.0190629	0.764697	0.881679	0.00415923
1437395_at	ZCCHC11	zinc finger, CCHC domain containing 11	0.131625	0.00180356	0.00127384	0.0380455	0.0103638	0.000673135	0.00132355	0.00581899	0.117255	0.000890489	0.011841	0.39201	0.0167531	0.0270759	0.0366313	0.000636542
1437426_at	LOC100044766	similar to WW domain-containing adapter protein with coiled-coil; WW domain containing adaptor with coiled-coil	0.971002	0.00332405	0.00217679	0.999526	0.0430341	0.00611581	0.0207939	0.336849	0.966832	0.0591178	0.478421	0.989158	0.0246635	0.985577	0.993259	0.00676196
1437453_s_at	pcsk9	proprotein convertase subtilisin/kexin type 9	0.0142492	0.000476581	0.000638466	0.0116681	0.00773803	0.00402149	0.11183	0.00440898	0.0205846	7.48006e-06	0.0621577	0.0385189	0.00121051	0.0325817	0.0209955	0.00116596
1437467_at	Alcam	activated leukocyte cell adhesion molecule	0.0463795	0.000942832	0.000992151	0.120068	0.0131673	0.000290013	0.0831205	0.0074117	0.0404219	0.000634579	0.0189982	0.971723	0.0132949	0.0375795	0.0445728	0.000960007
1437478_s_at	Efhd2	similar to EF hand domain containing 2; EF hand domain containing 2	0.0188779	0.00147974	1.46374e-07	0.0215303	0.00810802	0.00112091	0.0206033	0.0111201	0.0208201	0.0014793	0.0167262	0.0467395	0.00281134	0.0468872	0.0236037	0.0010738
1437675_at	SLC8A1	solute carrier family 8 (sodium/calcium exchanger), member 1	0.0122744	0.00332544	0.00306566	0.0319288	0.0123102	0.00517446	0.00244659	0.00357572	0.0209994	0.000611415	0.00682933	0.0140097	0.00122026	0.0162818	0.0149262	0.000818717
1437735_at	PPP1R12A	protein phosphatase 1, regulatory (inhibitor) subunit 12A	0.410103	0.00225397	0.00178998	0.168615	0.0267899	0.0106173	0.00243591	0.0136654	0.227603	0.00204139	0.0966507	0.955594	0.038506	0.160709	0.855623	0.0113296
1437811_x_at	cotl1	coactosin-like 1 (Dictyostelium)	0.0185715	0.00372409	0.222396	0.624009	0.0285268	0.00125339	0.201055	0.00461402	0.0450671	0.00105853	0.0351759	0.0975915	0.00557285	0.019178	0.0160442	0.000587644
1437983_at	sall1	sal-like 1 (Drosophila)	0.025452	9.76905e-10	0.000618629	0.0121611	0.0103035	0.000190908	0.00032289	0.00432355	0.0297357	0.00221084	0.0827592	0.0143737	0.000102773	0.23801	0.111022	0.0070748
1438018_at	HOOK1	hook homolog 1 (Drosophila)	0.985523	0.00346923	0.00437727	0.924528	0.101349	0.00275168	0.00560667	0.137401	0.952018	0.0328546	0.808502	0.98618	0.0316687	0.886227	0.990599	0.0102422
1438035_at	fam82a1	family with sequence similarity 82, member A1	0.595541	0.00248649	0.00064756	0.0261549	0.0178133	0.000883974	0.00121112	0.00334952	0.0202126	0.000342407	0.0442486	0.350253	0.00312505	0.0228875	0.0210274	2.27013e-05
1438036_x_at	fam82a1	family with sequence similarity 82, member A1	0.917082	0.00549726	0.00138015	0.0491078	0.0287948	0.00605937	0.00873054	0.00908089	0.108536	0.00264011	0.773078	0.826667	0.00794954	0.0729514	0.105337	0.000580465
1438055_at	RARRES1	retinoic acid receptor responder (tazarotene induced) 1	0.0297229	0.00742905	0.00267431	0.0300002	0.011791	0.00665585	0.00226108	0.00835412	0.0295061	0.0018299	0.0259789	0.775018	0.0192336	0.0283001	0.0349298	0.00172896
1438130_at	taf15	TAF15 RNA polymerase II, TATA box binding protein (TBP)-associated factor	0.0196744	0.000634503	0.000239421	0.0245919	0.0584456	0.000131136	0.000556591	0.0131098	0.0209914	0.000749636	0.0134619	0.0381144	0.00201642	0.0381483	0.103517	0.0175515
1438157_s_at	NFKBIA	nuclear factor of kappa light polypeptide gene enhancer in B-cells inhibitor, alpha	0.027335	0.00123034	0.00136116	0.0351885	0.989433	0.00130556	0.00245794	0.0601344	0.767915	0.00316456	0.106132	0.0315632	0.000435625	0.0274209	0.0324976	0.00172953
1438238_at	2010315B03Rik	RIKEN cDNA 2010315B03 gene	0.833689	0.00310785	0.00302974	0.248978	0.150079	0.00529021	0.0221131	0.0171208	0.710183	0.000254506	0.746099	0.98671	0.00223514	0.266777	0.872441	0.0999955
1438239_at	LOC671548	similar to midline 1; midline 1	0.0110139	0.00220972	0.000687843	0.0120896	0.00423977	0.000710759	0.00443662	0.00401313	0.0226413	0.00119103	0.0462877	0.0104991	0.000752602	0.0121777	0.0174822	0.000663924
1438487_s_at	Gm8261	zinc finger, ZZ domain containing 3; predicted gene 8261	0.633016	8.71256e-05	9.19128e-05	0.0165468	0.00658489	0.000366648	0.00332736	0.00392151	0.0175994	0.000170287	0.0186837	0.102234	0.00847505	0.0180071	0.0339438	0.00077312
1438561_x_at	TMEM180	transmembrane protein 180	0.0234062	0.000353024	0.00779228	0.110177	0.472964	4.3038e-05	0.000515721	0.00585894	0.117101	0.00221071	0.706676	0.142938	0.0136521	0.034244	0.0480946	0.000861393
1438596_at	1500017E21Rik	RIKEN cDNA 1500017E21 gene	0.0555418	0.00028913	0	0.0120346	0.0212885	0.000617417	4.14668e-05	0.00313994	0.0122868	0.000558557	0.00999505	0.148844	0.0122203	0.0177459	0.0148937	0.000554832
1438617_at	Serpina7	serine (or cysteine) peptidase inhibitor, clade A (alpha-1 antiproteinase, antitrypsin), member 7	0.0211358	0.000766539	0.000793372	0.0209815	0.00701972	0.00127069	0.0137541	0.0172767	0.0322714	0.000667477	0.025116	0.796996	0.0114457	0.0599774	0.0871332	0.00381861
1438724_at	OSBPL3	oxysterol binding protein-like 3	0.0240767	0.000192156	0.000391426	0.0149796	0.00425492	0.26629	0.155874	0.00373682	0.0134288	0.000401259	0.00726493	0.057574	0.0102429	0.0238076	0.0241275	0.000584311
1438751_at	slc30a10	solute carrier family 30, member 10	0.0347863	0.0889883	0.0372258	0.830851	0.0126548	0.00173467	0.0225716	0.0033727	0.0493939	0.000844142	0.0168897	0.397817	0.0186989	0.0238376	0.0219365	0.000463823
1438858_x_at	H2-Ea	histocompatibility 2, class II antigen A, alpha; histocompatibility 2, class II antigen E alpha	0.125306	9.0577e-05	0.0006183	0.0792972	0.655849	0.000808306	0.896927	0.0266043	0.0471033	8.01088e-09	0.0150133	0.830184	0.0350245	0.116781	0.0571414	0.00143669
1438871_at	SON	Son DNA binding protein	0.792869	0.000843514	0.00264369	0.992993	0.0295451	0.00217608	0.0170405	0.0780137	0.872087	0.0464129	0.194219	0.980143	0.0434717	0.807182	0.867359	0.00612983
1438936_s_at	Ang	angiogenin, ribonuclease, RNase A family, 5	0.122347	0.00446321	0.00263976	0.965848	0.0124171	0.880456	7.16533e-05	0.0213172	0.476285	0.00988745	0.231458	0.063451	0.00226887	0.151503	0.0660659	0.00176358
1438937_x_at	Ang	angiogenin, ribonuclease, RNase A family, 5	0.0926927	0.00201728	0.0030716	0.311821	0.00739179	0.897597	0.000583192	0.0114508	0.272098	0.0107219	0.171274	0.0425056	0.00054068	0.154189	0.0468908	0.000565756
1439010_at	Larp4	La ribonucleoprotein domain family, member 4; predicted gene 14373; predicted gene 8177	0.994456	0.014611	0.00311178	0.923274	0.125713	0.00382178	0.00840998	0.0950729	0.999938	0.00527048	0.996348	0.877561	0.231652	0.99416	0.999813	0.00328247
1439029_at	GPT2	glutamic pyruvate transaminase (alanine aminotransferase) 2	0.0225823	0.00100134	0.00310589	0.0518485	0.0223256	0.0170455	0.393162	0.00150257	0.0147379	0.000377318	0.00936431	0.0433338	0.00413342	0.0468233	0.0275473	0.000424637
1439050_at	GCLM	glutamate-cysteine ligase, modifier subunit	0.997551	0.0125064	0.0037601	0.435597	0.466676	0.00185581	0.00768321	0.477223	0.861987	0.00166039	0.800813	0.971614	0.0114461	0.856926	0.926329	0.0432751
1439068_at	ERAP1	endoplasmic reticulum aminopeptidase 1	0.68916	0.00454558	0.00572801	0.33036	0.642232	0.00166519	0.00227134	0.171232	0.390016	0.000172202	0.310035	0.96663	0.0014863	0.316431	0.612823	0.0204332
1439107_a_at	MLL5	myeloid/lymphoid or mixed-lineage leukemia 5	0.0777125	0.0110696	0.00475194	0.937741	0.0156966	0.00151563	0.00221173	0.00950147	0.113204	0.00161924	0.0317762	0.946412	0.0166666	0.0601513	0.0544563	0.00124728
1439117_at	CLMN	calmin	0.0104615	0.000588914	2.76106e-05	0.0102288	0.0040842	0.00143303	0	0.0108378	0.0493721	0.0027303	0.00769033	0.0108852	0.00163692	0.0170087	0.0121105	0.000549777
1439163_at	ZBTB16	zinc finger and BTB domain containing 16	0.0106032	1.42827e-05	0.00103142	0.0155686	0.00411187	0.000930743	0.00192783	0.00488979	0.0117352	0.00152518	0.00674193	0.013139	0.00117305	0.0156907	0.0106205	0.00103838
1439189_at	FNIP2	folliculin interacting protein 2	0.0127855	0.000816273	0.000423483	0.0143226	0.0058062	0.00283983	0.00942773	0.00412962	0.0173464	0.00201469	0.0937628	0.375759	0.00692768	0.0208152	0.0132379	0.000676146
1439276_at	Adar	adenosine deaminase, RNA-specific	0.0139334	0.000488437	6.825e-05	0.0246013	0.126279	0.00850894	0.0379927	0.00341229	0.0130808	0.000446611	0.00748054	0.0427476	0.0014113	0.0164464	0.0783356	0.00163857
1439293_at	BC031353	cDNA sequence BC031353	0.0117511	0.000205481	0.000201392	0.0127067	0.0071023	3.98018e-05	0.000944944	0.0230746	0.268939	0.0418867	0.0348754	0.0136148	0.00105583	0.0499523	0.108022	0.00516579
1439342_at	clpX	caseinolytic peptidase X (E.coli)	0.0113198	0.00053817	0.000505773	0.0125811	0.00399731	0.000695013	0.00112558	0.00327043	0.0205026	0.000559274	0.00800939	0.0107863	0.00107007	0.0190918	0.0106774	0.000640511
1439566_at	GPRIN3	GPRIN family member 3	0.00929695	0.000528224	0.000770869	0.0120397	0.00724775	0.000974298	0.00112752	0.0260865	0.0107998	0	0.0081992	0.0195572	2.34857e-05	0.0127574	0.0223336	0.00223274
1439617_s_at	PCK1	phosphoenolpyruvate carboxykinase 1, cytosolic	0.0529401	0.00298537	0.010009	0.167372	0.00666559	0.00103608	0.00166484	0.00349229	0.0178535	1.61643e-08	0.00819672	0.0149868	0.00115371	0.0850287	0.0206002	0.000661291
1439624_at	Ugt2b35	UDP glucuronosyltransferase 2 family, polypeptide B35	0.0173205	0.00729997	0.17256	0.243379	0.00954317	0.0017423	0.00364947	0.00386175	0.0146487	0.000884143	0.027541	0.0159087	0.000953376	0.0207633	0.0166025	0.00051384
1439675_at	PPARA	peroxisome proliferator activated receptor alpha	0.0366863	0.000772832	0.000381116	0.0197599	0.00576542	0.00144761	0.00379366	0.00607203	0.033476	0.00414347	0.206226	0.485224	0.0474045	0.0324816	0.0153753	0.000319224
1439831_at	Gm4951	predicted gene 4951	0.146657	0.00330696	0.0025512	0.0394407	0.0269869	0.00233551	2.20913e-05	0.00576723	0.0343481	6.74373e-05	0.0435149	0.953681	0.00324835	0.0270817	0.0560345	0.00199208
1439940_at	1439940_at	--	0.594614	0.00116656	0.000501771	0.0386827	0.00961519	0.00115455	0.00452477	0.020578	0.56465	0.0051233	0.0542826	0.0796983	0.00083619	0.0454135	0.0470411	0.00120873
1440254_at	LOC100045398	hypothetical protein LOC100045398	0.0173798	0.000406364	0.000579945	0.0243085	0.044324	1.58331e-05	0.000295665	0.0121366	0.248284	0.00297892	0.019307	0.0204434	0.000598511	0.175793	0.531995	0.0482069
1440260_at	Ccdc58	coiled-coil domain containing 58	0.549143	0.0134888	0.0037646	0.980465	0.0247966	0.00156197	0.00272855	0.269853	0.838802	0.022503	0.654693	0.998886	0.00275798	0.482943	0.543832	0.0171472
1440327_at	AI195470	expressed sequence AI195470	0.92951	0.00140215	0.00950089	0.967335	0.0981692	0.00169346	0.0139336	0.20966	0.665504	0.00187865	0.620295	0.900236	0.00609417	0.961056	0.875807	0.00662358
1440351_at	1440351_at	--	0.0182671	1.22019e-05	0.000654105	0.0103674	0.00437764	0.00118694	0.00116681	0.00786612	0.0183889	0.00136552	0.00777227	0.0885217	0.00427011	0.010451	0.0119644	0.000556255
1440506_at	SLC7A2	solute carrier family 7 (cationic amino acid transporter, y+ system), member 2	0.0110191	0.00117767	0.00187772	0.0190522	0.00941068	0.00191115	0.0030708	0.00297302	0.0140779	0.000571295	0.00752263	0.0130751	0.00115159	0.0125053	0.0680956	0.00219905
1440624_at	A230006I23Rik	RIKEN cDNA A230006I23 gene	0.351058	0.00334517	0.00142677	0.196148	0.134471	0.00208949	0.00490917	0.0684393	0.0523448	0.00153513	0.0400416	0.997253	0.00334606	0.0546409	0.0547769	0.00183374
1440771_at	ZKSCAN1	zinc finger with KRAB and SCAN domains 1	0.0331521	0.00175972	0.00491006	0.0400807	0.295202	0.0143695	0.0199462	0.00644274	0.089174	0.0030251	0.0199969	0.0224778	0.000975398	0.0225487	0.0536316	0.00163628
1440816_x_at	DDX1	DEAD (Asp-Glu-Ala-Asp) box polypeptide 1	0.0293574	0.00036951	0.000172572	0.0175451	0.00403682	0.000465343	0.000518919	0.00463387	0.029654	0.00386246	0.491346	0.221124	0.000922979	0.0439681	0.106634	0.0010517
1440818_s_at	sf3b1	splicing factor 3b, subunit 1	0.147755	0.000456489	0.000127097	0.0196307	0.00630182	0.000114651	0.000324515	0.00602137	0.056724	0.0541959	0.135534	0.520452	0.0132316	0.0212427	0.0543023	0.00136798
1440899_at	FMO5	similar to Flavin containing monooxygenase 5; flavin containing monooxygenase 5	0.0551602	0.00219089	0.000660652	0.0111551	0.00534042	0.00252701	0.00338223	0.00286643	0.0111588	0.000838048	0.0124604	0.0217407	0.00178041	0.0108198	0.0286286	5.77134e-06
1440921_at	1440921_at	--	0.018244	0.00118753	0.000522494	0.0407283	0.0137545	0.00142868	0.0031729	0.00706107	0.0177679	0.000413096	0.0143404	0.0191677	0.000713922	0.0201005	0.0195993	0.000514604
1440993_at	AW111846	expressed sequence AW111846	0.286405	0.0252844	0.00363844	0.159019	0.0270122	0.00105879	0.0038892	0.00605646	0.0683621	0.000676896	0.0429532	0.580617	0.0207968	0.0802695	0.254225	0.00130637
1441315_s_at	SLC19A2	solute carrier family 19 (thiamine transporter), member 2	0.0180576	0.000369803	0.00340438	0.0612081	0.129076	0.000459711	0.00130379	0.0047763	0.103418	0.0052783	0.448315	0.0208968	0.000445555	0.0512653	0.0159821	0.000630911
1441326_at	CP	ceruloplasmin	0.0268536	0.00176693	0.0085577	0.21941	0.00563159	0.000614824	0.000907265	0.0044973	0.0435129	0.000568627	0.0197131	0.101077	0.00512353	0.0139778	0.0340406	0.000100408
1441396_at	B3galt1	UDP-Gal:betaGlcNAc beta 1,3-galactosyltransferase, polypeptide 1	0.010288	0	0.00220927	0.0249959	0.00754286	0.000663113	0	0.00439858	0.023314	1.14684e-05	0.0375184	0.0124698	0	0.0102426	0.0119256	0.000727426
1441430_at	1441430_at	--	0.0338579	0.000667704	0.000903743	0.0215921	0.00620856	0.00275756	0.0631741	0.00462299	0.0170048	0	0.00763865	0.0133685	0.000900245	0.0179272	0.0775005	0.00255046
1441765_at	PANK1	pantothenate kinase 1	0.56907	0.0175105	0.00106172	0.253271	0.0137633	0.00147023	0.00225293	0.0152793	0.560323	0.00115659	0.916757	0.956513	0.00237585	0.276146	0.710135	0.018703
1441799_at	6030422H21Rik	RIKEN cDNA 6030422H21 gene	0.0114161	0.000142143	0.000537051	0.0123749	0.0138841	0.00107265	0.00118014	0.00873377	0.206541	0.000586212	0.0161937	0.0246695	0.00316003	0.0141464	0.0119087	0.000567416
1441811_x_at	Tmem176a	transmembrane protein 176A	0.030344	0.000606632	0.000518824	0.0135269	0.0360305	0.000807838	0.0104962	0.00455533	0.127374	0.00287074	0.0463229	0.0130934	0.000827671	0.0111183	0.0128077	0.000613247
1441915_s_at	PLIN5	RIKEN cDNA 2310076L09 gene	0.0166415	0.000868522	0.00140947	0.591888	0.244428	0.000602225	0.000376281	0.0866985	0.329195	0.00227501	0.0207316	0.233746	0.00225353	0.0211843	0.0259538	0.000115965
1441972_at	6230424C14Rik	RIKEN cDNA 6230424C14 gene	0.0640879	0.00770393	0.0107792	0.235951	0.192793	3.24404e-08	0.000351866	0.00422278	0.0220723	2.69038e-05	0.0251579	0.915917	0.00550681	0.0301797	0.106907	0.0067148
1441988_at	Ppm1k	protein phosphatase 1K (PP2C domain containing)	0.131379	0.00065971	0.000529078	0.0121356	0.00448566	2.98278e-05	0.00196922	0.0044208	0.0168215	0.000546156	0.00796775	0.0730839	0.00268443	0.013394	0.0296082	0
1442003_at	Diap2	diaphanous homolog 2 (Drosophila)	0.689949	0.000174004	0.00310254	0.411142	0.0933041	0.000669931	0.00166692	0.0127461	0.272128	0.00915761	0.0552597	0.955768	0.034775	0.247112	0.395986	0.00135168
1442027_at	NBEAL1	neurobeachin like 1	0.792796	0.00669996	0.00730996	0.991037	0.0610488	0.0016429	0.00558172	0.20348	0.968032	0.376583	0.349321	0.996003	0.019534	0.921041	0.955507	0.0400674
1442049_at	1442049_at	--	0.0121451	3.99941e-06	0.00068925	0.0372457	0.00528007	0.00226036	0.00634087	0.00349688	0.0228484	0	0.0143347	0.0290242	0.00801437	0.0121923	0.033178	0.00128004
1442409_at	D9Wsu90e	DNA segment, Chr 9, Wayne State University 90, expressed	0.0147189	0.000727436	0	0.0220941	0.00568062	0.0515733	0.0172323	0.001912	0.0157636	0.000459526	0.0431343	0.429766	0.0200516	0.0141765	0.0147774	0.000688207
1442537_at	1442537_at	--	0.0136739	0.0108241	0.0426639	0.254242	0.0145892	0	0.00184386	0.00424011	0.0131392	0.000439849	0.00902466	0.0332555	0.000738982	0.0133486	0.0151387	0
1442593_at	1442593_at	--	0.158623	0.0537535	0.0130789	0.898191	0.0162129	3.16189e-05	0.0054355	0.0282441	0.436832	0.0065936	0.163321	0.996419	0.00719497	0.1162	0.178171	0.00332807
1442656_at	Gm11295	predicted gene 11295; ELOVL family member 6, elongation of long chain fatty acids (yeast)	0.00976265	3.29361e-06	0.000495868	0.0102216	0.00411624	0.00196721	0.00252754	0.00317681	0.0111994	0.000481072	0.0143319	0.0156805	0	0.0114188	0.00968886	0.000524761
1442786_s_at	RUFY3	RUN and FYVE domain containing 3	0.0323379	0	0.000569758	0.0126789	0.00391532	0.00224067	0.00170217	0.00423093	0.0254311	0.000514052	0.00758574	0.0945185	0.00401628	0.0119637	0.0174193	0.000738957
1442849_at	lrp1	low density lipoprotein receptor-related protein 1	0.0122287	0.000704474	0.000487461	0.0112818	0.0038231	0.000694114	1.96072e-05	0.0416232	0.0328572	0.00367389	0.0121569	0.0209666	0.0117981	0.0148486	0.0868064	0.0171421
1443017_at	CPEB2	cytoplasmic polyadenylation element binding protein 2	0.0407777	0.000609549	4.75883e-05	0.0133862	0.00638069	0	0.00358411	0.00461403	0.030229	0.000734995	0.00728016	0.140453	0.00824662	0.0165377	0.0127579	0
1443109_at	PPPDE1	PPPDE peptidase domain containing 1	0.112656	0.00394538	0.0122938	0.392879	0.0107676	0.000187266	0.000724344	0.00778411	0.35934	0.0145812	0.0143504	0.418298	0.0557031	0.024003	0.0232981	2.16304e-06
1443147_at	Acot3	acyl-CoA thioesterase 3	0.0379145	0.0150831	0.00421701	0.0878434	0.0167738	0.00171272	0.00270056	0.00332181	0.0113195	8.94741e-07	0.0280622	0.0271462	0.00116095	0.0374426	0.0242265	0.00108861
1443516_at	ATXN2	ataxin 2	0.0162261	0.00210528	0.00652911	0.0563758	0.0251153	4.9361e-05	1.15846e-06	0.00341648	0.0232617	0.00510746	0.144025	0.0303055	0.0251309	0.0138966	0.0380757	0.0015725
1443579_s_at	Depdc6	DEP domain containing 6	0.835668	0.00224952	0.00134227	0.578869	0.337948	0.00151527	0.0583005	0.106479	0.92495	0.0226189	0.868031	0.878457	0.0617166	0.877028	0.96314	0.0053725
1443783_x_at	H2-Ea	histocompatibility 2, class II antigen A, alpha; histocompatibility 2, class II antigen E alpha	0.0746389	1.17773e-06	0.000710547	0.0730296	0.278968	0.000610461	0.975224	0.0253353	0.0419233	0.000700178	0.018928	0.772725	0.00316949	0.0337788	0.0320049	0.00012368
1443822_s_at	CISD1	CDGSH iron sulfur domain 1	0.0452851	0.000251964	0.00101396	0.0214226	0.00612094	0	0.00116678	0.00399652	0.0273422	0.00176227	0.288328	0.0168933	0.000910863	0.0339007	0.0135612	0.000502464
1443827_x_at	FAM20C	family with sequence similarity 20, member C	0.0241618	0.00190615	0.0056985	0.093079	0.680684	0.0259968	0.0545491	0.00497657	0.190795	0.00277799	0.254892	0.0210635	0.000477589	0.0380208	0.109331	0.00112439
1443829_x_at	COASY	Coenzyme A synthase	0.0309083	0.00343639	0.0142883	0.530295	0.562901	0.000391919	0.00112352	0.336832	0.693995	0.00450891	0.0978743	0.036604	0.000567723	0.0331393	0.0512116	0.00140727
1443838_x_at	FADS2	fatty acid desaturase 2	0.00991078	0.00255376	0.000544363	0.0101461	0.00570453	0.00241602	0.00827763	0.00355603	0.011348	1.10136e-05	0.0132001	0.0425431	0.00171644	0.0110537	0.00979649	0.000523101
1443870_at	abcc4	ATP-binding cassette, sub-family C (CFTR/MRP), member 4	0.0121102	3.44003e-07	0.000495035	0.0113962	0.00520513	0.00259538	0.0014945	0.00375138	0.0104831	0.000585082	0.00743636	0.0227702	0	0.0127933	0.0108347	0.000524174
1443889_at	9030619P08Rik	RIKEN cDNA 9030619P08 gene	0.0279758	0.00124857	0.000645542	0.00992592	0.00419863	0.000617286	0	0.00340144	0.0143499	0	0.0802835	0.013139	0.00073958	0.0339835	0.0160267	0
1444037_at	Lman1	lectin, mannose-binding, 1	0.0203444	6.75647e-11	0.000899581	0.0216094	0.0287757	0.00426536	0.00343947	0.00903646	0.0213656	0.000968732	0.0128091	0.0211644	0.00176371	0.0249465	0.999448	0.00150028
1444326_at	p4hb	prolyl 4-hydroxylase, beta polypeptide	0.165953	0.00058129	0.000629861	0.0194238	0.0154067	0.0438366	0.0202811	0.00595022	0.0264089	0.000137191	0.0161553	0.0744374	0.00144587	0.0357211	0.959819	0.0192972
1444518_at	ACOX1	acyl-Coenzyme A oxidase 1, palmitoyl	0.0121963	0.000660531	2.30121e-05	0.00955465	0.00438693	0.00383502	0.00103586	0.00345992	0.0519271	0.0189857	0.0378549	0.0614717	0.0263361	0.0933787	0.0426975	0.00246815
1444810_at	ACACA	predicted gene 5182; acetyl-Coenzyme A carboxylase alpha	0.0130996	0.000537756	0	0.011023	0.0071662	0.00131722	0.00429186	0.00342151	0.0135878	0.000475023	0.0111408	0.100252	0.00133391	0.0118073	0.0111545	0.000579862
1444980_at	ONECUT2	one cut domain, family member 2	0.7424	0.00282258	0.00309219	0.646292	0.0905421	0.00048938	0.00098732	0.0279214	0.681647	0.0224406	0.262336	0.978144	0.0223287	0.327016	0.174256	0.00147968
1445062_at	Gm11295	predicted gene 11295; ELOVL family member 6, elongation of long chain fatty acids (yeast)	0.00979501	1.66651e-06	0.00132476	0.0137971	0.00875121	0.00426571	0.00303163	0.00586841	0.0104358	0.000496346	0.0128767	0.0101712	0.00210301	0.0107494	0.0107383	0.000608518
1445065_at	ATP11C	ATPase, class VI, type 11C	0.0162991	0.000612375	1.38976e-05	0.015127	0.00462825	0.00122709	0.0012628	0.00298394	0.0101021	0.000699058	0.0206174	0.0259824	0.00157094	0.0179932	0.0254566	0.00193175
1445379_at	ATP11C	ATPase, class VI, type 11C	0.538777	0.0345422	0.0159239	0.846259	0.0302664	0.00351369	1.81816e-05	0.00981313	0.0641534	0.000587348	0.0234294	0.969529	0.00487278	0.120367	0.229138	0.00353531
1445402_at	adk	adenosine kinase	0.0587713	0.0073341	0.00661932	0.671576	0.0147907	0.00139842	0.000576848	0.006023	0.0277935	0.00255658	0.0193819	0.813387	0.0252124	0.0376881	0.0547058	0.00120428
1445534_at	FLNB	filamin, beta	0.0126725	0.000512014	0.0006788	0.0119112	0.0137408	0.0126921	0.00949506	0.00287972	0.0187811	0.00162788	0.0109463	0.0558998	0.00273205	0.0172788	0.0145974	0.000583773
1445562_at	ZBTB16	zinc finger and BTB domain containing 16	0.0227495	0.000625555	0.000574422	0.0245195	0.0157921	1.4031e-05	0.0219535	0.00522787	0.103268	0.000370614	0.0130542	0.0321786	0.00887297	0.0189397	0.0275673	0.0010333
1445641_at	1445641_at	--	0.0116784	1.53467e-06	0.0017762	0.0157022	0.0212688	0.00532861	0.0139327	0.00515522	0.0123193	0	0.00965581	0.0103509	0.000948618	0.0114962	0.0113802	0.00066235
1445676_at	KCNN2	potassium intermediate/small conductance calcium-activated channel, subfamily N, member 2	0.0252395	0.000755053	0.000493444	0.0248269	0.297028	1.19762e-12	0.000160687	0.00779178	0.460481	0.0231199	0.0243615	0.0154902	0	0.0238002	0.0360976	0.00104158
1445680_x_at	f2rl2	coagulation factor II (thrombin) receptor-like 2	0.0180307	0.000176778	0.000649944	0.0137056	0.00599751	0.000269561	0.00347573	0.00892134	0.0328538	0.00151465	0.0211736	0.023498	0.00111843	0.0280238	0.0172714	0
1445897_s_at	IFI35	interferon-induced protein 35	0.0498078	0.00169613	0.00183586	0.0666293	0.983881	0.00263272	0.00395919	0.020596	1	0.00461407	0.0258105	0.0386332	0.00223271	0.146071	0.106015	0.00178333
1446068_at	adk	adenosine kinase	0.271198	0.00105638	0.00258967	0.966948	0.0225042	0.00540014	0.00235421	0.0753208	0.2209	0.0477401	0.0971805	0.996222	0.00586365	0.420693	0.516926	0.00199371
1446130_at	1446130_at	--	0.0259889	0.000959127	0.000755536	0.0508538	0.0105408	0.000967943	0.009435	0.00478137	0.0299598	0.00381046	0.114626	0.115846	0.00313608	0.0218625	0.0462152	0.00106322
1446155_at	2700089E24Rik	RIKEN cDNA 2700089E24 gene	0.106279	0.000216565	0.000545473	0.0191345	0.094905	0.000854555	0.00142728	0.00516146	0.0585738	0.00044592	0.0219142	0.313741	0.0215607	0.0197864	0.0939633	0.00224415
1446234_at	Kdm6a	4lysine (K)-specific demethylase 6A	0.0555711	0.0145741	0.0118627	0.267685	0.0366296	0.000718779	1.6455e-05	0.00381297	0.0199288	0	0.0110238	0.265938	0.0136248	0.0969138	0.0441975	0.000149988
1446284_at	mtss1	metastasis suppressor 1	0.0149864	0.000314772	0.00232706	0.0302027	0.445083	0.000513727	0.0155472	0.0068868	0.237258	0.00492071	0.0348789	0.0161688	0.000770059	0.07114	0.0297376	0.000229697
1446316_at	LPIN2	lipin 2	0.0103954	2.23595e-06	0.00184284	0.023179	0.0431092	0.00643239	0.00431274	0.00297089	0.0193915	3.68128e-05	0.00908688	0.0324737	0.00173382	0.0106236	0.0164895	0.000913817
1446675_at	adk	adenosine kinase	0.0269424	0.00151169	0.00102698	0.0253847	0.00822673	0.00942593	4.96215e-05	0.0115986	0.0523151	0.00115253	0.0228343	0.0233383	0.00149485	0.0441522	0.322305	0.0134882
1447090_s_at	arl1	ADP-ribosylation factor-like 1	0.431146	0.000616774	0.00174	0.086689	0.0422684	0.000805183	0.000496275	0.00786461	0.0321913	0.000801949	0.0442878	0.761625	0.0199781	0.0599013	0.287221	0.00605478
1447096_at	LOC676870	pre B-cell leukemia transcription factor 1; region containing RIKEN cDNA 2310056B04 gene; pre B-cell leukemia transcription factor 1	0.231846	0.00695455	0.0756725	0.265335	0.0458503	0.130309	0.016608	0.0220448	0.144463	0.0039791	0.131577	0.0472189	0.00477833	0.484958	0.108334	0.00134938
1447227_at	SLC40A1	solute carrier family 40 (iron-regulated transporter), member 1	0.615653	0.31983	0.00960381	0.523458	0.0297363	1.34829e-06	0.00190849	0.0164377	0.311106	0.00199272	0.0457748	0.977043	0.00821293	0.0448777	0.0913501	0.00233327
1447277_s_at	PCYOX1	prenylcysteine oxidase 1	0.249413	0.000303549	0.00042484	0.0291183	0.00581233	0.000125318	0.0017963	0.0113544	0.0824936	0.00143588	0.512821	0.451623	0.0212562	0.0608223	0.246569	0.0101371
1447285_at	iigp1	interferon inducible GTPase 1; interferon-inducible GTPase-like	0.110374	0.00318927	0.00667397	0.165374	0.0102033	0.00182718	0.00255107	0.00813049	0.0309782	0.000692509	0.0122647	0.962119	0.00459952	0.0233912	0.0313568	0.000213827
1447344_at	RBM25	RNA binding motif protein 25	0.0105187	0.000797792	0.00137667	0.0222209	0.080028	0.000640449	0.0071356	0.00383065	0.0114674	0	0.00734185	0.0144892	0.000919718	0.0192474	0.0115692	0.000627021
1447364_x_at	MYO1B	myosin IB	0.824368	0.00341051	0.000845648	0.163128	0.17857	0.00604157	0.00706973	0.0805984	0.46418	0.000634813	0.517041	0.709106	0.00536547	0.607992	0.837441	0.00125302
1447567_at	D130007H15Rik	RIKEN cDNA D130007H15 gene	0.0158907	8.37161e-06	0.000614363	0.0154605	0.0084516	0.0327809	0.0250615	0.00518801	0.115368	0.00619304	0.118	0.0252179	0.000842784	0.0567213	0.51055	0.00951537
1447693_s_at	NEO1	neogenin	0.0182629	2.24927e-05	0.00098369	0.0385918	0.12323	0.00036128	0.000342844	0.00846473	0.213102	0.00618302	0.52487	0.0218294	1.56475e-05	0.0181212	0.0439464	0.000405302
1447774_x_at	5730469M10Rik	RIKEN cDNA 5730469M10 gene	0.0315755	0.00072908	0.00109384	0.0224629	0.00720921	0.00138254	7.14508e-05	0.0055962	0.0330443	0.00484767	0.128398	0.259994	0.0193145	0.0233213	0.0489678	0.000920532
1447845_s_at	Vnn1	vanin 1	0.0220764	8.34184e-08	0.00069003	0.0343441	0.0146962	0.0189155	0.0292018	0.00943357	0.0267161	0.00310413	0.204955	0.207012	0.00299538	0.0287807	0.0167423	0.000396277
1447891_at	1447891_at	--	0.0427222	0.031485	0.00223863	0.0299112	0.0166793	0.00086212	0.00130949	0.0067344	0.387543	0.00332399	0.0208025	0.0162386	0.00129955	0.0220889	0.0142116	0.000436663
1447909_s_at	Selk	selenoprotein K; similar to Selenoprotein K	0.0211522	0	0.000534344	0.0112605	0.00412861	0.00145522	0.00306386	0.00440784	0.0106602	0.000481396	0.00750777	0.115784	0.00387952	0.059234	0.0241669	0.000213906
1447927_at	Mpa2l	macrophage activation 2 like	0.0162143	6.28411e-06	0.000483277	0.0177493	0.0184837	0.00478323	0.00187006	0.0131704	0.0536723	0.00288689	0.0275107	0.651463	0.00520453	0.0181245	0.0302498	0.00164475
1449668_s_at	FNIP1	folliculin interacting protein 1	0.955866	0.00935562	0.00377709	0.253257	0.142105	0.0144611	0.0175353	0.146898	0.981635	0.00769022	0.975732	0.854603	0.114675	0.968187	0.883431	0.121555
1452700_s_at	KBTBD7	kelch repeat and BTB (POZ) domain containing 7	0.157455	5.99811e-05	0.000762411	0.0242625	0.0106059	0.000694216	0.00144567	0.00537511	0.0656183	0.00097982	0.0256454	0.49251	0.0185871	0.0195906	0.0435973	0.000755314
1452821_at	Tial1	Tia1 cytotoxic granule-associated RNA binding protein-like 1	0.31665	0.00104605	0.000511736	0.0332457	0.00553733	0.000187677	0.000249456	0.00973407	0.0279703	3.3721e-05	0.0133923	0.675358	0.0110206	0.0351236	0.117742	0.00129505
1452867_at	COL4A3BP	collagen, type IV, alpha 3 (Goodpasture antigen) binding protein	0.99904	0.0532874	0.0078948	0.963029	0.0499692	0.056408	0.0932245	0.868619	0.999962	0.00330729	0.999706	1	0.00708936	0.990741	0.921782	0.109005
1452915_at	PRKAR2A	protein kinase, cAMP dependent regulatory, type II alpha	0.148452	6.69594e-05	0.000921018	0.0323791	0.0353829	0.0019182	0.00409453	0.00333666	0.0351454	0.000516115	0.0139223	0.204339	0.00626212	0.0176796	0.0925392	0.00160868
1452918_at	D19Ertd737e	DNA segment, Chr 19, ERATO Doi 737, expressed	0.789032	0.00633256	0.00431687	0.755852	0.136486	0.000321763	0.00138601	0.0594556	0.797935	0.00175024	0.172503	0.95319	0.00630566	0.523981	0.88903	0.0196771
1452944_at	AFMID	arylformamidase	0.0131108	0.000684156	0.000515336	0.00953261	0.00466269	0.000874601	0.00908621	0.00443698	0.0182194	0.00149471	0.0294431	0.0111625	0.00176688	0.0463315	0.0118832	0.00015102
1452953_at	fam18b	hypothetical protein LOC100045386; family with sequence similarity 18, member B	0.925774	0.00229745	0.00501254	0.645183	0.0464016	9.34668e-06	0.00580756	0.0294017	0.277328	0.00353863	0.361897	0.99799	0.00332276	0.738903	0.947332	0.0208015
1452973_at	Ppm1k	protein phosphatase 1K (PP2C domain containing)	0.804187	0.0119484	0.0050329	0.354177	0.0628738	0.00852226	0.078757	0.0370451	0.158075	0.0177833	0.0992931	0.968025	0.00127797	0.36974	0.742305	0.0045013
1452975_at	AGXT2L1	alanine-glyoxylate aminotransferase 2-like 1	0.0442893	0.00055941	0.000934054	0.0162873	0.00396428	0.00298383	0.0420454	0.00290452	0.0103284	0	0.00917419	0.0127391	0.000901401	0.0100172	0.0167452	0.00077383
1453028_at	PWWP2A	PWWP domain containing 2A	0.468781	0.00682505	0.00442302	0.774536	0.0518577	0.00125982	0.0550063	0.0689992	0.98364	0.00256086	0.216595	0.823372	0.196585	0.953473	0.976223	0.00366548
1453080_at	Apol7a	apolipoprotein L 7a	0.0156588	0.00105693	0.00107835	0.0149522	0.0175204	0.00120532	0.00148324	0.00469565	0.0198983	1.99711e-17	0.0504697	0.0133591	0.00079356	0.0104269	0.010273	0.000529951
1453120_at	TMX4	thioredoxin-related transmembrane protein 4	0.754999	0.00108497	0.00145382	0.431683	0.0416504	0.000277747	0.000624715	0.014663	0.137849	0.000697121	0.0459562	0.925	0.00260434	0.0671254	0.322045	0.00492971
1453139_at	NUDT12	nudix (nucleoside diphosphate linked moiety X)-type motif 12	0.507532	0.0114509	0.00226977	0.124017	0.0156913	0.000670194	0.00205009	0.00886542	0.0977087	0.00281206	0.103973	0.91455	0.00345913	0.0369535	0.0948248	0.00317763
1453282_at	cxadr	coxsackie virus and adenovirus receptor	0.0152464	0.000500912	0.000451539	0.0135953	0.00547899	0.0018951	0.00413651	0.00421222	0.0375606	0.000168019	0.00796921	0.189633	0.0078677	0.0128707	0.0355599	0.00108634
1453304_s_at	Ly6e	lymphocyte antigen 6 complex, locus E	0.0126937	0.000546533	0.000854637	0.0153001	0.0048916	0.00214834	0.00360502	0.00751084	0.0141214	0.000459674	0.00970773	0.231849	0.00354712	0.0127044	0.012113	0
1453313_at	SESN3	sestrin 3	0.0125011	0.00345727	0.0519552	0.295682	0.0487832	0.000883411	0.00139829	0.00387388	0.0179995	0.000226245	0.0136786	0.0141091	0.00039917	0.0130483	0.0142318	0
1453397_at	9130016M20Rik	RIKEN cDNA 9130016M20 gene	0.897368	0.00284732	0.000535353	0.167511	0.690925	0.00212428	0.0029866	0.0726358	0.559729	0.00597241	0.471678	0.935719	0.0415793	0.404057	0.584326	0.00544484
1453487_at	dhdh	dihydrodiol dehydrogenase (dimeric)	0.0298051	0.00464899	0.000108735	0.0242004	0.00929103	0.00101783	0	0.00346553	0.0160464	0.000523697	0.0162313	0.128182	0.00459457	0.0143728	0.0452739	0.00121059
1453588_at	CAR3	carbonic anhydrase 3	0.0288675	0.276814	0.0203008	0.62157	0.0211445	0.00386216	0.0029974	0.00684234	0.0394542	0.00155078	0.0290354	0.973601	0.0126115	0.0378174	0.0339797	0.000636479
1453684_s_at	ZC3H15	predicted gene 5909; zinc finger CCCH-type containing 15	0.916872	0.00465392	0.00417179	0.931296	0.0863768	0.00372148	0.00840653	0.0687935	0.99054	0.0107979	0.268029	0.98593	0.0234381	0.979582	0.993859	0.00423144
1453698_at	6030451C04Rik	RIKEN cDNA 6030451C04 gene	0.0188455	0.00143324	0.000498497	0.0172667	0.0124435	0.00601102	0.00673871	0.00362372	0.0171909	0.00140402	0.0603439	0.175961	0.00655553	0.0184338	0.0239893	0.000903573
1453726_s_at	2810407C02Rik	RIKEN cDNA 2810407C02 gene	0.934908	0.00850087	0.00717065	0.890619	0.307836	0.00391204	0.00959599	0.156719	1	0.00239288	0.803737	0.687123	0.425092	0.999769	0.991197	0.0123213
1453949_s_at	Lypla1	lysophospholipase 1	0.0809462	0.000816859	5.84274e-05	0.0262951	0.0243191	0.00078486	0.00138641	0.00791397	0.0870137	0.000895061	0.00897459	0.0367134	0.00446867	0.021825	0.0211367	0.000677398
1454617_at	arrdc3	arrestin domain containing 3	0.0139938	0.000467989	0.000387562	0.0141882	0.00548871	0.00419024	0.00178093	0.00224451	0.0171694	0.000782773	0.0854549	0.428188	0.0280321	0.0142177	0.0387789	0.00142444
1454649_at	srd5a1	steroid 5 alpha-reductase 1	0.066911	0.00195563	0.00352363	0.114153	0.00864101	0.00417753	0.0444943	0.0069331	0.0609786	0.935731	0.0344989	0.0239112	0.00166814	0.0279951	0.0562203	0.00172172
1454666_at	LOC100046855	Kruppel-like factor 3 (basic); similar to BKLF	0.216782	0.000786528	0.00280805	0.25247	0.0180509	0.000662099	0.000880458	0.00610182	0.0802127	0.00187979	0.0140247	0.542749	0.244283	0.0395574	0.0240961	0.000652842
1454671_at	INSIG1	insulin induced gene 1	0.0156217	2.51642e-14	0.000900623	0.0157066	0.0278065	0.00230713	0.0031684	0.00268254	0.0196174	0	0.107009	0.285478	0.00139343	0.0310586	0.0150925	0.000766971
1454740_at	MIB1	mindbomb homolog 1 (Drosophila)	0.998404	0.0068338	0.00520944	0.543211	0.225382	0.00402319	0.00474456	0.150859	0.987553	0.00483939	0.984565	0.987951	0.0326389	0.987838	0.974524	0.0313195
1454774_at	Zfp445	zinc finger protein 445	0.122305	0.00183139	0.000386693	0.246851	0.0158641	3.05396e-05	0.00156509	0.00792409	0.0726296	0.00578526	0.0373891	0.839199	0.131498	0.0785202	0.397264	0.00544987
1454795_at	Cobll1	Cobl-like 1	0.338991	0.0168402	0.00512093	0.292842	0.0318322	0.000417258	4.70396e-05	0.00806894	0.106593	0.000241765	0.117136	0.564956	0.09043	0.129382	0.128351	0.00116412
1454799_at	AGPAT9	1-acylglycerol-3-phosphate O-acyltransferase 9	0.0138357	0.00115336	0.00122009	0.0155312	0.00410393	0.00122817	0.00536629	0.00292813	0.0113345	0.000929457	0.00708373	0.0193251	0.00158337	0.0251436	0.0104705	0.000532845
1454834_at	NFIB	nuclear factor I/B	0.752433	0.0177509	0.00186575	0.910373	0.0881351	0.00170581	0.00742836	0.326387	0.802203	0.00646396	0.783295	0.997441	0.00396668	0.643437	0.718355	0.170954
1454948_at	Usp7	ubiquitin specific peptidase 7	0.120845	0.000980372	0.00197044	0.0792103	0.0154391	0.000756612	0.00141652	0.000441396	0.0444256	0.000641992	0.00927197	0.156445	0.0170507	0.0179548	0.0224008	6.93828e-05
1454995_at	DDAH1	dimethylarginine dimethylaminohydrolase 1	0.579198	0.0117757	0.000918024	0.0229835	0.00812837	0.00202861	0.00205115	0.00542403	0.0329184	0.00799103	0.271698	0.0223214	2.75684e-05	0.0832503	0.0264191	0.000789088
1455024_at	Tlk1	similar to tousled-like kinase 1; tousled-like kinase 1	0.999385	0.0052826	0.00425207	0.996567	0.0749529	0.00578474	0.00907284	0.850743	1	0.0231758	0.993896	0.999596	0.0168295	0.999985	0.993654	0.0139764
1455029_at	kif21a	kinesin family member 21A	0.974841	0.00251661	0.00364605	0.760346	0.0870826	0.00156079	0.00644751	0.0315414	0.987351	0.386	0.630896	0.891149	0.102791	0.818433	0.987495	0.00255574
1455052_a_at	2410129H14Rik	RIKEN cDNA 2410129H14 gene	0.140124	0.00153684	0.000314522	0.117318	0.0393809	0.000935728	0.00106567	0.00878783	0.110296	0.00373905	0.135208	0.851909	0.0271685	0.0744306	0.507373	0.0285493
1455083_at	ATP11C	ATPase, class VI, type 11C	0.0937507	9.90266e-05	0.000144615	0.0149288	0.00994264	0.00445001	0.00196791	0.00474058	0.0244759	0.000147144	0.0170213	0.25569	0.0162545	0.021968	0.145159	0.00548313
1455234_at	B3galt1	UDP-Gal:betaGlcNAc beta 1,3-galactosyltransferase, polypeptide 1	0.0114168	0.0192786	0.0312559	0.123596	0.0415537	0.000656233	0.00105669	0.00307758	0.0175584	0.000560217	0.0106609	0.0537706	0.00215162	0.0131858	0.0118592	0.000668858
1455240_x_at	Gm7969	predicted gene 7969	0.0244743	0.000845313	0.000798564	0.0175715	0.00724505	0.00116966	0.00161098	0.0116404	0.0733901	1	0.0233	0.0189314	0.00123965	0.0181963	0.0278603	8.89397e-07
1455244_at	DAAM1	dishevelled associated activator of morphogenesis 1	0.199639	0.00401596	0.00137533	0.0699203	0.014525	0.00105642	0.00175613	0.00269836	0.0888816	0.000993247	0.106192	0.996002	0.000218396	0.0259999	0.0356731	0.00107067
1455317_at	EPC2	enhancer of polycomb homolog 2 (Drosophila); similar to Enhancer of polycomb homolog 2	0.14415	0.00459483	0.00618845	0.315759	0.0317996	0.00206693	0.00117428	0.00469099	0.051716	6.64767e-05	0.0487765	0.928129	0.00868278	0.180803	0.319756	0.00679559
1455324_at	PLCXD2	phosphatidylinositol-specific phospholipase C, X domain containing 2	0.036221	0.000656003	0.000510455	0.0101599	0.00544123	0.00957686	0.00209147	0.00315716	0.0177581	0.000780666	0.0502859	0.0175063	0.00164873	0.0111154	0.00966181	0.000525965
1455340_at	DENND5B	DENN/MADD domain containing 5B	0.99515	0.00525325	0.00491672	0.981787	0.0994401	0.00529428	0.00912118	0.240167	0.999168	0.0110901	0.992325	0.990319	0.0421086	0.981233	0.982298	0.0272545
1455383_at	1455383_at	--	0.0213989	3.51066e-05	0.000264966	0.0171101	0.00731336	0.0627057	0.00637404	0.00783312	0.629605	0.022473	0.040012	0.0172442	0.00126661	0.0165664	0.016295	0.000584456
1455396_at	Atp8b1	ATPase, class I, type 8B, member 1	0.268755	0.001919	0.00124087	0.137601	0.0333048	1.21601e-05	0.00194043	0.0114848	0.0949358	0.00113733	0.0475857	0.987127	0.0044547	0.0326613	0.0279555	0.00102147
1455400_at	DDAH1	dimethylarginine dimethylaminohydrolase 1	0.438827	0.000607695	3.76713e-05	0.0172893	0.0056831	0.00114238	0.000841682	0.0039736	0.0178281	0.00153221	0.0422454	0.0220523	0.00191542	0.0856179	0.0195966	0.000458545
1455418_at	1455418_at	--	0.0474279	0.00299573	0.00251802	0.0837096	0.00649492	0.00288814	0.00210658	0.00411541	0.0161976	0.00181163	0.0409016	0.208582	0.0070426	0.0192431	0.0550892	0.00148088
1455454_at	Akr1c19	aldo-keto reductase family 1, member C19	0.0828186	0.000791068	0.00120952	0.0317752	0.0479823	0.00218211	0.00799562	0.98243	0.0732359	0.00133077	0.0287395	0.101217	0.00523413	0.0248969	0.0190531	0.000123572
1455521_at	Klf12	Kruppel-like factor 12	0.146208	0.000562495	2.08411e-07	0.0124358	0.00534015	0.00752425	0.00340563	0.00359203	0.0140085	0.000282289	0.0571614	0.0249663	0.00103196	0.0135896	0.0133206	0.000545964
1455770_at	tdo2	tryptophan 2,3-dioxygenase	0.0736462	5.40436e-09	3.76456e-05	0.0111732	0.00804048	0.00420535	0.00316601	0.00315897	0.0119802	0.000809708	0.0142103	0.0990414	0.0056881	0.0143543	0.0607966	0.00225797
1455980_a_at	GAS2L3	similar to growth arrest-specific 2 like 3; growth arrest-specific 2 like 3	0.0275178	0.000489978	4.35389e-05	0.0135471	0.0138345	0.0394943	0.0152721	0.00269199	0.0164161	3.65283e-05	0.0576781	0.0257727	0.00139969	0.0110219	0.0164663	0.000833916
1456060_at	maf	similar to c-Maf long form; avian musculoaponeurotic fibrosarcoma (v-maf) AS42 oncogene homolog	0.636284	0.00104186	0.00427159	0.6825	0.109457	0.000242574	0.00221242	0.156619	0.916529	0.00938721	0.732198	0.995906	0.0167059	0.920994	0.842093	0.147415
1456072_at	ppp1r9a	protein phosphatase 1, regulatory (inhibitor) subunit 9A	0.106432	0.0118592	0.00330623	0.877238	0.0331513	0.0027829	0.00284167	0.00778162	0.0441016	0.000476593	0.0201365	0.917293	0.0224318	0.0307947	0.0614596	0.00166761
1456204_at	2010107H07Rik	RIKEN cDNA 2010107H07 gene	0.0549524	0.00030323	0.00409817	0.259196	0.574162	0.000411278	0.000767825	0.134023	0.430734	0.0247307	0.111215	0.0253001	0.000606719	0.0237559	0.0240725	1.70347e-05
1456257_at	FAM126B	family with sequence similarity 126, member B	0.977809	0.0368287	0.00990268	0.847286	0.054867	0.00222503	0.00345712	0.122413	0.871268	0.0661271	0.567082	0.960802	0.0571219	0.950444	0.988351	0.00666513
1456295_at	B230114P17Rik	RIKEN cDNA B230114P17 gene	0.99894	0.0518334	0.00969119	0.489439	0.407334	0.0121288	0.0519058	0.402896	0.999591	0.00140882	0.99987	0.997798	0.00175429	0.993929	0.945152	0.0720792
1456531_x_at	prpf19	PRP19/PSO4 pre-mRNA processing factor 19 homolog (S. cerevisiae)	0.0327282	0.00119568	0.00969585	0.255557	0.831714	0.00134439	0.00241282	0.0834787	0.683979	0.00307229	0.321278	0.034716	2.53745e-06	0.0626981	0.0475034	0.000601477
1456544_at	tmem38b	transmembrane protein 38B	0.459373	0.023275	0.00685592	0.574631	0.103575	0.000983106	0.00153939	0.0248186	0.341412	0.013718	0.130318	0.915091	0.0153402	0.885029	0.91012	0.0273762
1456599_at	NXT2	nuclear transport factor 2-like export factor 2	0.117659	2.62316e-06	0.000330588	0.0378578	0.0475998	0.00080027	0.000466303	0.00804949	0.0632166	0	0.00946611	0.270781	0.00909886	0.0158435	0.0224805	0.000615672
1456607_at	Vcpip1	valosin containing protein (p97)/p47 complex interacting protein 1	0.928956	0.00292419	0.00230826	0.661635	0.23193	0.00342584	0.00455059	0.132136	0.980128	0.00203674	0.922477	0.995776	0.0119244	0.87473	0.840375	0.187897
1456718_at	TMEM56	transmembrane protein 56	0.0313769	0.000536177	0.000552276	0.0152618	0.0100291	3.35286e-05	7.08725e-08	0.00409545	0.0115119	1.24405e-06	0.0397639	0.0505606	0.001186	0.0125452	0.0115778	0.000584852
1456735_x_at	Acpl2	acid phosphatase-like 2	0.01096	0.00350418	0.00771895	0.119816	0.0289706	0.000901907	0.00339723	0.0030396	0.0304135	0.000875964	0.0427742	0.0111516	0.00071643	0.0114987	0.0122142	0.000478976
1456960_at	adk	adenosine kinase	0.0448089	8.7014e-06	0.000482675	0.0100603	0.00726149	0.000684576	0.00285706	0.00332058	0.0104321	0.00110736	0.014003	0.025032	0.00112274	0.0139598	0.0124981	0.000625746
1456986_at	ZBTB16	zinc finger and BTB domain containing 16	0.0097569	0.000542119	0.000570236	0.0160082	0.0105169	0.001011	0.00254678	0	0.0157829	0.00123382	0.00811426	0.00995314	8.6235e-06	0.013913	0.0104724	4.72294e-05
1457027_at	DHTKD1	dehydrogenase E1 and transketolase domain containing 1	0.131415	0.00936473	0.00156689	0.0624366	0.0138931	0.00229154	0.0772824	0.0048272	0.0325463	0.00494452	0.121817	0.0238203	0.001076	0.0306135	0.0657897	0.00172109
1457110_at	PANK1	pantothenate kinase 1	0.016225	0.000237027	0	0.0185193	0.0216573	0.00342973	0.000782147	0.00337776	0.076822	0.0191624	0.477817	0.0556961	0.0093447	0.116417	0.363242	0.0160186
1457141_at	1457141_at	--	0.0203984	0.00197639	0.000571889	0.0219141	0.00641729	0.000581431	0.000385105	0.00421151	0.0282687	0.0031617	0.13033	0.125403	0.00144167	0.0167858	0.0181817	0.000303567
1457263_at	Serpina3k	serine (or cysteine) peptidase inhibitor, clade A, member 3K	0.0240102	0.12769	0.0231682	0.141614	0.00182453	0.00206815	0.00501806	0.00293428	0.0239776	0	0.0128569	0.0551833	0.000840651	0.0274687	0.0181858	0.000565167
1457403_at	9130409I23Rik	RIKEN cDNA 9130409I23 gene	0.0841461	8.26057e-05	0.000599677	0.0103229	0.00419331	0.00123101	0.00304757	0.00489739	0.0163254	0.000525669	0.0114888	0.0139673	0.000828627	0.0220411	0.123504	0.00597726
1457458_at	Zc3h4	zinc finger CCCH-type containing 4	0.300642	0.000479403	0.000792052	0.0346626	0.00918195	0.00040973	0.00920703	0.00481377	0.064214	0.000909281	0.0196072	0.0349202	0.00296753	0.391008	0.330018	0.00500472
1457601_at	il1rap	interleukin 1 receptor accessory protein	0.0871852	7.44182e-05	4.84239e-05	0.0175816	0.0192654	0.00150326	9.94675e-05	0.00188285	0.0250099	0.000518973	0.139257	0.12387	0.0008116	0.0308654	0.364978	0.0321258
1457635_s_at	NR3C1	nuclear receptor subfamily 3, group C, member 1	0.641592	0.00158523	0.00100552	0.191659	0.130978	0.00111499	0.00273289	0.0425409	0.975298	0.00441392	0.984133	0.940958	0.0385691	0.468717	0.799702	0.0200885
1457644_s_at	CXCL1	chemokine (C-X-C motif) ligand 1	0.0118364	0.017188	0.00017338	0.0121425	0.00405827	0.000722757	0.00100788	0.00501492	0.020698	0.00077756	0.00634001	0.0104829	0.00128364	0.0195473	0.029505	0.0031817
1457670_s_at	lmna	lamin A	0.160354	0.0101706	0.00438857	0.11156	0.743161	0.00157121	0.00328226	0.00745154	0.623203	0.0163902	0.0988905	0.0218146	0.000367293	0.0401067	0.091827	0.000972292
1457721_at	PPARA	peroxisome proliferator activated receptor alpha	0.0385052	0.00882462	0.00204853	0.138973	0.0162967	0.00184234	0.00231275	0.00586005	0.036137	0.00266191	0.249562	0.0353684	0.992826	0.0274747	0.0251312	0.00027724
1458089_at	FKBP5	FK506 binding protein 5	0.0234181	0.00077542	0.00105398	0.0266049	0.00474226	0.0017436	0.00104694	0.00409954	0.0271101	0.000596285	0.00770069	0.0157495	0.00132078	0.0138205	0.0209342	0.00108697
1458099_at	1458099_at	--	0.0333031	0.00146957	0.000736745	0.0208688	0.00384386	0.000123508	0.00261719	0.00321608	0.0122722	0.000506585	0.0139024	0.121983	0.00361626	0.0196719	0.0148292	0.000886184
1458299_s_at	Nfkbie	nuclear factor of kappa light polypeptide gene enhancer in B-cells inhibitor, epsilon	0.0106011	0.000769165	0.000639691	0.0110716	0.0132939	0	0.0160044	0.00495793	0.0163209	0.000919951	0.0132526	0.0106167	9.32743e-10	0.0215956	0.0102955	0.000515443
1458327_x_at	slc26a1	solute carrier family 26 (sulfate transporter), member 1	0.0237847	0.00428194	0.00585122	0.0927271	0.0193403	1	0.00174186	0.00474261	0.0179933	0.000776897	0.0186028	0.0186836	0.00130184	0.0463935	0.047821	0.001236
1458345_s_at	COLEC11	collectin sub-family member 11	0.0117999	0.00148185	0.0126558	0.198185	0.0165094	6.57099e-32	0.00566522	0.00908198	0.0148838	0.000180331	0.062642	0.0658543	0.00101786	0.0118008	0.0162466	0.000635015
1458442_at	AI132709	expressed sequence AI132709	0.018386	0.00270429	0.000464895	0.0186773	0.00757545	0.000555312	0.00193807	0.0113948	0.0491211	0.0006497	0.0130281	0.0382189	0.000773089	0.0240293	0.0212233	0
1458829_at	Fbp1	fructose bisphosphatase 1	0.0292208	0.00129955	0.00073844	0.0249777	0.0114723	0.00608844	0.0018494	0.0085836	0.0213501	1	0.0165948	0.021886	0.000320821	0.022319	0.0207825	0.00102919
1458832_at	GHR	growth hormone receptor	0.128571	0.000540238	0.000753859	0.020487	0.00610884	0.000383183	0.00219172	0.00463567	0.024567	0.000461431	0.0172225	0.536097	0.00551094	0.0233034	0.0205593	0.000578869
1458947_at	2010111I01Rik	RIKEN cDNA 2010111I01 gene	0.0292654	0.00705706	0.000247511	0.182447	0.570504	0.00157135	0.00202251	0.007678	0.0285843	1	0.196819	0.0305732	0.000676715	0.0252199	0.02641	0.000833036
1459030_at	BBOX1	butyrobetaine (gamma), 2-oxoglutarate dioxygenase 1 (gamma-butyrobetaine hydroxylase)	0.925999	0.00771728	0.00210179	0.103889	0.0285956	0.00021856	0.013546	0.0114612	0.119605	0.00915412	0.888577	0.676507	0.00970845	0.128082	0.155018	0.001999
1459141_at	1810008I18Rik	RIKEN cDNA 1810008I18 gene	0.0382424	0.00582276	0.00188757	0.222518	0.0113147	0.000580503	0.177504	0.00682584	0.029608	0.00110687	0.0871422	0.935276	0.015957	0.0270081	0.0242136	0.00067805
1459187_at	9330161A08Rik	RIKEN cDNA 9330161A08 gene	0.0383402	0.000932861	0.000484109	0.0418294	0.0074959	0.00115313	0.0010139	0.00924516	0.0229292	0.000100715	0.0304191	0.496785	0.0755141	0.0403957	0.0385157	0
1459253_at	arrdc3	arrestin domain containing 3	0.0403873	1.0422e-05	0.00102546	0.0158438	0.013713	0.00869684	0.0061726	0.00304559	0.0208315	0.000296982	0.0387748	0.231698	0.0276208	0.0315787	0.25751	0.00395393
1459488_at	ZC3H13	zinc finger CCCH type containing 13	0.0249957	0.0583525	0.0535041	0.0388477	0.0109542	0.00160271	0.00214254	0.00590051	0.0275749	0.000449922	0.102983	0.0202336	0.00135682	0.0263264	0.0243396	2.89658e-07
1459557_at	ZBTB16	zinc finger and BTB domain containing 16	0.0137612	0.000721935	4.37267e-05	0.0438591	0.0350291	1.52101e-07	0.00173053	0.00587338	0.0619375	0.00448783	0.0135388	0.011919	0.000852227	0.0127842	0.0115137	0.000699197
1459679_s_at	MYO1B	myosin IB	0.958213	0.00239032	0.00298923	0.933276	0.0918129	0.015239	0.00600764	0.201002	0.991096	0.00444987	0.875147	0.972844	0.0174748	0.994128	0.99622	0.0071547
1459747_at	1459747_at	--	0.031399	0.0234952	0.55299	0.967544	0.0239537	0.00573153	0.00128293	0.0177283	0.045537	0.000987686	0.0959725	0.199759	0.00128268	0.0442485	0.0632461	0.00148785
1459793_s_at	LYRM5	LYR motif containing 5	0.0533188	0.000793882	4.99847e-05	0.0193088	0.203612	0.00117978	0.00135927	0.00432696	0.0156685	0.00115947	0.0733645	0.048668	0.000114246	0.0151465	0.032839	0.000309222
1459835_s_at	Gm15542	predicted gene 15542; predicted gene 7816; similar to DnaJ-like protein; predicted gene 6335; DnaJ (Hsp40) homolog, subfamily A, member 1, pseudogene; DnaJ (Hsp40) homolog, subfamily A, member 1	0.719497	0.0267183	0.00206818	0.0701505	0.0239338	0.000990766	0.000625528	0.00496044	0.0416626	0.00271608	0.16644	0.679172	0.0121522	0.028149	0.0463452	0.00110921
1459854_s_at	DYNLT3	dynein light chain Tctex-type 3	0.142051	0.000698701	0.000549414	0.014556	0.0102568	0.000959984	0.00104698	0.0050002	0.0222265	0.000202299	0.0373587	0.302636	0.0047604	0.022212	0.142792	0.00643488
1459860_x_at	trim2	tripartite motif-containing 2	0.0643273	0.00151892	0.00180113	0.0272392	0.0101986	0.00125403	4.58507e-06	0.00404724	0.0297226	0.00219648	0.157021	0.114801	0.00149632	0.0181939	0.0187743	0.000601743
1459937_at	ASS1	argininosuccinate synthetase 1	0.0115786	0.000547313	0.000659778	0.0200265	0.00997439	0.0143782	0.00115401	0.00277603	0.0194204	0.000468887	0.00621036	0.0413411	0.00360309	0.0124061	0.0150709	0.000719535
1459948_at	GHR	growth hormone receptor	0.0782051	0.000847174	0.000710444	0.0350571	0.00849061	0.00103978	0.00212729	0.00440423	0.0248269	0.00122428	0.021008	0.0344415	0.00215548	0.029501	0.0726647	0.00252882
1459973_x_at	DPP4	dipeptidylpeptidase 4	0.0334578	0.000146192	0.000611354	0.0141974	0.00484229	0.00109349	0.0113056	0.00429414	0.0498139	0.00106189	0.124471	0.0253823	0.0045005	0.0147953	0.0144776	1.95682e-05
1459976_s_at	Gm8566	predicted gene 8566; superoxide dismutase 1, soluble; similar to Superoxide dismutase	0.027799	0.000918829	0.00168526	0.107682	0.748464	0.000849171	0.00218683	0.0291436	0.61745	0.0323013	0.223878	0.0258975	0.0011726	0.0282516	0.0972876	0.00253873
1459984_at	MIA3	melanoma inhibitory activity 3	0.0202335	0.000879205	0.000921758	0.0228795	0.00804304	0.00178055	0.00172682	0.00620638	0.0287637	0.00173536	0.0136462	0.085154	0.00680477	0.0204915	0.0287375	0.000978944
1460506_s_at	LOC675851	NADH dehydrogenase (ubiquinone) 1, subcomplex unknown, 2; similar to NADH dehydrogenase (ubiquinone) 1, subcomplex unknown, 2	0.0139831	0.000707273	0.00162296	0.0457769	0.0136692	4.18023e-05	0.00106403	0.00810089	0.0136053	0.000856346	0.0342949	0.0172821	0.00109988	0.0188296	0.0283834	0.00135814
1460509_at	B3galt1	UDP-Gal:betaGlcNAc beta 1,3-galactosyltransferase, polypeptide 1	0.0160836	0.069243	0.124349	0.232358	0.0342555	0.000619244	0.00133906	0.000712085	0.0780141	0.000240624	0.0247984	0.115214	7.09118e-05	0.0176324	0.0162411	8.9115e-05
1460563_at	LOC100047601	similar to DNA segment, Chr 10, ERATO Doi 438, expressed	0.961887	0.00409306	0.006047	0.909494	0.262487	0.00161637	0.0093738	0.340026	0.983921	0.00362372	0.838868	0.954234	0.0742042	0.934323	0.993405	0.00324962
1460603_at	SAMD9L	sterile alpha motif domain containing 9-like	0.0170647	0.00551546	0.00118624	0.0613685	0.00755854	0.0144659	0.00753272	0.00553833	0.026819	0	0.0113414	0.792661	0.0154748	0.0201932	0.0228052	0.00105487
1460606_at	Hsd17b13	hydroxysteroid (17-beta) dehydrogenase 13	0.396777	0.000872182	0.00334623	0.89571	0.0283366	0.815807	0.0107388	0.0327035	0.900024	0.01019	0.531447	0.926908	0.0858523	0.805013	0.968479	0.00275161
1460624_at	6330564D18Rik	RIKEN cDNA 6330564D18 gene	0.351972	0.00104118	0.00512224	0.831893	0.0158363	0.00292263	0.000774354	0.0190797	0.325317	0.000641977	0.219683	0.952798	0.00408909	0.750233	0.726958	0.00706656
AFFX-18SRNAMur/X00686_3_at	Rn18s	18S RNA	0.041974	0.00288588	0.0021122	0.0822006	0.0125439	0.00416836	0.00157542	0.00786583	0.0165005	0.000393251	0.0101842	0.569772	0.00333852	0.0156385	0.0157177	0
AFFX-18SRNAMur/X00686_5_at	Rn18s	18S RNA	0.0263714	0.00307194	0.00143412	0.0601509	0.00646572	0.00555214	0.002568	0.00592686	0.0174004	0.000445746	0.00989726	0.439449	0.00120135	0.0184133	0.0141736	0
AFFX-18SRNAMur/X00686_M_at	Rn18s	18S RNA	0.0227069	0.00092545	0.000529422	0.0160016	0.00565632	0.0013913	0.00384533	0.01668	0.0223328	0.000733823	0.00621701	0.3179	0.00214333	0.0207745	0.0126557	0
AFFX-MURINE_b1_at	BC1	brain cytoplasmic RNA 1	0.0118925	0.000695448	0.000189173	0.130341	0.444744	0.00085992	0.00738184	0.00603891	0.148134	0.00636	0.174284	0.020682	0.000608779	0.0159294	0.0184621	0.000386233
AFFX-PyruCarbMur/L09192_MB_at	Pcx	pyruvate carboxylase	0.0176117	0.000782906	4.03342e-07	0.0154688	0.00532128	0.00132707	0.00128705	0.00286443	0.0136851	0	0.00722818	0.0417002	0.0041182	0.054278	0.0119064	0.000598436
AFFX-r2-Ec-bioB-M_at	bioB	Biotin synthase	0.0118009	0	0.00116284	0.0394643	0.0362159	0.000112728	0.00322164	0.00827265	0.10109	0.00676687	0.126529	0.024552	2.08417e-05	0.0235845	0.012015	0.000476508
