# Supplementary material for: Bayesian Detection of Expression Quantitative Trait Loci Hot Spots
Source: Oxford University Press journal article supplement (doi:10.1534/genetics.111.131425), 2011-09-17
Supplement: tables2.xlsx [file tables2.xlsx]

## Sheet: Sheet1
Table S2 Proportion of transcripts found to be associated with each regulatory hot-spot (Marker). For comparison, regulatory hot-spots detected by our method is matched up to markers identified in Kendziorski et al. (2006), Chun and Keles (2009) and Jia and Xu (2007). +, found by other method. -, not found by other method. The hot-spots identified by HESS (with a proportion of associated transcri…
			MOM	BAYES	SPLS
Marker	Posterior tail probability	Proportion of associated transcripts (Post. Prob. Incl. > 0.95)	Kendziorski et al. 20061	Jia and Xu 2007	Chun and Keles 2009
D13Mit91	1	0.141132	+	-	-
D15Mit63	1	0.134774	-	+	+
D18Mit9	1	0.106167	-	-	-
D18Mit202	1	0.0972664	-	-	-
D3Mit19	1	0.0839161	-	+	-
D4Mit237	1	0.0731087	+	-	-
D13Mit36	1	0.0330579	-	-	-
D13Mit16	1	0.0120788	-	-	-
D9Mit249	1	0.00699301	-	-	-
D13Mit66	0.9266	0.00508582	-	-	-
D4Mit186	1	0.00381437	-	-	-
D5Mit240	0.994	0.00190718	-	-	+
D4Mit149	0.909	0.000635728	-	+	-
D4Mit2	0.852	0.000635728	-	-	-
D15Mit107	0.9897	0.000635728	-	-	-
D18Mit103	0.8448	0	-	-	-
1 The results reported in Kendziorski et al. (2006) refer to analysis of all probe sets (n = 45,265)
