# Supplementary material for: Bayesian Detection of Expression Quantitative Trait Loci Hot Spots
Source: Oxford University Press journal article supplement (doi:10.1534/genetics.111.131425), 2011-09-17
Supplement: tables3.xlsx [file tables3.xlsx]

## Sheet: en
Table S3 Marker-transcript associations for all probe sets (q = 648) in the Gutenberg Heart Study (GHS) monocytes population. For each probesets the Bayes Factor is reported for the identified hot-spots (rs9557207, rs11616269). We also indicated whether a gene was a predicted target in GHS (target ghs), Cardiogenics (target cardio) or both populations (target both), or it was included by expansio…
Probe set ID	Gene Symbol	rs9557207	rs11616269	IRF7 targets
ILMN_1651680	LOC644604	1.37431	0.346495	expanded ghs
ILMN_1652412	PHKB	0.666918	1.99594	expanded both
ILMN_1652722	C14orf2	0.114957	0.139901	expanded ghs
ILMN_1652753	PAAF1	1.74093	3.92093	expanded ghs
ILMN_1652806	ATP5J	0.0585231	0.151185	expanded ghs
ILMN_1653026	PLAC8	4.51175	0.0827575	expanded ghs
ILMN_1653143	ECD	1.10697	2.0903	expanded ghs
ILMN_1653367	TAF12	10.0438	0.616595	expanded ghs
ILMN_1654560	TLR1	3.1217	0.308145	expanded ghs
ILMN_1654639	HERC6	2.01721	0	expanded both
ILMN_1654819	ZNF589	1.41357	1.12438	expanded ghs
ILMN_1655206	ZBTB34	0	16.8886	expanded ghs
ILMN_1655497	EIF4B	0	0.258231	expanded ghs
ILMN_1655561	ARPC3	2.46248	0.260797	expanded ghs
ILMN_1655635	METTL3	1.67968	0.752229	expanded ghs
ILMN_1655935	ADCY7	0.457353	0.654636	expanded ghs
ILMN_1656016	DHX9	11.7653	0.689092	expanded both
ILMN_1656791	RPS6	0.406439	9.21406	expanded ghs
ILMN_1656818	GPR141	0.377575	8.1592	expanded ghs
ILMN_1657423	SPG21	0.0982043	0.095349	expanded both
ILMN_1657871	RSAD2	3.71799	0.0697592	expanded both
ILMN_1658259	DRG1	1.54379	1.37462	expanded ghs
ILMN_1658327	BAZ1A	0	0.782851	expanded ghs
ILMN_1658416	MRPS18C	3.80129	0.905825	expanded ghs
ILMN_1658962	LCP2	0.505093	0.326797	expanded ghs
ILMN_1659255	--	0.0808008	2.38822e-05	expanded ghs
ILMN_1659524	C6orf66	1.19527	0.890665	expanded ghs
ILMN_1659537	--	0.879904	0.885012	expanded ghs
ILMN_1659682	GALK2	3.01264	0.15523	expanded both
ILMN_1659688	LOC100133842	0.075962	0.887522	expanded both
ILMN_1659913	ISG20	0.0631035	0.0767399	expanded both
ILMN_1660663	DYRK1A	2.37992	4.20385	expanded both
ILMN_1660840	PPPDE1	0	0.318161	expanded ghs
ILMN_1661000	RPS6KC1	0.107561	0.163762	expanded ghs
ILMN_1661293	ZNF224	0.296991	1.17292	expanded ghs
ILMN_1661577	MAFA	0.11004	1.83419	expanded ghs
ILMN_1661945	C14orf156	6.36081	0.963718	expanded ghs
ILMN_1662049	AGPAT5	0.190871	0.0730228	expanded both
ILMN_1662128	ISY1	0.0622901	0.0945784	expanded both
ILMN_1662358	MX1	0.484563	0.178211	expanded both
ILMN_1662843	CD53	0.345947	0.360634	expanded ghs
ILMN_1663220	MRPL22	14.8039	0.627785	expanded ghs
ILMN_1663347	OTOF	0.0715653	0.104093	expanded both
ILMN_1663751	CYCS	0.160679	0.34994	expanded ghs
ILMN_1664525	P2RY13	0	2.30523	expanded ghs
ILMN_1664543	IFIT3	5.36931	0.0657188	target both
ILMN_1664560	DYRK1A	0.387964	0.364809	expanded ghs
ILMN_1665004	CASC3	0.0715022	0.246435	expanded ghs
ILMN_1665736	LOC642784	0	0.182608	expanded ghs
ILMN_1665797	CSE1L	0.237138	3.17435	expanded ghs
ILMN_1666156	MORF4L2	3.77502	0.396741	expanded ghs
ILMN_1666192	--	0.0986546	0.175958	expanded ghs
ILMN_1666372	ATP5H	0.183419	0.647813	expanded ghs
ILMN_1666564	LOC100133788	0.562812	0.822699	expanded ghs
ILMN_1666827	C4orf41	0.235057	0.413833	expanded ghs
ILMN_1667925	PDCL3	0.773808	3.11051	expanded ghs
ILMN_1668582	CRBN	0.205972	0.467506	expanded ghs
ILMN_1669062	CCR2	0	0.18797	expanded ghs
ILMN_1669516	ZNF193	0.149604	1.19959	expanded ghs
ILMN_1669555	FAM48A	0.410661	0.506647	expanded ghs
ILMN_1670079	OMA1	0	10.4649	expanded ghs
ILMN_1670305	SERPING1	0	0.716225	expanded both
ILMN_1671237	GNGT2	1.4513	0.0798514	expanded ghs
ILMN_1671516	CIR	0.164914	0.304328	expanded ghs
ILMN_1671905	C10orf78	2.00369	0.438183	expanded ghs
ILMN_1672191	ATP5F1	0.351315	0.859401	expanded ghs
ILMN_1672662	SLC20A1	0	0.300187	expanded ghs
ILMN_1673024	RBM15B	0.0911462	1.06686	expanded ghs
ILMN_1673352	IFITM2	0.133648	0.134399	expanded both
ILMN_1673788	CDV3	0.219018	0.56851	expanded ghs
ILMN_1673960	MAT2B	0.804574	8.55022	expanded both
ILMN_1674063	OAS2	0.792747	0.0882394	target both
ILMN_1674250	NCKAP1L	1.12498e-05	0.0876444	expanded both
ILMN_1674506	MED23	1.32442	2.98709	expanded ghs
ILMN_1674811	OASL	3.33037	0	target cardio
ILMN_1674891	KIAA1618	0.116949	0.19198	expanded ghs
ILMN_1675156	CDC42	0.256391	1.0597	expanded ghs
ILMN_1675640	OAS1	0	0.377621	expanded both
ILMN_1677098	YPEL2	0.0634835	0.115661	expanded ghs
ILMN_1678422	DHX58	0.0935122	0	expanded both
ILMN_1678766	DYNLT1	0.250926	0.761905	expanded ghs
ILMN_1679268	PELI1	0	0.655459	expanded ghs
ILMN_1679382	CCT2	2.80482	0.343231	expanded ghs
ILMN_1680314	TXN	1.018	0.748417	expanded ghs
ILMN_1680644	MIOS	0.341647	0.804303	expanded ghs
ILMN_1680687	NSF	1.02965	2.21987	expanded ghs
ILMN_1680867	--	0.0738419	1.04997	expanded ghs
ILMN_1681101	38776	0.313855	0.163984	expanded ghs
ILMN_1681301	AIM2	0	0.101972	expanded ghs
ILMN_1681721	OASL	1.37614	0.00018915	target cardio
ILMN_1681984	GALNT10	13.5046	0.709034	expanded ghs
ILMN_1682738	SMAD3	4.28462	0.277276	expanded ghs
ILMN_1683178	JAK2	0	0.427044	expanded ghs
ILMN_1683243	VPS45	0.532355	0.453957	expanded ghs
ILMN_1683575	LOC648605	0.886012	0.938579	expanded ghs
ILMN_1683658	FKBP1A	0.124665	0.396428	expanded both
ILMN_1683678	LOC26010	0.579144	0	expanded both
ILMN_1683792	LAP3	2.37604	0.0694566	expanded both
ILMN_1684663	ZDHHC13	0.106579	1.15915	expanded ghs
ILMN_1685327	SON	0.179837	0.372224	expanded ghs
ILMN_1685679	RNF146	0	0.236984	expanded ghs
ILMN_1686283	CECR1	0.0845345	0.183822	expanded both
ILMN_1686664	MT2A	0.273555	0.2067	expanded both
ILMN_1686985	MTM1	0.217602	4.27964	expanded ghs
ILMN_1687384	--	0.241402	0.514582	expanded ghs
ILMN_1687519	SNAP23	0.374164	0.326401	expanded both
ILMN_1687782	RAD17	0.90779	0.200565	expanded ghs
ILMN_1687887	PSMC4	0	0.0929085	expanded ghs
ILMN_1688071	NAT1	0.163608	0.852772	expanded ghs
ILMN_1688606	RNFT1	0	0	expanded both
ILMN_1689518	PECAM1	0.460449	0.376975	expanded ghs
ILMN_1689655	HLA-DRA	16.6252	0.0487729	expanded ghs
ILMN_1689734	IL1RN	0	0.0703989	expanded both
ILMN_1689842	SC4MOL	1.97739	0.25664	expanded ghs
ILMN_1690049	NGDN	5.23234	0.877375	expanded ghs
ILMN_1690063	--	0.201792	0.234904	expanded ghs
ILMN_1690105	STAT1	0.144025	0.155625	expanded both
ILMN_1690241	BATF2	0.389914	0.268517	expanded both
ILMN_1690325	NFYA	0.312743	0.811371	expanded ghs
ILMN_1690911	C16orf87	0	0.161606	expanded ghs
ILMN_1690939	TYMP	0.963495	0.101851	expanded ghs
ILMN_1691156	MT1A	0	0.896888	expanded ghs
ILMN_1691364	STAT1	0	0.100919	expanded both
ILMN_1692168	UBE2Z	1.18963	0.31223	expanded ghs
ILMN_1692546	VNN2	0.28652	0.286276	expanded ghs
ILMN_1693009	FGL2	0.51648	0.188635	expanded ghs
ILMN_1693227	ZC3H7A	1.65289	1.23602	expanded ghs
ILMN_1694323	GLE1	0.437864	8.8946	expanded both
ILMN_1694596	FAR2	0.000416031	0	expanded ghs
ILMN_1694888	TAF2	0	2.13766	expanded ghs
ILMN_1695034	LOC100132528	8.87214	0.0172943	expanded ghs
ILMN_1695404	LY6E	0.0894282	1.01158	expanded both
ILMN_1695485	C9orf109	1.20608	0	expanded ghs
ILMN_1695717	RBM41	0.320381	0	expanded ghs
ILMN_1695868	PRICKLE4	2.82667	0.225075	expanded ghs
ILMN_1696347	CTSC	0.164683	0	expanded ghs
ILMN_1696419	STOM	0.328794	0.101131	expanded both
ILMN_1696420	BRD7	0.28651	0.358818	expanded ghs
ILMN_1696432	IDH1	0.412517	0	expanded ghs
ILMN_1696654	--	0.102671	0.0733672	expanded both
ILMN_1697529	RNF10	0.302304	0.246451	expanded ghs
ILMN_1697597	KIAA0494	0	0.148301	expanded ghs
ILMN_1697710	IL1F7	0	0.153334	expanded both
ILMN_1697742	C3orf38	0.136542	0	expanded ghs
ILMN_1698533	--	0.117746	0.123246	expanded ghs
ILMN_1698621	COG5	0	6.49436	expanded ghs
ILMN_1699331	IFIT1	31.8741	0	target both
ILMN_1699711	DEDD	0.0304788	0.185601	expanded ghs
ILMN_1700044	SAP130	0.38283	1.37078	expanded ghs
ILMN_1700628	DDX24	3.43382	0.429143	expanded ghs
ILMN_1700671	ETV7	0.130655	0.155918	expanded ghs
ILMN_1700950	LOC646567	1.76972	1.74704	expanded ghs
ILMN_1701114	GBP1	0.181687	0.205988	expanded ghs
ILMN_1701293	COX7A2	0.992411	1.16439	expanded ghs
ILMN_1701306	--	1.28242	0.255109	expanded ghs
ILMN_1701613	RARRES3	1.83972	0.0880435	expanded both
ILMN_1701621	SCO2	0.213272	0.437223	expanded both
ILMN_1701711	BRD8	0.104686	1.36339	expanded ghs
ILMN_1701753	LOC644063	0	0.115513	expanded ghs
ILMN_1701789	IFIT3	1.52989	0	target both
ILMN_1702526	C17orf48	0.195134	5.71379	expanded ghs
ILMN_1702585	LOC646817	0.239034	2.28354	expanded ghs
ILMN_1702706	APOBEC3F	0	0.105542	expanded ghs
ILMN_1702837	PSMD1	0.146004	0.196945	expanded ghs
ILMN_1703108	UBE2L6	2.72857	0	expanded both
ILMN_1703132	LYRM2	1.18883	0	expanded ghs
ILMN_1703153	N-PAC	0.149053	0.252359	expanded ghs
ILMN_1703263	SP140	19.026	0.0687561	expanded both
ILMN_1703427	SON	0.0643785	0.187947	expanded both
ILMN_1703538	AIF1	0.256365	0.430192	expanded ghs
ILMN_1703720	SF3B14	15.0469	1.27623	expanded ghs
ILMN_1704084	CMAH	6.20411	0.010409	expanded ghs
ILMN_1704094	PSMA6	0.793618	0.364997	expanded ghs
ILMN_1704290	SPTLC2	0.553135	0.22401	expanded both
ILMN_1704383	TRIM37	0.159482	50.4867	expanded ghs
ILMN_1704972	TRIM5	0.000814993	0.077321	expanded both
ILMN_1705047	TLR8	0.321769	3.06441	expanded ghs
ILMN_1705663	DMXL2	0.69797	5.45424	expanded both
ILMN_1706238	CSE1L	0.337188	1.1816	expanded ghs
ILMN_1706305	COX16	7.82323	0.801857	expanded ghs
ILMN_1706502	EIF2AK2	0.842654	2.996e-06	expanded both
ILMN_1706523	FCGR2A	0.135212	0.131637	expanded both
ILMN_1707236	HCCS	0	0.103857	expanded ghs
ILMN_1707695	IFIT1	2.71374	0.0768386	target both
ILMN_1707783	LOC100130394	1.98886	1.51334	expanded ghs
ILMN_1708619	SEH1L	0.557227	0.203151	expanded ghs
ILMN_1708627	hCG_1781062	3.28993	0.341922	expanded ghs
ILMN_1708672	ACAT2	0.490363	0.199826	expanded ghs
ILMN_1709204	CLEC4A	0.245669	1.39745	expanded ghs
ILMN_1709333	OAS2	25.0018	0.0335028	target both
ILMN_1709348	ALDH1A1	0.0766394	6.74893e-05	expanded ghs
ILMN_1709483	MRE11A	0	0.48989	expanded ghs
ILMN_1709747	EXOG	0.11482	1.08371	expanded ghs
ILMN_1709772	SNX5	0.0789799	0.262639	expanded ghs
ILMN_1710740	C2	0.752926	0.3948	expanded ghs
ILMN_1710844	PARP10	0.046452	39.4674	expanded ghs
ILMN_1710873	ZNF330	0	0.264538	expanded ghs
ILMN_1710937	IFI16	0.733658	0.0875161	expanded ghs
ILMN_1711102	B3GNT2	0.785282	0.348884	expanded both
ILMN_1711702	--	0.195716	2.52373	expanded ghs
ILMN_1711899	ANXA2	44.7262	0.0563496	expanded both
ILMN_1712587	ARSB	0.531408	0	expanded ghs
ILMN_1712634	TIA1	0	2.08111	expanded ghs
ILMN_1713031	PGCP	0.575705	0.306078	expanded ghs
ILMN_1713668	TSNAX	0.207232	0.172572	expanded ghs
ILMN_1713756	GLUD1	0.0641854	0.175947	expanded ghs
ILMN_1714082	CMAS	1.56791e-05	0.133169	expanded ghs
ILMN_1714820	ITGB1	0.420869	2.51939	expanded both
ILMN_1715392	PRPF3	0	0.333041	expanded ghs
ILMN_1715760	LGALS9	0.273981	0.0789044	expanded both
ILMN_1715809	OGFRL1	0	1.0018	expanded ghs
ILMN_1715863	MLKL	0.227351	0	expanded ghs
ILMN_1716026	ARMCX6	2.56099	3.34546	expanded ghs
ILMN_1716086	WDR33	0	85.236	expanded ghs
ILMN_1716336	CKAP5	4.33322	0.422823	expanded ghs
ILMN_1716704	NLRC5	0.0725644	0.084678	expanded both
ILMN_1716821	GORASP1	0.640773	1.16427	expanded both
ILMN_1717154	AQR	0.406678	9.21056e-08	expanded ghs
ILMN_1717490	RPL6P27	8.30702	0.579645	expanded both
ILMN_1717745	TIAL1	0	0.315199	expanded ghs
ILMN_1718353	LOC652455	0.168495	2.43049	expanded ghs
ILMN_1718558	PARP12	0.403066	0.146394	expanded both
ILMN_1719256	CKS1B	23.4275	0.0415233	expanded ghs
ILMN_1719344	NRBF2	0	0	expanded ghs
ILMN_1720048	CCL2	6.5367	0.0881615	expanded both
ILMN_1720745	LOC644037	1.09035	0.11662	expanded ghs
ILMN_1721035	MS4A6A	0.246718	0.937038	expanded ghs
ILMN_1721659	PSMC1	12.5793	0.59478	expanded ghs
ILMN_1722622	CD163	0	0.101492	expanded ghs
ILMN_1723884	ARF4	1.23242	0.928997	expanded both
ILMN_1723912	IFI44L	0.610957	0	expanded both
ILMN_1724139	TMEM123	0.132381	0.168198	expanded both
ILMN_1724422	SELL	0.0976875	0.074507	expanded ghs
ILMN_1724495	SESTD1	0	0.270894	expanded ghs
ILMN_1724837	ZC3HAV1	0.176377	0.671932	expanded both
ILMN_1725320	SIGLEC1	2.0073	0.100169	expanded both
ILMN_1725700	MOV10	29.5257	0	expanded both
ILMN_1725992	RAPGEF6	0.765018	2.03912	expanded ghs
ILMN_1726245	TGFBR2	0.0721738	1.14348	expanded ghs
ILMN_1726591	CARD16	0.274937	0	expanded ghs
ILMN_1726667	hCG_1789710	0	0.163389	expanded ghs
ILMN_1726930	C5orf44	0.197186	0.630916	expanded ghs
ILMN_1727271	WARS	0.791764	0	expanded ghs
ILMN_1728168	SLMO2	1.74479	6.02531	expanded both
ILMN_1729167	EFTUD1	0.0756924	0.135172	expanded ghs
ILMN_1729269	LOC285074	10.2451	11.7827	expanded ghs
ILMN_1729749	--	0.158023	0.134175	expanded both
ILMN_1729973	ZC3HAV1	3.4833	0.176393	expanded both
ILMN_1731224	PARP9	1.17376	0.0688947	expanded ghs
ILMN_1731546	RPL26	0	0.152981	expanded ghs
ILMN_1732074	LOC644037	2.48209	0.213094	expanded ghs
ILMN_1732313	LOC647195	0.115293	0.115679	expanded ghs
ILMN_1732328	RPL22	0.176457	0.2979	expanded ghs
ILMN_1732575	SEC14L1	0.261661	0.110107	expanded ghs
ILMN_1732776	NUP98	0	0.627425	expanded ghs
ILMN_1733115	KIAA1219	0	0.0928586	expanded ghs
ILMN_1733666	--	0	2.19779	expanded ghs
ILMN_1733956	IARS	0.0696534	0.176432	expanded ghs
ILMN_1734138	TATDN2	1.73693	0.785066	expanded ghs
ILMN_1734440	C14orf133	0.186529	0.220357	expanded ghs
ILMN_1736165	MLL3	0.107171	0.572828	expanded ghs
ILMN_1736327	CDC42EP3	0.387582	2.26055	expanded both
ILMN_1736460	MDM1	0	0.298741	expanded both
ILMN_1736729	OAS2	8.59915	0.103318	target both
ILMN_1736806	PAG1	0.392846	3.25228	expanded ghs
ILMN_1737308	GLRX	0.149154	0.398606	expanded ghs
ILMN_1737498	--	0	0	expanded both
ILMN_1737574	LOC648605	0.179819	0.383854	expanded ghs
ILMN_1737599	TRIM5	0.0918781	0.0711027	expanded ghs
ILMN_1737705	UHRF1BP1L	0.068702	2.32507	expanded ghs
ILMN_1737857	GTF2B	0.688237	2.57597	expanded both
ILMN_1738326	EIF4E2	2.08018	0.226748	expanded both
ILMN_1738491	SNX30	0.115892	0.485755	expanded ghs
ILMN_1738704	TRIM26	0.787573	0	expanded ghs
ILMN_1738784	PPP2R5A	0.134064	0.677253	expanded ghs
ILMN_1738992	MNDA	0.788385	0.475649	expanded ghs
ILMN_1739428	IFIT2	0.410442	0.127839	target both
ILMN_1739454	USP34	0.102038	0.295886	expanded ghs
ILMN_1740345	THYN1	7.20766	3.4531	expanded ghs
ILMN_1740875	FPR2	0.261952	0.171908	expanded ghs
ILMN_1741288	ZNF136	0.0845379	0.856356	expanded ghs
ILMN_1741869	WDR47	0.101117	0.892131	expanded ghs
ILMN_1742276	C7orf64	0.54523	0.000308232	expanded both
ILMN_1742618	XAF1	1.36429	0.143957	expanded both
ILMN_1742705	SLC39A11	2.01175	0.329703	expanded ghs
ILMN_1742887	HBXIP	4.23308	0.492205	expanded ghs
ILMN_1742929	HESX1	9.44531e-15	0	expanded both
ILMN_1744059	DCTN6	4.50616	0.545557	expanded ghs
ILMN_1744308	DHX33	7.00289	2.71415	expanded ghs
ILMN_1744316	TATDN3	1.03395	2.4605	expanded both
ILMN_1745242	PLSCR1	0	0.0775353	expanded both
ILMN_1745374	IFI35	0.12156	0	expanded both
ILMN_1745397	--	0.939519	0.0835165	expanded ghs
ILMN_1745946	CCDC5	3.56842	1.63049	expanded ghs
ILMN_1746090	STT3A	0	0.339833	expanded ghs
ILMN_1746276	EPC1	0.120098	14.8811	expanded ghs
ILMN_1746516	RPS25	0.223229	1.04666	expanded ghs
ILMN_1747162	DDX47	1.77986	0.438141	expanded both
ILMN_1747744	LHFPL2	0.13386	0.140784	expanded ghs
ILMN_1747759	WSB1	0	26.0191	expanded ghs
ILMN_1749014	ACLY	0.0603399	0.106245	expanded ghs
ILMN_1749210	BUD13	0.107731	0.508481	expanded ghs
ILMN_1749634	PLRG1	0.338604	0.219397	expanded ghs
ILMN_1750044	ZNHIT3	2.73979	0.362837	expanded ghs
ILMN_1750321	LBA1	2.40124	0.0771769	expanded ghs
ILMN_1750658	HAX1	1.40509	0.139868	expanded ghs
ILMN_1751984	PRKAG1	9.24675	0.184169	expanded ghs
ILMN_1752086	C4orf41	0.0611886	0.189285	expanded ghs
ILMN_1752355	MPEG1	0.57263	0.378234	expanded ghs
ILMN_1752455	DOCK5	0.793025	0.520953	expanded ghs
ILMN_1752526	RNF144B	0.103689	1.13913	expanded ghs
ILMN_1752582	RAB5B	0	0.313212	expanded ghs
ILMN_1752639	SLC25A24	0	0.136914	expanded both
ILMN_1752895	STX8	1.57393	3.39154	expanded ghs
ILMN_1753016	MRPL35	0.312961	0.45545	expanded ghs
ILMN_1753196	PTTG1	1.26293	0.433553	expanded ghs
ILMN_1754051	RMI1	0	0.162414	expanded ghs
ILMN_1754195	RPL31	0	4.18004	expanded ghs
ILMN_1754303	RPL30	0.320467	1.05293	expanded ghs
ILMN_1755536	PFDN5	5.54715	0.289798	expanded ghs
ILMN_1755589	DIP2B	0.116256	0.150108	expanded ghs
ILMN_1755749	LOC100132888	0.924479	0	expanded ghs
ILMN_1755926	DBI	0.460991	1.53253e-09	expanded ghs
ILMN_1756360	RPL35A	0.0638227	0.183687	expanded ghs
ILMN_1756590	--	0	0.494045	expanded ghs
ILMN_1756862	--	2.50579	0	expanded both
ILMN_1756999	RBL2	0	0.332636	expanded ghs
ILMN_1757072	--	0	0.151552	expanded ghs
ILMN_1757074	GNG10	0.0643605	0.00176463	expanded ghs
ILMN_1757336	LRCH3	1.20102	0.291639	expanded both
ILMN_1758093	C14orf101	0.482781	0.528415	expanded ghs
ILMN_1758250	TRAFD1	0.518941	0	expanded ghs
ILMN_1758778	CEP110	0.296438	1.48828	expanded ghs
ILMN_1758864	VNN2	0	27.5861	expanded ghs
ILMN_1759883	SRP9	0.295689	0	expanded ghs
ILMN_1760062	IFI44	0	0	target both
ILMN_1760347	SRGN	0.131647	1.58068	expanded ghs
ILMN_1760575	PTP4A1	0	0.119439	expanded ghs
ILMN_1760593	CRY1	0	1.633	expanded ghs
ILMN_1760741	NDUFA9	1.29327	0.0824827	expanded ghs
ILMN_1760922	GIT2	0.360316	0.379027	expanded both
ILMN_1761281	--	0.0866041	0.662601	expanded ghs
ILMN_1761922	--	0.15806	0.184065	expanded ghs
ILMN_1762002	CSTF3	20.3486	0.0127106	expanded ghs
ILMN_1763007	HIAT1	0	0.682673	expanded ghs
ILMN_1764414	SOS2	0.091716	8.98537	expanded ghs
ILMN_1764415	ZNF585A	0	1.18088	expanded ghs
ILMN_1764851	--	0.0908097	0.203176	expanded ghs
ILMN_1764854	ZNF761	0.774279	0.29265	expanded ghs
ILMN_1765994	--	0.0625394	0	expanded both
ILMN_1766798	ACAP2	0	0.219582	expanded ghs
ILMN_1767135	SOS1	0.138996	0.733983	expanded ghs
ILMN_1767365	PAK1	0.213859	0.309657	expanded ghs
ILMN_1767722	AFTPH	0.0700318	0.14549	expanded ghs
ILMN_1768181	TOR3A	0.803595	0	expanded ghs
ILMN_1768271	SMAP1	0.14681	0.381872	expanded ghs
ILMN_1768743	FIP1L1	0	0.461918	expanded ghs
ILMN_1768816	TMPO	0.0992446	0.346755	expanded both
ILMN_1768969	LBR	0.0836823	6.07055	expanded both
ILMN_1769140	KIAA1958	0	0	expanded ghs
ILMN_1769383	GIMAP5	0	0.377886	expanded ghs
ILMN_1769606	PIWIL4	0.276361	21.0784	expanded ghs
ILMN_1770048	DPH5	0	0.820779	expanded ghs
ILMN_1770085	BTG2	1.41598	0.195691	expanded ghs
ILMN_1770454	AGRN	0	0.0882821	expanded ghs
ILMN_1771385	GBP4	0.560666	0.165822	expanded both
ILMN_1772156	ERP44	0	0	expanded ghs
ILMN_1772489	SDCCAG1	0.102696	0.924484	expanded ghs
ILMN_1772540	ATMIN	0	0.102097	expanded ghs
ILMN_1772651	CNOT2	0.129972	0.138187	expanded ghs
ILMN_1772929	ATP5J	0	0	expanded ghs
ILMN_1772964	CCL8	0.690221	0	expanded both
ILMN_1773148	C11orf61	0.162016	0.19556	expanded ghs
ILMN_1773247	ZNF410	0.923562	4.0823	expanded ghs
ILMN_1773505	USP4	0	0	expanded both
ILMN_1773847	DYNC1I2	0.146883	2.35251	expanded both
ILMN_1774077	GBP2	0.127656	0.18105	expanded both
ILMN_1774110	CHN2	0.533155	1.21934	expanded ghs
ILMN_1774287	CFB	8.23178	0	expanded both
ILMN_1774823	RPL34	0.199919	0.515287	expanded ghs
ILMN_1774949	PIGP	0	0.118208	expanded ghs
ILMN_1775901	PHF5A	0.468746	0.182058	expanded ghs
ILMN_1776005	OSTC	1.42671	0.601026	expanded ghs
ILMN_1776102	PSMD10	0	0.243878	expanded ghs
ILMN_1776104	NDUFS5	0.836214	1.42998	expanded ghs
ILMN_1776154	COG3	0.088168	0.891766	expanded ghs
ILMN_1776678	GIMAP7	0.752823	0.400077	expanded ghs
ILMN_1777325	STAT1	0.0694743	0.371796	expanded both
ILMN_1777461	FLJ78302	1.78505	0.908498	expanded ghs
ILMN_1777565	--	0.16455	0	expanded ghs
ILMN_1777998	ARHGAP25	1.90202	4.15222	expanded ghs
ILMN_1778599	--	10.4132	0	expanded both
ILMN_1778709	PICALM	0.194645	5.14619	expanded ghs
ILMN_1779163	C11orf67	10.7971	0.196873	expanded ghs
ILMN_1779252	--	0.758882	0	expanded both
ILMN_1779258	--	7.31936	0.277317	expanded ghs
ILMN_1780368	GPR18	0.0774972	0.106265	expanded both
ILMN_1780598	PIAS1	0.152798	2.03388	expanded ghs
ILMN_1781151	ARMC8	8.5203	0.618531	expanded both
ILMN_1781516	SUPT16H	0.345232	0.195256	expanded ghs
ILMN_1781795	ERH	0.539034	0.391795	expanded ghs
ILMN_1781819	PAPSS1	0.47895	4.12857	expanded ghs
ILMN_1782487	GBP1	0.142395	0.357556	expanded ghs
ILMN_1782579	IMMT	0	0.433793	expanded ghs
ILMN_1782743	LETMD1	0.397038	0.434635	expanded ghs
ILMN_1783226	SSR2	1.96156	0.255037	expanded ghs
ILMN_1783621	CMPK2	3.12037	0.00248989	expanded both
ILMN_1783753	TXNDC12	0.0187425	0	expanded both
ILMN_1784286	NDUFA1	0.434319	1.40295	expanded ghs
ILMN_1784380	--	4.54205	0	expanded both
ILMN_1784946	ORC3L	0.207151	0.236929	expanded ghs
ILMN_1785158	HERPUD2	0.061773	0.109941	expanded ghs
ILMN_1785711	NEDD8	0.68054	0.317217	expanded ghs
ILMN_1785831	ZDHHC13	0	0.231518	expanded ghs
ILMN_1785988	CSNK1A1	0.0700704	0.203585	expanded both
ILMN_1786429	P2RY5	0.210385	0	expanded ghs
ILMN_1786532	CNIH	0.696307	0.387785	expanded both
ILMN_1786612	PSME2	1.65787	0.0779131	expanded both
ILMN_1786759	C11orf10	0.839811	0.192016	expanded both
ILMN_1787370	C2orf56	1.95805	3.45147	expanded both
ILMN_1787509	PRIC285	0.0698011	0	expanded both
ILMN_1787949	RPS15A	0	1.07991	expanded ghs
ILMN_1788017	--	0.084215	0	expanded both
ILMN_1789283	PPP2R5C	58.2105	3.91928	expanded ghs
ILMN_1790354	RABGGTB	0.000134508	0.260485	expanded ghs
ILMN_1790471	--	1.36439	0	expanded ghs
ILMN_1790819	MEMO1	0.344666	0.56934	expanded ghs
ILMN_1790881	HNMT	0.144571	0.612783	expanded ghs
ILMN_1790973	CDS2	0.100713	0.346327	expanded ghs
ILMN_1791093	PPHLN1	1.28052	2.1301	expanded ghs
ILMN_1791759	CXCL10	1.97732	0.00579537	expanded both
ILMN_1792270	C10orf46	3.58163	0	expanded both
ILMN_1792473	AIF1	0.333352	0.145528	expanded ghs
ILMN_1792528	RPS25	0.0930629	0.224095	expanded ghs
ILMN_1793220	GART	1.44406	0.828708	expanded both
ILMN_1793384	JAK1	0	0.191735	expanded both
ILMN_1794505	SHFM1	0.311332	3.99456	expanded ghs
ILMN_1794912	ATP5H	0.088111	0.229423	expanded ghs
ILMN_1795181	DDX60	6.78856	0.0616797	expanded both
ILMN_1795247	ARID2	0	4.62604	expanded ghs
ILMN_1795495	ERCC5	0.108444	0.738127	expanded ghs
ILMN_1795905	ZBTB4	2.25345	5.03533	expanded ghs
ILMN_1795964	UBR1	2.23634	2.23434	expanded both
ILMN_1796063	TRIM44	0.237499	0.451798	expanded ghs
ILMN_1796146	EIF4E3	0.174916	0.141816	expanded ghs
ILMN_1796855	TIAL1	0.092636	0.362656	expanded ghs
ILMN_1796962	PPP3R1	0	1.7825	expanded ghs
ILMN_1797001	DDX58	0.117119	0.0833368	expanded both
ILMN_1797895	FFAR2	0.0684982	0.118428	expanded both
ILMN_1797974	AIG1	11.4237	0.0200521	expanded ghs
ILMN_1798108	C6orf211	0.339208	0.517905	expanded ghs
ILMN_1798181	IRF7	0.504114	0.546821	expanded both
ILMN_1798380	UBQLN1	0.128661	1.12403	expanded ghs
ILMN_1798454	MAD2L1BP	0	0.454556	expanded both
ILMN_1799208	CSGALNACT2	0.102438	0.750097	expanded both
ILMN_1799467	--	0.186245	0.0987794	expanded both
ILMN_1799796	DIS3	0.102135	0.24568	expanded ghs
ILMN_1799814	SNRNP40	0.302422	0.183106	expanded ghs
ILMN_1799848	ANKRD22	0.428921	0.00012348	expanded ghs
ILMN_1800897	NRD1	0.187307	0.478372	expanded ghs
ILMN_1801121	SENP2	0.355284	1.62783	expanded ghs
ILMN_1801246	IFITM1	0.893054	0	expanded both
ILMN_1801307	TNFSF10	5.25267	0.313212	expanded both
ILMN_1801553	LEO1	1.8986	0.341603	expanded ghs
ILMN_1801584	CXCR4	0.873539	1.02481	expanded both
ILMN_1801913	PPIH	0.228708	0.94615	expanded both
ILMN_1801999	LOC727908	0	0.908552	expanded ghs
ILMN_1802106	APOBEC3G	2.03092	0.00772955	expanded ghs
ILMN_1803254	SMEK1	0.113033	0.154807	expanded ghs
ILMN_1805481	TRMT11	0.0674497	1.65411	expanded ghs
ILMN_1805750	IFITM3	0.211598	0.0927605	expanded both
ILMN_1806266	RAP1GDS1	0.126758	0.118647	expanded ghs
ILMN_1806294	RPS6KA3	1.57094	1.782	expanded both
ILMN_1806818	MCM3	1.37146	0.802782	expanded ghs
ILMN_1807633	HRSP12	2.62687	3.76167	expanded ghs
ILMN_1808148	--	0.167359	0.140824	expanded ghs
ILMN_1808938	PIGF	0	1.1096	expanded ghs
ILMN_1808939	RPS6	0.108449	0.365944	expanded both
ILMN_1809467	VAMP5	0.206448	1.29324	expanded ghs
ILMN_1809582	VPS13C	0.13866	0.0734105	expanded both
ILMN_1810577	RPS4X	0.352685	1.32256	expanded ghs
ILMN_1810977	CDV3	0.429544	0.490308	expanded both
ILMN_1811472	KIF23	0.000738016	53.9083	expanded ghs
ILMN_1812384	NR3C1	0.208952	2.12357	expanded ghs
ILMN_1812759	GCH1	0.416853	0	expanded both
ILMN_1813455	SP110	0.280166	0.135171	expanded both
ILMN_1813801	LOC643668	16.5185	0.00446341	expanded ghs
ILMN_1814305	--	0	0.209402	expanded both
ILMN_1815134	PI4K2B	0.0601366	0.103297	expanded ghs
ILMN_1815723	NUP35	0.294176	0.919284	expanded ghs
ILMN_1822495	--	1.40102	0.513931	expanded ghs
ILMN_1835092	IFI44L	4.15369	0	expanded ghs
ILMN_1838310	--	0.544685	0.391031	expanded ghs
ILMN_1838885	KIAA1632	1.7529	0.826388	expanded ghs
ILMN_1840920	--	0	0.818935	expanded ghs
ILMN_1841620	--	0.112762	3.39897	expanded ghs
ILMN_1845037	--	0.192097	0.140214	expanded ghs
ILMN_1847965	--	0	0.642765	expanded ghs
ILMN_1848843	--	0.0809794	0	expanded ghs
ILMN_1856861	INO80D	0.350499	1.13787	expanded ghs
ILMN_1860051	--	4.4649e-12	8.39815e-12	expanded ghs
ILMN_1908488	--	0.126049	0.0907995	expanded ghs
ILMN_1910908	--	0.425489	0.126157	expanded ghs
ILMN_1913060	--	2.52994	0.313629	expanded ghs
ILMN_1913537	--	0.121194	0.913033	expanded ghs
ILMN_2038776	TXN	0.546117	1.1399	expanded ghs
ILMN_2049727	C20orf111	2.29849	3.07522	expanded ghs
ILMN_2053527	PARP9	0.0599356	0.124017	expanded both
ILMN_2054019	ISG15	0.0966517	0.387556	target both
ILMN_2058782	IFI27	0.237467	0.179593	expanded both
ILMN_2069593	SFRS2IP	0.494374	0.391487	expanded ghs
ILMN_2070044	PPM1K	0.100307	0.114368	expanded ghs
ILMN_2078697	--	3.10687	0.182306	expanded ghs
ILMN_2083567	PHLPPL	0.223752	0.338454	expanded ghs
ILMN_2084353	M6PR	0.206275	0.353577	expanded both
ILMN_2088172	POLR2B	0	0.120405	expanded ghs
ILMN_2093343	PLAC8	2.45534	0.115142	expanded ghs
ILMN_2094166	CHMP5	9.99745	0.405722	expanded both
ILMN_2094396	LRRC8C	0.281928	0	expanded ghs
ILMN_2110281	UFC1	1.76744	0.587346	expanded ghs
ILMN_2114568	GBP5	4.13631	0.0933605	expanded both
ILMN_2119297	SAMD4A	0.00200639	0	expanded both
ILMN_2123567	SENP2	0.090573	0.337112	expanded ghs
ILMN_2123743	FCER1G	0.524621	0.299187	expanded ghs
ILMN_2128128	SHFM1	0.239398	0.209413	expanded ghs
ILMN_2129015	AFF1	0.327897	5.40518	expanded ghs
ILMN_2132599	ANKRD22	0.244562	0.10386	expanded both
ILMN_2134110	SELK	1.41182	0.152815	expanded ghs
ILMN_2137464	DVL3	0.220896	0.83467	expanded ghs
ILMN_2147920	BRD7P2	0.495067	1.43063	expanded ghs
ILMN_2148785	GBP1	0	0.118744	expanded both
ILMN_2150352	CBWD5	0.47326	0.470853	expanded ghs
ILMN_2151281	GABARAPL1	0.126542	0.434957	expanded ghs
ILMN_2152581	STK38	0.201498	0.90989	expanded ghs
ILMN_2154052	KDSR	0	0.071548	expanded ghs
ILMN_2160388	RPL24	1.06452	0.667907	expanded ghs
ILMN_2166831	RPS4X	0.348154	0.516282	expanded ghs
ILMN_2169152	SRGN	0.205129	3.32735	expanded ghs
ILMN_2173975	RTP4	6.63826	0	expanded both
ILMN_2174884	XPO7	33.3514	0.166892	expanded both
ILMN_2181089	VPRBP	0.251502	0	expanded ghs
ILMN_2184262	--	0.250194	0.0702262	expanded both
ILMN_2188374	XPOT	0.0616491	199.782	expanded both
ILMN_2189933	RPL36AL	2.12924	0.723099	expanded ghs
ILMN_2189936	RPL36AL	0.612509	1.77225	expanded ghs
ILMN_2208158	GTF2IP1	0.0794517	0.681293	expanded ghs
ILMN_2215656	MAGOH	0.363422	0.359422	expanded ghs
ILMN_2221673	ASNSD1	0	0.0783246	expanded ghs
ILMN_2231928	MX2	2.62238	0.0892101	expanded both
ILMN_2232478	APOBEC3G	1.46171	0.115296	expanded both
ILMN_2232936	UQCRH	0.295503	0.720772	expanded ghs
ILMN_2239754	IFIT3	3.15579	0	target both
ILMN_2242463	CTSC	0.989705	0.255164	expanded ghs
ILMN_2246882	SP140	42.0506	0.0452772	expanded both
ILMN_2248970	--	0.651366	0.678248	expanded both
ILMN_2255310	RPS15A	0	7.97122	expanded ghs
ILMN_2261600	FCGR1C	0	0.166346	expanded both
ILMN_2274923	MOCS2	1.43869	11.6669	expanded ghs
ILMN_2276996	FLJ78302	0.136858	0.133573	expanded ghs
ILMN_2278819	PDE7A	0.115688	0	expanded ghs
ILMN_2279635	EIF4G2	0.186285	0.566631	expanded both
ILMN_2280911	VPS41	0.137709	0.50657	expanded both
ILMN_2281128	PSMD10	0.204923	1.08271	expanded ghs
ILMN_2286334	SR140	0	0.204452	expanded ghs
ILMN_2289093	--	0.146262	0.240686	expanded both
ILMN_2292178	CLEC12A	0	0.331207	expanded both
ILMN_2305544	DBI	1.22508	1.60955	expanded ghs
ILMN_2311548	PTRH2	0.584053	1.69966	expanded ghs
ILMN_2318011	PSMA3	0.10801	0	expanded ghs
ILMN_2320964	ADAR	0.143223	0	expanded both
ILMN_2321634	RAD17	0.260423	3.27562	expanded ghs
ILMN_2322842	PPHLN1	2.71677	2.31086	expanded both
ILMN_2324056	GNL3	0.165034	0.326487	expanded both
ILMN_2324157	UBA3	0	0.666268	expanded both
ILMN_2324375	CHCHD7	0.106929	1.10668	expanded ghs
ILMN_2324998	NGDN	1.11311	0.481788	expanded ghs
ILMN_2325008	DHX40P	0	0	expanded ghs
ILMN_2325574	CASC4	0.211798	0.734167	expanded ghs
ILMN_2328378	OSBPL3	1.03894	3.41395	expanded ghs
ILMN_2330994	--	0.37215	1.02355	expanded ghs
ILMN_2333594	SUMO2	0.288122	1.12628	expanded both
ILMN_2334042	THYN1	13.9356	0.90415	expanded ghs
ILMN_2335813	GCH1	0.39082	0.0694488	expanded both
ILMN_2338452	SERPINA1	0	0.108457	expanded ghs
ILMN_2338480	RHOT1	0	0.383551	expanded ghs
ILMN_2340565	ATP2C1	0.209708	3.88086	expanded both
ILMN_2344007	SIP1	3.43828	0.471209	expanded ghs
ILMN_2344956	ACP1	0.0614275	0	expanded ghs
ILMN_2347798	IFI6	0.147897	0.330506	target both
ILMN_2348093	ATP5J	0	0.101641	expanded ghs
ILMN_2349061	IRF7	0.0668476	1.18306	expanded both
ILMN_2349600	BRD8	1.04864e-05	0.541658	expanded ghs
ILMN_2353327	RNF38	0.280944	2.27599	expanded both
ILMN_2355776	GIT2	0.349929	0.118827	expanded ghs
ILMN_2356284	PFDN5	1.69093	0.313572	expanded ghs
ILMN_2359800	MS4A6A	0.152084	1.47757	expanded ghs
ILMN_2360415	PRNP	0.0653231	0.425782	expanded ghs
ILMN_2362122	AP3M1	7.61703e-06	0.149193	expanded ghs
ILMN_2362245	HNRNPH2	0.44223	0.321221	expanded both
ILMN_2363591	SDCBP	0.1408	0.57582	expanded ghs
ILMN_2364971	PPP2R5C	2.64969	3.467	expanded both
ILMN_2365479	SNX1	0.674983	0.279879	expanded ghs
ILMN_2365484	SNX1	1.53837	8.16935	expanded ghs
ILMN_2366391	PRDX1	2.0732	0.627863	expanded both
ILMN_2367753	ATP2B4	0	0.297333	expanded ghs
ILMN_2369221	IL15	0	0	expanded both
ILMN_2370882	ACSL5	0	0.131538	expanded ghs
ILMN_2370976	MYOF	5.98757	0.00497025	expanded both
ILMN_2372413	BID	1.06404	0.00369404	expanded ghs
ILMN_2373763	--	3.79275	0.122653	expanded ghs
ILMN_2373831	BTN3A3	25.2054	0.831492	expanded ghs
ILMN_2374159	HERPUD1	0	0.265862	expanded ghs
ILMN_2374164	HERPUD1	0.0913304	0.239775	expanded ghs
ILMN_2374293	DYRK1A	0.298619	0.476701	expanded ghs
ILMN_2374770	TAX1BP1	0.120265	1.22669	expanded ghs
ILMN_2374865	ATF3	23.6777	0.0616461	expanded ghs
ILMN_2376108	PSMB9	0.13337	0	expanded both
ILMN_2376833	ZNF200	0.245626	3.81738	expanded ghs
ILMN_2378100	FBXL5	0.225521	3.66998	expanded ghs
ILMN_2379326	MAP3K7	0.379019	2.45556	expanded both
ILMN_2381603	ING3	1.63118	2.65492	expanded both
ILMN_2383435	PSMD10	0.342219	1.93677	expanded both
ILMN_2384181	DHRS9	1.15814	0.08022	expanded ghs
ILMN_2384536	PECI	1.41379	2.35168	expanded ghs
ILMN_2387553	PSMA3	0.23196	0.597877	expanded ghs
ILMN_2388605	ACTR2	0	0.153642	expanded ghs
ILMN_2391750	SFMBT1	0.196354	0.0799977	expanded ghs
ILMN_2392143	TRAF6	2.3299	0.540112	expanded ghs
ILMN_2392569	FPR2	0.416461	0.120163	expanded both
ILMN_2394561	IRF2BP2	3.33788e-05	0	expanded ghs
ILMN_2394750	EXOC4	2.15215	2.41806	expanded both
ILMN_2395969	PRDX3	0	0.708505	expanded ghs
ILMN_2395974	PRDX3	0.407626	0.318308	expanded ghs
ILMN_2397571	PIGC	1.92282	0.202103	expanded ghs
ILMN_2398903	HAX1	5.85483	0.578455	expanded ghs
ILMN_2399627	AP1G1	0.0731599	0.125481	expanded ghs
ILMN_2399893	RPS24	0.0765858	0	expanded ghs
ILMN_2401769	PHF14	0.389363	0.361298	expanded ghs
ILMN_2402272	TCEAL8	0.288796	3.88967	expanded ghs
ILMN_2404629	EFTUD1	0.508393	1.99208	expanded ghs
ILMN_2404665	TRIM5	0.0793563	2.48928e-08	expanded both
ILMN_2405521	MTHFD2	0.108824	0.0893201	expanded both
ILMN_2408851	ARHGAP30	0.263046	0.216752	expanded ghs
ILMN_2408877	MLL3	0.106513	1.72083	expanded ghs
ILMN_2410826	OAS1	0.141771	0.0993173	expanded both
ILMN_2412172	APOBEC3F	5.99977	0.00535415	expanded both
ILMN_2413517	TRIM39	0.917824	0.218489	expanded ghs
ILMN_2413808	CD53	0.214977	0.578894	expanded ghs
